# Supplementary material for: Electrostatics of salt-dependent reentrant phase behaviors highlights diverse roles of ATP in biomolecular condensates
Source: eLife journal article supplement (doi:10.7554/elife.100284), 2024-09-05
Supplement: app1-fig3-data1 [file elife-100284-app1-fig3-data1-v1.zip]

## Sheet: Sheet1
	Caprin1, 200 mM NaCl
	200K			210K			225K			200K			210K			225K
	Z (angstorm)	[Cl-] (mg/ml)		Z (angstorm)	[Cl-] (mg/ml)		Z (angstorm)	[Cl-] (mg/ml)		Z (angstorm)	[Na+] (mg/ml)		Z (angstorm)	[Na+] (mg/ml)		Z (angstorm)	[Na+] (mg/ml)
	-2600	7.10891		-2600	7.1015		-2600	7.18229		-2600	4.59399		-2600	4.61307		-2600	4.65177
	-2590	7.14652		-2590	7.14627		-2590	7.18461		-2590	4.63726		-2590	4.6404		-2590	4.64255
	-2580	7.04087		-2580	7.12802		-2580	7.12778		-2580	4.57945		-2580	4.62189		-2580	4.61827
	-2570	7.12625		-2570	7.16783		-2570	7.15166		-2570	4.6143		-2570	4.63385		-2570	4.6406
	-2560	7.09091		-2560	7.15031		-2560	7.14676		-2560	4.6015		-2560	4.63667		-2560	4.62379
	-2550	7.11951		-2550	7.13837		-2550	7.13219		-2550	4.61287		-2550	4.61259		-2550	4.63683
	-2540	7.13439		-2540	7.09985		-2540	7.15136		-2540	4.60146		-2540	4.61446		-2540	4.63579
	-2530	7.07786		-2530	7.11436		-2530	7.18088		-2530	4.59522		-2530	4.61191		-2530	4.62495
	-2520	7.06671		-2520	7.15093		-2520	7.20819		-2520	4.59757		-2520	4.60643		-2520	4.64791
	-2510	7.09054		-2510	7.12974		-2510	7.17138		-2510	4.61052		-2510	4.61473		-2510	4.65018
	-2500	7.10585		-2500	7.14211		-2500	7.17255		-2500	4.61072		-2500	4.60436		-2500	4.63289
	-2490	7.13843		-2490	7.15791		-2490	7.18492		-2490	4.63055		-2490	4.61163		-2490	4.64442
	-2480	7.117		-2480	7.1271		-2480	7.14903		-2480	4.61823		-2480	4.59085		-2480	4.64021
	-2470	7.09642		-2470	7.13237		-2470	7.15987		-2470	4.60484		-2470	4.59363		-2470	4.64398
	-2460	7.08754		-2460	7.10995		-2460	7.17959		-2460	4.5866		-2460	4.62443		-2460	4.62956
	-2450	7.10328		-2450	7.11816		-2450	7.18235		-2450	4.60706		-2450	4.62042		-2450	4.61982
	-2440	7.1072		-2440	7.12465		-2440	7.16642		-2440	4.5959		-2440	4.59995		-2440	4.64907
	-2430	7.10187		-2430	7.14101		-2430	7.16918		-2430	4.59415		-2430	4.64152		-2430	4.6385
	-2420	7.10316		-2420	7.12606		-2420	7.15521		-2420	4.59292		-2420	4.61708		-2420	4.64303
	-2410	7.11295		-2410	7.14113		-2410	7.13568		-2410	4.62002		-2410	4.60436		-2410	4.62554
	-2400	7.12986		-2400	7.1437		-2400	7.13488		-2400	4.61696		-2400	4.64299		-2400	4.61152
	-2390	7.09213		-2390	7.14652		-2390	7.17212		-2390	4.60484		-2390	4.61879		-2390	4.62979
	-2380	7.09305		-2380	7.11528		-2380	7.16508		-2380	4.58561		-2380	4.61005		-2380	4.63726
	-2370	7.08484		-2370	7.13709		-2370	7.16501		-2370	4.61624		-2370	4.62574		-2370	4.62352
	-2360	7.11608		-2360	7.1448		-2360	7.14946		-2360	4.61116		-2360	4.60142		-2360	4.62193
	-2350	7.07412		-2350	7.10579		-2350	7.16667		-2350	4.61199		-2350	4.60953		-2350	4.62562
	-2340	7.09397		-2340	7.16887		-2340	7.19931		-2340	4.59502		-2340	4.63142		-2340	4.65113
	-2330	7.10806		-2330	7.16575		-2330	7.2006		-2330	4.60921		-2330	4.63373		-2330	4.62518
	-2320	7.10769		-2320	7.15515		-2320	7.17426		-2320	4.63035		-2320	4.62681		-2320	4.64239
	-2310	7.12263		-2310	7.15852		-2310	7.14762		-2310	4.6172		-2310	4.6193		-2310	4.62594
	-2300	7.10818		-2300	7.13745		-2300	7.18431		-2300	4.58759		-2300	4.63583		-2300	4.64223
	-2290	7.06941		-2290	7.11577		-2290	7.1655		-2290	4.59908		-2290	4.61247		-2290	4.61056
	-2280	7.08331		-2280	7.13323		-2280	7.17922		-2280	4.56105		-2280	4.60277		-2280	4.65658
	-2270	7.09568		-2270	7.15393		-2270	7.16857		-2270	4.60885		-2270	4.62487		-2270	4.63881
	-2260	7.10971		-2260	7.09421		-2260	7.16808		-2260	4.59916		-2260	4.62403		-2260	4.64195
	-2250	7.11075		-2250	7.12821		-2250	7.16495		-2250	4.61211		-2250	4.61795		-2250	4.62276
	-2240	7.07419		-2240	7.12943		-2240	7.14535		-2240	4.58553		-2240	4.63277		-2240	4.62495
	-2230	7.068		-2230	7.12092		-2230	7.1603		-2230	4.60265		-2230	4.60981		-2230	4.61823
	-2220	7.08613		-2220	7.11841		-2220	7.16979		-2220	4.59677		-2220	4.61676		-2220	4.6325
	-2210	7.05869		-2210	7.12606		-2210	7.21101		-2210	4.58358		-2210	4.62316		-2210	4.64021
	-2200	7.10003		-2200	7.14529		-2200	7.15044		-2200	4.60567		-2200	4.62205		-2200	4.61652
	-2190	7.07455		-2190	7.12153		-2190	7.16201		-2190	4.58644		-2190	4.61692		-2190	4.63432
	-2180	7.11253		-2180	7.11822		-2180	7.20795		-2180	4.62256		-2180	4.62554		-2180	4.63611
	-2170	7.08693		-2170	7.09605		-2170	7.17922		-2170	4.58839		-2170	4.58887		-2170	4.61525
	-2160	7.08993		-2160	7.09826		-2160	7.18333		-2160	4.61338		-2160	4.59367		-2160	4.62995
	-2150	7.09323		-2150	7.13451		-2150	7.17984		-2150	4.59367		-2150	4.59594		-2150	4.6356
	-2140	7.08319		-2140	7.114		-2140	7.20421		-2140	4.60591		-2140	4.6108		-2140	4.64795
	-2130	7.12416		-2130	7.13243		-2130	7.14787		-2130	4.5988		-2130	4.62638		-2130	4.63305
	-2120	7.0917		-2120	7.14725		-2120	7.19098		-2120	4.59848		-2120	4.60631		-2120	4.64203
	-2110	7.12398		-2110	7.10224		-2110	7.17861		-2110	4.61076		-2110	4.60595		-2110	4.63726
	-2100	7.12894		-2100	7.13947		-2100	7.18639		-2100	4.60941		-2100	4.62836		-2100	4.63456
	-2090	7.08239		-2090	7.09666		-2090	7.14003		-2090	4.59363		-2090	4.60162		-2090	4.65197
	-2080	7.08203		-2080	7.10652		-2080	7.20146		-2080	4.59868		-2080	4.61767		-2080	4.64354
	-2070	7.07688		-2070	7.12612		-2070	7.15981		-2070	4.60277		-2070	4.62979		-2070	4.63424
	-2060	7.08007		-2060	7.14756		-2060	7.17138		-2060	4.58179		-2060	4.62864		-2060	4.64378
	-2050	7.08625		-2050	7.14039		-2050	7.19833		-2050	4.58934		-2050	4.62109		-2050	4.62435
	-2040	7.05177		-2040	7.13041		-2040	7.15822		-2040	4.58434		-2040	4.61473		-2040	4.61704
	-2030	7.02709		-2030	7.12208		-2030	7.16054		-2030	4.56669		-2030	4.63067		-2030	4.62614
	-2020	7.07051		-2020	7.13304		-2020	7.19423		-2020	4.60651		-2020	4.61418		-2020	4.63711
	-2010	7.04895		-2010	7.08435		-2010	7.23618		-2010	4.57985		-2010	4.59367		-2010	4.6472
	-2000	7.07768		-2000	7.14107		-2000	7.18026		-2000	4.60031		-2000	4.61748		-2000	4.64549
	-1990	7.08968		-1990	7.12471		-1990	7.16838		-1990	4.58497		-1990	4.60238		-1990	4.63417
	-1980	7.08882		-1980	7.09979		-1980	7.1625		-1980	4.60456		-1980	4.59038		-1980	4.63397
	-1970	7.08325		-1970	7.11602		-1970	7.16673		-1970	4.60341		-1970	4.58652		-1970	4.64195
	-1960	7.09133		-1960	7.13212		-1960	7.19453		-1960	4.59669		-1960	4.59097		-1960	4.64346
	-1950	7.09574		-1950	7.12		-1950	7.17683		-1950	4.58151		-1950	4.62216		-1950	4.6625
	-1940	7.1105		-1940	7.15834		-1940	7.16997		-1940	4.58104		-1940	4.62379		-1940	4.64402
	-1930	7.0974		-1930	7.1298		-1930	7.1072		-1930	4.59268		-1930	4.62197		-1930	4.61732
	-1920	7.10812		-1920	7.13029		-1920	7.11185		-1920	4.59936		-1920	4.62431		-1920	4.62006
	-1910	7.09495		-1910	7.11767		-1910	7.16391		-1910	4.58497		-1910	4.64283		-1910	4.63786
	-1900	7.07216		-1900	7.14199		-1900	7.14192		-1900	4.60973		-1900	4.63019		-1900	4.63603
	-1890	7.10934		-1890	7.09887		-1890	7.14615		-1890	4.61553		-1890	4.62912		-1890	4.61203
	-1880	7.11908		-1880	7.09887		-1880	7.16593		-1880	4.60595		-1880	4.61986		-1880	4.63405
	-1870	7.09262		-1870	7.07866		-1870	7.16863		-1870	4.62042		-1870	4.59006		-1870	4.63115
	-1860	7.07749		-1860	7.14719		-1860	7.22553		-1860	4.59785		-1860	4.61005		-1860	4.65221
	-1850	7.07155		-1850	7.13929		-1850	7.17083		-1850	4.6139		-1850	4.6112		-1850	4.62697
	-1840	7.08264		-1840	7.13219		-1840	7.1584		-1840	4.60738		-1840	4.61318		-1840	4.65225
	-1830	7.09593		-1830	7.13114		-1830	7.17298		-1830	4.61446		-1830	4.58159		-1830	4.61477
	-1820	7.10407		-1820	7.15056		-1820	7.20844		-1820	4.60265		-1820	4.61891		-1820	4.64585
	-1810	7.0808		-1810	7.12355		-1810	7.14633		-1810	4.59177		-1810	4.58986		-1810	4.63587
	-1800	7.10156		-1800	7.13739		-1800	7.15926		-1800	4.61577		-1800	4.59669		-1800	4.63925
	-1790	7.10689		-1790	7.15117		-1790	7.13292		-1790	4.56399		-1790	4.62912		-1790	4.63564
	-1780	7.0993		-1780	7.13911		-1780	7.14346		-1780	4.59336		-1780	4.63436		-1780	4.6404
	-1770	7.12882		-1770	7.12998		-1770	7.16269		-1770	4.57965		-1770	4.61124		-1770	4.66293
	-1760	7.1151		-1760	7.11204		-1760	7.16544		-1760	4.60226		-1760	4.62761		-1760	4.64267
	-1750	7.11087		-1750	7.11994		-1750	7.14609		-1750	4.59534		-1750	4.6474		-1750	4.6476
	-1740	7.10162		-1740	7.0936		-1740	7.18878		-1740	4.59081		-1740	4.6199		-1740	4.62054
	-1730	7.10634		-1730	7.14982		-1730	7.14952		-1730	4.62681		-1730	4.64275		-1730	4.62419
	-1720	7.11161		-1720	7.0936		-1720	7.18241		-1720	4.6325		-1720	4.63997		-1720	4.65439
	-1710	7.08337		-1710	7.11602		-1710	7.16538		-1710	4.60146		-1710	4.61954		-1710	4.60182
	-1700	7.04987		-1700	7.09256		-1700	7.20146		-1700	4.60722		-1700	4.59733		-1700	4.61744
	-1690	7.11449		-1690	7.11724		-1690	7.16318		-1690	4.60651		-1690	4.62534		-1690	4.62844
	-1680	7.09011		-1680	7.16734		-1680	7.17837		-1680	4.61561		-1680	4.61144		-1680	4.61883
	-1670	7.08374		-1670	7.13029		-1670	7.12404		-1670	4.59455		-1670	4.59125		-1670	4.58755
	-1660	7.09495		-1660	7.15209		-1660	7.20317		-1660	4.60408		-1660	4.60154		-1660	4.63715
	-1650	7.11712		-1650	7.14572		-1650	7.19245		-1650	4.59363		-1650	4.59677		-1650	4.67335
	-1640	7.1222		-1640	7.16569		-1640	7.14774		-1640	4.59347		-1640	4.60516		-1640	4.63897
	-1630	7.10236		-1630	7.12735		-1630	7.18694		-1630	4.57063		-1630	4.61255		-1630	4.64263
	-1620	7.08625		-1620	7.15889		-1620	7.12416		-1620	4.58791		-1620	4.61593		-1620	4.62137
	-1610	7.13139		-1610	7.09446		-1610	7.17745		-1610	4.59999		-1610	4.61644		-1610	4.66075
	-1600	7.15828		-1600	7.07964		-1600	7.18082		-1600	4.60023		-1600	4.61279		-1600	4.64915
	-1590	7.10769		-1590	7.0887		-1590	7.18712		-1590	4.58954		-1590	4.62844		-1590	4.63492
	-1580	7.10983		-1580	7.11351		-1580	7.16293		-1580	4.60122		-1580	4.65741		-1580	4.63667
	-1570	7.08062		-1570	7.10236		-1570	7.14927		-1570	4.60019		-1570	4.62928		-1570	4.62093
	-1560	7.09862		-1560	7.0906		-1560	7.19441		-1560	4.61533		-1560	4.63111		-1560	4.62745
	-1550	7.08405		-1550	7.13837		-1550	7.19319		-1550	4.61954		-1550	4.63762		-1550	4.62046
	-1540	7.05955		-1540	7.13041		-1540	7.20035		-1540	4.59455		-1540	4.61914		-1540	4.63174
	-1530	7.08013		-1530	7.12288		-1530	7.20415		-1530	4.60484		-1530	4.60631		-1530	4.61152
	-1520	7.10628		-1520	7.14799		-1520	7.16697		-1520	4.60579		-1520	4.60877		-1520	4.62991
	-1510	7.0985		-1510	7.13813		-1510	7.18369		-1510	4.6201		-1510	4.5684		-1510	4.62761
	-1500	7.13366		-1500	7.17763		-1500	7.22136		-1500	4.62669		-1500	4.61211		-1500	4.65229
	-1490	7.09311		-1490	7.14584		-1490	7.16569		-1490	4.60297		-1490	4.58239		-1490	4.62324
	-1480	7.0914		-1480	7.15969		-1480	7.19594		-1480	4.57182		-1480	4.60722		-1480	4.64005
	-1470	7.12778		-1470	7.11504		-1470	7.1908		-1470	4.60714		-1470	4.61044		-1470	4.63365
	-1460	7.114		-1460	7.13776		-1460	7.17108		-1460	4.5833		-1460	4.60929		-1460	4.64386
	-1450	7.15815		-1450	7.12098		-1450	7.16024		-1450	4.587		-1450	4.61787		-1450	4.62272
	-1440	7.14395		-1440	7.0928		-1440	7.16263		-1440	4.58855		-1440	4.63258		-1440	4.63544
	-1430	7.10297		-1430	7.13972		-1430	7.15558		-1430	4.57265		-1430	4.65336		-1430	4.65181
	-1420	7.09084		-1420	7.05912		-1420	7.19098		-1420	4.57333		-1420	4.6342		-1420	4.63329
	-1410	7.10463		-1410	7.08993		-1410	7.18957		-1410	4.58116		-1410	4.62562		-1410	4.647
	-1400	7.05606		-1400	7.09048		-1400	7.21548		-1400	4.57877		-1400	4.6435		-1400	4.63417
	-1390	7.11847		-1390	7.14652		-1390	7.20611		-1390	4.62499		-1390	4.63492		-1390	4.63838
	-1380	7.13739		-1380	7.10316		-1380	7.18933		-1380	4.63516		-1380	4.59638		-1380	4.62884
	-1370	7.12667		-1370	7.12888		-1370	7.23686		-1370	4.61843		-1370	4.59661		-1370	4.63234
	-1360	7.06157		-1360	7.1328		-1360	7.20623		-1360	4.58167		-1360	4.61048		-1360	4.62673
	-1350	7.15693		-1350	7.15246		-1350	7.21609		-1350	4.63003		-1350	4.58986		-1350	4.629
	-1340	7.11228		-1340	7.15803		-1340	7.22626		-1340	4.59598		-1340	4.58032		-1340	4.61775
	-1330	7.17512		-1330	7.16477		-1330	7.20495		-1330	4.59153		-1330	4.59435		-1330	4.63095
	-1320	7.11638		-1320	7.13513		-1320	7.172		-1320	4.60253		-1320	4.60544		-1320	4.63003
	-1310	7.18553		-1310	7.15197		-1310	7.22926		-1310	4.61005		-1310	4.59423		-1310	4.65185
	-1300	7.12012		-1300	7.1418		-1300	7.1527		-1300	4.57953		-1300	4.61712		-1300	4.62284
	-1290	7.16569		-1290	7.08233		-1290	7.14946		-1290	4.58175		-1290	4.61012		-1290	4.64895
	-1280	7.16385		-1280	7.10689		-1280	7.19784		-1280	4.58561		-1280	4.60746		-1280	4.65523
	-1270	7.15099		-1270	7.09434		-1270	7.17469		-1270	4.57532		-1270	4.61855		-1270	4.64525
	-1260	7.14156		-1260	7.06867		-1260	7.18523		-1260	4.58632		-1260	4.64569		-1260	4.64056
	-1250	7.13635		-1250	7.09048		-1250	7.20593		-1250	4.59447		-1250	4.62566		-1250	4.62379
	-1240	7.15013		-1240	7.10554		-1240	7.18412		-1240	4.62733		-1240	4.64982		-1240	4.62018
	-1230	7.14021		-1230	7.08858		-1230	7.22448		-1230	4.60432		-1230	4.6377		-1230	4.63476
	-1220	7.11412		-1220	7.11455		-1220	7.19564		-1220	4.59522		-1220	4.62022		-1220	4.61473
	-1210	7.10285		-1210	7.12226		-1210	7.22357		-1210	4.62558		-1210	4.6017		-1210	4.62689
	-1200	7.14964		-1200	7.14603		-1200	7.16569		-1200	4.65574		-1200	4.59439		-1200	4.60472
	-1190	7.12765		-1190	7.17402		-1190	7.17524		-1190	4.59951		-1190	4.58136		-1190	4.59463
	-1180	7.11681		-1180	7.17904		-1180	7.22504		-1180	4.62236		-1180	4.58585		-1180	4.64271
	-1170	7.17095		-1170	7.15828		-1170	7.19043		-1170	4.60869		-1170	4.59196		-1170	4.63091
	-1160	7.12704		-1160	7.19355		-1160	7.20893		-1160	4.62252		-1160	4.58827		-1160	4.63683
	-1150	7.18198		-1150	7.15583		-1150	7.14946		-1150	4.5862		-1150	4.59081		-1150	4.62673
	-1140	7.13831		-1140	7.10463		-1140	7.19288		-1140	4.57218		-1140	4.59018		-1140	4.65745
	-1130	7.21174		-1130	7.07706		-1130	7.14303		-1130	4.57508		-1130	4.59272		-1130	4.61819
	-1120	7.15638		-1120	7.10561		-1120	7.14713		-1120	4.55759		-1120	4.62666		-1120	4.63269
	-1110	7.23202		-1110	7.04779		-1110	7.14768		-1110	4.57476		-1110	4.63254		-1110	4.64915
	-1100	7.17438		-1100	7.07657		-1100	7.19723		-1100	4.59693		-1100	4.63854		-1100	4.65574
	-1090	7.17108		-1090	7.09948		-1090	7.19864		-1090	4.58517		-1090	4.62395		-1090	4.64219
	-1080	7.16195		-1080	7.05091		-1080	7.17879		-1080	4.59061		-1080	4.63528		-1080	4.64235
	-1070	7.11743		-1070	7.06408		-1070	7.20366		-1070	4.60452		-1070	4.63683		-1070	4.63917
	-1060	7.13966		-1060	7.10867		-1060	7.21646		-1060	4.62189		-1060	4.61668		-1060	4.61585
	-1050	7.14266		-1050	7.08619		-1050	7.22259		-1050	4.64323		-1050	4.58124		-1050	4.63269
	-1040	7.11883		-1040	7.10818		-1040	7.17696		-1040	4.63873		-1040	4.60194		-1040	4.60317
	-1030	7.13065		-1030	7.19221		-1030	7.22724		-1030	4.62848		-1030	4.58259		-1030	4.62375
	-1020	7.12906		-1020	7.14891		-1020	7.22448		-1020	4.61458		-1020	4.57683		-1020	4.62375
	-1010	7.20054		-1010	7.17004		-1010	7.19784		-1010	4.61549		-1010	4.55457		-1010	4.62248
	-1000	7.13231		-1000	7.17977		-1000	7.18853		-1000	4.60234		-1000	4.59002		-1000	4.6503
	-990	7.19086		-990	7.1396		-990	7.17592		-990	4.60619		-990	4.57476		-990	4.63885
	-980	7.18737		-980	7.14211		-980	7.17604		-980	4.58807		-980	4.60484		-980	4.64593
	-970	7.17389		-970	7.10334		-970	7.17481		-970	4.55731		-970	4.60075		-970	4.65431
	-960	7.1682		-960	7.12239		-960	7.19043		-960	4.55437		-960	4.61422		-960	4.66206
	-950	7.15013		-950	7.0718		-950	7.15148		-950	4.5628		-950	4.6441		-950	4.6565
	-940	7.16857		-940	7.03566		-940	7.14707		-940	4.59169		-940	4.64378		-940	4.6286
	-930	7.1606		-930	7.08448		-930	7.16673		-930	4.56733		-930	4.64847		-930	4.64326
	-920	7.12502		-920	7.05863		-920	7.20923		-920	4.59419		-920	4.65753		-920	4.63933
	-910	7.11608		-910	7.06071		-910	7.16844		-910	4.60007		-910	4.63766		-910	4.62542
	-900	7.11075		-900	7.09881		-900	7.18198		-900	4.63631		-900	4.62936		-900	4.62165
	-890	7.12116		-890	7.13139		-890	7.24445		-890	4.63134		-890	4.63075		-890	4.62964
	-880	7.10738		-880	7.11406		-880	7.17916		-880	4.62534		-880	4.58652		-880	4.61239
	-870	7.09189		-870	7.16122		-870	7.21211		-870	4.64299		-870	4.57659		-870	4.60945
	-860	7.0819		-860	7.19172		-860	7.16446		-860	4.62689		-860	4.56816		-860	4.61271
	-850	7.10799		-850	7.20195		-850	7.22779		-850	4.60762		-850	4.5709		-850	4.63158
	-840	7.11314		-840	7.19625		-840	7.18547		-840	4.60742		-840	4.57452		-840	4.63722
	-830	7.12655		-830	7.12845		-830	7.1976		-830	4.59292		-830	4.58104		-830	4.64013
	-820	7.15197		-820	7.16189		-820	7.17114		-820	4.57222		-820	4.56208		-820	4.66568
	-810	7.20801		-810	7.12128		-810	7.18308		-810	4.55954		-810	4.59963		-810	4.67843
	-800	7.17432		-800	7.05992		-800	7.15423		-800	4.53768		-800	4.59558		-800	4.65987
	-790	7.17536		-790	7.08619		-790	7.16924		-790	4.57381		-790	4.6584		-790	4.66508
	-780	7.17996		-780	7.04803		-780	7.14358		-780	4.56713		-780	4.66031		-780	4.65749
	-770	7.18088		-770	7.04644		-770	7.18859		-770	4.58918		-770	4.68717		-770	4.64116
	-760	7.14388		-760	7.03101		-760	7.20862		-760	4.59693		-760	4.66786		-760	4.64501
	-750	7.14897		-750	7.08264		-750	7.21499		-750	4.62435		-750	4.64569		-750	4.62975
	-740	7.12061		-740	7.06255		-740	7.19123		-740	4.61942		-740	4.63476		-740	4.62487
	-730	7.08203		-730	7.09893		-730	7.21946		-730	4.62904		-730	4.62344		-730	4.6073
	-720	7.13519		-720	7.13813		-720	7.24041		-720	4.65523		-720	4.60528		-720	4.59002
	-710	7.09293		-710	7.1832		-710	7.22767		-710	4.65304		-710	4.59689		-710	4.60718
	-700	7.12465		-700	7.18039		-700	7.27207		-700	4.63436		-700	4.56598		-700	4.64847
	-690	7.12331		-690	7.20323		-690	7.22032		-690	4.62411		-690	4.53772		-690	4.6071
	-680	7.15203		-680	7.18222		-680	7.2243		-680	4.63226		-680	4.56955		-680	4.62451
	-670	7.15926		-670	7.18884		-670	7.19968		-670	4.60238		-670	4.56216		-670	4.63039
	-660	7.19331		-660	7.21524		-660	7.16256		-660	4.57869		-660	4.60416		-660	4.62932
	-650	7.18682		-650	7.15276		-650	7.15809		-650	4.574		-650	4.59757		-650	4.65058
	-640	7.21028		-640	7.11197		-640	7.1682		-640	4.5473		-640	4.61883		-640	4.66282
	-630	7.18994		-630	7.07608		-630	7.16985		-630	4.56673		-630	4.66381		-630	4.64239
	-620	7.21897		-620	7.05036		-620	7.16765		-620	4.56316		-620	4.65586		-620	4.64569
	-610	7.19662		-610	7.01337		-610	7.24972		-610	4.58243		-610	4.66901		-610	4.66178
	-600	7.16887		-600	7.03254		-600	7.21811		-600	4.58648		-600	4.70136		-600	4.62844
	-590	7.10383		-590	7.06151		-590	7.21493		-590	4.59721		-590	4.67223		-590	4.59975
	-580	7.08527		-580	7.04234		-580	7.23569		-580	4.62646		-580	4.67462		-580	4.60313
	-570	7.05165		-570	7.10714		-570	7.25829		-570	4.63695		-570	4.63353		-570	4.58239
	-560	7.01784		-560	7.12306		-560	7.27403		-560	4.62081		-560	4.62578		-560	4.57977
	-550	7.02788		-550	7.2096		-550	7.27893		-550	4.65789		-550	4.59721		-550	4.5866
	-540	7.06053		-540	7.2107		-540	7.29222		-540	4.65817		-540	4.55672		-540	4.60055
	-530	7.05863		-530	7.2175		-530	7.27036		-530	4.64942		-530	4.54492		-530	4.61454
	-520	7.10438		-520	7.23098		-520	7.24408		-520	4.62149		-520	4.55044		-520	4.62364
	-510	7.0797		-510	7.20599		-510	7.24684		-510	4.57063		-510	4.53447		-510	4.63905
	-500	7.13831		-500	7.22167		-500	7.20048		-500	4.57023		-500	4.56959		-500	4.63448
	-490	7.21848		-490	7.17193		-490	7.18719		-490	4.56085		-490	4.60667		-490	4.67378
	-480	7.23269		-480	7.14823		-480	7.15999		-480	4.5709		-480	4.63019		-480	4.6617
	-470	7.21401		-470	7.08356		-470	7.14045		-470	4.5562		-470	4.66111		-470	4.68694
	-460	7.22608		-460	7.03493		-460	7.19159		-460	4.56331		-460	4.68642		-460	4.68197
	-450	7.22614		-450	6.99187		-450	7.18645		-450	4.57134		-450	4.68284		-450	4.65558
	-440	7.14885		-440	6.98624		-440	7.25498		-440	4.59359		-440	4.69929		-440	4.62952
	-430	7.1241		-430	7.02488		-430	7.37974		-430	4.6044		-430	4.70108		-430	4.61946
	-420	7.09354		-420	7.0454		-420	7.55454		-420	4.60595		-420	4.69552		-420	4.611
	-410	7.07804		-410	7.04491		-410	7.63992		-410	4.65209		-410	4.65081		-410	4.53085
	-400	7.03805		-400	7.13929		-400	7.81569		-400	4.66055		-400	4.63365		-400	4.50868
	-390	7.07063		-390	7.18915		-390	8.0055		-390	4.67931		-390	4.5922		-390	4.50637
	-380	7.07823		-380	7.22179		-380	8.11745		-380	4.67116		-380	4.56169		-380	4.43834
	-370	7.11534		-370	7.30123		-370	8.3519		-370	4.66242		-370	4.53518		-370	4.4269
	-360	7.07584		-360	7.26527		-360	8.62359		-360	4.62379		-360	4.52338		-360	4.42853
	-350	7.15926		-350	7.25474		-350	8.88224		-350	4.62765		-350	4.50284		-350	4.38923
	-340	7.19747		-340	7.26093		-340	9.21321		-340	4.57798		-340	4.55588		-340	4.35859
	-330	7.21021		-330	7.22148		-330	9.50088		-330	4.52815		-330	4.54984		-330	4.31413
	-320	7.24653		-320	7.11308		-320	9.73852		-320	4.52958		-320	4.61211		-320	4.31444
	-310	7.26013		-310	7.0269		-310	9.95962		-310	4.5078		-310	4.67315		-310	4.31401
	-300	7.24843		-300	7.01857		-300	10.1269		-300	4.51245		-300	4.74205		-300	4.28409
	-290	7.17769		-290	6.93718		-290	10.3184		-290	4.53951		-290	4.7527		-290	4.28027
	-280	7.22467		-280	6.92346		-280	10.4152		-280	4.58306		-280	4.77428		-280	4.21618
	-270	7.16734		-270	6.95531		-270	10.6694		-270	4.62288		-270	4.75743		-270	4.20763
	-260	7.10701		-260	7.06543		-260	10.9042		-260	4.65662		-260	4.74066		-260	4.16325
	-250	7.03977		-250	7.23318		-250	11.1536		-250	4.68368		-250	4.69894		-250	4.11334
	-240	6.97203		-240	7.56391		-240	11.4432		-240	4.7039		-240	4.58994		-240	4.0895
	-230	6.97864		-230	8.20173		-230	11.7595		-230	4.73041		-230	4.53888		-230	4.05516
	-220	6.99555		-220	9.08704		-220	12.1398		-220	4.77388		-220	4.43381		-220	3.99619
	-210	7.08215		-210	10.3378		-210	12.7151		-210	4.73732		-210	4.34631		-210	3.99143
	-200	7.24715		-200	11.879		-200	13.2966		-200	4.69099		-200	4.24538		-200	3.9435
	-190	7.54339		-190	13.4827		-190	13.813		-190	4.62062		-190	4.09502		-190	3.88724
	-180	8.04096		-180	14.9637		-180	14.3286		-180	4.54516		-180	3.99035		-180	3.81821
	-170	8.72783		-170	16.286		-170	14.7161		-170	4.47093		-170	3.91724		-170	3.80462
	-160	9.64389		-160	17.6839		-160	14.9674		-160	4.39749		-160	3.85243		-160	3.75459
	-150	10.8436		-150	18.9661		-150	15.1361		-150	4.30471		-150	3.85036		-150	3.75932
	-140	12.2911		-140	19.6381		-140	15.0769		-140	4.25977		-140	3.82715		-140	3.75773
	-130	14.0761		-130	19.5349		-130	14.8929		-130	4.20823		-130	3.82954		-130	3.78007
	-120	16.014		-120	19.0831		-120	14.7014		-120	4.16106		-120	3.78102		-120	3.78058
	-110	17.6642		-110	18.4047		-110	14.606		-110	4.15486		-110	3.80502		-110	3.77049
	-100	19.028		-100	17.5306		-100	14.5053		-100	4.09903		-100	3.81837		-100	3.75607
	-90	20.2242		-90	16.8401		-90	14.4442		-90	4.06851		-90	3.91		-90	3.74307
	-80	21.0473		-80	16.2914		-80	14.5058		-80	4.0734		-80	3.93627		-80	3.74871
	-70	20.8716		-70	15.9178		-70	14.8526		-70	4.08747		-70	3.94322		-70	3.73938
	-60	19.8144		-60	15.6876		-60	15.178		-60	4.05039		-60	3.93544		-60	3.7544
	-50	18.488		-50	15.8615		-50	15.2819		-50	4.05937		-50	3.9083		-50	3.74987
	-40	17.2466		-40	16.5658		-40	15.1495		-40	4.0976		-40	3.9011		-40	3.73544
	-30	16.1531		-30	17.2769		-30	15.0088		-30	4.12454		-30	3.8808		-30	3.74176
	-20	15.197		-20	17.8095		-20	14.9616		-20	4.13468		-20	3.87694		-20	3.78845
	-10	14.8288		-10	18.1721		-10	14.5234		-10	4.10642		-10	3.87063		-10	3.81225
	0	15.0066		0	18.3674		0	13.9415		0	4.1123		0	3.89467		0	3.88195
	10	15.9777		10	17.852		10	13.2561		10	4.10229		10	3.88755		10	3.959
	20	17.6484		20	16.9227		20	12.5262		20	4.12371		20	3.90941		20	4.0277
	30	19.312		30	15.9006		30	11.7611		30	4.11576		30	3.94076		30	4.08969
	40	19.9594		40	14.638		40	11.0402		40	4.09267		40	4.0312		40	4.15578
	50	19.8709		50	13.1787		50	10.408		50	4.06911		50	4.10857		50	4.23247
	60	19.9504		60	11.6735		60	9.82518		60	4.11103		60	4.19293		60	4.31119
	70	19.6123		70	10.3229		70	9.48282		70	4.15697		70	4.29219		70	4.41955
	80	17.8204		80	9.27513		80	9.11699		80	4.19027		80	4.35875		80	4.45261
	90	15.4269		90	8.45523		90	8.73537		90	4.18288		90	4.45507		90	4.52731
	100	13.4231		100	8.0006		100	8.36458		100	4.21498		100	4.53665		100	4.55743
	110	11.8992		110	7.65523		110	8.06264		110	4.29187		110	4.59391		110	4.56745
	120	10.372		120	7.47951		120	7.89923		120	4.36749		120	4.67211		120	4.60234
	130	9.03498		130	7.39671		130	7.68138		130	4.3928		130	4.74161		130	4.64291
	140	8.08401		140	7.37092		140	7.48111		140	4.4718		140	4.74519		140	4.61867
	150	7.57885		150	7.46236		150	7.3395		150	4.53411		150	4.73414		150	4.61505
	160	7.29596		160	7.50658		160	7.30931		160	4.60357		160	4.70029		160	4.60857
	170	7.10162		170	7.5565		170	7.27477		170	4.67795		170	4.67446		170	4.60238
	180	7.02464		180	7.60384		180	7.26117		180	4.7045		180	4.65089		180	4.60619
	190	7.00577		190	7.51657		190	7.28236		190	4.74622		190	4.60472		190	4.60905
	200	6.99824		200	7.50456		200	7.27164		200	4.76299		200	4.54011		200	4.5922
	210	7.03983		210	7.54382		210	7.27814		210	4.75095		210	4.51527		210	4.62669
	220	7.09225		220	7.5734		220	7.26785		220	4.74602		220	4.50709		220	4.6282
	230	7.16397		230	7.60035		230	7.24855		230	4.68105		230	4.48082		230	4.62371
	240	7.23202		240	7.62216		240	7.25376		240	4.63726		240	4.49346		240	4.63432
	250	7.27746		250	7.64133		250	7.2322		250	4.59888		250	4.49898		250	4.66349
	260	7.37031		260	7.67324		260	7.21462		260	4.52855		260	4.53912		260	4.66798
	270	7.41325		270	7.68646		270	7.1584		270	4.502		270	4.56184		270	4.64736
	280	7.45808		280	7.66092		280	7.16838		280	4.4997		280	4.61374		280	4.67275
	290	7.50383		290	7.59925		290	7.17769		290	4.49703		290	4.6236		290	4.64474
	300	7.55975		300	7.56924		300	7.17059		300	4.52409		300	4.64835		300	4.64815
	310	7.55001		310	7.53384		310	7.18694		310	4.51782		310	4.66572		310	4.6445
	320	7.57298		320	7.42739		320	7.17702		320	4.56745		320	4.66627		320	4.62507
	330	7.60243		330	7.39652		330	7.19502		330	4.57166		330	4.65511		330	4.6203
	340	7.64525		340	7.40461		340	7.2409		340	4.61525		340	4.64295		340	4.62427
	350	7.72921		350	7.35188		350	7.21811		350	4.65475		350	4.6106		350	4.60933
	360	7.74079		360	7.33791		360	7.24298		360	4.63532		360	4.58116		360	4.59892
	370	7.77748		370	7.3245		370	7.25247		370	4.67386		370	4.51726		370	4.61545
	380	7.71507		380	7.39156		380	7.23735		380	4.61279		380	4.54086		380	4.60242
	390	7.67991		390	7.34814		390	7.22853		390	4.61299		390	4.54269		390	4.61736
	400	7.60011		400	7.33099		400	7.25388		400	4.57353		400	4.51392		400	4.63953
	410	7.53451		410	7.29455		410	7.21101		410	4.56145		410	4.54869		410	4.64696
	420	7.47278		420	7.30392		420	7.17824		420	4.54368		420	4.58104		420	4.62431
	430	7.46175		430	7.32401		430	7.19196		430	4.52437		430	4.61656		430	4.65678
	440	7.46304		440	7.28248		440	7.23306		440	4.55016		440	4.6445		440	4.69639
	450	7.41227		450	7.25302		450	7.23906		450	4.52751		450	4.65383		450	4.64843
	460	7.38054		460	7.30655		460	7.21113		460	4.55322		460	4.6954		460	4.65189
	470	7.32799		470	7.2232		470	7.25713		470	4.56872		470	4.6737		470	4.62805
	480	7.24868		480	7.27526		480	7.29633		480	4.56033		480	4.67382		480	4.63456
	490	7.27501		490	7.24586		490	7.34961		490	4.61402		490	4.66568		490	4.61974
	500	7.20629		500	7.27997		500	7.33289		500	4.63262		500	4.62642		500	4.60496
	510	7.1614		510	7.34943		510	7.39144		510	4.64036		510	4.6433		510	4.62161
	520	7.08907		520	7.36272		520	7.31396		520	4.63055		520	4.55847		520	4.59761
	530	7.20862		530	7.38789		530	7.30815		530	4.69898		530	4.55604		530	4.60003
	540	7.17328		540	7.38299		540	7.31286		540	4.68038		540	4.55918		540	4.6255
	550	7.16483		550	7.37031		550	7.31384		550	4.64291		550	4.52866		550	4.61787
	560	7.13568		560	7.34459		560	7.24733		560	4.58922		560	4.53943		560	4.62065
	570	7.18939		570	7.33528		570	7.21689		570	4.60281		570	4.55453		570	4.63973
	580	7.2322		580	7.25027		580	7.19374		580	4.59737		580	4.58267		580	4.63826
	590	7.22185		590	7.23624		590	7.18817		590	4.57631		590	4.59216		590	4.64815
	600	7.21628		600	7.21034		600	7.21701		600	4.5446		600	4.63699		600	4.65292
	610	7.21769		610	7.18578		610	7.21536		610	4.56657		610	4.67295		610	4.66119
	620	7.24004		620	7.10322		620	7.16575		620	4.56955		620	4.62868		620	4.65697
	630	7.175		630	7.1339		630	7.16893		630	4.56653		630	4.66631		630	4.62828
	640	7.12796		640	7.12772		640	7.18755		640	4.56288		640	4.67319		640	4.63742
	650	7.13715		650	7.14064		650	7.2044		650	4.58863		650	4.67656		650	4.61513
	660	7.03119		660	7.15601		660	7.21548		660	4.62276		660	4.64148		660	4.61422
	670	7.05716		670	7.1723		670	7.22314		670	4.63043		670	4.64231		670	4.62367
	680	7.0476		680	7.19313		680	7.2518		680	4.65984		680	4.61314		680	4.6203
	690	7.00859		690	7.18131		690	7.26558		690	4.66158		690	4.60051		690	4.63186
	700	7.07449		700	7.22338		700	7.21046		700	4.66448		700	4.56884		700	4.61847
	710	7.04246		710	7.22191		710	7.21566		710	4.63631		710	4.56268		710	4.62626
	720	7.03395		720	7.20188		720	7.20041		720	4.62014		720	4.56673		720	4.60571
	730	7.12214		730	7.19533		730	7.18253		730	4.61891		730	4.57094		730	4.66055
	740	7.1015		740	7.16667		740	7.18608		740	4.59002		740	4.57837		740	4.63695
	750	7.17389		750	7.12416		750	7.1644		750	4.57647		750	4.59069		750	4.62503
	760	7.12582		760	7.11755		760	7.18376		760	4.56085		760	4.61775		760	4.64712
	770	7.15515		770	7.12043		770	7.17328		770	4.57464		770	4.64235		770	4.65534
	780	7.17126		780	7.08258		780	7.15644		780	4.56117		780	4.67875		780	4.6499
	790	7.13911		790	7.05453		790	7.15117		790	4.5506		790	4.66138		790	4.63516
	800	7.1298		800	7.0966		800	7.18351		800	4.59725		800	4.67354		800	4.62272
	810	7.12239		810	7.04932		810	7.21242		810	4.60027		810	4.65896		810	4.62753
	820	7.09801		820	7.02231		820	7.17622		820	4.6133		820	4.65674		820	4.64279
	830	7.05171		830	7.10309		830	7.25358		830	4.59208		830	4.63993		830	4.62757
	840	7.02501		840	7.12545		840	7.23012		840	4.64557		840	4.62479		840	4.62189
	850	7.06304		850	7.1241		850	7.23465		850	4.64974		850	4.60091		850	4.61032
	860	7.00963		860	7.15962		860	7.20005		860	4.66301		860	4.57675		860	4.60424
	870	7.05355		870	7.19472		870	7.18026		870	4.63838		870	4.58143		870	4.62956
	880	7.05581		880	7.16085		880	7.20244		880	4.6199		880	4.56562		880	4.63985
	890	7.10058		890	7.19472		890	7.15822		890	4.60691		890	4.56681		890	4.62101
	900	7.08478		900	7.18467		900	7.20636		900	4.587		900	4.60536		900	4.63484
	910	7.1369		910	7.14101		910	7.187		910	4.60067		910	4.59578		910	4.64116
	920	7.1347		920	7.15742		920	7.16048		920	4.55998		920	4.63051		920	4.62785
	930	7.17218		930	7.10144		930	7.17677		930	4.58322		930	4.64021		930	4.63194
	940	7.15105		940	7.09274		940	7.2172		940	4.57464		940	4.63945		940	4.69035
	950	7.13072		950	7.01557		950	7.21628		950	4.5717		950	4.62769		950	4.66138
	960	7.13323		960	7.05998		960	7.20764		960	4.58513		960	4.66238		960	4.63965
	970	7.16403		970	7.071		970	7.21187		970	4.61235		970	4.65511		970	4.63293
	980	7.09476		980	7.06916		980	7.22534		980	4.61108		980	4.64203		980	4.63285
	990	7.04044		990	7.1045		990	7.21266		990	4.60595		990	4.64716		990	4.61732
	1000	7.05949		1000	7.10444		1000	7.21934		1000	4.64239		1000	4.60361		1000	4.62586
	1010	7.04191		1010	7.13886		1010	7.25505		1010	4.61104		1010	4.6373		1010	4.62224
	1020	7.02684		1020	7.15203		1020	7.24708		1020	4.63722		1020	4.60544		1020	4.65308
	1030	7.04117		1030	7.14272		1030	7.21291		1030	4.60854		1030	4.58676		1030	4.62538
	1040	7.0672		1040	7.16526		1040	7.19215		1040	4.61422		1040	4.58529		1040	4.611
	1050	7.0974		1050	7.20599		1050	7.18382		1050	4.61962		1050	4.60957		1050	4.6197
	1060	7.0835		1060	7.14088		1060	7.21591		1060	4.61819		1060	4.5744		1060	4.64899
	1070	7.12661		1070	7.1113		1070	7.17212		1070	4.59705		1070	4.56812		1070	4.6342
	1080	7.135		1080	7.1415		1080	7.18884		1080	4.59987		1080	4.59777		1080	4.65153
	1090	7.12949		1090	7.09244		1090	7.16673		1090	4.56554		1090	4.60083		1090	4.63293
	1100	7.11381		1100	7.08435		1100	7.18461		1100	4.56077		1100	4.6379		1100	4.63607
	1110	7.13923		1110	7.07039		1110	7.2025		1110	4.59288		1110	4.66643		1110	4.6476
	1120	7.11375		1120	7.07639		1120	7.16795		1120	4.58465		1120	4.65936		1120	4.62324
	1130	7.15981		1130	7.06892		1130	7.20299		1130	4.61235		1130	4.64406		1130	4.64207
	1140	7.10665		1140	7.07523		1140	7.20807		1140	4.59574		1140	4.62983		1140	4.61803
	1150	7.11302		1150	7.05459		1150	7.20274		1150	4.62344		1150	4.60106		1150	4.60754
	1160	7.07376		1160	7.07731		1160	7.22718		1160	4.62507		1160	4.61481		1160	4.61446
	1170	7.03456		1170	7.12778		1170	7.2104		1170	4.62741		1170	4.63138		1170	4.62467
	1180	7.10628		1180	7.13439		1180	7.23575		1180	4.66258		1180	4.58779		1180	4.6263
	1190	7.08307		1190	7.10414		1190	7.22399		1190	4.63671		1190	4.5709		1190	4.63142
	1200	7.11577		1200	7.15485		1200	7.18253		1200	4.64811		1200	4.58696		1200	4.60114
	1210	7.10628		1210	7.19576		1210	7.20397		1210	4.63623		1210	4.5893		1210	4.63456
	1220	7.11063		1220	7.15001		1220	7.18633		1220	4.62236		1220	4.60238		1220	4.62626
	1230	7.09954		1230	7.15258		1230	7.15105		1230	4.59153		1230	4.61903		1230	4.62153
	1240	7.13482		1240	7.15846		1240	7.20121		1240	4.59928		1240	4.64215		1240	4.63941
	1250	7.17671		1250	7.13696		1250	7.16942		1250	4.59236		1250	4.62304		1250	4.65781
	1260	7.12141		1260	7.12269		1260	7.2028		1260	4.58493		1260	4.64179		1260	4.63269
	1270	7.14676		1270	7.04399		1270	7.18143		1270	4.58954		1270	4.61899		1270	4.63631
	1280	7.11841		1280	7.09893		1280	7.18633		1280	4.57611		1280	4.63937		1280	4.64402
	1290	7.08662		1290	7.06984		1290	7.21009		1290	4.58195		1290	4.64267		1290	4.61481
	1300	7.10775		1300	7.08233		1300	7.19943		1300	4.60889		1300	4.63663		1300	4.64938
	1310	7.08294		1310	7.1151		1310	7.18682		1310	4.62439		1310	4.65213		1310	4.61501
	1320	7.05845		1320	7.12955		1320	7.18755		1320	4.60456		1320	4.6416		1320	4.6373
	1330	7.06377		1330	7.1543		1330	7.1976		1330	4.62034		1330	4.62395		1330	4.62006
	1340	7.06708		1340	7.14505		1340	7.18823		1340	4.64402		1340	4.60587		1340	4.62709
	1350	7.09777		1350	7.14425		1350	7.14689		1350	4.63663		1350	4.61128		1350	4.62093
	1360	7.11914		1360	7.17512		1360	7.19913		1360	4.64243		1360	4.61295		1360	4.63126
	1370	7.07755		1370	7.12263		1370	7.22663		1370	4.60206		1370	4.59701		1370	4.63655
	1380	7.0797		1380	7.15938		1380	7.16422		1380	4.59936		1380	4.61426		1380	4.63818
	1390	7.12821		1390	7.13611		1390	7.17181		1390	4.61652		1390	4.58283		1390	4.6352
	1400	7.13788		1400	7.15809		1400	7.20587		1400	4.60404		1400	4.61795		1400	4.65534
	1410	7.11442		1410	7.12465		1410	7.17291		1410	4.59681		1410	4.62117		1410	4.64132
	1420	7.14878		1420	7.09752		1420	7.16618		1420	4.58275		1420	4.63067		1420	4.63746
	1430	7.13647		1430	7.09372		1430	7.15558		1430	4.60512		1430	4.62169		1430	4.64907
	1440	7.11669		1440	7.09176		1440	7.14915		1440	4.58012		1440	4.64235		1440	4.62681
	1450	7.11939		1450	7.11589		1450	7.12857		1450	4.5897		1450	4.65344		1450	4.62805
	1460	7.08288		1460	7.10401		1460	7.14088		1460	4.59606		1460	4.65336		1460	4.61529
	1470	7.08888		1470	7.1053		1470	7.15852		1470	4.61366		1470	4.62173		1470	4.63846
	1480	7.10701		1480	7.08803		1480	7.15956		1480	4.61942		1480	4.62622		1480	4.64132
	1490	7.10597		1490	7.12282		1490	7.1505		1490	4.65562		1490	4.61275		1490	4.61644
	1500	7.04558		1500	7.12337		1500	7.20121		1500	4.6197		1500	4.6162		1500	4.61716
	1510	7.07964		1510	7.1445		1510	7.18976		1510	4.61978		1510	4.60099		1510	4.63778
	1520	7.09458		1520	7.14493		1520	7.18608		1520	4.61128		1520	4.6236		1520	4.6313
	1530	7.08074		1530	7.11393		1530	7.18761		1530	4.6085		1530	4.57094		1530	4.63178
	1540	7.08558		1540	7.1486		1540	7.15515		1540	4.60567		1540	4.6048		1540	4.64307
	1550	7.10469		1550	7.13439		1550	7.1802		1550	4.61438		1550	4.61219		1550	4.61807
	1560	7.12741		1560	7.11681		1560	7.18988		1560	4.5926		1560	4.60957		1560	4.65403
	1570	7.14009		1570	7.11057		1570	7.15773		1570	4.6228		1570	4.58326		1570	4.64175
	1580	7.12888		1580	7.0928		1580	7.16416		1580	4.59363		1580	4.59781		1580	4.647
	1590	7.12882		1590	7.11179		1590	7.19888		1590	4.58553		1590	4.6282		1590	4.65439
	1600	7.09764		1600	7.08852		1600	7.19055		1600	4.57607		1600	4.63341		1600	4.63826
	1610	7.06482		1610	7.13898		1610	7.15038		1610	4.59673		1610	4.65892		1610	4.62932
	1620	7.09084		1620	7.09513		1620	7.18082		1620	4.59292		1620	4.63238		1620	4.62391
	1630	7.12906		1630	7.08564		1630	7.19251		1630	4.61914		1630	4.64827		1630	4.64263
	1640	7.05128		1640	7.10652		1640	7.19196		1640	4.5833		1640	4.61334		1640	4.64768
	1650	7.06922		1650	7.09434		1650	7.19515		1650	4.60607		1650	4.60587		1650	4.63826
	1660	7.06512		1660	7.12508		1660	7.17653		1660	4.6174		1660	4.60563		1660	4.64179
	1670	7.06267		1670	7.11596		1670	7.18725		1670	4.60174		1670	4.60293		1670	4.6197
	1680	7.08742		1680	7.17408		1680	7.20874		1680	4.63198		1680	4.62022		1680	4.65125
	1690	7.08839		1690	7.13243		1690	7.15528		1690	4.60703		1690	4.61748		1690	4.61652
	1700	7.06745		1700	7.17046		1700	7.19141		1700	4.60087		1700	4.62145		1700	4.6114
	1710	7.10426		1710	7.1105		1710	7.18314		1710	4.6013		1710	4.60957		1710	4.62662
	1720	7.11381		1720	7.12918		1720	7.16042		1720	4.60905		1720	4.60997		1720	4.61601
	1730	7.1072		1730	7.13292		1730	7.18161		1730	4.58831		1730	4.60349		1730	4.65562
	1740	7.10297		1740	7.13464		1740	7.178		1740	4.57607		1740	4.63687		1740	4.64386
	1750	7.13776		1750	7.12618		1750	7.13837		1750	4.61251		1750	4.60655		1750	4.62805
	1760	7.13782		1760	7.06255		1760	7.1818		1760	4.61724		1760	4.62658		1760	4.63862
	1770	7.12392		1770	7.09256		1770	7.18651		1770	4.58732		1770	4.6321		1770	4.64088
	1780	7.10738		1780	7.11167		1780	7.15031		1780	4.61175		1780	4.62967		1780	4.62654
	1790	7.08356		1790	7.0955		1790	7.18896		1790	4.6025		1790	4.61911		1790	4.64227
	1800	7.11167		1800	7.10879		1800	7.17536		1800	4.61271		1800	4.62272		1800	4.62936
	1810	7.10934		1810	7.08582		1810	7.18106		1810	4.64112		1810	4.60353		1810	4.63989
	1820	7.12814		1820	7.11847		1820	7.1889		1820	4.64144		1820	4.62634		1820	4.61974
	1830	7.06022		1830	7.16256		1830	7.14768		1830	4.58994		1830	4.61899		1830	4.63575
	1840	7.06592		1840	7.1527		1840	7.18633		1840	4.61096		1840	4.61644		1840	4.61835
	1850	7.12563		1850	7.11718		1850	7.18026		1850	4.62924		1850	4.59642		1850	4.63317
	1860	7.10401		1860	7.11706		1860	7.17757		1860	4.63401		1860	4.60599		1860	4.63277
	1870	7.0789		1870	7.12447		1870	7.18394		1870	4.59459		1870	4.59204		1870	4.63838
	1880	7.09752		1880	7.11534		1880	7.17322		1880	4.57631		1880	4.61303		1880	4.62383
	1890	7.09666		1890	7.10303		1890	7.17359		1890	4.61167		1890	4.59701		1890	4.62101
	1900	7.1061		1900	7.11896		1900	7.16348		1900	4.59856		1900	4.61362		1900	4.64183
	1910	7.11945		1910	7.11259		1910	7.16122		1910	4.59288		1910	4.6203		1910	4.61843
	1920	7.08227		1920	7.07682		1920	7.17169		1920	4.59653		1920	4.60484		1920	4.64036
	1930	7.1121		1930	7.09195		1930	7.16777		1930	4.57957		1930	4.61044		1930	4.62816
	1940	7.07896		1940	7.13194		1940	7.18045		1940	4.59761		1940	4.65006		1940	4.6381
	1950	7.10701		1950	7.07272		1950	7.20305		1950	4.61426		1950	4.62085		1950	4.65848
	1960	7.07915		1960	7.10248		1960	7.20862		1960	4.57611		1960	4.62717		1960	4.63293
	1970	7.10009		1970	7.1222		1970	7.19441		1970	4.62503		1970	4.60544		1970	4.64168
	1980	7.06034		1980	7.10554		1980	7.18565		1980	4.5903		1980	4.59789		1980	4.63901
	1990	7.10083		1990	7.12171		1990	7.15577		1990	4.60802		1990	4.61044		1990	4.60997
	2000	7.10303		2000	7.15442		2000	7.19245		2000	4.63401		2000	4.6385		2000	4.64013
	2010	7.11271		2010	7.16538		2010	7.13525		2010	4.62197		2010	4.6108		2010	4.6019
	2020	7.09795		2020	7.14033		2020	7.19417		2020	4.61497		2020	4.62439		2020	4.63079
	2030	7.05796		2030	7.13121		2030	7.21217		2030	4.60202		2030	4.61322		2030	4.64179
	2040	7.08937		2040	7.10022		2040	7.19172		2040	4.59451		2040	4.617		2040	4.63794
	2050	7.11565		2050	7.13911		2050	7.20574		2050	4.59212		2050	4.61907		2050	4.64239
	2060	7.09538		2060	7.11792		2060	7.17402		2060	4.5988		2060	4.60659		2060	4.63051
	2070	7.08141		2070	7.12545		2070	7.16256		2070	4.59518		2070	4.61529		2070	4.62367
	2080	7.11112		2080	7.11504		2080	7.1429		2080	4.60039		2080	4.60786		2080	4.63122
	2090	7.10248		2090	7.13905		2090	7.14627		2090	4.57071		2090	4.64724		2090	4.61156
	2100	7.07817		2100	7.10603		2100	7.1437		2100	4.58402		2100	4.62717		2100	4.63925
	2110	7.07602		2110	7.14241		2110	7.15626		2110	4.60631		2110	4.61382		2110	4.63158
	2120	7.09415		2120	7.11161		2120	7.19135		2120	4.59848		2120	4.62936		2120	4.63889
	2130	7.08705		2130	7.1083		2130	7.20721		2130	4.60218		2130	4.6265		2130	4.6718
	2140	7.09048		2140	7.11841		2140	7.13751		2140	4.62097		2140	4.61605		2140	4.63182
	2150	7.08423		2150	7.10205		2150	7.19374		2150	4.61692		2150	4.61624		2150	4.63564
	2160	7.06463		2160	7.09672		2160	7.17206		2160	4.57623		2160	4.59773		2160	4.64656
	2170	7.05232		2170	7.13163		2170	7.15815		2170	4.58231		2170	4.61326		2170	4.62729
	2180	7.08417		2180	7.12894		2180	7.16005		2180	4.59876		2180	4.61028		2180	4.62546
	2190	7.08791		2190	7.13862		2190	7.18584		2190	4.61159		2190	4.60114		2190	4.63174
	2200	7.07964		2200	7.12827		2200	7.2164		2200	4.59495		2200	4.6083		2200	4.65908
	2210	7.14021		2210	7.13555		2210	7.13629		2210	4.60389		2210	4.6081		2210	4.60587
	2220	7.06139		2220	7.12288		2220	7.18467		2220	4.58441		2220	4.62995		2220	4.6377
	2230	7.11332		2230	7.13317		2230	7.18388		2230	4.61287		2230	4.60933		2230	4.63202
	2240	7.1317		2240	7.12386		2240	7.13537		2240	4.60281		2240	4.61493		2240	4.64152
	2250	7.08876		2250	7.13519		2250	7.19257		2250	4.59542		2250	4.64112		2250	4.6565
	2260	7.08576		2260	7.12931		2260	7.19227		2260	4.58239		2260	4.59932		2260	4.64402
	2270	7.05985		2270	7.1464		2270	7.16844		2270	4.60444		2270	4.63738		2270	4.64636
	2280	7.09244		2280	7.13451		2280	7.1799		2280	4.5984		2280	4.62399		2280	4.63301
	2290	7.05777		2290	7.14082		2290	7.17879		2290	4.56808		2290	4.65105		2290	4.61545
	2300	7.07014		2300	7.14248		2300	7.20397		2300	4.58434		2300	4.63432		2300	4.6443
	2310	7.05263		2310	7.12606		2310	7.16165		2310	4.59558		2310	4.61911		2310	4.64521
	2320	7.13225		2320	7.12551		2320	7.15283		2320	4.6292		2320	4.58497		2320	4.61895
	2330	7.10071		2330	7.1622		2330	7.18088		2330	4.60067		2330	4.62737		2330	4.6286
	2340	7.12435		2340	7.15117		2340	7.15668		2340	4.60031		2340	4.62129		2340	4.62975
	2350	7.08919		2350	7.13439		2350	7.17322		2350	4.60583		2350	4.61589		2350	4.63111
	2360	7.08227		2360	7.11932		2360	7.16844		2360	4.62216		2360	4.59145		2360	4.65078
	2370	7.08294		2370	7.12006		2370	7.19533		2370	4.59832		2370	4.61148		2370	4.63186
	2380	7.07798		2380	7.13421		2380	7.16238		2380	4.58469		2380	4.6106		2380	4.64136
	2390	7.10334		2390	7.12288		2390	7.15472		2390	4.60198		2390	4.59808		2390	4.63842
	2400	7.10634		2400	7.10371		2400	7.20599		2400	4.59971		2400	4.60579		2400	4.66051
	2410	7.07131		2410	7.09648		2410	7.15895		2410	4.60142		2410	4.60802		2410	4.64168
	2420	7.11001		2420	7.15013		2420	7.15785		2420	4.59336		2420	4.62165		2420	4.64557
	2430	7.07792		2430	7.11841		2430	7.1478		2430	4.58696		2430	4.62618		2430	4.62483
	2440	7.08778		2440	7.1377		2440	7.16691		2440	4.58271		2440	4.62884		2440	4.64946
	2450	7.07902		2450	7.0797		2450	7.17028		2450	4.59526		2450	4.60965		2450	4.64283
	2460	7.06359		2460	7.114		2460	7.13941		2460	4.6048		2460	4.59463		2460	4.61803
	2470	7.12122		2470	7.14278		2470	7.18951		2470	4.61616		2470	4.61414		2470	4.63941
	2480	7.11559		2480	7.14499		2480	7.18131		2480	4.5955		2480	4.61911		2480	4.65944
	2490	7.09605		2490	7.1606		2490	7.17285		2490	4.61477		2490	4.64211		2490	4.61303
	2500	7.07296		2500	7.14358		2500	7.13457		2500	4.59816		2500	4.6203		2500	4.62765
	2510	7.10015		2510	7.15485		2510	7.15668		2510	4.60011		2510	4.6495		2510	4.62626
	2520	7.10267		2520	7.15907		2520	7.16011		2520	4.60285		2520	4.6205		2520	4.64183
	2530	7.10628		2530	7.12594		2530	7.18045		2530	4.61938		2530	4.59677		2530	4.64597
	2540	7.10701		2540	7.10487		2540	7.16299		2540	4.59812		2540	4.60965		2540	4.65093
	2550	7.06433		2550	7.09336		2550	7.16183		2550	4.60063		2550	4.5926		2550	4.62455
	2560	7.08631		2560	7.13396		2560	7.18351		2560	4.58875		2560	4.58998		2560	4.6292
	2570	7.11939		2570	7.12851		2570	7.10358		2570	4.59232		2570	4.61593		2570	4.62602
	2580	7.08588		2580	7.11234		2580	7.18908		2580	4.59129		2580	4.62427		2580	4.62455
	2590	7.08956		2590	7.12165		2590	7.19049		2590	4.60893		2590	4.60154		2590	4.64132

## Sheet: Sheet2
Caprin1, 480 mM NaCl
200K			220K			225K			200K			220K			225K
Z (angstorm)	[Cl-] (mg/ml)		Z (angstorm)	[Cl-] (mg/ml)		Z (angstorm)	[Cl-] (mg/ml)		Z (angstorm)	[Na+] (mg/ml)		Z (angstorm)	[Na+] (mg/ml)		Z (angstorm)	[Na+] (mg/ml)
-1080	16.9565		-1080	17.2416		-1080	17.2225		-1080	11.0018		-1080	11.1516		-1080	11.1471
-1070	17.0517		-1070	17.2077		-1070	17.2399		-1070	11.0261		-1070	11.1407		-1070	11.1405
-1060	16.9859		-1060	17.1791		-1060	17.2803		-1060	11.0085		-1060	11.1429		-1060	11.1403
-1050	16.9378		-1050	17.1622		-1050	17.1885		-1050	11.0296		-1050	11.1315		-1050	11.1306
-1040	17.0116		-1040	17.2398		-1040	17.2437		-1040	11.0153		-1040	11.1296		-1040	11.1256
-1030	16.984		-1030	17.1791		-1030	17.2219		-1030	10.9941		-1030	11.0971		-1030	11.1616
-1020	16.9713		-1020	17.147		-1020	17.2062		-1020	11.0397		-1020	11.1292		-1020	11.1229
-1010	16.9644		-1010	17.2021		-1010	17.2208		-1010	10.9893		-1010	11.1223		-1010	11.13
-1000	16.9578		-1000	17.2216		-1000	17.2226		-1000	11.0119		-1000	11.1182		-1000	11.1329
-990	16.9828		-990	17.1981		-990	17.2092		-990	11.018		-990	11.1332		-990	11.1296
-980	16.968		-980	17.2414		-980	17.226		-980	11.0035		-980	11.1284		-980	11.1489
-970	16.9443		-970	17.2363		-970	17.2224		-970	10.975		-970	11.1265		-970	11.1306
-960	16.9954		-960	17.1898		-960	17.2011		-960	11.0219		-960	11.1475		-960	11.1238
-950	16.9772		-950	17.1599		-950	17.2902		-950	11.0241		-950	11.0855		-950	11.1795
-940	16.9957		-940	17.1483		-940	17.2531		-940	11.0105		-940	11.0992		-940	11.1717
-930	16.9282		-930	17.212		-930	17.2352		-930	10.9998		-930	11.1221		-930	11.1496
-920	17.0095		-920	17.2233		-920	17.2398		-920	11.0122		-920	11.1129		-920	11.1332
-910	16.9566		-910	17.1259		-910	17.2559		-910	10.9951		-910	11.0998		-910	11.1412
-900	16.9612		-900	17.2122		-900	17.2236		-900	11.0143		-900	11.1116		-900	11.1626
-890	17.0159		-890	17.2245		-890	17.2151		-890	11.0214		-890	11.158		-890	11.1297
-880	16.9632		-880	17.255		-880	17.2134		-880	11.0138		-880	11.1221		-880	11.1218
-870	17.0147		-870	17.1926		-870	17.1513		-870	11.0301		-870	11.1247		-870	11.097
-860	16.9744		-860	17.1922		-860	17.2386		-860	11.0049		-860	11.1162		-860	11.1235
-850	16.977		-850	17.2214		-850	17.2091		-850	11.0146		-850	11.1387		-850	11.1236
-840	16.9801		-840	17.2279		-840	17.1876		-840	11.0202		-840	11.1365		-840	11.1185
-830	16.9523		-830	17.1498		-830	17.1992		-830	10.9887		-830	11.1115		-830	11.1369
-820	17.0234		-820	17.1764		-820	17.267		-820	11.0423		-820	11.1006		-820	11.1584
-810	16.9569		-810	17.1782		-810	17.1821		-810	10.9954		-810	11.1135		-810	11.1031
-800	16.9859		-800	17.121		-800	17.2389		-800	11.0165		-800	11.087		-800	11.155
-790	16.9704		-790	17.1946		-790	17.2226		-790	11.0022		-790	11.118		-790	11.1641
-780	16.9918		-780	17.1934		-780	17.2561		-780	11.0236		-780	11.1406		-780	11.1648
-770	16.9775		-770	17.1845		-770	17.2402		-770	10.9948		-770	11.1166		-770	11.1313
-760	16.9972		-760	17.2197		-760	17.2072		-760	11.0269		-760	11.1476		-760	11.1352
-750	16.9966		-750	17.1774		-750	17.2242		-750	11.0267		-750	11.129		-750	11.1156
-740	16.97		-740	17.1816		-740	17.2634		-740	11.0192		-740	11.1208		-740	11.1795
-730	16.9602		-730	17.1442		-730	17.2317		-730	10.9951		-730	11.1034		-730	11.1456
-720	17.0265		-720	17.1175		-720	17.2011		-720	11.0183		-720	11.0961		-720	11.1163
-710	17.0208		-710	17.1996		-710	17.2722		-710	11.0326		-710	11.1336		-710	11.1526
-700	16.9572		-700	17.1606		-700	17.2384		-700	11.0328		-700	11.0955		-700	11.1245
-690	16.9877		-690	17.1006		-690	17.2139		-690	11.0116		-690	11.0889		-690	11.1589
-680	16.9955		-680	17.1343		-680	17.265		-680	11.0262		-680	11.1118		-680	11.148
-670	16.9881		-670	17.1957		-670	17.2759		-670	11.0315		-670	11.1356		-670	11.1601
-660	17.0273		-660	17.1342		-660	17.2461		-660	11.0115		-660	11.0994		-660	11.1429
-650	16.95		-650	17.2015		-650	17.2836		-650	11.0066		-650	11.136		-650	11.1621
-640	17.0178		-640	17.1518		-640	17.2019		-640	11.0437		-640	11.1282		-640	11.1569
-630	17.0118		-630	17.1522		-630	17.2197		-630	11.0214		-630	11.1011		-630	11.1226
-620	16.9938		-620	17.1811		-620	17.185		-620	11.0054		-620	11.1124		-620	11.1129
-610	17.0023		-610	17.2237		-610	17.2842		-610	11.0344		-610	11.1681		-610	11.1722
-600	17.0184		-600	17.1406		-600	17.1908		-600	11.0629		-600	11.1301		-600	11.1392
-590	17.0482		-590	17.1636		-590	17.2395		-590	11.0412		-590	11.08		-590	11.1407
-580	16.9939		-580	17.1881		-580	17.2192		-580	11.025		-580	11.1267		-580	11.1354
-570	16.9925		-570	17.2265		-570	17.2445		-570	11.0173		-570	11.1316		-570	11.1468
-560	16.9607		-560	17.1674		-560	17.2091		-560	10.9836		-560	11.1154		-560	11.1344
-550	16.9644		-550	17.1897		-550	17.2069		-550	11.0125		-550	11.12		-550	11.139
-540	16.9323		-540	17.1869		-540	17.2262		-540	10.9798		-540	11.1242		-540	11.1166
-530	16.9574		-530	17.2115		-530	17.2591		-530	11.0293		-530	11.1085		-530	11.1544
-520	16.9743		-520	17.2656		-520	17.2047		-520	11.001		-520	11.1401		-520	11.1561
-510	17.0578		-510	17.1715		-510	17.2765		-510	11.0326		-510	11.1158		-510	11.1407
-500	16.9495		-500	17.2244		-500	17.2463		-500	11.0015		-500	11.1038		-500	11.157
-490	17.0024		-490	17.2209		-490	17.2294		-490	11.0251		-490	11.1311		-490	11.1354
-480	16.9651		-480	17.1385		-480	17.1494		-480	11.0256		-480	11.0879		-480	11.1244
-470	16.9996		-470	17.1719		-470	17.241		-470	10.9882		-470	11.098		-470	11.1361
-460	16.9969		-460	17.2278		-460	17.2821		-460	11.0506		-460	11.1287		-460	11.1202
-450	16.949		-450	17.2248		-450	17.2172		-450	10.996		-450	11.131		-450	11.1723
-440	16.9843		-440	17.1202		-440	17.2174		-440	11.0045		-440	11.0904		-440	11.1465
-430	17.0437		-430	17.1847		-430	17.2774		-430	11.0628		-430	11.0944		-430	11.1433
-420	17.0149		-420	17.1824		-420	17.2038		-420	11.0396		-420	11.1364		-420	11.1292
-410	16.9808		-410	17.1208		-410	17.1825		-410	10.9851		-410	11.0948		-410	11.119
-400	17.0298		-400	17.1982		-400	17.2263		-400	11.0342		-400	11.1206		-400	11.1534
-390	16.9686		-390	17.1936		-390	17.2043		-390	11.0352		-390	11.1209		-390	11.1196
-380	16.9599		-380	17.1896		-380	17.2754		-380	10.9994		-380	11.098		-380	11.181
-370	17.0043		-370	17.2008		-370	17.2141		-370	11.0188		-370	11.1384		-370	11.1258
-360	16.9462		-360	17.1706		-360	17.236		-360	10.9849		-360	11.1131		-360	11.1584
-350	17.0183		-350	17.1292		-350	17.2881		-350	11.0403		-350	11.0901		-350	11.1456
-340	17.0042		-340	17.1817		-340	17.3015		-340	11.001		-340	11.1054		-340	11.1559
-330	16.9911		-330	17.1527		-330	17.3794		-330	11.0308		-330	11.1164		-330	11.1966
-320	17.0284		-320	17.2363		-320	17.26		-320	11.0302		-320	11.1444		-320	11.1233
-310	17.0097		-310	17.1843		-310	17.3172		-310	11.0279		-310	11.1142		-310	11.1232
-300	17.0774		-300	17.1222		-300	17.3199		-300	11.042		-300	11.099		-300	11.0962
-290	17.2137		-290	17.1638		-290	17.3486		-290	11.07		-290	11.1191		-290	11.1232
-280	17.486		-280	17.2356		-280	17.4624		-280	11.0482		-280	11.15		-280	11.1212
-270	17.86		-270	17.2056		-270	17.4994		-270	11.0605		-270	11.1524		-270	11.1318
-260	18.3434		-260	17.1814		-260	17.5842		-260	11.0541		-260	11.1409		-260	11.1224
-250	18.7926		-250	17.2308		-250	17.7296		-250	11.0344		-250	11.1493		-250	11.1712
-240	19.2365		-240	17.2137		-240	17.791		-240	11.0113		-240	11.1316		-240	11.1018
-230	19.6813		-230	17.2434		-230	18.0041		-230	10.9895		-230	11.1414		-230	11.079
-220	20.2516		-220	17.2142		-220	18.3451		-220	10.9888		-220	11.1449		-220	11.0625
-210	21.0729		-210	17.2557		-210	18.7105		-210	10.9646		-210	11.1691		-210	10.9973
-200	22.1677		-200	17.2501		-200	19.2583		-200	10.9747		-200	11.1427		-200	10.9495
-190	23.4239		-190	17.3258		-190	20.0081		-190	10.9533		-190	11.1646		-190	10.8781
-180	24.7636		-180	17.3443		-180	20.7237		-180	10.9435		-180	11.1301		-180	10.7379
-170	26.2074		-170	17.5292		-170	21.4946		-170	10.8582		-170	11.1358		-170	10.606
-160	27.7434		-160	17.8498		-160	22.4156		-160	10.76		-160	11.1387		-160	10.4509
-150	29.0817		-150	18.2521		-150	23.3939		-150	10.6339		-150	11.1051		-150	10.3438
-140	30.5787		-140	18.8662		-140	24.3419		-140	10.6454		-140	11.0924		-140	10.1826
-130	31.7663		-130	19.7411		-130	25.3514		-130	10.5542		-130	10.998		-130	10.058
-120	32.7151		-120	20.8597		-120	26.1106		-120	10.5618		-120	10.8406		-120	9.94473
-110	33.3662		-110	22.1567		-110	26.6983		-110	10.5435		-110	10.6791		-110	9.78415
-100	33.6778		-100	23.6409		-100	27.2422		-100	10.505		-100	10.5032		-100	9.73663
-90	33.842		-90	25.0803		-90	27.5933		-90	10.4882		-90	10.2699		-90	9.68823
-80	33.7047		-80	26.4287		-80	27.8825		-80	10.4804		-80	10.074		-80	9.6688
-70	33.4741		-70	27.6095		-70	28.0433		-70	10.4609		-70	9.84996		-70	9.66582
-60	32.9197		-60	28.5676		-60	28.1652		-60	10.5193		-60	9.74819		-60	9.65167
-50	32.1473		-50	29.4395		-50	28.1031		-50	10.5762		-50	9.62894		-50	9.64627
-40	30.9949		-40	29.9859		-40	27.9874		-40	10.6039		-40	9.57208		-40	9.64019
-30	29.6698		-30	30.3001		-30	27.9362		-30	10.6808		-30	9.49268		-30	9.68866
-20	28.1977		-20	30.5906		-20	27.7757		-20	10.7178		-20	9.5257		-20	9.66021
-10	26.7116		-10	30.6961		-10	27.5806		-10	10.8061		-10	9.51521		-10	9.686
0	25.2208		0	30.6801		0	27.3058		0	10.8739		0	9.49821		0	9.75189
10	23.6651		10	30.7729		10	26.8099		10	10.95		10	9.50878		10	9.79047
20	22.227		20	30.6163		20	26.3895		20	10.99		20	9.5021		20	9.87682
30	20.9198		30	30.4214		30	25.7254		30	10.9926		30	9.53075		30	9.98482
40	19.9601		40	29.8959		40	25.0127		40	11.059		40	9.54287		40	10.0597
50	19.0388		50	29.3747		50	24.1312		50	11.1152		50	9.60538		50	10.1983
60	18.3276		60	28.5412		60	23.2628		60	11.0984		60	9.72177		60	10.3498
70	17.6702		70	27.5732		70	22.307		70	11.0617		70	9.84121		70	10.5018
80	17.3295		80	26.3505		80	21.382		80	11.0522		80	10.068		80	10.6346
90	17.178		90	24.9268		90	20.5702		90	11.082		90	10.2744		90	10.7776
100	17.0751		100	23.4435		100	19.7869		100	11.0665		100	10.4832		100	10.8614
110	17.0221		110	22.0842		110	19.1196		110	11.0198		110	10.6894		110	10.9395
120	16.9898		120	20.8368		120	18.6072		120	11.0535		120	10.8674		120	11.0539
130	17.0432		130	19.6887		130	18.1531		130	11.0125		130	10.9704		130	11.1012
140	16.9629		140	18.8357		140	17.903		140	11.0061		140	10.9958		140	11.1269
150	17.0465		150	18.2306		150	17.6235		150	11.0406		150	11.0955		150	11.1172
160	17.0432		160	17.8211		160	17.4969		160	11.0439		160	11.0952		160	11.1431
170	16.9528		170	17.6161		170	17.4483		170	11.0049		170	11.2063		170	11.1815
180	17.0139		180	17.3858		180	17.4009		180	11.0345		180	11.1516		180	11.1616
190	17.026		190	17.244		190	17.4274		190	11.0461		190	11.1097		190	11.1136
200	17.0388		200	17.2977		200	17.4789		200	11.028		200	11.1985		200	11.1543
210	17.0127		210	17.2632		210	17.4842		210	11.0299		210	11.1263		210	11.175
220	17.0162		220	17.1742		220	17.4375		220	11.0224		220	11.1296		220	11.1254
230	16.9696		230	17.1868		230	17.4225		230	10.9958		230	11.1278		230	11.1147
240	17.0602		240	17.1496		240	17.4424		240	11.0633		240	11.1214		240	11.1121
250	17.0061		250	17.2469		250	17.4077		250	11.0056		250	11.165		250	11.1392
260	17.0155		260	17.217		260	17.455		260	11.0758		260	11.1429		260	11.1377
270	17.0107		270	17.1274		270	17.4741		270	11.0256		270	11.1126		270	11.1681
280	17.0254		280	17.2087		280	17.3998		280	11.0145		280	11.134		280	11.1162
290	17.0462		290	17.1941		290	17.3936		290	11.0423		290	11.1373		290	11.1404
300	16.9689		300	17.1855		300	17.3427		300	11.0306		300	11.1178		300	11.0875
310	16.9916		310	17.1587		310	17.4584		310	11.0293		310	11.1174		310	11.1305
320	17.0247		320	17.218		320	17.405		320	10.9992		320	11.1329		320	11.1496
330	16.9632		330	17.1647		330	17.4397		330	11.0277		330	11.1077		330	11.1107
340	17.0219		340	17.1421		340	17.4464		340	11.0067		340	11.0889		340	11.1115
350	16.9796		350	17.1975		350	17.4646		350	11.0349		350	11.1425		350	11.0955
360	17.0165		360	17.2157		360	17.4658		360	11.0407		360	11.1124		360	11.1089
370	16.9245		370	17.2491		370	17.4209		370	10.9658		370	11.1937		370	11.0857
380	16.9496		380	17.2374		380	17.4745		380	10.9924		380	11.1679		380	11.1178
390	17.0236		390	17.2308		390	17.5024		390	11.0232		390	11.1286		390	11.1191
400	16.954		400	17.199		400	17.4178		400	11.0084		400	11.1241		400	11.0972
410	16.9605		410	17.1878		410	17.3828		410	10.9941		410	11.1325		410	11.0867
420	16.996		420	17.2156		420	17.38		420	11		420	11.1447		420	11.117
430	17.0185		430	17.1504		430	17.378		430	11.0324		430	11.0844		430	11.1362
440	16.9778		440	17.1608		440	17.3318		440	11.0243		440	11.1226		440	11.0964
450	16.993		450	17.1398		450	17.3065		450	11.0169		450	11.1019		450	11.1119
460	16.9551		460	17.2093		460	17.3347		460	11.0006		460	11.1416		460	11.1437
470	16.9451		470	17.2507		470	17.3489		470	10.9832		470	11.1415		470	11.1351
480	16.9689		480	17.2551		480	17.3046		480	11.0112		480	11.1635		480	11.1162
490	16.9307		490	17.1506		490	17.2856		490	10.9707		490	11.1036		490	11.1262
500	17.0015		500	17.1745		500	17.3051		500	11.0172		500	11.1254		500	11.1203
510	17.0017		510	17.2605		510	17.3406		510	11.0339		510	11.1349		510	11.1335
520	16.9495		520	17.1975		520	17.3064		520	11.002		520	11.1247		520	11.1371
530	17.0525		530	17.1008		530	17.2501		530	11.0266		530	11.0887		530	11.1242
540	16.9917		540	17.1678		540	17.2254		540	11.0251		540	11.1038		540	11.0807
550	17.0128		550	17.1392		550	17.31		550	11.0066		550	11.0893		550	11.1444
560	16.973		560	17.1528		560	17.2597		560	11.0209		560	11.1119		560	11.1199
570	16.9971		570	17.1328		570	17.2774		570	11.0021		570	11.1052		570	11.1531
580	17.005		580	17.1698		580	17.2559		580	11.0441		580	11.1074		580	11.1295
590	16.9524		590	17.1585		590	17.2444		590	11.0023		590	11.1052		590	11.1243
600	16.9646		600	17.1288		600	17.2913		600	11.004		600	11.0881		600	11.1495
610	17.0075		610	17.1619		610	17.2287		610	11.0175		610	11.1375		610	11.1133
620	17.0051		620	17.1856		620	17.2578		620	11.0201		620	11.1299		620	11.1641
630	16.9454		630	17.1672		630	17.2557		630	11.0159		630	11.1276		630	11.1148
640	17.0218		640	17.2164		640	17.2501		640	11.0521		640	11.1491		640	11.1512
650	17.0231		650	17.1717		650	17.2188		650	11.0415		650	11.1359		650	11.1096
660	16.9985		660	17.1656		660	17.1767		660	11.014		660	11.1224		660	11.1193
670	16.97		670	17.1534		670	17.2386		670	11.0181		670	11.1213		670	11.1254
680	17.0422		680	17.1781		680	17.1963		680	11.0355		680	11.1051		680	11.1106
690	17.0027		690	17.1396		690	17.2142		690	11.0504		690	11.1193		690	11.1141
700	17.0326		700	17.1621		700	17.264		700	11.027		700	11.1172		700	11.1617
710	16.9843		710	17.2224		710	17.1875		710	11.0264		710	11.145		710	11.1223
720	17.0105		720	17.1801		720	17.1703		720	11.0564		720	11.1433		720	11.1126
730	17.0288		730	17.1929		730	17.2294		730	11.0204		730	11.141		730	11.1592
740	16.9743		740	17.1686		740	17.2143		740	11.0156		740	11.1236		740	11.1257
750	17.0186		750	17.1508		750	17.2724		750	11.0508		750	11.1345		750	11.1623
760	17.0309		760	17.1685		760	17.2483		760	11.0227		760	11.142		760	11.1624
770	16.9902		770	17.1401		770	17.2806		770	11.0121		770	11.1007		770	11.1489
780	16.9829		780	17.2039		780	17.1855		780	11.0352		780	11.1533		780	11.1479
790	17.018		790	17.1233		790	17.2695		790	11.0323		790	11.0995		790	11.1472
800	16.9728		800	17.1624		800	17.2303		800	10.9978		800	11.1452		800	11.1586
810	16.9999		810	17.1263		810	17.2133		810	11.0258		810	11.1067		810	11.1307
820	17.0034		820	17.1635		820	17.2725		820	11.0339		820	11.0999		820	11.1452
830	17.0038		830	17.1674		830	17.2531		830	11.0399		830	11.134		830	11.1599
840	17.0279		840	17.1761		840	17.2295		840	11.0535		840	11.1315		840	11.1567
850	17.0409		850	17.1873		850	17.2638		850	11.0436		850	11.14		850	11.1818
860	17.0353		860	17.1426		860	17.2062		860	11.042		860	11.1191		860	11.1303
870	17.0318		870	17.1809		870	17.2173		870	11.0356		870	11.123		870	11.1262
880	16.97		880	17.1412		880	17.1693		880	11.0342		880	11.0965		880	11.1206
890	16.953		890	17.0762		890	17.1679		890	10.9814		890	11.0966		890	11.1313
900	17.0025		900	17.1543		900	17.2117		900	11.0344		900	11.089		900	11.1083
910	16.9668		910	17.2184		910	17.2336		910	11.0311		910	11.1569		910	11.1625
920	17.0076		920	17.1441		920	17.2474		920	11.0256		920	11.1142		920	11.1342
930	17.0881		930	17.1937		930	17.2201		930	11.0463		930	11.1209		930	11.1478
940	16.9459		940	17.1787		940	17.1929		940	11.0061		940	11.1455		940	11.1121
950	16.9612		950	17.1974		950	17.2234		950	11.0061		950	11.1414		950	11.1745
960	17.0441		960	17.205		960	17.2308		960	11.0457		960	11.1311		960	11.1496
970	17.0484		970	17.1635		970	17.2177		970	11.0402		970	11.0837		970	11.1222
980	16.9096		980	17.1883		980	17.1749		980	10.9758		980	11.1798		980	11.1041
990	16.9623		990	17.2057		990	17.2311		990	11.0167		990	11.1363		990	11.1295
1000	16.948		1000	17.1907		1000	17.2321		1000	10.9761		1000	11.1213		1000	11.1583
1010	16.9982		1010	17.1698		1010	17.2128		1010	11.023		1010	11.1149		1010	11.1606
1020	16.9874		1020	17.1786		1020	17.2763		1020	11.0208		1020	11.1359		1020	11.1727
1030	16.9389		1030	17.1863		1030	17.2872		1030	11.0165		1030	11.116		1030	11.1785
1040	16.9972		1040	17.1474		1040	17.2571		1040	10.9967		1040	11.1145		1040	11.1361
1050	16.9367		1050	17.1265		1050	17.2251		1050	10.9915		1050	11.1092		1050	11.16
1060	16.9538		1060	17.1343		1060	17.2177		1060	11.0069		1060	11.109		1060	11.1401
1070	16.9438		1070	17.1325		1070	17.1963		1070	10.9962		1070	11.1058		1070	11.1144

## Sheet: Sheet3
Caprin1, 960 mM NaCl
200K			220K			225K			200K			220K			225K
Z (angstorm)	[Cl-] (mg/ml)		Z (angstorm)	[Cl-] (mg/ml)		Z (angstorm)	[Cl-] (mg/ml)		Z (angstorm)	[Na+] (mg/ml)		Z (angstorm)	[Na+] (mg/ml)		Z (angstorm)	[Na+] (mg/ml)
-540	34.0116		-540	34.6463		-540	34.6868		-540	22.0419		-540	22.3271		-540	22.793
-530	34.0559		-530	34.6656		-530	34.3808		-530	22.0903		-530	22.4047		-530	22.8488
-520	34.0216		-520	34.6871		-520	34.3257		-520	22.0958		-520	22.4021		-520	22.1246
-510	34.0494		-510	34.6411		-510	34.7229		-510	22.1		-510	22.3397		-510	22.6648
-500	34.0177		-500	34.6856		-500	34.1509		-500	22.038		-500	22.378		-500	22.2267
-490	33.9737		-490	34.6939		-490	34.5304		-490	22.0746		-490	22.3981		-490	22.0553
-480	34.0946		-480	34.727		-480	34.942		-480	22.0576		-480	22.4315		-480	22.3933
-470	34.0463		-470	34.7218		-470	34.9737		-470	22.0836		-470	22.3721		-470	22.3807
-460	34.0096		-460	34.744		-460	34.9568		-460	22.0594		-460	22.4043		-460	22.3722
-450	34.0837		-450	34.7253		-450	34.9509		-450	22.1065		-450	22.4113		-450	22.3956
-440	34.005		-440	34.7737		-440	34.988		-440	22.093		-440	22.4041		-440	22.388
-430	34.0601		-430	34.8287		-430	35.0515		-430	22.0675		-430	22.4452		-430	22.4135
-420	34.057		-420	34.7304		-420	35.0103		-420	22.0813		-420	22.4208		-420	22.3965
-410	34.0605		-410	34.6728		-410	35.0903		-410	22.1043		-410	22.3663		-410	22.3707
-400	33.9893		-400	34.6989		-400	35.1342		-400	22.0263		-400	22.3176		-400	22.4055
-390	34.0774		-390	34.7		-390	35.1157		-390	22.1135		-390	22.3732		-390	22.36
-380	34.0203		-380	34.7797		-380	35.2108		-380	22.0688		-380	22.3963		-380	22.3893
-370	34.0394		-370	34.805		-370	35.2435		-370	22.0942		-370	22.3368		-370	22.3058
-360	34.0045		-360	34.7279		-360	35.2055		-360	22.052		-360	22.349		-360	22.3262
-350	34.1458		-350	34.8371		-350	35.2125		-350	22.1161		-350	22.3485		-350	22.3091
-340	34.0228		-340	34.9369		-340	35.2385		-340	22.1093		-340	22.3528		-340	22.3287
-330	34.0889		-330	34.9794		-330	35.3467		-330	22.088		-330	22.3477		-330	22.3761
-320	34.0932		-320	35.0938		-320	35.2931		-320	22.1194		-320	22.3817		-320	22.352
-310	34.1547		-310	35.1973		-310	35.1711		-310	22.1191		-310	22.3788		-310	22.3475
-300	34.0352		-300	35.2601		-300	35.1775		-300	22.1219		-300	22.315		-300	22.3374
-290	34.1137		-290	35.5357		-290	35.2427		-290	22.1102		-290	22.3802		-290	22.4003
-280	34.0789		-280	35.7244		-280	35.2298		-280	22.0881		-280	22.3356		-280	22.4015
-270	34.047		-270	36.0231		-270	35.2012		-270	22.1198		-270	22.3181		-270	22.3479
-260	34.1576		-260	36.1692		-260	35.1682		-260	22.1289		-260	22.1963		-260	22.3449
-250	34.1147		-250	36.6461		-250	35.3032		-250	22.1123		-250	22.0962		-250	22.3743
-240	34.1554		-240	37.1344		-240	35.3349		-240	22.1368		-240	22.0348		-240	22.3503
-230	34.0893		-230	37.6873		-230	35.477		-230	22.1253		-230	21.9364		-230	22.3423
-220	34.217		-220	38.2859		-220	35.5351		-220	22.1594		-220	21.8114		-220	22.2884
-210	34.3256		-210	38.8073		-210	35.626		-210	22.1968		-210	21.6467		-210	22.3308
-200	34.399		-200	39.5684		-200	35.8841		-200	22.2		-200	21.5616		-200	22.2843
-190	34.7795		-190	40.0492		-190	35.9774		-190	22.2974		-190	21.3429		-190	22.1931
-180	35.2568		-180	40.5925		-180	36.1292		-180	22.2782		-180	21.2181		-180	22.2268
-170	36.1922		-170	41.041		-170	36.5498		-170	22.3595		-170	21.0596		-170	22.2269
-160	37.5092		-160	41.5207		-160	36.6638		-160	22.3873		-160	20.9763		-160	22.1146
-150	39.1484		-150	41.9449		-150	37.0451		-150	22.2716		-150	20.8117		-150	22.0282
-140	40.9645		-140	42.3653		-140	37.3068		-140	22.1471		-140	20.7736		-140	21.8834
-130	42.6623		-130	42.6647		-130	37.6754		-130	21.9147		-130	20.6602		-130	21.8188
-120	44.2798		-120	43.0181		-120	38.1375		-120	21.6093		-120	20.6075		-120	21.6713
-110	45.6873		-110	43.3016		-110	38.5852		-110	21.387		-110	20.5902		-110	21.6316
-100	46.9848		-100	43.4843		-100	39.0997		-100	21.1982		-100	20.5697		-100	21.5022
-90	48.0918		-90	43.5218		-90	39.445		-90	21.1249		-90	20.4989		-90	21.3527
-80	49.0955		-80	43.5914		-80	39.8827		-80	21.0747		-80	20.4412		-80	21.2551
-70	49.7625		-70	43.6262		-70	40.2678		-70	21.0619		-70	20.409		-70	21.1611
-60	50.2103		-60	43.6388		-60	40.5558		-60	21.0513		-60	20.421		-60	21.0388
-50	50.5785		-50	43.5548		-50	40.853		-50	21.0602		-50	20.4151		-50	20.9243
-40	50.4991		-40	43.3705		-40	41.0983		-40	20.9689		-40	20.4301		-40	20.8822
-30	50.5527		-30	43.0214		-30	41.328		-30	20.9717		-30	20.573		-30	20.7982
-20	50.284		-20	42.6924		-20	41.5178		-20	20.9231		-20	20.6538		-20	20.7747
-10	49.9179		-10	42.1914		-10	41.6465		-10	20.9044		-10	20.7151		-10	20.7312
0	49.147		0	41.7266		0	41.7647		0	20.8421		0	20.9917		0	20.7489
10	48.395		10	40.9469		10	41.7769		10	21.1052		10	21.0722		10	20.7637
20	47.1807		20	40.4648		20	41.8354		20	21.3498		20	21.3492		20	20.6944
30	45.6585		30	39.757		30	41.7595		30	21.5883		30	21.4252		30	20.677
40	43.7851		40	39.1557		40	41.8542		40	21.8239		40	21.5772		40	20.7046
50	41.9346		50	38.5595		50	41.7741		50	22.0552		50	21.8283		50	20.6602
60	40.071		60	37.8727		60	41.7065		60	22.1353		60	21.7866		60	20.6652
70	38.5518		70	37.3529		70	41.6411		70	22.2086		70	21.9403		70	20.7373
80	37.3437		80	36.8596		80	41.4371		80	22.3294		80	22.0007		80	20.7786
90	36.3375		90	36.4605		90	41.2151		90	22.3379		90	22.1614		90	20.8012
100	35.4611		100	36.121		100	40.8794		100	22.2998		100	22.2469		100	20.8685
110	34.895		110	35.7448		110	40.6267		110	22.268		110	22.28		110	20.9873
120	34.5055		120	35.5323		120	40.2561		120	22.2395		120	22.3357		120	21.0759
130	34.2861		130	35.3059		130	39.9289		130	22.1885		130	22.4079		130	21.2884
140	34.1772		140	35.1031		140	39.3951		140	22.1231		140	22.3896		140	21.3747
150	34.1741		150	35.0012		150	38.9674		150	22.1763		150	22.37		150	21.5629
160	34.1478		160	34.9236		160	38.4296		160	22.1425		160	22.3734		160	21.632
170	34.1361		170	34.8573		170	37.9833		170	22.1387		170	22.3943		170	21.8146
180	34.1382		180	34.8082		180	37.4648		180	22.138		180	22.3761		180	21.8916
190	34.1255		190	34.8554		190	37.0612		190	22.1058		190	22.3796		190	22.0332
200	34.0164		200	34.8992		200	36.6708		200	22.0689		200	22.4281		200	22.1455
210	34.0928		210	34.8383		210	36.2979		210	22.0862		210	22.4305		210	22.1758
220	34.0671		220	34.8065		220	36.0704		220	22.0971		220	22.3652		220	22.2922
230	34.1104		230	34.8487		230	35.809		230	22.0975		230	22.3754		230	22.2875
240	34.0458		240	34.8603		240	35.6065		240	22.08		240	22.3731		240	22.3543
250	34.0726		250	34.8451		250	35.4934		250	22.0771		250	22.4023		250	22.3356
260	33.9631		260	34.875		260	35.3696		260	21.9931		260	22.3722		260	22.3473
270	34.0443		270	34.88		270	35.3466		270	22.1134		270	22.3457		270	22.3344
280	34.0838		280	34.8998		280	35.2605		280	22.0533		280	22.3438		280	22.3831
290	34.0773		290	34.9331		290	35.2637		290	22.1232		290	22.3565		290	22.3766
300	34.0127		300	34.8827		300	35.1308		300	22.0351		300	22.317		300	22.3766
310	34.0373		310	34.9229		310	35.1797		310	22.0839		310	22.353		310	22.4393
320	34.1083		320	34.8891		320	35.1091		320	22.06		320	22.3537		320	22.3602
330	34.0507		330	34.9354		330	35.0287		330	22.1166		330	22.351		330	22.4215
340	34.0857		340	34.8747		340	35.0942		340	22.0562		340	22.3113		340	22.4031
350	34.0745		350	34.8655		350	34.9602		350	22.0883		350	22.3155		350	22.409
360	34.025		360	34.8969		360	35.0287		360	22.0876		360	22.3646		360	22.4307
370	34.0364		370	34.8162		370	34.9967		370	22.0604		370	22.3189		370	22.3528
380	34.0769		380	34.8442		380	35.037		380	22.1149		380	22.3541		380	22.3919
390	34.1393		390	34.9106		390	35.0669		390	22.1223		390	22.3846		390	22.4064
400	34.0091		400	34.701		400	35.0264		400	22.0573		400	22.3102		400	22.3455
410	34.1018		410	34.7944		410	35.0324		410	22.1021		410	22.3528		410	22.3848
420	34.1145		420	34.8067		420	35.0224		420	22.1185		420	22.3609		420	22.3004
430	34.0633		430	34.7729		430	34.9054		430	22.1031		430	22.4132		430	22.308
440	34.0424		440	34.7674		440	34.8838		440	22.0835		440	22.3734		440	22.2635
450	34.1406		450	34.7079		450	34.7337		450	22.0894		450	22.3674		450	22.1752
460	34.1006		460	34.7225		460	33.7346		460	22.1329		460	22.3578		460	21.5967
470	34.0897		470	34.7738		470	31.4869		470	22.1228		470	22.4171		470	21.1882
480	34.1049		480	34.7258		480	32.2865		480	22.0865		480	22.3712		480	21.1688
490	34.0968		490	34.7091		490	32.0484		490	22.1225		490	22.3911		490	21.0584
500	34.1177		500	34.7215		500	32.8866		500	22.129		500	22.3844		500	21.0397
510	34.1146		510	34.6798		510	32.556		510	22.1297		510	22.3626		510	21.9035
520	34.0009		520	34.6896		520	32.8023		520	22.0791		520	22.3664		520	21.1545
530	34.1254		530	34.7066		530	32.0259		530	22.1126		530	22.396		530	21.376

## Sheet: Sheet4
pY-Caprin1, 200 mM NaCl
260K			290K			300K			260K			290K			300K
Z (angstorm)	[Cl-] (mg/ml)		Z (angstorm)	[Cl-] (mg/ml)		Z (angstorm)	[Cl-] (mg/ml)		Z (angstorm)	[Na+] (mg/ml)		Z (angstorm)	[Na+] (mg/ml)		Z (angstorm)	[Na+] (mg/ml)
-2780	6.90217		-2780	6.88778		-2780	6.95874		-2780	4.48458		-2780	4.48403		-2780	4.50661
-2770	6.90531		-2770	6.93376		-2770	6.97692		-2770	4.49239		-2770	4.50054		-2770	4.54233
-2760	6.87372		-2760	6.93873		-2760	6.9726		-2760	4.48276		-2760	4.50521		-2760	4.51187
-2750	6.89485		-2750	6.96927		-2750	6.94193		-2750	4.47737		-2750	4.51293		-2750	4.4901
-2740	6.91891		-2740	6.94906		-2740	6.96574		-2740	4.48026		-2740	4.51072		-2740	4.50584
-2730	6.90963		-2730	6.93951		-2730	6.95835		-2730	4.50372		-2730	4.52133		-2730	4.51267
-2720	6.90341		-2720	6.9244		-2720	6.97385		-2720	4.45993		-2720	4.50465		-2720	4.51984
-2710	6.904		-2710	6.97967		-2710	6.91093		-2710	4.4615		-2710	4.50241		-2710	4.51195
-2700	6.91839		-2700	6.92774		-2700	6.94664		-2700	4.49545		-2700	4.50067		-2700	4.5027
-2690	6.90864		-2690	6.94402		-2690	6.95665		-2690	4.47487		-2690	4.52532		-2690	4.50546
-2680	6.92656		-2680	6.9488		-2680	6.9622		-2680	4.47058		-2680	4.48908		-2680	4.53134
-2670	6.89426		-2670	6.97522		-2670	6.95998		-2670	4.47818		-2670	4.49282		-2670	4.51776
-2660	6.9246		-2660	6.9605		-2660	6.96593		-2660	4.49163		-2660	4.52018		-2660	4.53749
-2650	6.90067		-2650	6.91296		-2650	6.9365		-2650	4.48081		-2650	4.51289		-2650	4.4982
-2640	6.92571		-2640	6.95115		-2640	6.95194		-2640	4.50347		-2640	4.50533		-2640	4.50678
-2630	6.9161		-2630	6.93657		-2630	6.9626		-2630	4.46961		-2630	4.49286		-2630	4.51475
-2620	6.87902		-2620	6.92898		-2620	6.97901		-2620	4.48408		-2620	4.49613		-2620	4.52892
-2610	6.8802		-2610	6.95174		-2610	6.9505		-2610	4.48649		-2610	4.52358		-2610	4.51641
-2600	6.90884		-2600	6.9352		-2600	6.94069		-2600	4.46613		-2600	4.50007		-2600	4.50699
-2590	6.90806		-2590	6.95416		-2590	6.97234		-2590	4.48		-2590	4.52723		-2590	4.51836
-2580	6.87797		-2580	6.95187		-2580	6.94533		-2580	4.4705		-2580	4.51216		-2580	4.51972
-2570	6.87555		-2570	6.942		-2570	6.94226		-2570	4.47852		-2570	4.50037		-2570	4.50067
-2560	6.91146		-2560	6.96175		-2560	6.91545		-2560	4.49027		-2560	4.50928		-2560	4.52931
-2550	6.95266		-2550	6.92094		-2550	7.01714		-2550	4.49456		-2550	4.50296		-2550	4.5218
-2540	6.90224		-2540	6.95331		-2540	6.9454		-2540	4.45976		-2540	4.52892		-2540	4.49854
-2530	6.91015		-2530	6.93533		-2530	6.98614		-2530	4.49464		-2530	4.49689		-2530	4.51365
-2520	6.91388		-2520	6.95704		-2520	6.94213		-2520	4.46617		-2520	4.50207		-2520	4.5041
-2510	6.93186		-2510	6.9575		-2510	6.94494		-2510	4.48085		-2510	4.49876		-2510	4.51144
-2500	6.88504		-2500	6.96789		-2500	6.97411		-2500	4.4814		-2500	4.51933		-2500	4.52697
-2490	6.9333		-2490	6.95311		-2490	6.97162		-2490	4.50695		-2490	4.51887		-2490	4.53686
-2480	6.8764		-2480	6.95233		-2480	6.96436		-2480	4.45611		-2480	4.5201		-2480	4.54225
-2470	6.91806		-2470	6.91885		-2470	6.95488		-2470	4.49833		-2470	4.49884		-2470	4.52952
-2460	6.91571		-2460	6.97044		-2460	6.92277		-2460	4.49307		-2460	4.50168		-2460	4.51496
-2450	6.8768		-2450	6.96037		-2450	6.99431		-2450	4.475		-2450	4.50117		-2450	4.51921
-2440	6.90662		-2440	6.91303		-2440	6.96162		-2440	4.47788		-2440	4.4926		-2440	4.53945
-2430	6.9624		-2430	6.95449		-2430	6.97594		-2430	4.49927		-2430	4.5027		-2430	4.51662
-2420	6.91002		-2420	6.9231		-2420	6.9677		-2420	4.48437		-2420	4.50741		-2420	4.4999
-2410	6.91159		-2410	6.94919		-2410	6.94893		-2410	4.48654		-2410	4.50661		-2410	4.5139
-2400	6.91159		-2400	6.92447		-2400	6.95128		-2400	4.47843		-2400	4.50584		-2400	4.50487
-2390	6.88065		-2390	6.95737		-2390	6.96574		-2390	4.47287		-2390	4.52112		-2390	4.50406
-2380	6.91754		-2380	6.90734		-2380	6.9883		-2380	4.47724		-2380	4.48543		-2380	4.53363
-2370	6.90302		-2370	6.92349		-2370	6.96207		-2370	4.49761		-2370	4.51263		-2370	4.5302
-2360	6.94213		-2360	6.97581		-2360	6.99144		-2360	4.47712		-2360	4.50924		-2360	4.53003
-2350	6.90792		-2350	6.97901		-2350	6.9469		-2350	4.49396		-2350	4.51917		-2350	4.53902
-2340	6.90276		-2340	6.99732		-2340	6.93186		-2340	4.48098		-2340	4.52803		-2340	4.49383
-2330	6.90995		-2330	6.93748		-2330	6.94357		-2330	4.46536		-2330	4.51628		-2330	4.51259
-2320	6.87961		-2320	6.96423		-2320	6.9592		-2320	4.48297		-2320	4.47546		-2320	4.52583
-2310	6.91525		-2310	6.93958		-2310	6.96371		-2310	4.46566		-2310	4.53974		-2310	4.52455
-2300	6.91146		-2300	6.96299		-2300	6.95436		-2300	4.50016		-2300	4.50584		-2300	4.50868
-2290	6.93748		-2290	6.93448		-2290	6.95822		-2290	4.49825		-2290	4.51649		-2290	4.54284
-2280	6.94232		-2280	6.95109		-2280	7.0125		-2280	4.49939		-2280	4.50737		-2280	4.53295
-2270	6.92434		-2270	6.91355		-2270	6.95566		-2270	4.4932		-2270	4.50351		-2270	4.50864
-2260	6.91734		-2260	6.91904		-2260	6.99281		-2260	4.49519		-2260	4.49294		-2260	4.52494
-2250	6.90505		-2250	6.97084		-2250	6.96476		-2250	4.4904		-2250	4.50495		-2250	4.53834
-2240	6.91283		-2240	6.95867		-2240	6.94893		-2240	4.47444		-2240	4.52625		-2240	4.50788
-2230	6.92257		-2230	6.9743		-2230	6.9537		-2230	4.47839		-2230	4.51467		-2230	4.52383
-2220	6.9486		-2220	6.92656		-2220	6.9541		-2220	4.51772		-2220	4.49638		-2220	4.51361
-2210	6.91551		-2210	6.94527		-2210	6.94481		-2210	4.4671		-2210	4.50308		-2210	4.49689
-2200	6.91224		-2200	6.93179		-2200	6.95475		-2200	4.49685		-2200	4.50525		-2200	4.51276
-2190	6.9193		-2190	6.98379		-2190	6.96482		-2190	4.51929		-2190	4.52048		-2190	4.52888
-2180	6.86862		-2180	6.9314		-2180	6.97228		-2180	4.46167		-2180	4.51679		-2180	4.50487
-2170	6.94402		-2170	6.95194		-2170	6.94043		-2170	4.49006		-2170	4.51479		-2170	4.50525
-2160	6.92264		-2160	6.96044		-2160	6.95148		-2160	4.49502		-2160	4.51382		-2160	4.52362
-2150	6.91813		-2150	6.95279		-2150	6.92153		-2150	4.49625		-2150	4.51187		-2150	4.51416
-2140	6.92212		-2140	6.97044		-2140	6.90649		-2140	4.46329		-2140	4.51844		-2140	4.50228
-2130	6.8768		-2130	6.95501		-2130	6.96626		-2130	4.45582		-2130	4.53223		-2130	4.50966
-2120	6.91943		-2120	6.94697		-2120	6.92826		-2120	4.47856		-2120	4.50092		-2120	4.50487
-2110	6.91106		-2110	6.92388		-2110	6.95828		-2110	4.48739		-2110	4.52158		-2110	4.50571
-2100	6.89249		-2100	6.99163		-2100	6.98679		-2100	4.48806		-2100	4.52625		-2100	4.53279
-2090	6.91924		-2090	6.98405		-2090	6.97313		-2090	4.50542		-2090	4.51407		-2090	4.51776
-2080	6.89746		-2080	6.99445		-2080	6.98025		-2080	4.47597		-2080	4.53436		-2080	4.51174
-2070	6.92584		-2070	6.9384		-2070	6.96541		-2070	4.49027		-2070	4.4977		-2070	4.52438
-2060	6.90387		-2060	6.96489		-2060	6.96822		-2060	4.47343		-2060	4.52519		-2060	4.51373
-2050	6.93526		-2050	6.97084		-2050	6.96044		-2050	4.48399		-2050	4.52205		-2050	4.52421
-2040	6.93127		-2040	6.93775		-2040	6.9435		-2040	4.49545		-2040	4.50741		-2040	4.51789
-2030	6.92107		-2030	6.9469		-2030	6.94684		-2030	4.49574		-2030	4.52001		-2030	4.51115
-2020	6.93075		-2020	6.95521		-2020	6.98228		-2020	4.51653		-2020	4.50639		-2020	4.53979
-2010	6.89243		-2010	6.93644		-2010	6.98254		-2010	4.47449		-2010	4.52086		-2010	4.54276
-2000	6.91394		-2000	6.95429		-2000	6.97234		-2000	4.48879		-2000	4.51844		-2000	4.52778
-1990	6.89066		-1990	6.97005		-1990	6.95933		-1990	4.48225		-1990	4.52099		-1990	4.51853
-1980	6.9437		-1980	6.95069		-1980	6.9728		-1980	4.49587		-1980	4.49782		-1980	4.53355
-1970	6.9265		-1970	6.9539		-1970	7.00164		-1970	4.47979		-1970	4.49413		-1970	4.54615
-1960	6.92741		-1960	6.95207		-1960	6.96364		-1960	4.4859		-1960	4.49982		-1960	4.51933
-1950	6.93369		-1950	6.92885		-1950	6.97437		-1950	4.49977		-1950	4.51238		-1950	4.52791
-1940	6.9108		-1940	6.92983		-1940	6.96711		-1940	4.46927		-1940	4.51921		-1940	4.50673
-1930	6.9076		-1930	6.92977		-1930	6.98516		-1930	4.47436		-1930	4.5201		-1930	4.5232
-1920	6.93127		-1920	6.96992		-1920	6.97195		-1920	4.51127		-1920	4.51098		-1920	4.52269
-1910	6.89288		-1910	6.95887		-1910	6.97829		-1910	4.46116		-1910	4.48598		-1910	4.5218
-1900	6.9609		-1900	6.92617		-1900	6.97842		-1900	4.50287		-1900	4.51433		-1900	4.55218
-1890	6.90289		-1890	6.95279		-1890	6.95802		-1890	4.50266		-1890	4.49791		-1890	4.52583
-1880	6.95593		-1880	6.90367		-1880	6.9883		-1880	4.50406		-1880	4.47334		-1880	4.53075
-1870	6.87758		-1870	6.94899		-1870	6.93493		-1870	4.48925		-1870	4.52697		-1870	4.4968
-1860	6.91597		-1860	6.91296		-1860	6.94278		-1860	4.51501		-1860	4.50508		-1860	4.51042
-1850	6.92741		-1850	6.97764		-1850	6.97855		-1850	4.47046		-1850	4.50703		-1850	4.53024
-1840	6.91185		-1840	6.95495		-1840	6.94893		-1840	4.50381		-1840	4.48976		-1840	4.51501
-1830	6.90034		-1830	6.95606		-1830	6.94572		-1830	4.47847		-1830	4.51636		-1830	4.50852
-1820	6.90681		-1820	6.94108		-1820	6.98823		-1820	4.47627		-1820	4.50372		-1820	4.5459
-1810	6.90943		-1810	6.96534		-1810	6.95253		-1810	4.48484		-1810	4.51836		-1810	4.52774
-1800	6.92225		-1800	6.96652		-1800	6.92611		-1800	4.48963		-1800	4.51119		-1800	4.50461
-1790	6.9522		-1790	6.90178		-1790	7.00223		-1790	4.48344		-1790	4.50109		-1790	4.51615
-1780	6.92199		-1780	6.92885		-1780	6.98124		-1780	4.47266		-1780	4.51751		-1780	4.54203
-1770	6.92951		-1770	6.94657		-1770	6.95089		-1770	4.49706		-1770	4.51849		-1770	4.51136
-1760	6.91773		-1760	6.96423		-1760	6.997		-1760	4.48705		-1760	4.52443		-1760	4.52277
-1750	6.91479		-1750	6.96502		-1750	6.96384		-1750	4.48963		-1750	4.50818		-1750	4.53253
-1740	6.89864		-1740	6.95305		-1740	6.97136		-1740	4.48755		-1740	4.5167		-1740	4.51912
-1730	6.92866		-1730	6.94435		-1730	6.94187		-1730	4.4671		-1730	4.50504		-1730	4.53117
-1720	6.91074		-1720	6.93526		-1720	6.95449		-1720	4.48543		-1720	4.49727		-1720	4.52731
-1710	6.90668		-1710	6.93356		-1710	7.00909		-1710	4.48934		-1710	4.49358		-1710	4.54276
-1700	6.9076		-1700	6.96796		-1700	6.9811		-1700	4.49659		-1700	4.52337		-1700	4.53966
-1690	6.90773		-1690	6.98673		-1690	6.97267		-1690	4.48777		-1690	4.52638		-1690	4.52277
-1680	6.8751		-1680	6.97254		-1680	6.99595		-1680	4.47682		-1680	4.50516		-1680	4.53847
-1670	6.93624		-1670	6.93657		-1670	6.96162		-1670	4.50045		-1670	4.49036		-1670	4.53075
-1660	6.86941		-1660	6.96574		-1660	6.97332		-1660	4.47313		-1660	4.52086		-1660	4.4957
-1650	6.91538		-1650	6.94742		-1650	6.95442		-1650	4.48416		-1650	4.5111		-1650	4.51301
-1640	6.87339		-1640	6.94998		-1640	7.0017		-1640	4.45391		-1640	4.53126		-1640	4.5453
-1630	6.92179		-1630	6.95684		-1630	6.98732		-1630	4.47954		-1630	4.51306		-1630	4.54284
-1620	6.92114		-1620	6.95416		-1620	6.99104		-1620	4.49613		-1620	4.52477		-1620	4.52642
-1610	6.88072		-1610	6.94089		-1610	6.96149		-1610	4.45306		-1610	4.50495		-1610	4.54131
-1600	6.91773		-1600	6.94259		-1600	6.97633		-1600	4.4747		-1600	4.51793		-1600	4.5111
-1590	6.9471		-1590	6.97744		-1590	6.99706		-1590	4.48399		-1590	4.53546		-1590	4.55425
-1580	6.88144		-1580	6.92277		-1580	6.98215		-1580	4.45921		-1580	4.49137		-1580	4.53877
-1570	6.90603		-1570	6.94671		-1570	6.94657		-1570	4.49498		-1570	4.51522		-1570	4.53194
-1560	6.92964		-1560	6.96561		-1560	6.95874		-1560	4.48301		-1560	4.53054		-1560	4.54208
-1550	6.90642		-1550	6.97855		-1550	6.98647		-1550	4.48594		-1550	4.52112		-1550	4.53419
-1540	6.88137		-1540	6.96384		-1540	6.98562		-1540	4.4719		-1540	4.49765		-1540	4.52294
-1530	6.90969		-1530	6.95488		-1530	6.98222		-1530	4.50996		-1530	4.50448		-1530	4.51827
-1520	6.92885		-1520	6.95815		-1520	6.9815		-1520	4.48374		-1520	4.51166		-1520	4.53202
-1510	6.90335		-1510	6.96253		-1510	7.02708		-1510	4.50936		-1510	4.49787		-1510	4.56185
-1500	6.91904		-1500	6.9881		-1500	6.97973		-1500	4.50614		-1500	4.52018		-1500	4.5288
-1490	6.93892		-1490	6.93932		-1490	6.98215		-1490	4.48883		-1490	4.51564		-1490	4.53673
-1480	6.9244		-1480	6.92696		-1480	6.96888		-1480	4.48467		-1480	4.50181		-1480	4.54539
-1470	6.93539		-1470	6.91231		-1470	6.98418		-1470	4.47954		-1470	4.48		-1470	4.54013
-1460	6.88602		-1460	6.90309		-1460	6.98379		-1460	4.48921		-1460	4.49396		-1460	4.53071
-1450	6.91564		-1450	6.96731		-1450	6.99615		-1450	4.45102		-1450	4.53762		-1450	4.53279
-1440	6.92231		-1440	6.94102		-1440	6.98686		-1440	4.48085		-1440	4.52931		-1440	4.52506
-1430	6.90537		-1430	6.95226		-1430	6.96901		-1430	4.48285		-1430	4.52201		-1430	4.52146
-1420	6.92133		-1420	6.96332		-1420	6.92257		-1420	4.49897		-1420	4.49973		-1420	4.50847
-1410	6.90204		-1410	6.94749		-1410	6.94546		-1410	4.47699		-1410	4.52366		-1410	4.51081
-1400	6.90309		-1400	6.96077		-1400	6.9588		-1400	4.47729		-1400	4.51093		-1400	4.51539
-1390	6.92591		-1390	6.95357		-1390	6.96802		-1390	4.4755		-1390	4.52001		-1390	4.54369
-1380	6.89982		-1380	6.98091		-1380	6.98843		-1380	4.48475		-1380	4.51187		-1380	4.5436
-1370	6.91257		-1370	6.95665		-1370	6.96953		-1370	4.50011		-1370	4.48128		-1370	4.51339
-1360	6.91191		-1360	6.93264		-1360	6.95743		-1360	4.496		-1360	4.49731		-1360	4.52375
-1350	6.90629		-1350	6.96711		-1350	6.97417		-1350	4.49782		-1350	4.51552		-1350	4.53045
-1340	6.90773		-1340	6.93546		-1340	6.97143		-1340	4.50839		-1340	4.52549		-1340	4.53512
-1330	6.92205		-1330	6.94788		-1330	6.97836		-1330	4.48128		-1330	4.49167		-1330	4.53856
-1320	6.88968		-1320	6.93238		-1320	6.95174		-1320	4.49112		-1320	4.51293		-1320	4.50593
-1310	6.90688		-1310	6.99052		-1310	6.98568		-1310	4.46965		-1310	4.51064		-1310	4.52998
-1300	6.95011		-1300	6.94618		-1300	6.97757		-1300	4.47907		-1300	4.52668		-1300	4.51025
-1290	6.92964		-1290	6.95717		-1290	6.95717		-1290	4.47903		-1290	4.52638		-1290	4.51717
-1280	6.92669		-1280	6.95959		-1280	6.98091		-1280	4.47453		-1280	4.52557		-1280	4.5246
-1270	6.93363		-1270	6.93892		-1270	6.99006		-1270	4.49553		-1270	4.51827		-1270	4.53419
-1260	6.91198		-1260	6.93905		-1260	6.9609		-1260	4.48997		-1260	4.49672		-1260	4.51276
-1250	6.97143		-1250	6.94272		-1250	6.9607		-1250	4.52544		-1250	4.51017		-1250	4.54225
-1240	6.9244		-1240	6.97077		-1240	6.99974		-1240	4.48539		-1240	4.51166		-1240	4.55247
-1230	6.92395		-1230	6.92682		-1230	6.99621		-1230	4.47287		-1230	4.49608		-1230	4.55001
-1220	6.90714		-1220	6.91852		-1220	6.98621		-1220	4.50381		-1220	4.48675		-1220	4.54106
-1210	6.88647		-1210	6.94363		-1210	6.98437		-1210	4.48369		-1210	4.51076		-1210	4.53618
-1200	6.90714		-1200	6.93173		-1200	6.9798		-1200	4.48611		-1200	4.49927		-1200	4.53508
-1190	6.88889		-1190	6.96632		-1190	6.96927		-1190	4.46774		-1190	4.52129		-1190	4.53469
-1180	6.89504		-1180	6.94141		-1180	6.9764		-1180	4.47775		-1180	4.49812		-1180	4.52082
-1170	6.85744		-1170	6.94187		-1170	7.02283		-1170	4.48802		-1170	4.50542		-1170	4.54458
-1160	6.92787		-1160	6.96659		-1160	6.95056		-1160	4.49052		-1160	4.51297		-1160	4.52765
-1150	6.8972		-1150	6.94827		-1150	6.9932		-1150	4.46804		-1150	4.51153		-1150	4.53991
-1140	6.89014		-1140	6.95652		-1140	6.97698		-1140	4.46774		-1140	4.49596		-1140	4.52867
-1130	6.8904		-1130	6.94461		-1130	7.01877		-1130	4.48		-1130	4.5114		-1130	4.53287
-1120	6.94389		-1120	6.92408		-1120	6.96914		-1120	4.48632		-1120	4.5145		-1120	4.51318
-1110	6.92074		-1110	6.96286		-1110	6.95292		-1110	4.46435		-1110	4.52371		-1110	4.53529
-1100	6.8819		-1100	6.90838		-1100	6.99255		-1100	4.46494		-1100	4.51208		-1100	4.52723
-1090	6.91466		-1090	6.9828		-1090	6.97038		-1090	4.48255		-1090	4.50894		-1090	4.54136
-1080	6.89864		-1080	6.96168		-1080	6.95357		-1080	4.46494		-1080	4.52443		-1080	4.53062
-1070	6.92094		-1070	6.95481		-1070	6.98313		-1070	4.48386		-1070	4.50601		-1070	4.53372
-1060	6.93892		-1060	6.97731		-1060	6.98071		-1060	4.48454		-1060	4.51713		-1060	4.53779
-1050	6.9059		-1050	6.9297		-1050	6.95253		-1050	4.49922		-1050	4.49477		-1050	4.52273
-1040	6.89105		-1040	6.95043		-1040	7.00811		-1040	4.48518		-1040	4.531		-1040	4.54772
-1030	6.88196		-1030	6.92212		-1030	6.97555		-1030	4.48862		-1030	4.48883		-1030	4.51921
-1020	6.9074		-1020	6.96855		-1020	6.95534		-1020	4.50105		-1020	4.51467		-1020	4.53805
-1010	6.93533		-1010	6.91525		-1010	6.94599		-1010	4.5033		-1010	4.50143		-1010	4.52812
-1000	6.91146		-1000	6.96384		-1000	7.00092		-1000	4.48442		-1000	4.51267		-1000	4.54534
-990	6.92218		-990	6.95325		-990	6.99739		-990	4.50728		-990	4.51293		-990	4.52752
-980	6.91545		-980	6.98673		-980	6.99804		-980	4.45633		-980	4.52154		-980	4.53525
-970	6.92591		-970	6.99118		-970	6.97999		-970	4.49689		-970	4.48811		-970	4.50011
-960	6.91479		-960	6.9231		-960	6.9692		-960	4.48306		-960	4.53508		-960	4.54267
-950	6.93232		-950	6.93964		-950	6.97332		-950	4.47601		-950	4.49231		-950	4.54509
-940	6.95959		-940	6.95102		-940	6.98882		-940	4.49914		-940	4.51399		-940	4.55133
-930	6.89086		-930	6.94801		-930	6.98791		-930	4.48403		-930	4.5372		-930	4.51327
-920	6.91257		-920	6.93363		-920	6.99824		-920	4.46409		-920	4.51221		-920	4.55201
-910	6.8887		-910	6.93781		-910	6.98176		-910	4.46978		-910	4.49944		-910	4.52515
-900	6.98333		-900	6.93945		-900	6.97188		-900	4.51628		-900	4.52689		-900	4.55213
-890	6.9246		-890	6.94651		-890	6.98987		-890	4.48815		-890	4.50695		-890	4.5459
-880	6.87627		-880	6.96672		-880	6.95449		-880	4.47572		-880	4.51047		-880	4.52506
-870	6.91872		-870	6.97509		-870	6.99248		-870	4.49468		-870	4.51781		-870	4.53469
-860	6.87307		-860	6.96436		-860	6.98084		-860	4.49282		-860	4.50313		-860	4.55099
-850	6.91335		-850	6.94082		-850	6.97836		-850	4.49659		-850	4.51679		-850	4.53172
-840	6.94317		-840	6.95115		-840	6.97855		-840	4.50521		-840	4.49778		-840	4.53932
-830	6.93009		-830	6.98143		-830	6.97326		-830	4.51636		-830	4.50605		-830	4.53949
-820	6.90263		-820	6.97744		-820	7.00838		-820	4.49477		-820	4.53733		-820	4.54802
-810	6.89674		-810	6.96914		-810	6.99863		-810	4.45972		-810	4.52006		-810	4.54004
-800	6.90681		-800	6.9639		-800	6.99		-800	4.48514		-800	4.50885		-800	4.53847
-790	6.91191		-790	6.95665		-790	6.98405		-790	4.46286		-790	4.49999		-790	4.54042
-780	6.93238		-780	6.90465		-780	6.97574		-780	4.50168		-780	4.50852		-780	4.52443
-770	6.93193		-770	6.9794		-770	7.00295		-770	4.46918		-770	4.53716		-770	4.56473
-760	6.92532		-760	6.96018		-760	7.00229		-760	4.47741		-760	4.52922		-760	4.52858
-750	6.88896		-750	6.91531		-750	6.98895		-750	4.46002		-750	4.51352		-750	4.52023
-740	6.88922		-740	6.95907		-740	6.98771		-740	4.47012		-740	4.52532		-740	4.55048
-730	6.93932		-730	6.96717		-730	6.9881		-730	4.48789		-730	4.51492		-730	4.5473
-720	6.92898		-720	6.93441		-720	6.99804		-720	4.50139		-720	4.51144		-720	4.54394
-710	6.92087		-710	6.94141		-710	6.976		-710	4.48149		-710	4.50728		-710	4.55188
-700	6.89138		-700	6.94023		-700	6.96018		-700	4.50287		-700	4.50393		-700	4.53419
-690	6.89648		-690	6.95737		-690	6.97509		-690	4.46838		-690	4.51675		-690	4.52438
-680	6.9059		-680	7.00288		-680	6.94075		-680	4.49736		-680	4.51335		-680	4.54076
-670	6.93127		-670	6.9811		-670	6.98503		-670	4.52799		-670	4.52901		-670	4.53164
-660	6.87876		-660	6.95292		-660	6.98032		-660	4.49014		-660	4.52146		-660	4.51942
-650	6.91211		-650	6.97012		-650	6.98124		-650	4.47521		-650	4.51327		-650	4.53783
-640	6.90681		-640	6.973		-640	6.98392		-640	4.48543		-640	4.50758		-640	4.54793
-630	6.9348		-630	6.95985		-630	6.98784		-630	4.49948		-630	4.5195		-630	4.52426
-620	6.93023		-620	6.95756		-620	6.96449		-620	4.47682		-620	4.51586		-620	4.5389
-610	6.92185		-610	6.94559		-610	6.98836		-610	4.50283		-610	4.50724		-610	4.55052
-600	6.92709		-600	6.92924		-600	6.99588		-600	4.46647		-600	4.5027		-600	4.55527
-590	6.91015		-590	6.9382		-590	7.00667		-590	4.44788		-590	4.52277		-590	4.51509
-580	6.90721		-580	6.94291		-580	6.98777		-580	4.46299		-580	4.51607		-580	4.53032
-570	6.90269		-570	6.99229		-570	6.99693		-570	4.4657		-570	4.55761		-570	4.52769
-560	6.94716		-560	6.96613		-560	7.00739		-560	4.48251		-560	4.54742		-560	4.54861
-550	6.89982		-550	6.96717		-550	6.9692		-550	4.48641		-550	4.52752		-550	4.53079
-540	6.89485		-540	6.92205		-540	6.94893		-540	4.49065		-540	4.50482		-540	4.54772
-530	6.87856		-530	6.95325		-530	6.96044		-530	4.48874		-530	4.49651		-530	4.53274
-520	6.89256		-520	6.98692		-520	6.97535		-520	4.47758		-520	4.517		-520	4.53444
-510	6.87699		-510	6.97306		-510	6.97221		-510	4.48823		-510	4.51467		-510	4.53996
-500	6.91492		-500	6.96796		-500	6.97659		-500	4.47932		-500	4.52345		-500	4.54017
-490	6.8868		-490	6.97378		-490	7.03251		-490	4.49528		-490	4.52175		-490	4.56834
-480	6.90511		-480	6.97659		-480	6.96541		-480	4.48671		-480	4.49303		-480	4.51849
-470	6.92669		-470	6.9764		-470	6.99968		-470	4.51276		-470	4.51836		-470	4.53329
-460	6.94448		-460	6.93984		-460	6.96077		-460	4.50007		-460	4.51891		-460	4.5282
-450	6.88209		-450	6.95468		-450	6.99942		-450	4.47695		-450	4.52481		-450	4.5229
-440	6.92388		-440	6.94115		-440	6.97391		-440	4.48174		-440	4.48743		-440	4.53877
-430	6.92996		-430	6.95769		-430	6.98117		-430	4.49328		-430	4.53185		-430	4.52553
-420	6.91885		-420	6.96953		-420	6.99072		-420	4.46227		-420	4.53291		-420	4.52837
-410	6.98562		-410	6.94023		-410	6.97953		-410	4.46918		-410	4.5302		-410	4.52197
-400	6.91074		-400	6.9454		-400	6.97627		-400	4.47016		-400	4.50372		-400	4.52956
-390	6.93088		-390	6.93297		-390	6.99013		-390	4.46778		-390	4.52829		-390	4.55243
-380	6.9038		-380	6.93624		-380	6.94487		-380	4.47674		-380	4.53817		-380	4.53372
-370	6.89066		-370	6.97927		-370	6.99229		-370	4.48866		-370	4.52591		-370	4.54174
-360	6.90596		-360	6.9607		-360	6.98941		-360	4.48904		-360	4.48917		-360	4.53177
-350	6.89857		-350	6.92506		-350	6.99667		-350	4.51399		-350	4.49078		-350	4.55222
-340	6.89426		-340	6.93781		-340	6.94187		-340	4.51132		-340	4.51849		-340	4.5285
-330	6.90099		-330	6.96214		-330	6.95508		-330	4.51679		-330	4.4915		-330	4.55111
-320	6.91688		-320	6.98503		-320	6.96129		-320	4.5002		-320	4.49651		-320	4.5509
-310	6.92055		-310	6.98117		-310	6.97744		-310	4.51216		-310	4.51539		-310	4.5072
-300	6.92336		-300	6.94723		-300	6.96691		-300	4.48717		-300	4.49893		-300	4.53512
-290	6.99294		-290	6.97581		-290	7.02806		-290	4.48004		-290	4.5069		-290	4.52018
-280	7.09326		-280	6.93696		-280	7.01975		-280	4.48123		-280	4.51989		-280	4.52027
-270	7.18678		-270	6.91917		-270	7.04958		-270	4.45094		-270	4.50402		-270	4.50835
-260	7.34949		-260	6.94213		-260	7.05886		-260	4.48234		-260	4.51233		-260	4.50847
-250	7.5517		-250	6.95965		-250	7.11406		-250	4.51972		-250	4.5431		-250	4.53673
-240	7.86194		-240	6.9811		-240	7.20849		-240	4.67026		-240	4.52116		-240	4.53266
-230	8.05506		-230	7.01001		-230	7.28697		-230	4.86599		-230	4.52528		-230	4.57012
-220	8.21842		-220	7.02159		-220	7.41194		-220	5.08862		-220	4.50945		-220	4.66966
-210	8.51493		-210	7.12452		-210	7.49415		-210	5.37421		-210	4.52345		-210	4.71417
-200	8.83002		-200	7.124		-200	7.66058		-200	5.61564		-200	4.52426		-200	4.84621
-190	9.27256		-190	7.31947		-190	7.76882		-190	5.97294		-190	4.59045		-190	5.008
-180	9.75023		-180	7.42456		-180	7.95683		-180	6.38629		-180	4.65278		-180	5.191
-170	10.1449		-170	7.55399		-170	8.06964		-170	6.94064		-170	4.71392		-170	5.36556
-160	10.4445		-160	7.62867		-160	8.17513		-160	7.63089		-160	4.81104		-160	5.5867
-150	10.6921		-150	7.84389		-150	8.28768		-150	8.30132		-150	4.94805		-150	5.82202
-140	10.7059		-140	8.0427		-140	8.38335		-140	8.79669		-140	5.1134		-140	6.03905
-130	10.6909		-130	8.24837		-130	8.44888		-130	9.12765		-130	5.30798		-130	6.18182
-120	10.8		-120	8.42698		-120	8.57791		-120	9.34446		-120	5.58449		-120	6.32193
-110	10.7606		-110	8.6165		-110	8.67359		-110	9.30297		-110	5.82002		-110	6.44039
-100	10.73		-100	8.8325		-100	8.87377		-100	9.19545		-100	6.10133		-100	6.5275
-90	10.6865		-90	9.0081		-90	8.91327		-90	8.99149		-90	6.36482		-90	6.62208
-80	10.6114		-80	9.25327		-80	9.05015		-80	8.74883		-80	6.69645		-80	6.73698
-70	10.6118		-70	9.42428		-70	9.15583		-70	8.42594		-70	6.98642		-70	6.81309
-60	10.6375		-60	9.64173		-60	9.14262		-60	8.00694		-60	7.26196		-60	6.88124
-50	10.4088		-50	9.70314		-50	9.18009		-50	7.41687		-50	7.53483		-50	6.91285
-40	10.1622		-40	9.75735		-40	9.15602		-40	6.8747		-40	7.79166		-40	6.89643
-30	9.75487		-30	9.76442		-30	9.13876		-30	6.28166		-30	8.01305		-30	6.8257
-20	9.30304		-20	9.66953		-20	9.01084		-20	5.88481		-20	8.07046		-20	6.72539
-10	8.81308		-10	9.65082		-10	8.93551		-10	5.52755		-10	8.03075		-10	6.61049
0	8.39519		0	9.5987		0	8.80379		0	5.2815		0	7.84206		0	6.50968
10	8.08168		10	9.51983		10	8.62703		10	5.08947		10	7.61107		10	6.3896
20	7.85174		20	9.49119		20	8.5787		20	4.95025		20	7.4052		20	6.23236
30	7.74985		30	9.33358		30	8.50983		30	4.86561		30	7.10959		30	6.13859
40	7.61637		40	9.2001		40	8.38584		40	4.7465		40	6.86125		40	5.94536
50	7.45425		50	9.00156		50	8.247		50	4.64565		50	6.5502		50	5.76673
60	7.31581		60	8.83904		60	8.16349		60	4.54522		60	6.24895		60	5.62238
70	7.20509		70	8.66469		70	8.02949		70	4.49948		70	5.8986		70	5.37167
80	7.07129		80	8.48858		80	7.87496		80	4.48234		80	5.55102		80	5.19796
90	6.98836		90	8.3037		90	7.76542		90	4.503		90	5.17568		90	5.00965
100	6.93618		100	8.10293		100	7.64351		100	4.50274		100	4.9074		100	4.8648
110	6.90858		110	7.87777		110	7.50827		110	4.50067		110	4.70089		110	4.75537
120	6.90714		120	7.5946		120	7.39664		120	4.49676		120	4.55205		120	4.65812
130	6.86666		130	7.40311		130	7.28828		130	4.50037		130	4.48263		130	4.5837
140	6.90053		140	7.23269		140	7.17383		140	4.51798		140	4.47321		140	4.54691
150	6.92421		150	7.12668		150	7.1344		150	4.5218		150	4.47754		150	4.51721
160	6.92944		160	7.08155		160	7.03996		160	4.47733		160	4.50198		160	4.4786
170	6.9297		170	6.99379		170	7.01053		170	4.48501		170	4.48331		170	4.49761
180	6.96783		180	6.95691		180	7.00746		180	4.49485		180	4.5089		180	4.49748
190	6.96083		190	6.95181		190	6.99654		190	4.47453		190	4.51624		190	4.51361
200	6.93304		200	6.9265		200	6.99418		200	4.50109		200	4.52345		200	4.53083
210	6.94893		210	6.95998		210	6.98261		210	4.49426		210	4.53673		210	4.53143
220	7.02119		220	6.95514		220	6.94827		220	4.50126		220	4.53919		220	4.53346
230	6.9658		230	6.94317		230	6.95841		230	4.52086		230	4.5316		230	4.52595
240	6.9469		240	6.96907		240	6.95599		240	4.50508		240	4.53533		240	4.53805
250	6.93611		250	6.9643		250	6.95547		250	4.50313		250	4.52137		250	4.52511
260	6.90217		260	6.96364		260	6.93618		260	4.48755		260	4.51878		260	4.50236
270	6.92872		270	6.96011		270	6.94899		270	4.50593		270	4.51692		270	4.51021
280	6.88831		280	6.96907		280	6.99026		280	4.48879		280	4.50712		280	4.55829
290	6.91538		290	6.92199		290	6.95952		290	4.51297		290	4.49871		290	4.54657
300	6.87686		300	6.96587		300	6.94121		300	4.50126		300	4.51221		300	4.51615
310	6.92251		310	6.97201		310	6.95632		310	4.48475		310	4.51891		310	4.48514
320	6.85999		320	6.98607		320	6.94716		320	4.4733		320	4.49188		320	4.52358
330	6.90145		330	6.97398		330	6.95658		330	4.45972		330	4.517		330	4.50236
340	6.88399		340	6.96999		340	6.93971		340	4.47211		340	4.5218		340	4.52387
350	6.91747		350	6.95514		350	6.95553		350	4.46833		350	4.52536		350	4.49897
360	6.90864		360	6.9641		360	6.99634		360	4.48026		360	4.52366		360	4.52052
370	6.92512		370	6.93461		370	6.97594		370	4.49553		370	4.49977		370	4.50317
380	6.9384		380	6.90897		380	6.96064		380	4.47228		380	4.51149		380	4.51917
390	6.90322		390	6.93513		390	6.95187		390	4.47466		390	4.51645		390	4.50304
400	6.95671		400	6.95311		400	6.97371		400	4.48518		400	4.52324		400	4.5316
410	6.90204		410	6.96005		410	6.95612		410	4.47886		410	4.50835		410	4.5198
420	6.91518		420	6.93533		420	6.98536		420	4.48675		420	4.52141		420	4.52404
430	6.93251		430	6.97548		430	6.94383		430	4.48726		430	4.52952		430	4.51683
440	6.90067		440	6.97012		440	6.96489		440	4.47466		440	4.52973		440	4.52701
450	6.88046		450	6.95985		450	6.93402		450	4.489		450	4.50003		450	4.53605
460	6.92107		460	6.94272		460	6.95861		460	4.48429		460	4.49426		460	4.5383
470	6.89236		470	6.93323		470	6.94913		470	4.49375		470	4.50979		470	4.52315
480	6.92682		480	6.99445		480	6.96796		480	4.50771		480	4.51492		480	4.54123
490	6.9195		490	6.97705		490	6.9881		490	4.5181		490	4.50856		490	4.53525
500	6.90139		500	6.96574		500	6.95194		500	4.49311		500	4.52315		500	4.49209
510	6.90171		510	6.95822		510	7.00994		510	4.47173		510	4.51874		510	4.52532
520	6.91263		520	6.93788		520	6.95952		520	4.4901		520	4.49986		520	4.50885
530	6.93264		530	6.9471		530	7.00641		530	4.5114		530	4.50491		530	4.5414
540	6.91891		540	6.96064		540	6.94285		540	4.4495		540	4.5439		540	4.51713
550	6.93899		550	6.94298		550	6.96567		550	4.47746		550	4.51178		550	4.49481
560	6.9038		560	6.95481		560	6.94854		560	4.4887		560	4.50563		560	4.52752
570	6.91813		570	6.95887		570	6.93585		570	4.47593		570	4.51853		570	4.5156
580	6.94572		580	6.96201		580	6.95037		580	4.49269		580	4.53368		580	4.52218
590	6.96619		590	6.93945		590	6.95652		590	4.49456		590	4.51361		590	4.50325
600	6.93578		600	6.96338		600	6.93958		600	4.49693		600	4.52795		600	4.51369
610	6.88857		610	6.95861		610	6.94664		610	4.47444		610	4.5125		610	4.5055
620	6.9108		620	6.9522		620	6.9403		620	4.48879		620	4.524		620	4.50962
630	6.92689		630	6.97849		630	6.93153		630	4.51246		630	4.52617		630	4.50563
640	6.91643		640	6.94795		640	6.97345		640	4.50249		640	4.5097		640	4.53359
650	6.91473		650	6.96364		650	6.92748		650	4.49829		650	4.48658		650	4.51997
660	6.8991		660	6.94501		660	6.92454		660	4.48565		660	4.52914		660	4.48713
670	6.93631		670	6.96462		670	6.95573		670	4.51704		670	4.49248		670	4.49685
680	6.93886		680	6.92185		680	6.96626		680	4.51195		680	4.49693		680	4.53223
690	6.95187		690	6.95697		690	6.97685		690	4.49099		690	4.51059		690	4.52023
700	6.91813		700	6.99019		700	6.96547		700	4.51297		700	4.51085		700	4.51972
710	6.95671		710	6.96162		710	6.94082		710	4.48344		710	4.54819		710	4.51675
720	6.92303		720	6.94082		720	6.95743		720	4.48866		720	4.51166		720	4.50436
730	6.94357		730	6.95933		730	6.99758		730	4.4904		730	4.51929		730	4.52621
740	6.92741		740	6.93134		740	6.98634		740	4.49939		740	4.50712		740	4.52188
750	6.94965		750	6.92905		750	6.9709		750	4.49303		750	4.52243		750	4.52735
760	6.9609		760	6.97535		760	6.95429		760	4.49277		760	4.49036		760	4.53202
770	6.90191		770	6.92002		770	6.97241		770	4.46876		770	4.50096		770	4.51577
780	6.91414		780	6.92231		780	6.95311		780	4.50461		780	4.50852		780	4.51424
790	6.92924		790	6.96678		790	6.93748		790	4.50686		790	4.50771		790	4.5327
800	6.94906		800	6.94193		800	6.98941		800	4.50075		800	4.52027		800	4.52477
810	6.88569		810	6.9348		810	6.96574		810	4.46889		810	4.5058		810	4.53105
820	6.89785		820	6.96685		820	6.93278		820	4.49931		820	4.50682		820	4.51204
830	6.94566		830	6.94363		830	6.95723		830	4.5212		830	4.49443		830	4.52158
840	6.91407		840	6.97071		840	6.9951		840	4.49069		840	4.52642		840	4.51577
850	6.95985		850	6.96829		850	6.95403		850	4.50427		850	4.52069		850	4.51976
860	6.90779		860	6.94141		860	6.95043		860	4.4982		860	4.49659		860	4.53007
870	6.92238		870	6.94193		870	6.97143		870	4.4954		870	4.50045		870	4.50775
880	6.93029		880	6.98045		880	6.96927		880	4.47915		880	4.51407		880	4.54314
890	6.92499		890	6.92728		890	6.99726		890	4.50258		890	4.52544		890	4.53406
900	6.90557		900	6.98699		900	6.92767		900	4.47279		900	4.51861		900	4.5139
910	6.89367		910	6.94134		910	6.94775		910	4.46273		910	4.51267		910	4.50117
920	6.91191		920	6.92251		920	6.9864		920	4.48183		920	4.51047		920	4.53032
930	6.89112		930	6.93735		930	6.96619		930	4.46715		930	4.51318		930	4.51564
940	6.96685		940	6.96207		940	6.94899		940	4.49846		940	4.52621		940	4.52735
950	6.92735		950	6.9195		950	6.98673		950	4.49757		950	4.51738		950	4.53122
960	6.93827		960	6.9777		960	6.95854		960	4.48212		960	4.50915		960	4.51547
970	6.93395		970	6.98405		970	6.96096		970	4.50983		970	4.51895		970	4.51085
980	6.93716		980	6.97345		980	6.92761		980	4.51178		980	4.50181		980	4.50427
990	6.91839		990	6.94232		990	6.95782		990	4.49638		990	4.51535		990	4.51747
1000	6.87601		1000	6.96639		1000	6.92414		1000	4.48484		1000	4.4974		1000	4.49727
1010	6.91388		1010	6.98045		1010	6.95488		1010	4.50347		1010	4.52735		1010	4.52379
1020	6.91388		1020	6.95115		1020	6.95311		1020	4.48399		1020	4.52421		1020	4.53075
1030	6.89066		1030	6.96927		1030	6.9828		1030	4.48942		1030	4.53749		1030	4.52489
1040	6.91773		1040	6.94814		1040	6.98274		1040	4.47966		1040	4.51645		1040	4.54076
1050	6.93742		1050	6.94082		1050	6.96031		1050	4.48331		1050	4.49867		1050	4.50376
1060	6.89308		1060	7.00125		1060	6.96704		1060	4.47784		1060	4.52201		1060	4.49647
1070	6.9246		1070	6.93585		1070	6.95181		1070	4.49748		1070	4.52803		1070	4.53291
1080	6.93435		1080	6.95874		1080	7.00615		1080	4.47903		1080	4.53851		1080	4.53232
1090	6.92035		1090	6.96816		1090	6.95939		1090	4.47508		1090	4.51229		1090	4.51382
1100	6.93709		1100	6.93068		1100	6.95403		1100	4.48259		1100	4.50487		1100	4.52723
1110	6.92192		1110	6.97463		1110	6.9503		1110	4.49273		1110	4.50597		1110	4.49765
1120	6.94756		1120	6.9556		1120	6.93788		1120	4.49748		1120	4.53338		1120	4.52701
1130	6.89687		1130	6.97999		1130	6.93775		1130	4.48425		1130	4.51458		1130	4.52018
1140	6.93094		1140	6.94677		1140	6.93657		1140	4.49002		1140	4.51306		1140	4.51628
1150	6.9229		1150	6.97018		1150	6.96959		1150	4.50605		1150	4.53436		1150	4.52693
1160	6.90184		1160	6.97515		1160	6.95011		1160	4.49188		1160	4.50975		1160	4.51526
1170	6.89674		1170	6.95678		1170	6.96639		1170	4.50427		1170	4.50924		1170	4.51751
1180	6.90407		1180	6.942		1180	6.98934		1180	4.48272		1180	4.50444		1180	4.53308
1190	6.90812		1190	6.9537		1190	6.96404		1190	4.48429		1190	4.51577		1190	4.52706
1200	6.93023		1200	6.95148		1200	6.96776		1200	4.5103		1200	4.50932		1200	4.49782
1210	6.90067		1210	6.95344		1210	6.94461		1210	4.48429		1210	4.49846		1210	4.51776
1220	6.92264		1220	6.91394		1220	6.93618		1220	4.49095		1220	4.50966		1220	4.50207
1230	6.93212		1230	6.97005		1230	6.95233		1230	4.47491		1230	4.52871		1230	4.50559
1240	6.94402		1240	6.96037		1240	6.94625		1240	4.47415		1240	4.52994		1240	4.52782
1250	6.92885		1250	6.95455		1250	6.96469		1250	4.48751		1250	4.49562		1250	4.52634
1260	6.93755		1260	6.95233		1260	6.96096		1260	4.49294		1260	4.52404		1260	4.52345
1270	6.92872		1270	6.96077		1270	6.9747		1270	4.50075		1270	4.52082		1270	4.5181
1280	6.91773		1280	6.92611		1280	6.92591		1280	4.4949		1280	4.50728		1280	4.51645
1290	6.92957		1290	6.96201		1290	6.98163		1290	4.4792		1290	4.51721		1290	4.52774
1300	6.92362		1300	6.98451		1300	6.97953		1300	4.50571		1300	4.51369		1300	4.50453
1310	6.91872		1310	6.96279		1310	6.96639		1310	4.48781		1310	4.517		1310	4.56609
1320	6.90786		1320	6.96299		1320	6.96253		1320	4.50648		1320	4.52044		1320	4.5041
1330	6.92048		1330	6.99602		1330	6.96149		1330	4.50151		1330	4.52515		1330	4.52252
1340	6.91296		1340	6.94723		1340	6.94442		1340	4.48658		1340	4.50525		1340	4.52197
1350	6.95122		1350	6.96901		1350	6.98483		1350	4.51721		1350	4.53707		1350	4.52846
1360	6.94945		1360	6.96064		1360	6.98418		1360	4.50779		1360	4.52392		1360	4.50588
1370	6.94775		1370	6.97175		1370	6.90256		1370	4.51017		1370	4.52595		1370	4.49269
1380	6.97123		1380	6.93147		1380	6.95933		1380	4.51327		1380	4.49099		1380	4.51874
1390	6.91028		1390	6.95292		1390	6.95089		1390	4.48055		1390	4.50185		1390	4.52006
1400	6.94618		1400	6.96064		1400	6.97456		1400	4.51721		1400	4.49422		1400	4.53215
1410	6.94219		1410	6.95004		1410	6.93219		1410	4.49642		1410	4.51912		1410	4.50461
1420	6.93186		1420	6.94742		1420	6.97568		1420	4.49999		1420	4.5271		1420	4.51518
1430	6.89982		1430	6.93984		1430	6.93461		1430	4.46863		1430	4.5125		1430	4.5125
1440	6.93179		1440	6.92689		1440	6.91322		1440	4.46808		1440	4.52167		1440	4.53028
1450	6.92689		1450	6.9418		1450	6.98725		1450	4.50376		1450	4.49392		1450	4.51878
1460	6.86999		1460	6.97332		1460	6.97077		1460	4.49999		1460	4.52808		1460	4.50801
1470	6.95063		1470	6.92519		1470	6.98169		1470	4.47474		1470	4.5125		1470	4.52914
1480	6.91401		1480	6.94383		1480	6.96757		1480	4.47487		1480	4.50185		1480	4.50376
1490	6.92571		1490	6.97273		1490	6.96737		1490	4.49324		1490	4.52099		1490	4.53232
1500	6.87013		1500	6.95436		1500	6.97012		1500	4.50313		1500	4.49341		1500	4.54534
1510	6.94657		1510	6.99575		1510	6.97352		1510	4.50461		1510	4.53049		1510	4.53847
1520	6.91015		1520	6.94474		1520	6.96018		1520	4.49243		1520	4.51573		1520	4.52977
1530	6.89766		1530	6.95455		1530	6.95606		1530	4.46948		1530	4.49277		1530	4.50084
1540	6.91368		1540	6.92257		1540	6.95148		1540	4.47924		1540	4.48492		1540	4.50644
1550	6.92362		1550	6.97254		1550	6.96541		1550	4.47724		1550	4.51102		1550	4.52943
1560	6.92061		1560	6.92833		1560	6.93873		1560	4.47843		1560	4.51972		1560	4.51166
1570	6.89328		1570	6.95508		1570	6.96554		1570	4.49146		1570	4.51679		1570	4.52689
1580	6.92002		1580	6.99275		1580	6.9747		1580	4.50835		1580	4.51713		1580	4.53495
1590	6.93899		1590	6.95455		1590	6.9437		1590	4.49201		1590	4.53703		1590	4.50868
1600	6.92009		1600	6.94527		1600	6.96312		1600	4.49689		1600	4.52986		1600	4.51195
1610	6.95462		1610	6.93892		1610	6.94906		1610	4.49422		1610	4.50593		1610	4.51055
1620	6.9369		1620	6.96149		1620	6.96279		1620	4.49307		1620	4.51182		1620	4.52642
1630	6.94337		1630	6.97725		1630	6.9401		1630	4.51153		1630	4.52243		1630	4.48471
1640	6.93709		1640	6.93389		1640	6.9554		1640	4.4887		1640	4.48352		1640	4.54229
1650	6.92597		1650	6.90204		1650	7.01433		1650	4.49303		1650	4.48968		1650	4.53291
1660	6.91996		1660	6.92951		1660	6.93448		1660	4.49027		1660	4.49982		1660	4.51416
1670	6.92074		1670	6.95848		1670	6.99549		1670	4.49362		1670	4.49765		1670	4.53546
1680	6.90505		1680	6.94232		1680	6.94808		1680	4.48929		1680	4.51768		1680	4.53639
1690	6.91152		1690	6.91486		1690	6.97463		1690	4.48391		1690	4.5086		1690	4.52341
1700	6.94899		1700	6.976		1700	6.96031		1700	4.50788		1700	4.48594		1700	4.51153
1710	6.93833		1710	6.94821		1710	6.97411		1710	4.50686		1710	4.48535		1710	4.52167
1720	6.88948		1720	6.92427		1720	6.95933		1720	4.48081		1720	4.49324		1720	4.52812
1730	6.8853		1730	6.9401		1730	6.96495		1730	4.48208		1730	4.51017		1730	4.50843
1740	6.89256		1740	6.92604		1740	6.96122		1740	4.47372		1740	4.52133		1740	4.49999
1750	6.89386		1750	6.94141		1750	6.97332		1750	4.48038		1750	4.52778		1750	4.5254
1760	6.93297		1760	6.96214		1760	6.9229		1760	4.49944		1760	4.50279		1760	4.51009
1770	6.91806		1770	6.94461		1770	6.94075		1770	4.47788		1770	4.53245		1770	4.51747
1780	6.91649		1780	6.93775		1780	6.952		1780	4.47529		1780	4.48794		1780	4.51938
1790	6.93696		1790	6.93977		1790	6.96201		1790	4.48034		1790	4.49952		1790	4.52371
1800	6.91466		1800	6.94841		1800	6.98333		1800	4.48887		1800	4.51772		1800	4.53321
1810	6.89328		1810	6.96345		1810	6.94559		1810	4.48174		1810	4.50474		1810	4.50835
1820	6.92002		1820	6.94533		1820	6.94671		1820	4.49044		1820	4.49927		1820	4.52786
1830	6.93899		1830	6.95325		1830	6.96482		1830	4.46948		1830	4.51446		1830	4.50028
1840	6.92009		1840	6.98182		1840	6.96986		1840	4.47924		1840	4.53177		1840	4.52167
1850	6.95462		1850	6.92794		1850	6.97548		1850	4.47724		1850	4.49812		1850	4.50987
1860	6.9369		1860	6.93918		1860	6.97097		1860	4.47843		1860	4.50678		1860	4.52982
1870	6.94337		1870	6.98889		1870	6.93925		1870	4.49146		1870	4.52269		1870	4.52595
1880	6.93709		1880	6.94095		1880	6.96495		1880	4.50835		1880	4.50236		1880	4.52583
1890	6.92597		1890	6.93539		1890	6.96829		1890	4.49201		1890	4.51463		1890	4.51471
1900	6.91996		1900	6.97149		1900	6.95553		1900	4.49689		1900	4.50584		1900	4.50181
1910	6.92074		1910	6.95279		1910	6.9985		1910	4.49422		1910	4.5097		1910	4.52587
1920	6.90505		1920	6.94252		1920	6.94154		1920	4.49307		1920	4.51891		1920	4.52116
1930	6.91152		1930	6.92395		1930	6.97286		1930	4.51153		1930	4.51034		1930	4.52099
1940	6.94899		1940	6.96024		1940	6.90269		1940	4.4887		1940	4.5218		1940	4.48649
1950	6.93833		1950	6.95226		1950	6.91531		1950	4.49303		1950	4.51768		1950	4.52481
1960	6.88948		1960	6.93166		1960	6.95795		1960	4.49027		1960	4.48505		1960	4.53109
1970	6.8853		1970	6.96489		1970	6.91479		1970	4.49362		1970	4.51997		1970	4.49061
1980	6.89256		1980	6.94121		1980	6.96744		1980	4.48929		1980	4.49982		1980	4.52044
1990	6.89386		1990	6.96809		1990	6.97005		1990	4.48391		1990	4.52235		1990	4.51895
2000	6.93297		2000	6.93958		2000	6.95808		2000	4.50788		2000	4.47945		2000	4.50941
2010	6.91806		2010	6.93219		2010	6.96214		2010	4.50686		2010	4.52252		2010	4.50796
2020	6.91649		2020	6.92624		2020	6.99713		2020	4.48081		2020	4.49854		2020	4.53431
2030	6.93696		2030	6.9626		2030	6.9452		2030	4.48208		2030	4.50686		2030	4.50287
2040	6.91466		2040	6.98784		2040	6.95887		2040	4.47372		2040	4.52841		2040	4.51993
2050	6.89328		2050	6.93879		2050	6.94834		2050	4.48038		2050	4.50219		2050	4.52201
2060	6.92002		2060	6.95141		2060	6.99948		2060	4.49944		2060	4.51068		2060	4.54865
2070	6.93899		2070	6.94435		2070	6.95612		2070	4.47788		2070	4.50958		2070	4.51793
2080	6.92009		2080	6.99052		2080	6.98562		2080	4.47529		2080	4.5302		2080	4.50915
2090	6.95462		2090	6.92565		2090	6.94376		2090	4.48034		2090	4.50644		2090	4.52969
2100	6.9369		2100	6.96018		2100	6.96495		2100	4.48887		2100	4.52286		2100	4.50164
2110	6.94337		2110	6.95109		2110	6.93748		2110	4.48174		2110	4.50173		2110	4.52082
2120	6.93709		2120	6.93552		2120	6.92807		2120	4.49044		2120	4.50444		2120	4.50852
2130	6.92597		2130	6.94206		2130	6.95109		2130	4.46948		2130	4.50529		2130	4.52536
2140	6.91996		2140	6.95527		2140	6.97633		2140	4.47924		2140	4.4982		2140	4.49952
2150	6.92074		2150	6.92257		2150	6.95449		2150	4.47724		2150	4.49316		2150	4.53906
2160	6.90505		2160	6.95325		2160	6.94592		2160	4.47843		2160	4.52048		2160	4.51339
2170	6.91152		2170	6.91996		2170	6.98195		2170	4.49146		2170	4.50402		2170	4.52218
2180	6.94899		2180	6.92624		2180	6.93977		2180	4.50835		2180	4.48259		2180	4.51806
2190	6.93833		2190	6.93899		2190	6.92264		2190	4.49201		2190	4.48382		2190	4.5058
2200	6.88948		2200	6.95527		2200	6.98967		2200	4.49689		2200	4.51832		2200	4.51051
2210	6.8853		2210	6.91329		2210	6.94625		2210	4.49422		2210	4.50924		2210	4.51955
2220	6.89256		2220	6.9575		2220	6.98326		2220	4.49307		2220	4.50398		2220	4.51115
2230	6.89386		2230	6.97273		2230	6.95331		2230	4.51153		2230	4.50911		2230	4.51255
2240	6.93297		2240	6.90583		2240	6.95828		2240	4.4887		2240	4.50601		2240	4.52303
2250	6.91806		2250	6.93807		2250	6.99144		2250	4.49303		2250	4.50712		2250	4.56087
2260	6.91649		2260	6.94239		2260	6.94304		2260	4.49027		2260	4.48921		2260	4.50796
2270	6.93696		2270	6.95534		2270	6.92663		2270	4.49362		2270	4.53189		2270	4.49154
2280	6.91466		2280	6.96103		2280	6.93775		2280	4.48929		2280	4.51721		2280	4.50792
2290	6.89328		2290	6.98392		2290	6.97071		2290	4.48391		2290	4.52311		2290	4.49935
2300	6.92002		2300	6.92035		2300	6.93755		2300	4.50788		2300	4.5013		2300	4.53694
2310	6.93899		2310	6.94618		2310	6.9418		2310	4.50686		2310	4.50033		2310	4.50325
2320	6.92009		2320	6.97012		2320	6.94742		2320	4.48081		2320	4.52078		2320	4.51471
2330	6.95462		2330	6.93879		2330	6.96966		2330	4.48208		2330	4.49659		2330	4.51191
2340	6.9369		2340	6.91204		2340	6.94886		2340	4.47372		2340	4.49061		2340	4.51102
2350	6.94337		2350	6.94612		2350	6.97842		2350	4.48038		2350	4.49137		2350	4.53525
2360	6.93709		2360	6.9335		2360	6.9777		2360	4.49944		2360	4.50818		2360	4.50788
2370	6.92597		2370	6.97077		2370	6.92852		2370	4.47788		2370	4.50347		2370	4.50813
2380	6.91996		2380	6.91375		2380	6.92584		2380	4.47529		2380	4.50966		2380	4.49451
2390	6.92074		2390	6.96299		2390	6.95619		2390	4.48034		2390	4.51365		2390	4.49566
2400	6.90505		2400	6.92748		2400	6.94193		2400	4.48887		2400	4.49184		2400	4.51895
2410	6.91152		2410	6.9348		2410	6.95952		2410	4.48174		2410	4.50567		2410	4.52074
2420	6.94899		2420	6.98117		2420	6.96737		2420	4.49044		2420	4.51025		2420	4.51276
2430	6.93833		2430	6.93212		2430	6.96214		2430	4.46948		2430	4.50673		2430	4.51675
2440	6.88948		2440	6.94023		2440	6.92002		2440	4.47924		2440	4.51509		2440	4.50894
2450	6.8853		2450	6.96868		2450	6.96763		2450	4.47724		2450	4.50835		2450	4.49625
2460	6.89256		2460	6.9403		2460	6.96005		2460	4.47843		2460	4.51484		2460	4.55472
2470	6.89386		2470	6.9505		2470	6.98352		2470	4.49146		2470	4.5139		2470	4.53037
2480	6.93297		2480	6.93546		2480	6.93683		2480	4.50835		2480	4.51518		2480	4.5097
2490	6.91806		2490	6.95737		2490	6.96377		2490	4.49201		2490	4.49659		2490	4.51946
2500	6.91649		2500	6.94991		2500	6.95822		2500	4.49689		2500	4.51704		2500	4.51327
2510	6.93696		2510	6.9622		2510	6.96018		2510	4.49422		2510	4.5097		2510	4.52684
2520	6.91466		2520	6.95148		2520	6.96502		2520	4.49307		2520	4.51658		2520	4.50618
2530	6.89328		2530	6.95115		2530	6.94317		2530	4.51153		2530	4.49383		2530	4.51361
2540	6.92002		2540	6.9418		2540	6.9571		2540	4.4887		2540	4.51683		2540	4.51199
2550	6.93899		2550	6.94317		2550	6.99065		2550	4.49303		2550	4.50279		2550	4.54344
2560	6.92009		2560	6.93173		2560	6.97744		2560	4.49027		2560	4.51132		2560	4.5128
2570	6.95462		2570	6.95233		2570	6.96024		2570	4.49362		2570	4.50979		2570	4.53707
2580	6.9369		2580	6.93703		2580	6.96678		2580	4.48929		2580	4.50762		2580	4.51178
2590	6.94337		2590	6.95468		2590	6.96129		2590	4.48391		2590	4.50559		2590	4.5047
2600	6.93709		2600	6.95632		2600	6.95599		2600	4.50788		2600	4.51577		2600	4.51272
2610	6.92597		2610	6.94396		2610	6.96796		2610	4.50686		2610	4.51051		2610	4.5389
2620	6.91996		2620	6.93088		2620	6.9556		2620	4.48081		2620	4.50096		2620	4.52027
2630	6.92074		2630	6.94075		2630	6.96305		2630	4.48208		2630	4.49685		2630	4.50979
2640	6.90505		2640	6.95455		2640	6.9537		2640	4.47372		2640	4.50398		2640	4.51704
2650	6.91152		2650	6.9537		2650	6.93127		2650	4.48038		2650	4.517		2650	4.52998
2660	6.94899		2660	6.97999		2660	6.98333		2660	4.49944		2660	4.51603		2660	4.53461
2670	6.93833		2670	6.94638		2670	6.98483		2670	4.47788		2670	4.50181		2670	4.54089
2680	6.88948		2680	6.91224		2680	6.9694		2680	4.47529		2680	4.50805		2680	4.51679
2690	6.8853		2690	6.9537		2690	6.97993		2690	4.48034		2690	4.52167		2690	4.50919
2700	6.89256		2700	6.959		2700	6.99118		2700	4.48887		2700	4.50868		2700	4.52315
2710	6.89386		2710	6.96135		2710	6.97352		2710	4.48174		2710	4.51191		2710	4.51972
2720	6.93297		2720	6.94389		2720	7.00072		2720	4.49044		2720	4.50011		2720	4.54585
2730	6.91806		2730	6.92179		2730	6.96547		2730	4.46948		2730	4.50325		2730	4.52511
2740	6.91649		2740	6.93395		2740	6.94644		2740	4.47924		2740	4.50525		2740	4.51297
2750	6.93696		2750	6.95468		2750	6.92454		2750	4.47724		2750	4.51577		2750	4.49002
2760	6.91466		2760	6.94337		2760	6.90309		2760	4.47843		2760	4.4929		2760	4.50992
2770	6.89328		2770	6.97358		2770	6.94304		2770	4.49146		2770	4.51547		2770	4.52286

## Sheet: Sheet5
	pY-Caprin1, 480 mM NaCl
	220K			240K			260K			220K			240K			260K
	Z (angstorm)	[Cl-] (mg/ml)		Z (angstorm)	[Cl-] (mg/ml)		Z (angstorm)	[Cl-] (mg/ml)		Z (angstorm)	[Na+] (mg/ml)		Z (angstorm)	[Na+] (mg/ml)		Z (angstorm)	[Na+] (mg/ml)
	-1160	16.2029		-1160	16.325		-1160	16.4873		-1160	10.5408		-1160	10.6086		-1160	10.6803
	-1150	16.2103		-1150	16.367		-1150	16.4436		-1150	10.5014		-1150	10.6154		-1150	10.6729
	-1140	16.2266		-1140	16.3364		-1140	16.4718		-1140	10.4981		-1140	10.5915		-1140	10.6623
	-1130	16.1717		-1130	16.3672		-1130	16.4427		-1130	10.531		-1130	10.6171		-1130	10.7095
	-1120	16.2083		-1120	16.3799		-1120	16.4548		-1120	10.5107		-1120	10.6279		-1120	10.6922
	-1110	16.2051		-1110	16.3342		-1110	16.5117		-1110	10.5133		-1110	10.6253		-1110	10.6874
	-1100	16.1933		-1100	16.3359		-1100	16.4489		-1100	10.4968		-1100	10.5973		-1100	10.6818
	-1090	16.2386		-1090	16.3959		-1090	16.4833		-1090	10.53		-1090	10.6092		-1090	10.6835
	-1080	16.1637		-1080	16.3452		-1080	16.4402		-1080	10.5001		-1080	10.6138		-1080	10.6698
	-1070	16.2512		-1070	16.3694		-1070	16.4476		-1070	10.5301		-1070	10.6286		-1070	10.6575
	-1060	16.17		-1060	16.3186		-1060	16.4319		-1060	10.4984		-1060	10.5849		-1060	10.6917
	-1050	16.207		-1050	16.3452		-1050	16.4906		-1050	10.516		-1050	10.6087		-1050	10.6906
	-1040	16.1921		-1040	16.3788		-1040	16.4355		-1040	10.4853		-1040	10.6062		-1040	10.688
	-1030	16.2034		-1030	16.3916		-1030	16.4698		-1030	10.524		-1030	10.63		-1030	10.6764
	-1020	16.191		-1020	16.3267		-1020	16.4699		-1020	10.494		-1020	10.6145		-1020	10.689
	-1010	16.2506		-1010	16.3486		-1010	16.4591		-1010	10.5591		-1010	10.6015		-1010	10.6554
	-1000	16.2477		-1000	16.353		-1000	16.3961		-1000	10.556		-1000	10.6319		-1000	10.6608
	-990	16.236		-990	16.3345		-990	16.4923		-990	10.5082		-990	10.5918		-990	10.6872
	-980	16.1394		-980	16.3203		-980	16.4974		-980	10.4964		-980	10.5724		-980	10.6934
	-970	16.2331		-970	16.3502		-970	16.4859		-970	10.5096		-970	10.589		-970	10.7323
	-960	16.1818		-960	16.3305		-960	16.4788		-960	10.5134		-960	10.6088		-960	10.6992
	-950	16.1574		-950	16.3822		-950	16.4835		-950	10.4955		-950	10.6379		-950	10.6727
	-940	16.193		-940	16.327		-940	16.4947		-940	10.4915		-940	10.6154		-940	10.6805
	-930	16.1653		-930	16.3856		-930	16.41		-930	10.4871		-930	10.616		-930	10.6769
	-920	16.2417		-920	16.3474		-920	16.4737		-920	10.5413		-920	10.617		-920	10.6978
	-910	16.2469		-910	16.333		-910	16.435		-910	10.5215		-910	10.5647		-910	10.6803
	-900	16.1598		-900	16.3725		-900	16.4797		-900	10.4898		-900	10.6422		-900	10.6857
	-890	16.1594		-890	16.3512		-890	16.469		-890	10.4989		-890	10.6228		-890	10.6745
	-880	16.2066		-880	16.3919		-880	16.4608		-880	10.4982		-880	10.643		-880	10.6583
	-870	16.2044		-870	16.3655		-870	16.428		-870	10.5242		-870	10.5845		-870	10.6682
	-860	16.2399		-860	16.3599		-860	16.4916		-860	10.5183		-860	10.6286		-860	10.6811
	-850	16.1889		-850	16.3242		-850	16.4358		-850	10.5258		-850	10.5786		-850	10.694
	-840	16.167		-840	16.3595		-840	16.411		-840	10.4841		-840	10.6075		-840	10.6577
	-830	16.2057		-830	16.3382		-830	16.5266		-830	10.499		-830	10.6044		-830	10.7253
	-820	16.222		-820	16.3065		-820	16.4814		-820	10.5303		-820	10.6256		-820	10.6639
	-810	16.2473		-810	16.3355		-810	16.4194		-810	10.5417		-810	10.5734		-810	10.6458
	-800	16.1691		-800	16.3513		-800	16.4645		-800	10.5008		-800	10.5955		-800	10.6834
	-790	16.1785		-790	16.3507		-790	16.5075		-790	10.5323		-790	10.6068		-790	10.7125
	-780	16.2604		-780	16.3312		-780	16.389		-780	10.5178		-780	10.593		-780	10.6802
	-770	16.1971		-770	16.2649		-770	16.4599		-770	10.5206		-770	10.568		-770	10.6678
	-760	16.2529		-760	16.3499		-760	16.4467		-760	10.531		-760	10.595		-760	10.6537
	-750	16.1989		-750	16.352		-750	16.4811		-750	10.4994		-750	10.6226		-750	10.6885
	-740	16.1911		-740	16.3709		-740	16.4347		-740	10.5168		-740	10.6246		-740	10.6648
	-730	16.1683		-730	16.3332		-730	16.4818		-730	10.4725		-730	10.5972		-730	10.7127
	-720	16.1414		-720	16.3871		-720	16.4624		-720	10.5047		-720	10.6427		-720	10.6849
	-710	16.1809		-710	16.3736		-710	16.465		-710	10.4965		-710	10.6289		-710	10.6829
	-700	16.2308		-700	16.3835		-700	16.5432		-700	10.5198		-700	10.6027		-700	10.7318
	-690	16.2148		-690	16.3667		-690	16.4483		-690	10.5166		-690	10.6032		-690	10.6808
	-680	16.1775		-680	16.3365		-680	16.4675		-680	10.4986		-680	10.6245		-680	10.6791
	-670	16.2572		-670	16.2853		-670	16.4822		-670	10.5406		-670	10.5694		-670	10.6749
	-660	16.207		-660	16.3669		-660	16.4821		-660	10.5396		-660	10.6112		-660	10.7119
	-650	16.2035		-650	16.3488		-650	16.5005		-650	10.5106		-650	10.6054		-650	10.7238
	-640	16.2257		-640	16.3555		-640	16.5123		-640	10.5285		-640	10.6229		-640	10.7092
	-630	16.2233		-630	16.3312		-630	16.4937		-630	10.4965		-630	10.5802		-630	10.6792
	-620	16.1944		-620	16.3864		-620	16.4773		-620	10.5134		-620	10.6307		-620	10.7205
	-610	16.2291		-610	16.3684		-610	16.5121		-610	10.5274		-610	10.6448		-610	10.6835
	-600	16.1996		-600	16.3333		-600	16.4684		-600	10.5221		-600	10.5899		-600	10.6782
	-590	16.2129		-590	16.3754		-590	16.391		-590	10.5106		-590	10.6096		-590	10.658
	-580	16.2144		-580	16.3231		-580	16.4752		-580	10.5032		-580	10.6017		-580	10.7008
	-570	16.1813		-570	16.43		-570	16.4028		-570	10.5112		-570	10.6293		-570	10.6632
	-560	16.2053		-560	16.3141		-560	16.4594		-560	10.5071		-560	10.615		-560	10.6393
	-550	16.208		-550	16.3516		-550	16.4797		-550	10.5393		-550	10.6082		-550	10.7053
	-540	16.2193		-540	16.3352		-540	16.4465		-540	10.5067		-540	10.5939		-540	10.6564
	-530	16.1518		-530	16.3401		-530	16.5057		-530	10.4869		-530	10.5946		-530	10.7054
	-520	16.1908		-520	16.3489		-520	16.4591		-520	10.4866		-520	10.5976		-520	10.6885
	-510	16.1641		-510	16.2855		-510	16.4035		-510	10.5085		-510	10.5924		-510	10.6757
	-500	16.2166		-500	16.335		-500	16.4703		-500	10.5231		-500	10.5771		-500	10.6756
	-490	16.1846		-490	16.3164		-490	16.4777		-490	10.4803		-490	10.6007		-490	10.6905
	-480	16.2507		-480	16.3522		-480	16.4726		-480	10.5353		-480	10.5905		-480	10.6801
	-470	16.192		-470	16.2919		-470	16.4458		-470	10.5231		-470	10.5912		-470	10.6775
	-460	16.1584		-460	16.369		-460	16.4718		-460	10.4841		-460	10.5859		-460	10.6877
	-450	16.1952		-450	16.3397		-450	16.5036		-450	10.5118		-450	10.6316		-450	10.7043
	-440	16.1927		-440	16.3304		-440	16.5349		-440	10.5293		-440	10.6173		-440	10.7115
	-430	16.2066		-430	16.2974		-430	16.5032		-430	10.4857		-430	10.5541		-430	10.7123
	-420	16.214		-420	16.3575		-420	16.4364		-420	10.5103		-420	10.6241		-420	10.6862
	-410	16.1587		-410	16.3675		-410	16.4793		-410	10.5019		-410	10.6233		-410	10.6881
	-400	16.1749		-400	16.3612		-400	16.4508		-400	10.4863		-400	10.5883		-400	10.6683
	-390	16.2515		-390	16.3832		-390	16.4679		-390	10.542		-390	10.6412		-390	10.6883
	-380	16.2099		-380	16.3896		-380	16.45		-380	10.5013		-380	10.628		-380	10.651
	-370	16.1729		-370	16.3065		-370	16.4458		-370	10.5087		-370	10.5913		-370	10.6819
	-360	16.2332		-360	16.4092		-360	16.4634		-360	10.5442		-360	10.6435		-360	10.6886
	-350	16.1781		-350	16.3812		-350	16.4732		-350	10.5125		-350	10.6458		-350	10.6925
	-340	16.2641		-340	16.4525		-340	16.4442		-340	10.5423		-340	10.633		-340	10.677
	-330	16.2752		-330	16.3552		-330	16.4288		-330	10.5385		-330	10.6318		-330	10.6457
	-320	16.2305		-320	16.4102		-320	16.4901		-320	10.5165		-320	10.651		-320	10.7104
	-310	16.2291		-310	16.3563		-310	16.4666		-310	10.5563		-310	10.6385		-310	10.6912
	-300	16.2056		-300	16.3894		-300	16.4805		-300	10.5249		-300	10.6376		-300	10.7017
	-290	16.2108		-290	16.4624		-290	16.4538		-290	10.5302		-290	10.6599		-290	10.6774
	-280	16.1666		-280	16.3971		-280	16.5226		-280	10.4929		-280	10.626		-280	10.7281
	-270	16.1876		-270	16.425		-270	16.5376		-270	10.5033		-270	10.661		-270	10.7292
	-260	16.2624		-260	16.3983		-260	16.4802		-260	10.5213		-260	10.7096		-260	10.6914
	-250	16.2349		-250	16.4683		-250	16.4429		-250	10.5102		-250	10.6689		-250	10.685
	-240	16.1932		-240	16.4298		-240	16.5317		-240	10.5051		-240	10.6502		-240	10.6821
	-230	16.2536		-230	16.4149		-230	16.5015		-230	10.5835		-230	10.66		-230	10.7165
	-220	16.2868		-220	16.4517		-220	16.5126		-220	10.558		-220	10.6519		-220	10.7294
	-210	16.3157		-210	16.5451		-210	16.4538		-210	10.5555		-210	10.6544		-210	10.6635
	-200	16.5958		-200	16.6972		-200	16.5525		-200	10.5607		-200	10.6948		-200	10.7265
	-190	16.8791		-190	16.9511		-190	16.561		-190	10.5663		-190	10.6841		-190	10.708
	-180	17.4321		-180	17.3015		-180	16.6483		-180	10.748		-180	10.7809		-180	10.7052
	-170	18.1163		-170	17.7821		-170	16.9186		-170	11.0032		-170	10.9789		-170	10.7426
	-160	18.7687		-160	18.3986		-160	17.1061		-160	11.495		-160	11.34		-160	10.7638
	-150	19.5606		-150	18.9073		-150	17.5307		-150	12.1692		-150	11.8215		-150	10.8733
	-140	20.2918		-140	19.4171		-140	18.004		-140	12.9415		-140	12.4063		-140	11.1036
	-130	21.1811		-130	20.1665		-130	18.4936		-130	13.7641		-130	13.0433		-130	11.4786
	-120	22.1379		-120	20.7901		-120	19.0241		-120	14.6458		-120	13.7248		-120	11.9641
	-110	23.1566		-110	21.4361		-110	19.4231		-110	15.4786		-110	14.477		-110	12.5959
	-100	24.2907		-100	21.9735		-100	19.7982		-100	16.4165		-100	15.0731		-100	13.3484
	-90	25.3391		-90	22.4923		-90	19.9577		-90	17.4877		-90	15.7529		-90	13.9529
	-80	25.7377		-80	22.767		-80	20.271		-80	18.6232		-80	16.3701		-80	14.4845
	-70	25.8148		-70	23.0267		-70	20.5398		-70	19.5674		-70	16.885		-70	14.7827
	-60	25.8155		-60	23.1364		-60	20.8495		-60	20.0339		-60	17.2106		-60	14.9164
	-50	25.9996		-50	23.1774		-50	21.092		-50	20.0678		-50	17.3797		-50	14.9273
	-40	26.0066		-40	23.2376		-40	21.3225		-40	19.5972		-40	17.408		-40	14.9657
	-30	25.7951		-30	23.2099		-30	21.4433		-30	19.006		-30	17.2525		-30	14.9577
	-20	25.3894		-20	23.1333		-20	21.4373		-20	18.3425		-20	16.9796		-20	14.999
	-10	24.6011		-10	22.9098		-10	21.4878		-10	17.7743		-10	16.5553		-10	15.1153
	0	23.8269		0	22.5367		0	21.382		0	17.0611		0	15.9588		0	15.2244
	10	23.1066		10	22.1202		10	21.2627		10	16.1693		10	15.3893		10	15.3385
	20	22.4267		20	21.5867		20	21.0329		20	14.9441		20	14.7254		20	15.4239
	30	21.8113		30	20.9844		30	20.8505		30	13.507		30	14.0773		30	15.321
	40	20.8034		40	20.3997		40	20.7501		40	12.3443		40	13.3291		40	15.1092
	50	19.6379		50	19.8299		50	20.6382		50	11.5032		50	12.6127		50	14.5957
	60	18.3808		60	19.2165		60	20.4618		60	10.9405		60	11.9634		60	14.0153
	70	17.536		70	18.5338		70	20.1653		70	10.7119		70	11.4408		70	13.2692
	80	16.8489		80	17.9386		80	19.665		80	10.6227		80	11.0557		80	12.599
	90	16.4791		90	17.5037		90	19.0921		90	10.5517		90	10.8654		90	12.1051
	100	16.3179		100	17.0367		100	18.5328		100	10.5476		100	10.7259		100	11.7389
	110	16.2222		110	16.7442		110	18.0009		110	10.5288		110	10.6681		110	11.3791
	120	16.2536		120	16.5971		120	17.7081		120	10.5392		120	10.7014		120	11.1902
	130	16.2719		130	16.4796		130	17.34		130	10.5323		130	10.6457		130	10.9473
	140	16.29		140	16.3913		140	17.115		140	10.5413		140	10.6457		140	10.8707
	150	16.2558		150	16.4477		150	16.8345		150	10.53		150	10.6445		150	10.7665
	160	16.2789		160	16.3463		160	16.7399		160	10.563		160	10.6112		160	10.7379
	170	16.1732		170	16.3646		170	16.625		170	10.4995		170	10.6329		170	10.7328
	180	16.1723		180	16.3765		180	16.554		180	10.521		180	10.6005		180	10.7046
	190	16.2037		190	16.3818		190	16.5073		190	10.5206		190	10.6033		190	10.6988
	200	16.2241		200	16.3741		200	16.4887		200	10.5185		200	10.6425		200	10.6969
	210	16.1522		210	16.3321		210	16.4686		210	10.4839		210	10.594		210	10.6884
	220	16.2514		220	16.3614		220	16.5093		220	10.5113		220	10.6325		220	10.7218
	230	16.1647		230	16.3779		230	16.4557		230	10.4851		230	10.6235		230	10.6916
	240	16.1999		240	16.3683		240	16.4571		240	10.5199		240	10.6157		240	10.6738
	250	16.1953		250	16.3427		250	16.502		250	10.541		250	10.6066		250	10.6838
	260	16.2441		260	16.421		260	16.5007		260	10.5182		260	10.6254		260	10.7051
	270	16.2133		270	16.3464		270	16.4961		270	10.5342		270	10.6155		270	10.6974
	280	16.2274		280	16.3515		280	16.3947		280	10.5053		280	10.6377		280	10.6657
	290	16.2151		290	16.3949		290	16.4706		290	10.5185		290	10.633		290	10.6991
	300	16.1796		300	16.3555		300	16.4998		300	10.5046		300	10.6018		300	10.7026
	310	16.2013		310	16.3206		310	16.5011		310	10.5058		310	10.6256		310	10.6922
	320	16.2284		320	16.3598		320	16.4882		320	10.5416		320	10.5946		320	10.7069
	330	16.2541		330	16.3808		330	16.4888		330	10.5513		330	10.6223		330	10.6763
	340	16.196		340	16.3803		340	16.4858		340	10.4982		340	10.6166		340	10.6928
	350	16.2322		350	16.3697		350	16.5086		350	10.5353		350	10.6157		350	10.7536
	360	16.1811		360	16.3365		360	16.5017		360	10.513		360	10.6385		360	10.6835
	370	16.2376		370	16.3321		370	16.5164		370	10.5174		370	10.5862		370	10.7114
	380	16.1746		380	16.376		380	16.5141		380	10.5107		380	10.6075		380	10.7186
	390	16.2127		390	16.3488		390	16.5327		390	10.493		390	10.5945		390	10.7323
	400	16.2259		400	16.3588		400	16.5113		400	10.5237		400	10.6246		400	10.7128
	410	16.1577		410	16.376		410	16.4735		410	10.4899		410	10.6519		410	10.7048
	420	16.2226		420	16.3725		420	16.489		420	10.5105		420	10.6232		420	10.7172
	430	16.1855		430	16.3664		430	16.4515		430	10.5274		430	10.6058		430	10.6599
	440	16.176		440	16.3762		440	16.5483		440	10.5		440	10.638		440	10.7337
	450	16.2369		450	16.4122		450	16.492		450	10.5163		450	10.6233		450	10.7033
	460	16.1489		460	16.3559		460	16.5092		460	10.4832		460	10.6435		460	10.718
	470	16.1966		470	16.413		470	16.458		470	10.51		470	10.6291		470	10.6729
	480	16.1775		480	16.3539		480	16.4304		480	10.5255		480	10.611		480	10.6846
	490	16.2159		490	16.392		490	16.516		490	10.5061		490	10.6314		490	10.7006
	500	16.2407		500	16.3196		500	16.4616		500	10.5236		500	10.6194		500	10.6798
	510	16.1517		510	16.3782		510	16.5081		510	10.5027		510	10.5915		510	10.706
	520	16.2202		520	16.3207		520	16.4714		520	10.4949		520	10.6157		520	10.6853
	530	16.1619		530	16.4032		530	16.4905		530	10.5087		530	10.6338		530	10.6864
	540	16.2617		540	16.3544		540	16.4385		540	10.5372		540	10.6009		540	10.6753
	550	16.1941		550	16.3214		550	16.4443		550	10.5238		550	10.6229		550	10.6778
	560	16.2242		560	16.3689		560	16.4568		560	10.4893		560	10.6174		560	10.7072
	570	16.2628		570	16.3976		570	16.492		570	10.5574		570	10.6205		570	10.7125
	580	16.2036		580	16.365		580	16.4525		580	10.5196		580	10.628		580	10.6756
	590	16.2034		590	16.3381		590	16.5356		590	10.5071		590	10.5827		590	10.6974
	600	16.1862		600	16.374		600	16.4092		600	10.5314		600	10.6271		600	10.6514
	610	16.1993		610	16.3755		610	16.4471		610	10.4803		610	10.6494		610	10.6561
	620	16.2136		620	16.3883		620	16.4825		620	10.5178		620	10.6024		620	10.7228
	630	16.2417		630	16.3718		630	16.4586		630	10.5513		630	10.646		630	10.6751
	640	16.2255		640	16.3754		640	16.4293		640	10.5447		640	10.6205		640	10.6493
	650	16.2048		650	16.3665		650	16.4771		650	10.4925		650	10.5974		650	10.6993
	660	16.2498		660	16.3739		660	16.4446		660	10.532		660	10.6234		660	10.6843
	670	16.1325		670	16.3426		670	16.4576		670	10.4879		670	10.627		670	10.6739
	680	16.2105		680	16.3242		680	16.4671		680	10.5075		680	10.5797		680	10.6517
	690	16.2456		690	16.3945		690	16.4727		690	10.5488		690	10.6504		690	10.7322
	700	16.2288		700	16.3393		700	16.5478		700	10.521		700	10.6233		700	10.6984
	710	16.2159		710	16.4482		710	16.4646		710	10.5042		710	10.643		710	10.6847
	720	16.1999		720	16.3565		720	16.4349		720	10.5102		720	10.6129		720	10.6787
	730	16.2042		730	16.2957		730	16.4316		730	10.5241		730	10.5662		730	10.647
	740	16.1849		740	16.3149		740	16.4272		740	10.5188		740	10.6002		740	10.6851
	750	16.1879		750	16.3264		750	16.4489		750	10.5032		750	10.6025		750	10.6687
	760	16.1835		760	16.3096		760	16.4442		760	10.4927		760	10.5875		760	10.6635
	770	16.2219		770	16.3523		770	16.5071		770	10.5104		770	10.5902		770	10.6987
	780	16.1654		780	16.3301		780	16.4663		780	10.4754		780	10.5876		780	10.7088
	790	16.236		790	16.3702		790	16.5064		790	10.548		790	10.6243		790	10.6816
	800	16.2178		800	16.3438		800	16.4852		800	10.5213		800	10.6173		800	10.7219
	810	16.2223		810	16.3444		810	16.4587		810	10.533		810	10.6268		810	10.6964
	820	16.1863		820	16.3889		820	16.479		820	10.516		820	10.6413		820	10.7041
	830	16.193		830	16.3877		830	16.5047		830	10.5051		830	10.5962		830	10.6775
	840	16.2555		840	16.3502		840	16.4843		840	10.5284		840	10.6061		840	10.6859
	850	16.2005		850	16.4006		850	16.4893		850	10.5144		850	10.6261		850	10.712
	860	16.1911		860	16.2814		860	16.405		860	10.5056		860	10.604		860	10.6409
	870	16.2216		870	16.3467		870	16.4408		870	10.5394		870	10.5913		870	10.6624
	880	16.2191		880	16.3425		880	16.4286		880	10.5153		880	10.6174		880	10.6605
	890	16.2046		890	16.3913		890	16.4253		890	10.5336		890	10.6225		890	10.6673
	900	16.2061		900	16.4193		900	16.491		900	10.4953		900	10.6441		900	10.6898
	910	16.2227		910	16.3824		910	16.4336		910	10.5274		910	10.6356		910	10.6729
	920	16.1985		920	16.3731		920	16.4785		920	10.4983		920	10.6189		920	10.683
	930	16.2235		930	16.3527		930	16.4346		930	10.529		930	10.6174		930	10.6731
	940	16.2187		940	16.313		940	16.4726		940	10.5238		940	10.5813		940	10.706
	950	16.2025		950	16.3419		950	16.4601		950	10.5026		950	10.6107		950	10.6688
	960	16.1869		960	16.3707		960	16.4299		960	10.5181		960	10.6069		960	10.6751
	970	16.1815		970	16.342		970	16.4949		970	10.4935		970	10.6248		970	10.6834
	980	16.2049		980	16.3392		980	16.4538		980	10.5198		980	10.5908		980	10.6934
	990	16.225		990	16.3801		990	16.4225		990	10.5233		990	10.6145		990	10.6402
	1000	16.2119		1000	16.3578		1000	16.5066		1000	10.4985		1000	10.6314		1000	10.7063
	1010	16.1785		1010	16.3453		1010	16.4615		1010	10.5122		1010	10.6144		1010	10.6856
	1020	16.1977		1020	16.3764		1020	16.4223		1020	10.5092		1020	10.5984		1020	10.6757
	1030	16.2206		1030	16.3324		1030	16.4658		1030	10.5105		1030	10.6366		1030	10.6752
	1040	16.1937		1040	16.3524		1040	16.4306		1040	10.5126		1040	10.5775		1040	10.6549
	1050	16.1572		1050	16.3223		1050	16.4563		1050	10.4994		1050	10.5909		1050	10.69
	1060	16.2511		1060	16.3193		1060	16.514		1060	10.5188		1060	10.5989		1060	10.6771
	1070	16.1723		1070	16.3654		1070	16.4374		1070	10.4958		1070	10.6085		1070	10.6911
	1080	16.1259		1080	16.2698		1080	16.4663		1080	10.4776		1080	10.5675		1080	10.6941
	1090	16.1694		1090	16.3945		1090	16.493		1090	10.4771		1090	10.6399		1090	10.6813
	1100	16.2165		1100	16.3643		1100	16.3705		1100	10.5176		1100	10.6102		1100	10.6424
	1110	16.2359		1110	16.389		1110	16.495		1110	10.5381		1110	10.6252		1110	10.703
	1120	16.2357		1120	16.3846		1120	16.4882		1120	10.5498		1120	10.6263		1120	10.691
	1130	16.2442		1130	16.3127		1130	16.4655		1130	10.5382		1130	10.5874		1130	10.6952
	1140	16.1713		1140	16.3403		1140	16.4835		1140	10.4814		1140	10.6084		1140	10.6735
	1150	16.1969		1150	16.3833		1150	16.4221		1150	10.5073		1150	10.6241		1150	10.6845

## Sheet: Sheet6
pY-Caprin1, 960 mM NaCl
180K			200K			220K			180K			200K			220K
Z (angstorm)	[Cl-] (mg/ml)		Z (angstorm)	[Cl-] (mg/ml)		Z (angstorm)	[Cl-] (mg/ml)		Z (angstorm)	[Na+] (mg/ml)		Z (angstorm)	[Na+] (mg/ml)		Z (angstorm)	[Na+] (mg/ml)
-580	30.7992		-580	31.7117		-580	32.2713		-580	19.9644		-580	20.5559		-580	20.9792
-570	30.6649		-570	31.6973		-570	32.3113		-570	19.9074		-570	20.573		-570	20.934
-560	30.7594		-560	31.6783		-560	32.3267		-560	19.9496		-560	20.5887		-560	20.9993
-550	30.696		-550	31.6736		-550	32.1842		-550	19.9202		-550	20.5387		-550	20.8781
-540	30.7518		-540	31.7097		-540	32.2798		-540	19.9523		-540	20.5715		-540	20.9335
-530	30.6214		-530	31.6961		-530	32.2748		-530	19.8572		-530	20.5786		-530	20.9482
-520	30.6675		-520	31.6772		-520	32.3205		-520	19.8972		-520	20.5557		-520	20.9522
-510	30.7194		-510	31.6645		-510	32.2782		-510	19.9474		-510	20.5533		-510	20.9837
-500	30.736		-500	31.6553		-500	32.289		-500	19.9425		-500	20.5173		-500	20.923
-490	30.757		-490	31.6941		-490	32.297		-490	19.9622		-490	20.5988		-490	20.9566
-480	30.7694		-480	31.7455		-480	32.305		-480	19.941		-480	20.5855		-480	20.9748
-470	30.7072		-470	31.7024		-470	32.3148		-470	19.9365		-470	20.5708		-470	20.9773
-460	30.6983		-460	31.843		-460	32.2934		-460	19.9378		-460	20.6414		-460	20.941
-450	30.7127		-450	31.7462		-450	32.1937		-450	19.8865		-450	20.6201		-450	20.8783
-440	30.741		-440	31.7238		-440	32.3308		-440	19.9669		-440	20.5792		-440	20.9976
-430	30.7366		-430	31.6477		-430	32.2578		-430	19.9432		-430	20.561		-430	20.9115
-420	30.7451		-420	31.7532		-420	32.2595		-420	19.9311		-420	20.5769		-420	20.9571
-410	30.7906		-410	31.6648		-410	32.3112		-410	19.965		-410	20.5567		-410	20.9552
-400	30.7849		-400	31.7839		-400	32.3667		-400	19.9906		-400	20.5961		-400	21.0017
-390	30.82		-390	31.7453		-390	32.2719		-390	20.0318		-390	20.6218		-390	20.9251
-380	30.8328		-380	31.7541		-380	32.2502		-380	19.9709		-380	20.6174		-380	20.9267
-370	30.8106		-370	31.6987		-370	32.3427		-370	20.0176		-370	20.5807		-370	20.9939
-360	30.7807		-360	31.7677		-360	32.2397		-360	19.9883		-360	20.5682		-360	20.9061
-350	30.7642		-350	31.7133		-350	32.2919		-350	19.9755		-350	20.5877		-350	20.9562
-340	30.7176		-340	31.7281		-340	32.3389		-340	19.9361		-340	20.5975		-340	20.9529
-330	30.8269		-330	31.6851		-330	32.2782		-330	19.9771		-330	20.5377		-330	20.9735
-320	30.7856		-320	31.7342		-320	32.319		-320	19.9921		-320	20.5947		-320	20.9734
-310	30.7905		-310	31.7368		-310	32.2883		-310	19.9882		-310	20.6142		-310	20.9495
-300	30.8145		-300	31.6478		-300	32.31		-300	19.9785		-300	20.5331		-300	20.9746
-290	30.8224		-290	31.7396		-290	32.3132		-290	19.9971		-290	20.594		-290	20.9647
-280	30.7911		-280	31.7449		-280	32.2782		-280	19.96		-280	20.5965		-280	20.9249
-270	30.7791		-270	31.6604		-270	32.3		-270	19.9762		-270	20.5497		-270	20.9719
-260	30.7493		-260	31.7197		-260	32.3094		-260	19.9532		-260	20.5701		-260	20.9369
-250	30.8369		-250	31.652		-250	32.3125		-250	20.0007		-250	20.5346		-250	20.998
-240	30.7791		-240	31.6662		-240	32.4889		-240	19.9877		-240	20.5443		-240	21.0238
-230	30.7807		-230	31.7149		-230	32.4827		-230	20.0133		-230	20.5884		-230	21.0393
-220	30.9056		-220	31.8085		-220	32.5807		-220	20.0126		-220	20.6392		-220	21.0155
-210	30.9677		-210	31.7659		-210	32.796		-210	20.0788		-210	20.5989		-210	21.1022
-200	31.1446		-200	31.7235		-200	33.2102		-200	20.1546		-200	20.565		-200	21.2003
-190	31.5111		-190	31.7978		-190	33.5984		-190	20.2247		-190	20.6137		-190	21.4029
-180	32.5393		-180	32.0059		-180	34.1528		-180	20.5098		-180	20.6858		-180	21.7553
-170	34.0077		-170	32.2413		-170	34.7185		-170	21.0976		-170	20.7416		-170	22.1725
-160	36.1723		-160	32.6693		-160	35.2945		-160	22.1711		-160	20.8856		-160	22.7386
-150	38.5426		-150	33.4746		-150	36.0278		-150	23.8175		-150	21.1243		-150	23.3544
-140	40.4654		-140	34.6641		-140	36.9502		-140	25.864		-140	21.6714		-140	23.9403
-130	42.2273		-130	36.0245		-130	37.8637		-130	27.9079		-130	22.4303		-130	24.7514
-120	44.64		-120	37.3236		-120	38.6668		-120	29.8454		-120	23.598		-120	25.5117
-110	47.4852		-110	38.7021		-110	39.4962		-110	31.4879		-110	24.8355		-110	26.2835
-100	50.2064		-100	40.214		-100	39.8712		-100	33.1695		-100	26.2374		-100	27.0608
-90	51.8996		-90	41.8904		-90	40.1629		-90	34.918		-90	27.6597		-90	27.6981
-80	52.7722		-80	43.4853		-80	40.4595		-80	36.6186		-80	29.0074		-80	28.1727
-70	53.2148		-70	44.6099		-70	40.727		-70	37.9444		-70	30.19		-70	28.2728
-60	53.4268		-60	45.4609		-60	41.0045		-60	38.4477		-60	31.3259		-60	28.3034
-50	53.8473		-50	45.8352		-50	41.0645		-50	38.4994		-50	32.1146		-50	28.1571
-40	53.7261		-40	46.011		-40	41.2865		-40	37.7044		-40	32.5945		-40	28.0836
-30	53.183		-30	46.1484		-30	41.2468		-30	36.5237		-30	32.7727		-30	27.9337
-20	51.6752		-20	46.1641		-20	41.0567		-20	34.979		-20	32.7301		-20	27.8066
-10	49.3632		-10	46.1911		-10	40.6457		-10	33.4915		-10	32.4573		-10	27.5779
0	46.9583		0	45.9749		0	40.1982		0	31.6722		0	31.9139		0	27.3839
10	44.7931		10	45.4311		10	39.6588		10	29.603		10	31.2306		10	27.1153
20	42.8603		20	44.4193		20	39.0927		20	27.2858		20	30.2676		20	26.5938
30	40.4799		30	43.1004		30	38.5306		30	25.1059		30	29.2455		30	26.0558
40	37.8648		40	41.746		40	37.9061		40	23.4762		40	27.8738		40	25.2586
50	35.451		50	40.3327		50	37.2046		50	22.2861		50	26.3627		50	24.3558
60	33.7724		60	38.95		60	36.5592		60	21.4288		60	24.7877		60	23.4293
70	32.6729		70	37.4383		70	35.7985		70	20.824		70	23.2477		70	22.6708
80	31.9018		80	35.94		80	34.9406		80	20.4292		80	22.13		80	22.0405
90	31.4342		90	34.3634		90	34.2255		90	20.1686		90	21.3604		90	21.6405
100	31.068		100	33.1249		100	33.5015		100	20.0519		100	20.9489		100	21.44
110	30.8203		110	32.4409		110	32.9667		110	19.9856		110	20.7614		110	21.1964
120	30.802		120	31.9741		120	32.79		120	19.9718		120	20.6867		120	21.1365
130	30.753		130	31.8559		130	32.6004		130	19.9591		130	20.6139		130	21.0727
140	30.7927		140	31.8155		140	32.4759		140	19.9612		140	20.6676		140	20.9953
150	30.7557		150	31.736		150	32.4071		150	19.9754		150	20.5754		150	21.0272
160	30.7632		160	31.7681		160	32.3754		160	19.9521		160	20.6135		160	20.9532
170	30.727		170	31.7757		170	32.2497		170	19.9221		170	20.597		170	20.9206
180	30.6579		180	31.6839		180	32.3383		180	19.9078		180	20.552		180	21.0091
190	30.6312		190	31.6476		190	32.3589		190	19.8833		190	20.5508		190	20.9748
200	30.6582		200	31.7594		200	32.3369		200	19.9032		200	20.581		200	21.0005
210	30.6881		210	31.6521		210	32.3687		210	19.8938		210	20.5501		210	20.973
220	30.7661		220	31.7371		220	32.2183		220	19.9514		220	20.6084		220	20.9415
230	30.7423		230	31.6677		230	32.3013		230	19.9495		230	20.5609		230	20.957
240	30.6997		240	31.6879		240	32.3131		240	19.9269		240	20.5632		240	20.9565
250	30.6678		250	31.6861		250	32.2543		250	19.8951		250	20.5566		250	20.9304
260	30.8048		260	31.7559		260	32.1662		260	19.9686		260	20.6096		260	20.8684
270	30.7134		270	31.6843		270	32.3848		270	19.9405		270	20.5308		270	20.9797
280	30.6695		280	31.7082		280	32.3296		280	19.8902		280	20.574		280	21.0125
290	30.6294		290	31.7133		290	32.2892		290	19.8643		290	20.5714		290	20.948
300	30.6863		300	31.776		300	32.3367		300	19.9322		300	20.6427		300	20.961
310	30.6663		310	31.7049		310	32.3007		310	19.8798		310	20.5562		310	20.9622
320	30.7031		320	31.7034		320	32.3741		320	19.9129		320	20.6027		320	21.0193
330	30.7246		330	31.7349		330	32.3178		330	19.9611		330	20.569		330	20.9902
340	30.6578		340	31.7347		340	32.393		340	19.8843		340	20.5838		340	20.9888
350	30.6745		350	31.622		350	32.2614		350	19.8721		350	20.5384		350	20.9657
360	30.6584		360	31.6751		360	32.2521		360	19.9229		360	20.5528		360	20.9168
370	30.7173		370	31.6575		370	32.3358		370	19.9268		370	20.5328		370	21.0005
380	30.7427		380	31.7254		380	32.3636		380	19.9436		380	20.5445		380	20.9917
390	30.6437		390	31.6836		390	32.3905		390	19.8745		390	20.5712		390	20.9906
400	30.6661		400	31.66		400	32.2774		400	19.9064		400	20.5684		400	20.9534
410	30.6553		410	31.7411		410	32.2873		410	19.9143		410	20.5667		410	20.9299
420	30.7622		420	31.7024		420	32.2873		420	19.9261		420	20.5765		420	20.9725
430	30.7043		430	31.6216		430	32.3467		430	19.9125		430	20.5483		430	20.9907
440	30.67		440	31.7532		440	32.334		440	19.8897		440	20.5681		440	20.9853
450	30.7566		450	31.776		450	32.2567		450	19.9677		450	20.6177		450	20.9342
460	30.7069		460	31.6462		460	32.3314		460	19.9162		460	20.5618		460	20.951
470	30.703		470	31.6489		470	32.3079		470	19.9505		470	20.5261		470	20.9667
480	30.6618		480	31.6968		480	32.3052		480	19.8733		480	20.556		480	20.9778
490	30.7389		490	31.7482		490	32.3573		490	19.9366		490	20.6057		490	20.9695
500	30.675		500	31.7065		500	32.3289		500	19.9188		500	20.5508		500	20.9789
510	30.7441		510	31.6785		510	32.3957		510	19.928		510	20.5775		510	21.0148
520	30.7073		520	31.633		520	32.2432		520	19.9086		520	20.5471		520	20.9519
530	30.591		530	31.6972		530	32.2876		530	19.8763		530	20.5335		530	20.9443
540	30.783		540	31.7184		540	32.3572		540	19.965		540	20.5757		540	21.0075
550	30.7585		550	31.6752		550	32.3565		550	19.9646		550	20.5307		550	20.9399
560	30.7342		560	31.674		560	32.2486		560	19.9461		560	20.5989		560	20.9661
570	30.6872		570	31.6885		570	32.3041		570	19.9091		570	20.5403		570	20.938
