# Supplementary material for: Electrostatics of salt-dependent reentrant phase behaviors highlights diverse roles of ATP in biomolecular condensates
Source: eLife journal article supplement (doi:10.7554/elife.100284), 2024-09-05
Supplement: app1-fig4-data1 [file elife-100284-app1-fig4-data1-v1.zip]

## Sheet: Sheet1
	(a)								(b)								(e)										(f)										(g)
	Fig. S4a, Caprin1 self-correlation at [NaCl]= 0.0001, 0.01 and 2.0 b^{-3}								Fig. S4b, pY-Caprin1 self-correlation at [NaCl]= 0.0001, 0.01 and 2.0 b^{-3}									Average [protein] /mM at [NaCl]=0,1e-6,…1e0 b^-3										Average [protein] /mM at [NaCl]=0,1e-6,…1e0 b^-3									[NaCl] / mM	rhoH_av / mM	rhoL_av / mM
	r/b	0.0001(Avg)	0.0001(Std)	0.01(Avg)	0.01(Std)	2.0(Avg)	2.0(Std)		r/b	0.0001(Avg)	0.0001(Std)	0.01(Avg)	0.01(Std)	2.0(Avg)	2.0(Std)		z / Å	0	1e-6	1e-5	1e-4	1e-3	1e-2	1e-1	1e0		z / Å	0	1e-6	1e-5	1e-4	1e-3	1e-2	1e-1	1e0		0	291.314	23.4547
	0	0.113921	0.0161819	0.121207	0.00590665	0.111452	0.000413783		0	0.451762	0.010314	0.402541	0.0103054	0.113249	0.000485791		0	23.5375	18.7425	15.6054	11.8717	13.7708	23.8225	50.0967	101.512		0	0.00223021	-3.61786e-06	-7.15706e-05	-4.01837e-05	0.00113901	-6.51228e-05	0.0122367	85.9572		0.0302628	295.387	21.2161
	0.408248	0.103196	0.0158603	0.109791	0.0056794	0.0999511	0.000413593		0.408248	0.425085	0.00966233	0.378813	0.00966988	0.101653	0.000476911		1.55134	22.8107	19.6616	17.126	13.5532	15.5374	23.965	50.4339	101.588		1.55134	0.00282583	-1.15018e-05	-6.35643e-05	-2.72139e-05	0.000837589	-5.46201e-05	0.0118083	86.2394		0.302628	292.602	15.0484
	0.57735	0.0942934	0.0155114	0.100254	0.00545453	0.0903722	0.000413282		0.57735	0.401105	0.00907171	0.357644	0.00910716	0.0919859	0.000468174		3.10269	22.5335	21.4414	18.1957	15.2824	17.413	24.4711	51.1084	101.785		3.10269	0.00244641	-1.01163e-05	-4.82128e-05	-1.7408e-05	0.000513841	-4.50708e-05	0.0121754	86.6365		3.02628	312.227	14.5713
	0.707107	0.0868498	0.0151451	0.0922297	0.0052327	0.08234	0.000412664		0.707107	0.379401	0.00852248	0.338602	0.00860304	0.0838727	0.000459695		4.65403	22.7697	22.7914	18.7501	16.5652	19.8428	25.3465	52.0241	102.098		4.65403	0.00153037	-8.08077e-06	-3.19027e-05	-1.36173e-05	0.000252407	-2.41133e-05	0.0135732	87.1958		30.2628	291.927	14.8117
	0.816497	0.08073	0.0146833	0.0854713	0.00522395	0.0755549	0.000407797		0.816497	0.359664	0.00797219	0.321317	0.00810041	0.0770146	0.000451362		6.20537	23.8779	24.0636	19.386	17.5607	22.4784	26.0499	53.1263	102.527		6.20537	0.000878834	-2.49702e-06	-1.41507e-05	-1.2424e-05	9.60367e-05	-2.14993e-06	0.0160605	87.8554		302.628	287.56	25.3372
	0.912871	0.0754126	0.0142959	0.0796496	0.00499075	0.0697881	0.00040685		0.912871	0.341541	0.00751446	0.305578	0.0076803	0.0711778	0.000443685		7.75672	24.8377	25.4586	21.4071	19.6192	25.1473	27.4749	54.7052	103.085		7.75672	0.000375299	3.57693e-06	-2.9682e-06	-9.24169e-06	3.68992e-05	1.85515e-05	0.0198026	88.6251		3026.28	200.044	51.5645
	1	0.0708546	0.0139107	0.0746386	0.0047662	0.0648479	0.000405326		1	0.32485	0.00706713	0.291127	0.00729641	0.0661727	0.000436283		9.30806	25.916	27.0884	23.9116	22.3862	27.8438	29.6714	56.9065	103.751		9.30806	0.000198392	6.60527e-06	8.06512e-06	-5.07366e-06	2.05648e-05	4.10168e-05	0.0236115	89.4864
	1.1547	0.0636645	0.0130651	0.0665017	0.00447194	0.0568819	0.000399014		1.1547	0.295067	0.00628835	0.2654	0.00657264	0.05809	0.000422588		10.8594	27.2119	28.6505	26.3679	25.4829	30.6413	31.9249	59.6202	104.503		10.8594	0.000125652	1.19652e-05	2.40783e-05	-8.90837e-07	1.5967e-05	6.33684e-05	0.0276198	90.4878		(h)
	1.22474	0.0607071	0.0126529	0.0631735	0.00434014	0.0536382	0.000394779		1.22474	0.281694	0.00586348	0.253891	0.0062374	0.0547957	0.000415654		12.4107	28.4305	30.1892	29.1746	28.084	33.4937	34.1469	62.6415	105.326		12.4107	9.72166e-05	2.11319e-05	3.7225e-05	5.64508e-06	2.41453e-05	9.92842e-05	0.0317282	91.587		[NaCl] / mM	rhoH_av / mM	rhoL_av / mM
	1.29099	0.0583237	0.0121117	0.0602659	0.00441646	0.0507785	0.00038737		1.29099	0.269231	0.0054709	0.243153	0.00582214	0.0518924	0.000408949		13.9621	30.5642	31.7061	32.3205	30.5783	36.395	36.6675	65.9049	106.212		13.9621	9.34715e-05	3.36479e-05	4.70044e-05	1.66168e-05	4.14139e-05	0.00016773	0.0349155	92.7888		0	1101.29	1.02699
	1.35401	0.0559502	0.0117574	0.0575948	0.0041871	0.0482467	0.000384711		1.35401	0.257457	0.00515442	0.23304	0.00555298	0.049313	0.00040304		15.5134	34.3067	33.6303	35.5388	33.6035	39.9797	39.8747	69.2368	107.151		15.5134	0.000119706	5.18978e-05	6.73282e-05	4.06259e-05	8.37539e-05	0.000284364	0.0406251	94.0846		0.0302628	1049.75	1.26904
	1.41421	0.0535808	0.0115672	0.0551366	0.00378669	0.0459888	0.000384996		1.41421	0.246319	0.00485599	0.22349	0.00543667	0.0470056	0.000397073		17.0648	38.4305	36.4742	38.9453	36.3971	44.3655	43.1253	72.8081	108.148		17.0648	0.000189934	9.76952e-05	0.000131459	9.31814e-05	0.000170014	0.000498698	0.0505895	95.4362		0.302628	1028.73	1.46942
	1.47196	0.0520491	0.011015	0.053014	0.00382999	0.043962	0.000378443		1.47196	0.235944	0.00462924	0.214533	0.00505977	0.0449402	0.000391875		18.6161	42.7283	39.7164	42.4228	38.7982	48.7387	46.2032	76.6794	109.199		18.6161	0.000340311	0.000212805	0.00030296	0.000213302	0.000345137	0.000902779	0.0697121	96.9344		3.02628	1086.64	1.20859
	1.52753	0.0502563	0.0107042	0.0510419	0.0036465	0.0421295	0.000374593		1.52753	0.226073	0.00432344	0.206064	0.00484139	0.0430691	0.000385993		20.1675	47.0509	43.3901	46.992	41.8964	52.9428	49.662	80.7122	110.294		20.1675	0.000663115	0.0004917	0.000701279	0.000486201	0.00070767	0.00163414	0.0985339	98.5476		30.2628	1066.39	1.17362
	1.63299	0.0477737	0.00974539	0.0477613	0.00389761	0.0389394	0.000359516		1.63299	0.208007	0.00369039	0.190616	0.00406488	0.0398287	0.000377025		21.7188	51.584	47.9213	51.637	45.2286	57.3103	53.4374	84.969	111.439		21.7188	0.00133587	0.00111473	0.00154229	0.00108402	0.00142081	0.00298872	0.137132	100.289		302.628	1059	1.38869
	1.68325	0.0461124	0.0095924	0.0461116	0.00340307	0.0375609	0.000359165		1.68325	0.199538	0.00352938	0.183271	0.00406121	0.0384054	0.000370299		23.2702	56.0795	52.8824	56.5618	49.2848	62.235	57.3175	89.4168	112.605		23.2702	0.00267199	0.0024461	0.00321837	0.00234868	0.0028392	0.00550804	0.189403	102.234		3026.28	963.074	3.58398
	1.73205	0.045061	0.00920308	0.0447047	0.00332089	0.0362895	0.000355425		1.73205	0.191568	0.0033526	0.176376	0.00380844	0.0371033	0.00036629		24.8215	61.5929	58.4623	62.5288	53.5276	67.2277	61.699	94.154	113.782		24.8215	0.00541257	0.00530785	0.00655281	0.00493797	0.00555382	0.0101849	0.267107	104.31
	1.77951	0.0436733	0.00906259	0.0433038	0.00301591	0.0351206	0.000354926		1.77951	0.183905	0.00320614	0.169737	0.00383165	0.0358933	0.000359114		26.3728	67.7508	64.5578	69.4177	58.0368	72.7431	67.1019	98.99	114.966		26.3728	0.0109054	0.0111892	0.0131493	0.0101397	0.0105504	0.0188829	0.383452	106.592
	1.82574	0.0428996	0.00858209	0.0421278	0.00307186	0.0340264	0.000347906		1.82574	0.176743	0.00298928	0.163562	0.00342191	0.0347833	0.000357259		27.9242	74.4416	71.1706	76.3618	63.6688	78.5853	73.4634	103.985	116.158		27.9242	0.0217017	0.0228416	0.0258826	0.0204865	0.0184801	0.0348328	0.552787	109.024
	1.87083	0.0418001	0.00835855	0.0409613	0.00293332	0.0330142	0.000343933		1.87083	0.169846	0.00280849	0.157607	0.00329267	0.0337437	0.000351896		29.4755	82.5581	77.6187	83.7048	70.2747	84.7312	80.0772	109.352	117.331		29.4755	0.0421269	0.0449481	0.050131	0.040433	0.0299932	0.0637974	0.788117	111.603
	1.91485	0.0404108	0.00831919	0.0397774	0.0027049	0.0320717	0.000341773		1.91485	0.163223	0.00263519	0.151889	0.00337997	0.0327665	0.000341986		31.0269	91.0759	84.8045	91.9211	78.2088	91.6468	87.0393	114.812	118.501		31.0269	0.0780579	0.0865129	0.0956596	0.0782122	0.0442381	0.115269	1.11816	114.28
	2	0.0389126	0.0076864	0.0378349	0.0026049	0.0303674	0.000332806		2	0.150992	0.00234577	0.14128	0.00293405	0.0310216	0.000335798		32.5782	99.6108	93.4404	100.536	87.7171	99.4892	94.7202	120.189	119.654		32.5782	0.143636	0.163005	0.179265	0.148096	0.0552435	0.206226	1.58025	117.09
	2.04124	0.0384401	0.00729899	0.0370096	0.00252492	0.0296007	0.000331475		2.04124	0.145203	0.0022135	0.136237	0.00268896	0.0302356	0.000333646		34.1296	108.6	103.938	109.74	98.0813	108.767	103.811	125.315	120.782		34.1296	0.267159	0.299302	0.328958	0.2728	0.038479	0.365875	2.24286	120.088
	2.08167	0.0376193	0.00710268	0.0361444	0.00245915	0.0288692	0.000325892		2.08167	0.139755	0.0020734	0.131509	0.00252077	0.0294873	0.000329536		35.6809	117.793	114.465	120.06	109.104	118.001	114.074	130.517	121.905		35.6809	0.474498	0.537117	0.585896	0.492093	0.00394395	0.634928	3.19905	123.155
	2.12132	0.0369023	0.00687856	0.0353242	0.00247871	0.0281765	0.000318859		2.12132	0.134549	0.00193659	0.127014	0.00229537	0.0287853	0.000327029		37.2322	127.009	125.495	131.018	120.897	126.827	125.234	135.882	122.945		37.2322	0.879511	0.943512	1.01482	0.870285	0.420595	1.07323	4.6125	126.358
	2.19848	0.0352529	0.00655334	0.0336729	0.00222767	0.0269235	0.000314844		2.19848	0.124739	0.00174462	0.118363	0.0022325	0.0274813	0.000313416		38.7836	137.205	136.859	141.565	134.117	135.941	136.738	141.344	123.946		38.7836	1.51916	1.62195	1.7229	1.5066	0.982076	1.78946	6.70702	129.683
	2.23607	0.0349437	0.00625644	0.0330456	0.00218983	0.0263441	0.000310683		2.23607	0.120133	0.00166276	0.114333	0.00193808	0.0268978	0.000315867		40.3349	148.863	149.228	151.757	148.622	145.49	148.924	146.714	124.93		40.3349	2.50835	2.77226	2.90173	2.54106	2.33742	2.95433	9.90866	133.015
	2.3094	0.0335162	0.00588253	0.0317587	0.00209803	0.0252853	0.000314112		2.3094	0.111404	0.00153007	0.106554	0.00201714	0.0257844	0.000299268		41.8863	161.29	162.563	162.274	164.003	156.216	161.93	152.068	125.837		41.8863	4.12434	4.74377	4.93434	4.3135	4.087	4.88663	14.8702	136.271
	2.34521	0.0328612	0.00578662	0.031054	0.00200203	0.0247797	0.000304946		2.34521	0.107455	0.00140678	0.103121	0.00182304	0.0252716	0.000296737		43.4376	174.791	175.878	174.559	179.406	168.555	174.931	157.363	126.697		43.4376	6.79103	8.16402	8.51599	7.36536	7.00196	8.19715	22.6136	139.38
	2.38048	0.0320867	0.00567304	0.0303055	0.00195437	0.0243035	0.000300037		2.38048	0.103604	0.00131957	0.0997036	0.00174937	0.0247788	0.000289744		44.989	188.095	189.9	188.651	194.161	182.164	187.69	162.592	127.542		44.989	12.221	14.2981	15.1698	13.005	12.3198	14.3055	34.8603	142.322
	2.41523	0.0318128	0.00544844	0.0298678	0.00187665	0.0238564	0.000299114		2.41523	0.0998477	0.00128767	0.0963588	0.00158979	0.0243236	0.000290262		46.5403	201.272	204.48	202.58	208.808	196.615	201.15	167.736	128.335		46.5403	22.9476	26.2772	27.5385	23.8579	22.2762	26.2669	54.6152	145.018
	2.44949	0.0310354	0.00539627	0.0293007	0.00188715	0.023418	0.000293602		2.44949	0.0963174	0.00112628	0.0932878	0.00154868	0.0238698	0.000281317		48.0916	214.17	219.334	215.916	225.109	211.398	214.688	172.667	129.09		48.0916	44.8466	51.1988	51.9408	45.0673	42.5452	50.7425	86.6231	147.472
	2.48328	0.0312592	0.00529458	0.0291137	0.00197145	0.0230029	0.000290118		2.48328	0.092723	0.00129211	0.0902813	0.0012209	0.0234823	0.000295676		49.643	226.815	233.398	228.079	240.912	225.341	226.971	177.436	129.822		49.643	86.0979	99.0746	99.9231	87.3326	83.1231	96.4106	137.173	149.677
	2.51661	0.0302295	0.00506903	0.0282827	0.00174312	0.0226129	0.000287239		2.51661	0.0895702	0.00103623	0.0873077	0.00130818	0.0230507	0.000278423		51.1943	239.696	246.154	239.976	255.569	238.32	238.916	182.08	130.504		51.1943	159.497	180.001	183.31	164.626	159.159	175.969	213.899	151.675
	2.58199	0.0295775	0.00483262	0.027403	0.00155372	0.0218769	0.000281815		2.58199	0.0832861	0.00107182	0.081669	0.00106262	0.0223099	0.000278948		52.7457	252.006	257.838	251.701	268.573	250.726	250.419	186.327	131.14		52.7457	276.813	304.375	310.417	290.596	284.893	300.264	322.804	153.412
	2.61406	0.0287211	0.00466358	0.0268016	0.0015947	0.0215292	0.000279946		2.61406	0.080467	0.000888334	0.0790601	0.00112603	0.0219308	0.000264976		54.297	264.674	268.822	262.233	280.08	261.842	260.326	190.091	131.685		54.297	441.115	465.573	478.405	471.788	460.476	466.753	464.361	154.908
	2.64575	0.0281963	0.00451401	0.02652	0.00171487	0.0212	0.000283407		2.64575	0.0776774	0.000984696	0.0764353	0.00123048	0.0215775	0.00025723		55.8484	275.866	278.423	271.504	290.788	271.929	268.918	193.402	132.125		55.8484	632.55	647.526	662.639	681.523	660.518	654.156	622.147	156.077
	2.67706	0.0273691	0.00459072	0.0256814	0.00179536	0.0208675	0.00027222		2.67706	0.0750854	0.00074643	0.0742545	0.00109432	0.0212325	0.000250058		57.3997	284.84	286.52	279.756	299.947	280.489	276.694	196.163	132.508		57.3997	828.962	822.813	835.422	878.656	848.497	836.223	775.208	156.939
	2.70801	0.0275608	0.0043382	0.0255179	0.00142642	0.0205683	0.00027148		2.70801	0.0723881	0.000878792	0.0718077	0.00093141	0.0209488	0.000256739		58.9511	290.969	292.635	286.799	306.607	287.11	283.306	198.408	132.814		58.9511	993.516	960.516	967.535	1024.76	990.831	977.484	895.353	157.389
	2.73861	0.0267979	0.00426065	0.0251058	0.00156752	0.0202693	0.000270592		2.73861	0.0699631	0.000772887	0.0694902	0.00096017	0.020622	0.000245464		60.5024	292.743	295.734	291.479	310.909	291.225	287.345	199.766	132.993		60.5024	1092.23	1039.5	1034.65	1098.28	1065.99	1058.29	962.196	157.529
	2.76887	0.0266821	0.00417135	0.0247563	0.00135454	0.0199879	0.000267909		2.76887	0.0675119	0.000837887	0.0672531	0.000894725	0.0203458	0.000247423		62.0537	291.314	295.387	292.602	312.227	291.927	287.56	200.044	133.029		62.0537	1101.29	1049.75	1028.73	1086.64	1066.39	1059	963.074	157.418
	2.82843	0.0248503	0.00435135	0.0233248	0.00188666	0.019427	0.000256331		2.82843	0.0632224	0.000684221	0.0634304	0.000858962	0.0197381	0.000228638		63.6051	287.257	291.266	289.95	309.588	289.602	284.048	199.704	132.933		63.6051	1023.34	990.132	956.904	991.101	989.407	982.535	899.375	157.028
	2.85774	0.0254127	0.00388659	0.0236436	0.00131498	0.0191849	0.000260487		2.85774	0.0608952	0.000757797	0.0612943	0.000768368	0.0195175	0.000232797		65.1564	280.937	282.852	284.738	302.433	283.892	278.062	198.92	132.739		65.1564	875.076	862.559	830.172	834.685	848.863	842.573	783.786	156.233
	2.88675	0.024771	0.00382878	0.0232496	0.00145652	0.0189304	0.000257464		2.88675	0.058886	0.000559564	0.0594472	0.000749683	0.0192503	0.000225606		66.7078	271.56	273.087	277.073	292.096	275.348	269.435	197.426	132.445		66.7078	681.07	683.165	666.042	638.44	669.013	663.848	636.865	155.093
	2.91548	0.0248006	0.00371677	0.0232787	0.00116081	0.0186984	0.000259971		2.91548	0.0568373	0.000833611	0.0574842	0.000859779	0.0190247	0.000226461		68.2591	259.905	263.527	268.167	280.158	265.754	259.663	195.18	132.04		68.2591	473.875	487.414	488.867	443.46	480.228	473.145	483.441	153.606
	2.94392	0.0242787	0.00366299	0.0228671	0.00139675	0.018469	0.000255648		2.94392	0.0550001	0.00083292	0.0555887	0.000965876	0.0187717	0.000220432		69.8105	247.664	252.934	257.943	267.206	254.935	249.056	192.139	131.539		69.8105	294.577	313.672	325.087	279.359	308.899	307.918	345.329	151.796
	2.97209	0.0240038	0.0036085	0.022497	0.00115063	0.0182436	0.000252565		2.97209	0.0531548	0.000765928	0.0539811	0.000801867	0.0185496	0.000217942		71.3618	235.378	241.011	246.942	253.292	243.682	237.303	188.449	130.943		71.3618	163.945	182.714	194.341	159.452	180.681	182.087	234.279	149.694
	3	0.0235484	0.00349583	0.0220471	0.00119675	0.0180232	0.000249119		3	0.0514107	0.000709922	0.0524661	0.000683349	0.0183223	0.000213414		72.9131	223.745	228.531	235.48	238.435	232.1	223.957	184.152	130.26		72.9131	85.3466	97.8082	107.307	82.3022	99.8209	98.8956	152.123	147.315
	3.05505	0.0226449	0.00335368	0.0214703	0.00139265	0.0176042	0.00024436		3.05505	0.048161	0.000612692	0.0493607	0.000706006	0.0178723	0.000202468		74.4645	211.414	216.017	223.1	223.674	219.027	210.12	179.156	129.576		74.4645	43.6243	49.5332	56.3164	40.7956	53.2208	52.1099	95.6043	144.809
	3.08221	0.022209	0.00334905	0.0208355	0.00133638	0.0174043	0.000239045		3.08221	0.0465857	0.000587043	0.0479971	0.000545109	0.0176748	0.000201337		76.0158	198.162	203.534	210.168	208.244	205.852	196.836	173.607	128.823		76.0158	22.7602	25.4863	28.8788	21.2837	28.2201	27.9154	58.7252	142.207
	3.10913	0.0224505	0.00344641	0.0209158	0.000973765	0.017226	0.000239781		3.10913	0.0450191	0.000844947	0.0462759	0.000731353	0.0175105	0.000201093		77.5672	184.883	191.433	197.094	192.23	192.553	183.8	167.917	127.976		77.5672	12.3808	13.788	14.7592	11.5863	15.4275	15.4998	36.5692	139.486
	3.13581	0.0218003	0.00322325	0.0205204	0.00116929	0.0170313	0.000236083		3.13581	0.0436088	0.00063754	0.0450522	0.000603708	0.0172945	0.000194203		79.1185	172.082	179.647	184.043	176.843	178.849	171.185	161.895	127.095		79.1185	7.03627	7.81752	7.41738	6.5887	8.72351	8.93412	23.4036	136.722
	3.18852	0.0209658	0.00306244	0.0201667	0.00140527	0.0166653	0.000232084		3.18852	0.0408775	0.000545547	0.0424973	0.000680603	0.0169033	0.000185806		80.6699	159.401	168.234	170.864	162.689	165.339	158.495	155.4	126.135		80.6699	4.16266	4.49148	3.83292	3.85021	4.84872	5.30029	15.2714	134.007
	3.21455	0.0209978	0.00299011	0.0200756	0.00114151	0.0165051	0.000231044		3.21455	0.0395427	0.000696203	0.0411246	0.000758049	0.0167472	0.000182032		82.2212	147.82	155.957	158.137	149.537	152.164	145.845	148.828	125.116		82.2212	2.48806	2.50663	2.39833	2.27426	2.54344	2.1503	10.2365	131.26
	3.26599	0.0212176	0.00342278	0.0196493	0.00165399	0.0161868	0.000258112		3.26599	0.0370239	0.00146672	0.0387276	0.00119337	0.0164809	0.000179347		83.7725	136.459	142.984	145.382	136.676	139.596	134.09	142.302	124.077		83.7725	1.47056	1.07295	1.50664	1.33197	1.07865	1.15166	7.04129	128.529
	3.2914	0.0201872	0.00284654	0.0193689	0.001032	0.0160178	0.000227373		3.2914	0.0359392	0.000703817	0.0376322	0.000678978	0.0162545	0.000171399		85.3239	125.649	130.303	132.626	124.481	127.848	123.241	135.89	123.036		85.3239	0.850559	0.0464904	0.896476	0.767331	0.159607	0.720908	5.0484	125.854
	3.31662	0.0198413	0.00289836	0.0188975	0.00103691	0.0158637	0.000223676		3.31662	0.0347993	0.000656328	0.0365925	0.000582636	0.0160972	0.000169482		86.8752	114.956	118.51	120.617	113.615	116.238	113.651	129.616	121.984		86.8752	0.480906	-0.159309	0.53658	0.433418	-0.740807	0.420982	3.67447	123.119
	3.34166	0.0196073	0.00275979	0.0186248	0.00102259	0.0157166	0.000222562		3.34166	0.0336676	0.000756405	0.0356165	0.000569711	0.015935	0.000165929		88.4266	104.847	107.932	109.576	103.584	105.192	104.948	123.463	120.914		88.4266	0.265884	-0.215127	0.315989	0.240532	-1.28361	0.233676	2.64438	120.345
	3.3665	0.0192567	0.00282308	0.0183389	0.00112976	0.0155675	0.0002221		3.3665	0.0326606	0.000750698	0.0346058	0.000585877	0.0157962	0.000165002		89.9779	95.7789	98.2809	99.6009	94.6408	95.6613	96.7421	117.573	119.802		89.9779	0.143005	-0.104974	0.178178	0.129998	0.575964	0.146134	1.8814	117.562
	3.39116	0.0193207	0.00281052	0.0183229	0.00086359	0.0154381	0.000222384		3.39116	0.0316102	0.000848943	0.0334668	0.000633406	0.0156655	0.000158847		91.5293	88.0715	89.4667	91.2139	85.5403	87.7471	88.8834	111.84	118.688		91.5293	0.075545	-0.0309268	0.0979037	0.0671399	0.276811	0.0906054	1.35417	114.865
	3.41565	0.0182487	0.00267423	0.0179903	0.00154777	0.0152712	0.000214747		3.41565	0.0307356	0.000612037	0.0328026	0.000559741	0.0154622	0.000163064		93.0806	80.4489	81.3712	83.9473	76.5541	80.6416	81.3717	106.092	117.538		93.0806	0.039218	-0.00663132	0.0513811	0.0346943	0.0230124	0.0525966	0.962935	112.323
	3.4641	0.0185907	0.00266933	0.0179286	0.00080871	0.0150363	0.000213523		3.4641	0.0287676	0.000795243	0.030674	0.000658002	0.0152488	0.000148904		94.632	73.8678	74.0081	76.873	68.2426	74.9496	74.4934	100.702	116.361		94.632	0.0198111	0.00136986	0.0260386	0.0173145	-0.0167404	0.0297892	0.676723	109.778
	3.48807	0.0182607	0.0026427	0.0178557	0.000995994	0.0149017	0.000205908		3.48807	0.0279802	0.000748224	0.0297803	0.000683583	0.0151035	0.000145311		96.1833	67.6572	67.0419	69.1187	61.1412	70.1439	68.6118	95.7754	115.159		96.1833	0.00978925	0.00347066	0.0129549	0.0087572	-0.0135649	0.0166197	0.478366	107.282
	3.51188	0.0179975	0.00259593	0.0173991	0.000968181	0.0147756	0.000206793		3.51188	0.027117	0.000677264	0.0290301	0.000554313	0.0149718	0.000143473		97.7346	61.9744	60.7474	62.0375	55.1382	65.6226	63.9659	91.1858	113.926		97.7346	0.00476786	0.00273139	0.00635902	0.00427837	-0.00556637	0.00889108	0.338573	104.899
	3.53553	0.0175371	0.00255544	0.0175028	0.0012412	0.0146418	0.000197876		3.53553	0.0263126	0.00061198	0.0282126	0.000709668	0.0148234	0.000141991		99.286	57.3666	54.9756	55.5128	49.7979	60.8201	59.5169	86.6543	112.673		99.286	0.00230855	0.00154134	0.00304263	0.00205392	-0.000922393	0.00462516	0.238809	102.696
	3.55903	0.0171328	0.00231208	0.017389	0.00141685	0.0145184	0.00019916		3.55903	0.025552	0.000671227	0.0274919	0.000770081	0.014686	0.000143601		100.837	53.5944	49.5874	49.9994	45.352	55.7566	55.251	82.29	111.46		100.837	0.0011246	0.000716814	0.00142841	0.000992916	-0.00017535	0.00236411	0.173443	100.576
	3.58236	0.0169907	0.0024995	0.016585	0.00112897	0.0144083	0.000203255		3.58236	0.0247568	0.00065793	0.0268592	0.000458151	0.0145872	0.000142445		102.389	50.3285	44.8031	45.4299	40.9757	50.8856	50.9674	78.251	110.279		102.389	0.000555304	0.000345126	0.000655208	0.000480296	-0.000363275	0.00120817	0.126557	98.5228
	3.60555	0.016909	0.00233218	0.0169407	0.00123679	0.0142941	0.000195626		3.60555	0.0240231	0.000597775	0.0259549	0.000702113	0.0144606	0.000135789		103.94	46.9673	40.8391	40.6975	37.0261	46.3334	47.1884	74.4227	109.184		103.94	0.00031201	0.000139504	0.000287723	0.000231906	2.93987e-05	0.000592393	0.0926301	96.6187
	3.65148	0.0169443	0.00260176	0.0163897	0.000997463	0.0140926	0.000193409		3.65148	0.0227336	0.000846876	0.0244126	0.000478624	0.0142752	0.000120497		105.491	43.9931	36.6671	36.1385	33.7486	42.1863	44.102	70.866	108.161		105.491	0.000195415	6.61138e-05	0.000119381	0.000115691	0.000334386	0.000289511	0.0674951	94.8398
	3.67423	0.0164124	0.00230488	0.0161518	0.00105121	0.0139738	0.000194026		3.67423	0.0220071	0.000603979	0.0239206	0.000482466	0.0141419	0.000127279		107.043	41.8262	32.4628	31.7947	30.3619	38.2019	41.262	67.5231	107.201		107.043	0.000139906	5.05962e-05	5.20111e-05	5.91585e-05	0.000252601	0.000137388	0.0497309	93.2045
	3.69685	0.016731	0.00232764	0.0158777	0.000868375	0.0139	0.000218129		3.69685	0.021283	0.00102551	0.0231111	0.000782923	0.0140888	0.000116759		108.594	38.9877	29.5827	27.7601	26.9391	34.1909	38.7852	64.448	106.278		108.594	0.000100625	5.19589e-05	2.64444e-05	3.14061e-05	0.000177022	7.10961e-05	0.0382086	91.7093
	3.71932	0.0160617	0.00210525	0.0158083	0.000978787	0.0137736	0.00019796		3.71932	0.0207004	0.000644495	0.0226186	0.000581238	0.0139418	0.000123698		110.145	35.6381	27.1058	24.1599	24.1328	30.7138	36.274	61.6891	105.387		110.145	5.87498e-05	5.16395e-05	1.14804e-05	1.72046e-05	0.000199714	4.35458e-05	0.0306144	90.3854
	3.74166	0.0161244	0.00232724	0.0157434	0.000936496	0.0136833	0.000192053		3.74166	0.0200928	0.00065332	0.0219573	0.000511959	0.0138402	0.000115643		111.697	32.2605	25.2176	20.9213	21.9763	27.0247	33.6302	59.3076	104.561		111.697	6.19746e-07	6.01211e-05	-6.37724e-06	1.32393e-05	0.000212916	2.75872e-05	0.0260162	89.1804
	3.76386	0.0159858	0.00220641	0.015895	0.000800906	0.0135906	0.000187816		3.76386	0.0194545	0.000732074	0.0212204	0.000553265	0.0137623	0.000110062		113.248	28.9493	23.5945	17.8195	20.4227	23.3174	31.3009	57.1866	103.824		113.248	-4.97779e-05	7.28008e-05	-2.42522e-05	2.02538e-05	0.000274914	1.59304e-05	0.0226614	88.164
	3.78594	0.0155132	0.00217068	0.0155597	0.00091379	0.0134841	0.000184004		3.78594	0.0189232	0.000571686	0.0207864	0.00046652	0.0136443	0.000114753		114.799	25.4621	22.1356	14.6166	18.8229	19.3329	29.3336	55.5301	103.237		114.799	-6.15221e-05	6.37318e-05	-3.82533e-05	3.07409e-05	0.000402134	5.05887e-06	0.020475	87.3042
	3.82971	0.0143599	0.0024639	0.0148798	0.00170165	0.0132577	0.000183484		3.82971	0.0179784	0.000709207	0.0201022	0.000533783	0.0133937	0.000135628		116.351	23.5033	21.3908	12.0929	17.2696	15.3193	28.0233	54.0399	102.75		116.351	-2.13803e-05	4.46323e-05	-4.2637e-05	2.19397e-05	0.000601117	-7.65495e-06	0.0185953	86.5796
	3.85141	0.0151041	0.00202905	0.0151983	0.000998081	0.0132117	0.000178196		3.85141	0.0173818	0.000554739	0.0191928	0.00048059	0.0133526	0.000108003		117.902	23.5295	21.7856	11.3942	15.4809	12.0366	26.8745	52.6944	102.34		117.902	0.000108199	2.3448e-05	-4.43369e-05	-8.50901e-06	0.000836122	-1.69888e-05	0.0171044	86.0805
	3.87298	0.0148347	0.00213793	0.0149276	0.00108275	0.0131162	0.000174485		3.87298	0.0169702	0.000539812	0.0187459	0.000404164	0.0132577	0.000108655		119.453	23.8462	21.9479	11.7127	14.0184	9.84959	25.6434	51.4553	102.006		119.453	0.000290339	1.78102e-05	-4.00104e-05	-4.26916e-05	0.0010681	-2.81542e-05	0.0152989	85.7998
	3.89444	0.0151701	0.00241834	0.0145221	0.000820328	0.0130746	0.000198149		3.89444	0.0164969	0.000904797	0.0180711	0.000599622	0.0132318	9.28165e-05		121.005	24.036	20.9631	12.4151	12.6558	10.061	24.858	50.518	101.749		121.005	0.000665018	1.30501e-05	-4.85454e-05	-6.48047e-05	0.00125026	-4.46075e-05	0.0137093	85.7204
	3.937	0.0144907	0.00195011	0.0147698	0.00113954	0.0128697	0.000168207		3.937	0.015523	0.000515178	0.0172359	0.000554162	0.0129946	0.000100884		122.556	24.1026	19.3729	13.806	11.455	11.808	24.3179	50.1482	101.581		122.556	0.0016123	7.29305e-06	-6.48982e-05	-5.82411e-05	0.00129947	-6.02953e-05	0.0126911	85.7611
	3.95811	0.0142384	0.00193745	0.0143212	0.000928749	0.0127973	0.00017591		3.95811	0.0151238	0.000526421	0.0168708	0.000422314	0.0129257	0.000101754
	4	0.0139983	0.00193477	0.0141301	0.00115462	0.0126269	0.000176607		4	0.014393	0.000526707	0.0161561	0.000468433	0.0127405	0.0001071			Standard deviation [protein] /mM at [NaCl]=0,1e-6,…1e0 b^-3										Standard deviation [protein] /mM at [NaCl]=0,1e-6,…1e0 b^-3
	4.02078	0.0135879	0.0022821	0.013829	0.00110921	0.0125444	0.000163551		4.02078	0.0140642	0.000468406	0.0157128	0.000436644	0.0126711	0.000101543		z / Å	0	1e-6	1e-5	1e-4	1e-3	1e-2	1e-1	1e0		z / Å	0	1e-6	1e-5	1e-4	1e-3	1e-2	1e-1	1e0
	4.04145	0.0138746	0.00187652	0.0140433	0.00100802	0.0124919	0.000162593		4.04145	0.0135567	0.000496352	0.015157	0.000375803	0.0126096	9.02042e-05		0	7.29766	9.5022	6.86549	8.50023	13.5182	6.80719	12.5621	1.23284		0	0.00585664	5.42158e-05	0.000139894	0.000102843	0.00298805	0.000186975	0.0080098	3.66709
	4.06202	0.0134375	0.00187045	0.0140007	0.00118683	0.0124029	0.000157232		4.06202	0.0131187	0.000406718	0.0148773	0.000376715	0.0125154	9.85269e-05		1.55134	7.91008	9.14355	6.52777	8.05645	13.6485	6.38642	12.4411	1.21348		1.55134	0.0074302	6.33423e-05	0.000128212	6.52384e-05	0.00220631	0.000147801	0.0088069	3.58773
	4.08248	0.0136428	0.00160495	0.0142036	0.00104419	0.0123476	0.000146328		4.08248	0.0126356	0.000602517	0.0142023	0.000399394	0.0124719	8.50933e-05		3.10269	8.49343	8.57279	6.33971	8.66502	14.4884	6.10834	12.0029	1.19404		3.10269	0.00643633	6.65927e-05	0.000101253	3.35426e-05	0.00135998	0.000116052	0.0101662	3.51442
	4.10284	0.01334	0.00166901	0.0136373	0.000925011	0.0122761	0.000158756		4.10284	0.0124637	0.000429406	0.0140212	0.000343362	0.0123908	8.90389e-05		4.65403	8.65944	8.53049	7.21982	10.2261	14.9719	6.0853	11.3418	1.14929		4.65403	0.00401812	7.42586e-05	7.45231e-05	2.545e-05	0.000673386	6.84382e-05	0.0117247	3.43821
	4.12311	0.0133607	0.00136853	0.013416	0.000809653	0.0122324	0.000168108		4.12311	0.0120502	0.000608848	0.0134842	0.000579733	0.0123546	8.4014e-05		6.20537	7.9054	9.28801	8.48298	11.5321	14.6336	5.72426	10.8394	1.09906		6.20537	0.00229389	8.2331e-05	4.25703e-05	2.86163e-05	0.000260444	6.66911e-05	0.0128245	3.41799
	4.16333	0.0130735	0.00148973	0.0133749	0.000844732	0.0120873	0.000153765		4.16333	0.0114596	0.000506302	0.0128658	0.000364059	0.012196	8.23257e-05		7.75672	7.42373	9.51235	8.48546	12.8785	13.0325	5.87601	10.157	1.07466		7.75672	0.00095526	8.42942e-05	2.99943e-05	2.73248e-05	9.92577e-05	7.90228e-05	0.0140218	3.47335
	4.1833	0.0130125	0.00167971	0.0128949	0.000653701	0.0120332	0.000172302		4.1833	0.011327	0.000563706	0.0126531	0.000619697	0.0121439	8.4583e-05		9.30806	7.22015	9.32603	7.54279	13.2489	11.826	5.76577	9.13139	1.06429		9.30806	0.000476286	8.34819e-05	3.61163e-05	2.32531e-05	4.79584e-05	9.80733e-05	0.0151827	3.48259
	4.20317	0.0130484	0.00173752	0.0131861	0.000983797	0.0119621	0.000159845		4.20317	0.01098	0.000486053	0.0124043	0.000330926	0.0120577	7.52157e-05		10.8594	7.01228	9.65771	7.31968	13.616	11.0365	5.90577	8.04562	1.02879		10.8594	0.000268744	8.03133e-05	7.02839e-05	2.25483e-05	2.65818e-05	0.000111122	0.0158044	3.51171
	4.22295	0.0126803	0.00163175	0.0131456	0.00111425	0.0118771	0.000139117		4.22295	0.0106536	0.000502972	0.0120204	0.000376605	0.0119727	7.8265e-05		12.4107	7.03911	9.37892	7.23984	14.7296	10.4072	6.38575	6.89069	1.00446		12.4107	0.000165482	8.64526e-05	9.69959e-05	3.02027e-05	3.64224e-05	0.000116803	0.0155902	3.52884
	4.24264	0.0125986	0.00195821	0.0125149	0.000648665	0.0118592	0.000174856		4.24264	0.0104712	0.000658062	0.0117455	0.00071207	0.0119695	7.8557e-05		13.9621	6.5113	8.17844	7.74539	15.4968	9.6643	7.05594	5.88713	0.952048		13.9621	0.000109271	9.85405e-05	0.00010506	4.95466e-05	6.11088e-05	0.000115468	0.0134232	3.57351
	4.26224	0.0123965	0.00148633	0.0127226	0.000854832	0.0117665	0.000148447		4.26224	0.0101718	0.000418618	0.0114682	0.000312258	0.0118592	8.06043e-05		15.5134	5.50179	7.25586	8.86955	14.858	8.88287	7.7217	5.32949	0.898803		15.5134	0.000100171	0.000110066	0.000120235	8.77316e-05	0.000109814	0.00012165	0.0113385	3.57791
	4.28174	0.0122673	0.00175053	0.0125702	0.00078976	0.0117071	0.000150048		4.28174	0.00997348	0.000382941	0.011251	0.000370669	0.0118015	7.96396e-05		17.0648	4.70619	6.5126	9.84567	13.5558	9.19045	8.35799	5.15443	0.892023		17.0648	0.000146754	0.000142391	0.000144351	0.000158094	0.000193487	0.000200948	0.0107448	3.58057
	4.33974	0.0122262	0.00155374	0.0125719	0.000898583	0.0115622	0.000148815		4.33974	0.00905521	0.000433697	0.010415	0.000263141	0.0116463	7.07073e-05		18.6161	4.83921	6.68089	10.7262	12.2528	9.99905	9.28182	5.33587	0.881755		18.6161	0.000264588	0.000232974	0.000219708	0.000294141	0.000326482	0.000381476	0.0217591	3.57963
	4.3589	0.0115692	0.00158902	0.0126378	0.00149659	0.0114382	0.00011925		4.3589	0.00874979	0.0004652	0.0101798	0.00045986	0.0115181	8.56746e-05		20.1675	6.30244	8.46071	11.6319	11.8494	10.9243	10.4323	5.67723	0.90759		20.1675	0.000497462	0.000421424	0.000409176	0.000537911	0.000550302	0.000713555	0.0429047	3.45723
	4.37798	0.0118818	0.00132183	0.0123805	0.000994609	0.011426	0.000147181		4.37798	0.00877183	0.00038017	0.00999342	0.000392425	0.0114937	7.55507e-05		21.7188	8.30334	10.0794	12.4676	11.9434	11.3336	11.339	6.10215	0.938268		21.7188	0.000948772	0.000791895	0.000797127	0.000990143	0.000906183	0.00128206	0.0621441	3.31735
	4.39697	0.0115958	0.0015282	0.0120268	0.000914403	0.0113579	0.000136454		4.39697	0.00864225	0.000334768	0.00976101	0.000317898	0.0114359	7.85439e-05		23.2702	10.1245	10.9777	13.1446	12.1767	11.4623	11.8403	6.31621	0.888062		23.2702	0.00176527	0.00147959	0.00156218	0.00180535	0.00150714	0.00227111	0.0774166	3.09945
	4.41588	0.0117442	0.00141339	0.0123293	0.00104047	0.0113258	0.000120723		4.41588	0.00813868	0.000496206	0.00937106	0.000275924	0.0114022	6.98555e-05		24.8215	11.8223	10.8581	13.6675	12.4014	11.2953	11.8591	6.02013	0.837335		24.8215	0.0033336	0.00259928	0.00305191	0.00324153	0.00265944	0.00406324	0.103945	2.83259
	4.43471	0.0117574	0.00141481	0.0123264	0.00109847	0.0112831	0.000125815		4.43471	0.00794823	0.000447681	0.00914875	0.000297724	0.0113551	6.77169e-05		26.3728	12.8792	10.3863	13.5533	12.3282	11.1566	11.0179	5.37692	0.78995		26.3728	0.00623251	0.00441291	0.0058008	0.00580746	0.00518899	0.00748122	0.145098	2.66557
	4.47214	0.0117382	0.00159455	0.0118353	0.000924617	0.0112233	0.000157008		4.47214	0.00774334	0.000469962	0.00886894	0.000376224	0.0112885	6.22778e-05		27.9242	13.4407	10.4509	13.1414	12.3435	11.138	9.64062	4.6379	0.728775		27.9242	0.0116518	0.00734309	0.0104754	0.01031	0.0127993	0.0136893	0.199751	2.46362
	4.49073	0.0110408	0.00139253	0.0118126	0.00109651	0.0110951	0.000120215		4.49073	0.00753819	0.000361443	0.00855625	0.000389773	0.0111672	7.33017e-05		29.4755	13.8667	12.2598	12.6439	12.5196	11.401	8.35786	4.15221	0.658989		29.4755	0.0211742	0.0122395	0.0184688	0.0178715	0.037335	0.0237878	0.257971	2.17286
	4.50925	0.0111158	0.00100093	0.0115291	0.000719531	0.0110739	0.000135231		4.50925	0.00739512	0.000302286	0.0083769	0.000312665	0.0111412	7.3498e-05		31.0269	13.7353	13.4911	11.2642	12.6391	11.0012	7.6378	4.10733	0.565131		31.0269	0.0356478	0.0209525	0.0324505	0.0305041	0.103649	0.0390176	0.325432	1.83937
	4.52769	0.0110151	0.00109177	0.0110342	0.000667092	0.0110483	0.000148166		4.52769	0.00734725	0.00048863	0.00811732	0.000764203	0.0111353	8.09291e-05		32.5782	13.788	13.5001	9.77605	12.076	10.018	7.2219	4.36001	0.46479		32.5782	0.0601279	0.0369195	0.0564736	0.0517811	0.264054	0.0624929	0.415083	1.42088
	4.56435	0.01102	0.00122741	0.0113287	0.000598009	0.0109525	0.000137594		4.56435	0.00697542	0.000300993	0.00787323	0.000336648	0.0110153	6.66838e-05		34.1296	13.5547	12.5975	8.24033	11.4468	8.78957	6.5806	4.68248	0.412681		34.1296	0.10201	0.0649982	0.0958151	0.086229	0.644387	0.0998996	0.527431	1.05027
	4.58258	0.0111552	0.00113948	0.0112794	0.000689476	0.0109337	0.000136162		4.58258	0.00674597	0.000428786	0.00757601	0.000290722	0.0109968	6.66669e-05		35.6809	13.5428	11.3556	6.79148	11.8162	8.4297	5.73935	5.09625	0.4373		35.6809	0.161053	0.112424	0.156221	0.141834	1.32166	0.156802	0.65566	0.93958
	4.6188	0.0105645	0.00159886	0.0120606	0.00197629	0.0107626	7.34737e-05		4.6188	0.00552736	0.000800448	0.00715413	0.000775292	0.0108229	8.80293e-05		37.2322	13.7558	9.88156	5.43651	12.4583	8.45312	5.35556	5.49958	0.537323		37.2322	0.300276	0.190033	0.244582	0.225861	1.21763	0.249915	0.831115	1.08554
	4.63681	0.0105947	0.00111842	0.0112047	0.000808425	0.0107618	0.000114415		4.63681	0.00616162	0.000331844	0.00711861	0.00022023	0.0108151	6.5292e-05		38.7836	12.8865	8.33445	4.94196	12.6032	7.94048	5.46803	5.89312	0.665466		38.7836	0.479646	0.329055	0.381049	0.357048	1.40106	0.401115	1.13393	1.44948
	4.65475	0.0108605	0.00120756	0.0113065	0.000863967	0.0107607	0.000108776		4.65475	0.00586546	0.000522426	0.00685123	0.000117931	0.0108213	7.1876e-05		40.3349	11.1454	7.14186	5.27078	12.3644	7.89506	6.51766	6.20544	0.800284		40.3349	0.760677	0.585877	0.633411	0.539364	0.691314	0.641973	1.71026	1.99662
	4.67262	0.0106439	0.00108875	0.0111676	0.000751299	0.0107024	0.000111723		4.67262	0.00585058	0.000373835	0.00676586	9.88275e-05	0.0107563	6.59063e-05		41.8863	9.78151	6.60913	6.2327	12.963	8.77288	8.15633	6.19931	0.890025		41.8863	1.39522	1.07576	1.14552	0.891828	0.75972	0.991362	2.75885	2.59251
	4.69042	0.010327	0.00109356	0.0112308	0.00111762	0.0106289	0.000109384		4.69042	0.00561028	0.000422086	0.0066967	0.000419163	0.0106674	6.38183e-05		43.4376	9.19637	7.57005	7.74366	14.0061	10.0576	9.17061	5.70843	0.888787		43.4376	2.75794	2.0669	2.19862	1.52043	1.1062	1.47319	4.54031	3.1994
	4.70815	0.0100299	0.0012322	0.010874	0.000937019	0.0105532	0.000119091		4.70815	0.00585748	0.000471546	0.00657107	0.000350182	0.0105967	7.30597e-05		44.989	9.03697	8.91947	10.3119	14.7521	11.1362	9.98495	5.11616	0.850996		44.989	5.5449	4.37164	4.31806	3.0754	2.05822	2.48443	7.47162	3.8718
	4.72582	0.0102701	0.0010231	0.0108976	0.000697777	0.0105703	0.000117314		4.72582	0.00556172	0.000295396	0.0063888	0.000264333	0.0106139	6.15706e-05		46.5403	9.91756	9.98929	12.7564	14.9571	12.2622	10.2638	4.78532	0.807753		46.5403	10.9247	9.62302	7.5811	6.25955	4.20414	4.74868	11.6584	4.6089
	4.76095	0.00994333	0.00135619	0.0107845	0.00102865	0.0104345	9.42257e-05		4.76095	0.00540461	0.00040439	0.0059758	0.000520846	0.0104861	6.02344e-05		48.0916	11.8054	12.0071	14.8431	16.0466	13.976	11.0966	4.73033	0.757544		48.0916	18.9674	18.5843	12.289	11.5793	8.79877	10.2496	17.4024	5.29584
	4.77842	0.010252	0.00118897	0.0108315	0.000833943	0.0104543	9.39871e-05		4.77842	0.0051196	0.000480685	0.00587085	0.000251452	0.0104939	6.51439e-05		49.643	14.9885	14.1723	15.374	18.8753	15.536	12.1743	4.96864	0.744517		49.643	28.9909	34.7839	17.0666	20.6564	18.1149	19.8808	23.6489	5.79474
	4.79583	0.00988549	0.0011211	0.0104417	0.000647893	0.0104065	0.000116733		4.79583	0.0052546	0.000263158	0.00586358	0.00031217	0.010454	6.18694e-05		51.1943	17.5643	15.9143	16.7127	21.9089	16.9915	12.6849	5.48547	0.771646		51.1943	42.8254	55.023	21.7232	32.0331	31.4421	31.8261	28.9792	6.22109
	4.81318	0.00988814	0.00103382	0.01056	0.000732701	0.0103725	0.000109465		4.81318	0.00492552	0.000351586	0.00572795	0.000290966	0.010405	6.08854e-05		52.7457	19.7504	18.9994	19.0451	24.388	18.7473	12.4969	6.1913	0.745935		52.7457	56.5607	71.0731	28.2072	40.1271	40.7667	44.6583	29.6899	6.54721
	4.83046	0.0100256	0.00103727	0.0107562	0.000888247	0.010337	9.23892e-05		4.83046	0.00479522	0.000424247	0.00548662	0.000420037	0.0103626	6.39042e-05		54.297	22.0772	21.6714	20.5673	27.0634	21.2582	12.8008	7.01352	0.717312		54.297	65.8626	71.8859	39.4419	36.7972	41.072	52.1567	26.522	6.66904
	4.84768	0.00999905	0.000949687	0.0105289	0.000752754	0.0103467	0.000132352		4.84768	0.00488747	0.000304209	0.00560573	0.000405711	0.010369	6.2114e-05		55.8484	24.5044	22.8274	19.2787	30.1286	23.1373	13.7399	7.71822	0.810203		55.8484	65.2465	51.493	53.1197	26.4296	37.9313	49.9017	29.1566	6.65698
	4.86484	0.00928612	0.00142532	0.0102546	0.000913653	0.0101934	0.000112217		4.86484	0.00490598	0.000504412	0.00536524	0.00041534	0.0102353	7.75409e-05		57.3997	25.9876	23.386	16.9228	31.7565	24.5079	15.0449	8.05879	0.981072		57.3997	62.7123	27.0838	62.6195	32.3653	39.0407	44.4828	37.9433	6.55391
	4.89898	0.00932408	0.00132198	0.00992031	0.000752807	0.010171	0.000105497		4.89898	0.00449995	0.000408844	0.00499616	0.000259806	0.0102162	6.34803e-05		58.9511	26.6817	24.127	15.0738	32.6945	24.8859	16.116	8.36912	1.12892		58.9511	58.3388	32.0217	63.0144	52.4976	47.8857	38.5836	48.3894	6.42016
	4.91596	0.00973672	0.000867552	0.0102171	0.000604535	0.0101964	9.59043e-05		4.91596	0.00421502	0.0003874	0.00491322	0.000205724	0.0102315	7.12042e-05		60.5024	26.496	23.9889	13.0862	31.6298	25.4063	17.0878	8.66863	1.17815		60.5024	54.2612	52.1357	52.3164	63.7256	60.4663	39.7344	53.4662	6.21185
	4.93288	0.00962237	0.000928713	0.0101847	0.000661365	0.0101547	9.71688e-05		4.93288	0.00416064	0.000358746	0.00488113	0.000231618	0.0101842	6.44411e-05		62.0537	24.9157	23.3825	11.9739	28.584	25.2834	18.4727	8.6768	1.17625		62.0537	53.8382	59.5979	40.0951	62.6979	65.2767	45.4634	46.8361	5.87954
	4.94975	0.00971894	0.00115717	0.0101814	0.000685719	0.0101359	0.000106005		4.94975	0.00430838	0.000449582	0.00481677	0.000256345	0.0101622	6.28689e-05		63.6051	21.9623	23.2399	12.326	26.835	25.5176	20.8035	8.69282	1.13742		63.6051	58.1398	57.4905	32.5701	44.3187	59.2322	52.0069	32.2516	5.61214
	4.96655	0.0101583	0.00124109	0.0095415	0.00194377	0.0102592	0.000167947		4.96655	0.00433011	0.000735294	0.00463593	0.00116614	0.0103135	0.0001238		65.1564	20.556	22.477	13.916	25.1727	26.1664	23.5743	9.01444	1.04268		65.1564	66.5488	47.2506	38.3134	22.1727	43.5881	51.8942	24.7561	5.21585
	4.98331	0.00930074	0.000971922	0.00991685	0.000523112	0.0100364	9.07048e-05		4.98331	0.00395235	0.000373152	0.00444333	0.000251669	0.0100759	6.26908e-05		66.7078	20.054	20.8467	15.8214	22.2257	25.5425	25.3876	9.68897	0.992154		66.7078	70.7754	37.2991	46.0857	22.4846	40.6646	52.5629	26.7833	4.7024
	5	0.00945796	0.000967002	0.0102027	0.000820075	0.0100162	8.59012e-05		5	0.00385097	0.000442775	0.0044643	0.00035569	0.0100295	6.27616e-05		68.2591	19.0268	19.7283	16.4619	20.4547	24.3138	25.7313	10.6878	0.976767		68.2591	61.7357	32.2232	47.4867	33.6575	54.3298	53.5364	32.8459	4.13657
	5.03322	0.00929994	0.000679041	0.00982262	0.000556683	0.00998297	0.000118482		5.03322	0.00395905	0.000317337	0.00438385	0.000280031	0.0100052	6.72267e-05		69.8105	16.5295	19.209	15.8268	19.0886	22.4622	24.8684	12.0409	0.938272		69.8105	43.1762	27.8913	46.7545	34.7625	62.0687	49.0184	34.1311	3.5129
	5.04975	0.00906425	0.000846159	0.00981406	0.000444242	0.00991022	9.40191e-05		5.04975	0.00373072	0.000287959	0.00417576	0.000254736	0.00993316	5.69513e-05		71.3618	14.1065	18.5777	14.2885	16.4976	20.0862	22.6201	13.1995	0.884815		71.3618	27.5663	20.5958	39.3684	23.9981	55.7831	34.479	29.7967	2.8687
	5.06623	0.00929137	0.00105582	0.00969096	0.000578472	0.00993742	0.000100236		5.06623	0.00361578	0.000401128	0.00413604	0.000267389	0.00996292	7.18511e-05		72.9131	12.7836	17.9442	12.743	14.5479	17.6021	19.0219	13.6878	0.86324		72.9131	15.9672	14.1025	28.0463	13.1584	42.198	21.2687	22.3773	2.30423
	5.08265	0.00881668	0.000817612	0.0096984	0.000547294	0.00983389	0.000103517		5.08265	0.00366329	0.000386876	0.00405223	0.000359478	0.00984919	5.59266e-05		74.4645	12.5748	16.1772	11.8198	14.2313	15.9488	15.89	13.6181	0.912978		74.4645	7.87322	9.44734	16.2251	6.28603	26.6509	12.632	15.653	1.88609
	5.11534	0.00957065	0.00139947	0.00962944	0.00113145	0.00992318	0.000128094		5.11534	0.00355894	0.000378243	0.00400188	0.000400095	0.00993779	8.68983e-05		76.0158	12.6769	13.303	11.4563	14.0455	14.1545	12.7397	13.3838	0.94833		76.0158	3.84935	5.57597	8.27688	3.15055	14.1986	7.41146	10.5286	1.60007
	5.1316	0.00902071	0.00111082	0.009762	0.000668867	0.00976811	7.26219e-05		5.1316	0.00330476	0.000469458	0.00374531	0.000392773	0.00977407	6.3006e-05		77.5672	12.3499	9.80003	10.8969	13.0366	12.9057	9.36389	13.1122	0.979105		77.5672	1.94509	3.04852	4.17966	1.68137	7.10085	4.21894	7.06472	1.37071
	5.16398	0.0094353	0.00155623	0.00954175	0.00156403	0.00986672	0.000135563		5.16398	0.00340851	0.000509371	0.00390364	0.00054081	0.00988682	9.66885e-05		79.1185	11.6309	7.36576	9.30055	12.2616	13.348	6.39645	12.6048	1.02653		79.1185	1.07972	1.67551	2.20721	0.923478	3.59639	2.43949	4.77206	1.24161
	5.18009	0.00877071	0.000884192	0.00949991	0.000471977	0.00969725	9.17572e-05		5.18009	0.00324189	0.00031055	0.00361044	0.000224474	0.00970902	5.78995e-05		80.6699	11.9888	7.00217	7.54065	11.5847	14.4591	5.03579	11.7421	1.03644		80.6699	0.66231	0.778438	1.64933	0.541964	1.96128	1.39272	3.33228	1.23698
	5.19615	0.00867514	0.000676843	0.00946926	0.00048121	0.00967553	0.000101032		5.19615	0.00313606	0.000315282	0.00351593	0.000427961	0.00968248	5.73504e-05		82.2212	12.4146	6.28206	6.90355	9.44801	15.5248	6.94769	10.6465	1.01352		82.2212	0.405421	0.420864	0.972544	0.333972	1.40964	2.8027	2.41579	1.22435
	5.21217	0.00867218	0.00187015	0.00956189	0.00181035	0.00957506	5.63716e-05		5.21217	0.00227805	0.000798816	0.00323552	0.000805459	0.00958952	8.778e-05		83.7725	12.6958	5.03874	6.13722	6.6707	15.9799	9.17709	9.28141	0.995353		83.7725	0.240848	1.14116	0.425875	0.212402	1.67195	1.96076	1.8421	1.1761
	5.22813	0.00875305	0.000843494	0.00932696	0.00057032	0.0096408	9.04286e-05		5.22813	0.00293373	0.00027789	0.00334372	0.000350693	0.00965255	6.01116e-05		85.3239	13.3245	4.97358	5.80969	5.21507	16.1515	10.9311	7.65445	0.953321		85.3239	0.143111	2.12794	0.277379	0.127932	2.14752	1.01876	1.32431	1.21102
	5.24404	0.00847063	0.00141395	0.00942585	0.000905813	0.00953286	5.46797e-05		5.24404	0.00264421	0.000528168	0.00317178	0.000512413	0.0095402	5.81383e-05		86.8752	13.222	6.85646	5.90914	5.33881	15.7109	12.0511	5.96896	0.852995		86.8752	0.0868382	1.67087	0.161242	0.068878	3.40172	0.574395	1.03234	1.32562
	5.25991	0.00826821	0.0011607	0.00922446	0.000570518	0.00950572	7.92693e-05		5.25991	0.00283538	0.000319903	0.0030916	0.000427711	0.0095181	4.91684e-05		88.4266	12.9491	8.45839	6.7612	5.1737	15.1481	12.7657	4.4258	0.746117		88.4266	0.0519722	1.24817	0.0962494	0.0377265	4.19548	0.337439	0.848761	1.38432
	5.2915	0.00844809	0.001724	0.00932936	0.00115106	0.00946293	5.09769e-05		5.2915	0.00232852	0.000537064	0.00292212	0.000624485	0.00946198	7.11229e-05		89.9779	12.7927	8.81877	8.18701	5.70022	14.5866	13.0167	3.43906	0.67917		89.9779	0.0305049	0.638543	0.0595541	0.0227144	1.09416	0.154234	0.680615	1.4517
	5.30723	0.00897916	0.00137967	0.00916037	0.00119819	0.00963382	0.000129005		5.30723	0.00284891	0.000427958	0.00327021	0.000504953	0.00962692	8.90598e-05		91.5293	12.4857	8.88223	10.0215	6.93314	13.6709	12.8845	3.441	0.671401		91.5293	0.0179173	0.269106	0.0354336	0.0124787	0.505432	0.0644452	0.547168	1.5208
	5.32291	0.00851754	0.000966555	0.00905561	0.000594723	0.00951787	9.24634e-05		5.32291	0.00270977	0.000278557	0.00295819	0.000198454	0.00953003	6.91226e-05		93.0806	12.2591	9.21148	11.2973	8.23228	13.0869	12.5185	4.17736	0.734471		93.0806	0.0103668	0.112074	0.0208304	0.00786002	0.064777	0.028902	0.410778	1.57962
	5.33854	0.00855239	0.0011673	0.00917213	0.000508429	0.00948885	7.54426e-05		5.33854	0.00255151	0.000384018	0.00287576	0.000253774	0.00948933	7.24726e-05		94.632	11.6506	9.83115	11.4358	9.28231	12.869	11.6133	5.15867	0.766163		94.632	0.00591358	0.0427398	0.0118105	0.00466389	0.105889	0.0136939	0.296243	1.62098
	5.35413	0.00787269	0.00145039	0.0089574	0.000456049	0.00932535	9.25921e-05		5.35413	0.00271994	0.000539036	0.00274157	0.000330884	0.00935113	6.12046e-05		96.1833	10.9624	10.2554	11.2552	10.5907	12.3012	10.6493	6.07207	0.769148		96.1833	0.00338974	0.0130962	0.00670122	0.00308925	0.0666378	0.00717274	0.215886	1.65408
	5.36967	0.00845529	0.00100512	0.00905834	0.000527881	0.0094515	8.94522e-05		5.36967	0.00253655	0.000367228	0.00287382	0.000294583	0.00944682	7.04733e-05		97.7346	10.4084	10.245	11.3473	11.4382	11.7538	10.1284	6.92054	0.794709		97.7346	0.00198367	0.00354309	0.00374964	0.00182457	0.0300588	0.00378286	0.154127	1.68121
	5.38516	0.00841584	0.000986396	0.00894592	0.000583417	0.00943932	9.38502e-05		5.38516	0.00253971	0.00028275	0.00275424	0.000228899	0.00944895	7.59957e-05		99.286	9.7749	10.2213	11.5694	11.9639	11.7364	9.93569	7.77735	0.812654		99.286	0.00112342	0.0013118	0.0021133	0.00106584	0.0102276	0.00197405	0.105821	1.72505
	5.41603	0.00855553	0.00123401	0.0090218	0.0010501	0.00944594	0.000126158		5.41603	0.00249369	0.000727139	0.00283894	0.000652609	0.00941385	7.94537e-05		100.837	9.24412	10.0831	11.4919	12.3293	12.0136	9.84641	8.54877	0.82385		100.837	0.000620418	0.000726461	0.0011925	0.000644184	0.00451732	0.00110301	0.0771955	1.84101
	5.43139	0.00817676	0.00100337	0.0086484	0.000919568	0.00936951	0.000127673		5.43139	0.00249947	0.000626112	0.00239554	0.000649059	0.00939575	8.04813e-05		102.389	8.05712	10.1408	11.5553	12.5339	12.5453	9.37259	9.31035	0.804205		102.389	0.000347326	0.000419531	0.000649105	0.000388912	0.00328211	0.000645041	0.0550873	1.96289
	5.44671	0.00837999	0.00100805	0.00885608	0.000812223	0.00938105	0.000102973		5.44671	0.00238959	0.000375867	0.00265676	0.00038774	0.00937197	7.89144e-05		103.94	6.21609	9.65559	11.344	12.3197	12.6711	8.61735	10.1061	0.7709		103.94	0.000246603	0.000242742	0.000347017	0.000225621	0.00142818	0.000396835	0.0393609	2.1378
	5.46199	0.00828015	0.000885825	0.00876485	0.000726588	0.00933547	0.000100168		5.46199	0.00235095	0.000227836	0.00251138	0.000310492	0.00934204	7.43585e-05		105.491	4.64998	9.3327	10.5242	11.7165	12.4374	8.37289	10.8377	0.700778		105.491	0.00022368	0.000157522	0.000173136	0.000152331	0.000377892	0.000240677	0.0283716	2.26616
	5.47723	0.00793837	0.00140646	0.00880917	0.000373776	0.00921329	6.39305e-05		5.47723	0.00219317	0.000320926	0.00242816	0.000349597	0.00920891	5.1043e-05		107.043	4.24681	9.01532	8.96479	11.1723	11.9629	8.87337	11.2786	0.652207		107.043	0.000197525	0.000134108	9.5332e-05	0.000102045	0.000325348	0.000163964	0.0203352	2.4305
	5.49242	0.00790467	0.00114835	0.00866858	0.000459987	0.00918585	7.04072e-05		5.49242	0.00212018	0.000316277	0.0022688	0.000417501	0.00918897	4.75125e-05		108.594	4.60463	8.74015	7.2738	11.4739	11.1857	9.24542	11.4909	0.655867		108.594	0.000160752	0.000143789	7.27221e-05	6.19798e-05	0.000348633	0.000104657	0.0159509	2.64435
	5.50757	0.00828106	0.00107986	0.00876134	0.000572646	0.00925508	7.48212e-05		5.50757	0.00207669	0.000456705	0.00240957	0.000380423	0.00925168	6.9683e-05		110.145	5.02069	8.72925	6.61274	12.1093	10.0209	9.08439	11.576	0.688513		110.145	0.000132139	0.00016138	7.30871e-05	3.73429e-05	0.000356491	5.59437e-05	0.0150538	2.86755
	5.53775	0.0082756	0.00130218	0.00874945	0.00072718	0.00924036	9.23279e-05		5.53775	0.00218638	0.000569879	0.00247446	0.000348498	0.00921174	7.83557e-05		111.697	5.93958	9.31195	5.89823	11.6635	9.66322	9.08416	11.8408	0.73651		111.697	0.000178047	0.000189358	7.68542e-05	3.04604e-05	0.00034845	3.34091e-05	0.0172598	3.0207
	5.55278	0.00795861	0.00117307	0.0086532	0.000427712	0.00914298	6.65383e-05		5.55278	0.00194179	0.000369636	0.00216937	0.000329546	0.00913439	5.61322e-05		113.248	6.84971	8.72571	6.00671	11.0393	10.1835	8.81373	12.1056	0.840514		113.248	0.000255134	0.0002031	9.2213e-05	4.63252e-05	0.000441162	2.38924e-05	0.0180934	3.11492
	5.56776	0.00817457	0.00114525	0.00870264	0.000584744	0.00917977	7.32243e-05		5.56776	0.00197813	0.00039472	0.00229355	0.00029777	0.00916728	7.14632e-05		114.799	8.439	7.30803	7.04832	10.3718	11.8343	8.5532	12.3178	0.971895		114.799	0.000329358	0.000160033	0.000104725	7.45195e-05	0.000697199	2.17435e-05	0.0173237	3.19599
	5.58271	0.00797484	0.00101875	0.00842721	0.000886779	0.00916164	9.7766e-05		5.58271	0.00204963	0.000363393	0.0021165	0.000406108	0.00916073	6.60669e-05		116.351	9.85181	5.86997	7.23144	9.47508	13.525	8.4685	12.5192	1.03079		116.351	0.000407258	9.53984e-05	9.68666e-05	5.20999e-05	0.00125612	3.43457e-05	0.0155838	3.3057
	5.61249	0.00795394	0.00109031	0.00852605	0.000479534	0.00910409	7.57215e-05		5.61249	0.00189555	0.000352898	0.00211681	0.000278008	0.0090871	6.24051e-05		117.902	10.7778	5.37577	6.77158	8.60194	14.4814	8.44357	12.7146	1.04621		117.902	0.000566388	3.7756e-05	8.51161e-05	2.76443e-05	0.00199093	4.64878e-05	0.0137213	3.4542
	5.62731	0.00755637	0.00224441	0.00846076	0.00098537	0.00896803	5.62354e-05		5.62731	0.00156728	0.000524145	0.00182096	0.000560199	0.00895183	5.57713e-05		119.453	10.547	6.05933	6.38308	7.95213	14.841	8.48139	12.8028	1.08992		119.453	0.000891309	3.51576e-05	6.19998e-05	0.000117055	0.00271535	7.77046e-05	0.0111592	3.57541
	5.65685	0.007053	0.00237408	0.00805777	0.00149457	0.00884348	0.000123416		5.65685	0.00166259	0.00121272	0.00110733	0.00118772	0.00886879	8.72433e-05		121.005	9.24604	7.30091	6.89813	7.33312	14.4703	7.79117	12.8592	1.14933		121.005	0.00176699	3.68121e-05	7.84582e-05	0.000173862	0.00324295	0.000130006	0.00917968	3.62963
	5.67157	0.00775472	0.00122917	0.00853412	0.000540395	0.00898062	6.92827e-05		5.67157	0.0018878	0.000503527	0.00195293	0.000250262	0.00896685	5.18918e-05		122.556	7.72889	8.67962	7.10326	8.4116	14.1336	7.2614	12.6563	1.21679		122.556	0.0042377	4.20749e-05	0.000118529	0.00015378	0.00339754	0.00017616	0.00805536	3.67632
	5.68624	0.00783388	0.000984154	0.00837992	0.000484139	0.00901092	8.25157e-05		5.68624	0.00177978	0.000298207	0.00185801	0.00028081	0.00899258	5.72105e-05
	5.70088	0.00787264	0.00101701	0.00840436	0.000866669	0.00902039	9.26834e-05		5.70088	0.00186295	0.000410638	0.00201227	0.000193239	0.00901036	6.87334e-05
	5.71548	0.00777097	0.00106718	0.00848237	0.000652432	0.00903158	9.5125e-05		5.71548	0.00171998	0.000640062	0.00193893	0.000359639	0.0089989	7.83719e-05
	5.73004	0.00761913	0.00144274	0.008297	0.000441801	0.00899272	7.18257e-05		5.73004	0.0015884	0.000314744	0.00181544	0.000273616	0.00897509	7.30694e-05
	5.74456	0.00771535	0.000943715	0.00812023	0.00106177	0.00901532	0.000107806		5.74456	0.00167955	0.00030656	0.00168585	0.000448921	0.00901471	7.8325e-05
	5.7735	0.00741252	0.00132947	0.00801202	0.000673955	0.00890956	8.28455e-05		5.7735	0.00148225	0.000393475	0.00148524	0.000423511	0.0089204	6.53594e-05
	5.78792	0.00780786	0.00117578	0.00822392	0.000749914	0.00900043	8.55862e-05		5.78792	0.00151108	0.000396658	0.00172318	0.000492642	0.00898405	8.93773e-05
	5.8023	0.00764964	0.00149224	0.00823333	0.000583131	0.0088431	6.54133e-05		5.8023	0.00141917	0.000582872	0.00174044	0.000481393	0.00880287	6.45508e-05
	5.81664	0.00787228	0.00140545	0.00820424	0.000706819	0.00889124	7.11866e-05		5.81664	0.00142529	0.000563951	0.00168648	0.000516201	0.0088485	7.21255e-05
	5.83095	0.00789293	0.00129781	0.00816543	0.000651103	0.00898027	7.99192e-05		5.83095	0.00142532	0.000549817	0.00160654	0.000638532	0.00896635	9.82478e-05
	5.84523	0.00780241	0.00113105	0.00830577	0.0010807	0.00893847	0.000105653		5.84523	0.00164011	0.000514411	0.00175303	0.000350586	0.00891609	9.0905e-05
	5.85947	0.00754137	0.0012222	0.0080631	0.000547641	0.0088328	7.52271e-05		5.85947	0.00145239	0.000259925	0.00153105	0.000231442	0.00881976	6.38949e-05
	5.88784	0.00767192	0.00163913	0.00823505	0.00111504	0.0087621	9.69791e-05		5.88784	0.00137431	0.000919843	0.00162538	0.000543277	0.00871139	7.94281e-05
	5.90198	0.00765748	0.00112267	0.008049	0.000541526	0.00881672	8.22969e-05		5.90198	0.00140861	0.000311474	0.00148968	0.000271627	0.00878649	6.70624e-05
	5.91608	0.00742666	0.00121445	0.00801848	0.000550076	0.00874968	8.03745e-05		5.91608	0.00132376	0.000627071	0.00139566	0.000234964	0.00871483	5.525e-05
	5.93015	0.00705109	0.00190822	0.00779679	0.000621037	0.00860223	6.527e-05		5.93015	0.00104078	0.000389068	0.00102415	0.00048775	0.00858173	4.20221e-05
	5.94418	0.00774189	0.00137777	0.00813862	0.000723473	0.00881431	8.43173e-05		5.94418	0.00140313	0.000360738	0.00161866	0.000342739	0.00877778	8.49874e-05
	5.95819	0.00757946	0.000962446	0.00774947	0.00133208	0.00877093	0.000106214		5.95819	0.00133683	0.000496925	0.0011944	0.000566559	0.00877642	7.30112e-05
	5.97216	0.00792722	0.00143055	0.00799913	0.00121362	0.00887269	0.000120612		5.97216	0.00147289	0.00068264	0.00154648	0.000569004	0.00882726	9.63535e-05
	6	0.00768388	0.00109949	0.00791489	0.000949705	0.0087733	9.37338e-05		6	0.00135684	0.000436491	0.00136288	0.000386997	0.00874845	8.25875e-05
	6.01387	0.00697458	0.00167067	0.00765226	0.000484921	0.00854011	6.10518e-05		6.01387	0.00100896	0.000294928	0.00104378	0.000356444	0.00851764	3.7348e-05
	6.02771	0.00714874	0.00164014	0.00784908	0.000410589	0.00858222	6.28715e-05		6.02771	0.00111728	0.000344804	0.00124918	0.00024529	0.00854627	4.44841e-05
	6.04152	0.00739495	0.00128108	0.00787415	0.00064597	0.00864509	8.85175e-05		6.04152	0.00128664	0.000545011	0.00128548	0.000156127	0.00860575	5.62433e-05
	6.06905	0.0075708	0.00108107	0.00778355	0.000740237	0.0086767	8.89866e-05		6.06905	0.00120514	0.000509237	0.0012426	0.000362344	0.00864055	6.73226e-05
	6.08276	0.0075784	0.00142324	0.00787539	0.000670892	0.00867054	9.2366e-05		6.08276	0.00122491	0.000478434	0.00142557	0.000432777	0.00862255	7.8561e-05
	6.1101	0.00706592	0.00169882	0.00771587	0.000406719	0.00849748	6.22831e-05		6.1101	0.000903029	0.000440557	0.00115338	0.000299776	0.00845069	4.37492e-05
	6.12372	0.00734626	0.00136894	0.00776756	0.000435754	0.00859446	7.44601e-05		6.12372	0.00101833	0.000396994	0.0011787	0.000351122	0.00854896	6.47107e-05
	6.13732	0.00721036	0.00121369	0.00768481	0.000492544	0.00861365	7.73669e-05		6.13732	0.000821826	0.000448418	0.000947954	0.000409511	0.00858063	6.71855e-05
	6.15088	0.00709442	0.00122817	0.00766257	0.000769972	0.00861266	7.99309e-05		6.15088	0.000907092	0.00036188	0.00112752	0.000223986	0.00857893	7.3693e-05
	6.16441	0.00744777	0.00106178	0.00740034	0.00115719	0.00853553	9.77788e-05		6.16441	0.000973482	0.000793175	0.000640553	0.000619849	0.0085108	5.28239e-05
	6.17792	0.00719465	0.00137931	0.00773448	0.00053053	0.00855965	7.26055e-05		6.17792	0.000953461	0.000371402	0.00104272	0.000147023	0.00852386	6.77069e-05
	6.19139	0.00728519	0.000964405	0.00765365	0.000774816	0.00860166	8.8958e-05		6.19139	0.000932885	0.000429328	0.000937522	0.000393864	0.00856795	7.42758e-05
	6.21825	0.00764663	0.00169255	0.00782716	0.00166866	0.00869212	0.000135447		6.21825	0.00135903	0.000713857	0.00150223	0.000457154	0.00864081	0.000103907
	6.23164	0.00739125	0.00114246	0.00768657	0.00102579	0.00859901	9.73322e-05		6.23164	0.00108146	0.000361849	0.00120317	0.000282875	0.00855445	7.97908e-05
	6.245	0.00713986	0.00127576	0.0075894	0.000429423	0.00846231	7.68791e-05		6.245	0.000882812	0.000286753	0.000961754	0.000141706	0.00841858	5.44008e-05
	6.25833	0.00797577	0.00233549	0.00790078	0.00263813	0.00898078	0.000159029		6.25833	0.00129167	0.000567131	0.00136241	0.00139355	0.00897397	0.000192055
	6.27163	0.00724119	0.00101189	0.00745362	0.00092898	0.00850071	9.66594e-05		6.27163	0.000970814	0.000451754	0.000979148	0.0002201	0.00845776	5.92597e-05
	6.2849	0.00715545	0.00149209	0.00764884	0.000446996	0.00845013	8.31892e-05		6.2849	0.000903052	0.000461549	0.000968902	0.000155733	0.00838503	5.71254e-05
	6.29815	0.00740961	0.000962304	0.00738252	0.00135371	0.00857409	9.23799e-05		6.29815	0.000882096	0.000450337	0.000873648	0.000572227	0.008559	9.18244e-05
	6.33772	0.00726583	0.00120253	0.00761441	0.000766153	0.00848591	9.6399e-05		6.33772	0.000878827	0.000512969	0.00100694	0.000246288	0.0084306	7.33937e-05
	6.35085	0.00737023	0.00112267	0.00757554	0.000865932	0.00850786	9.04195e-05		6.35085	0.000949616	0.000365839	0.00104262	0.00036965	0.00846309	8.11688e-05
	6.36396	0.00728792	0.00106196	0.007518	0.000404875	0.00841937	8.01196e-05		6.36396	0.000768793	0.000510682	0.000835207	0.000313304	0.00836361	5.73863e-05
	6.37704	0.00690732	0.00174227	0.00725537	0.000552135	0.00822624	7.17954e-05		6.37704	0.000593277	0.000397761	0.000739728	0.000293718	0.00818044	3.45012e-05
	6.3901	0.0073313	0.000870398	0.00739808	0.000609455	0.00839946	7.96474e-05		6.3901	0.000798869	0.000420839	0.000746209	0.000355477	0.00835308	5.22401e-05
	6.40312	0.00695799	0.00139221	0.00748254	0.000454004	0.00833362	8.64515e-05		6.40312	0.000744023	0.000307736	0.000862783	0.000157936	0.00827044	4.95435e-05
	6.4291	0.00707532	0.0016238	0.00772303	0.000831843	0.00834487	9.66544e-05		6.4291	0.000738883	0.000523433	0.000860992	0.000233028	0.00826137	5.91544e-05
	6.44205	0.0069585	0.00117351	0.00719646	0.000597942	0.00826344	8.09414e-05		6.44205	0.000576775	0.000343074	0.000638783	0.000220098	0.00821438	3.7868e-05
	6.45497	0.00742255	0.0010647	0.00747327	0.000898638	0.00846078	9.23566e-05		6.45497	0.000917033	0.000441474	0.00095885	0.000385483	0.00840185	7.65207e-05
	6.46787	0.00710525	0.00101563	0.00738745	0.000448156	0.0083153	8.19861e-05		6.46787	0.000719032	0.000293151	0.00078357	0.000224566	0.00826261	5.14772e-05
	6.49359	0.00661651	0.00222198	0.00759868	0.00146171	0.00815468	0.000103199		6.49359	0.000492393	0.000500471	0.000678786	0.000596916	0.00807581	5.52622e-05
	6.50641	0.0072048	0.00134372	0.00751265	0.000731564	0.00836933	0.000103958		6.50641	0.000795413	0.000509897	0.000861925	0.000226676	0.00829713	6.77233e-05
	6.53197	0.0068696	0.0027785	0.00774039	0.00331939	0.00911335	0.000156168		6.53197	0.000335045	0.00118512	0.00114131	0.00172865	0.0091105	0.000230636
	6.54472	0.00700414	0.00104461	0.00713234	0.000862534	0.00826528	8.26634e-05		6.54472	0.000451734	0.000574774	0.000523295	0.000311852	0.00822368	5.2868e-05
	6.55744	0.00676598	0.00138871	0.00728835	0.000645125	0.00826258	7.61398e-05		6.55744	0.000360599	0.00037572	0.000688249	0.00013963	0.00820801	6.04661e-05
	6.57013	0.00727838	0.00135459	0.00754186	0.000742905	0.0083809	0.00010604		6.57013	0.000851532	0.000629565	0.000831841	0.00029942	0.008299	7.30422e-05
	6.58281	0.00678541	0.0013287	0.00744666	0.000678329	0.00827708	9.01837e-05		6.58281	0.000568644	0.000188502	0.000779447	0.000225789	0.0082086	6.39717e-05
	6.59545	0.0070502	0.0010594	0.0073783	0.00097699	0.00835094	0.000100544		6.59545	0.000649108	0.000309155	0.000829087	0.000222755	0.00828669	6.89999e-05
	6.60808	0.00733627	0.000998318	0.0072122	0.00146109	0.00832735	0.000104919		6.60808	0.000732323	0.000718297	0.000631386	0.000431713	0.0082749	5.07248e-05
	6.63325	0.00704321	0.000950997	0.00722056	0.000864775	0.00826065	8.87085e-05		6.63325	0.000565724	0.000298543	0.000560373	0.000192258	0.00820076	5.27711e-05
	6.6458	0.00728086	0.00125409	0.00762341	0.000911513	0.00843847	0.00011517		6.6458	0.000925787	0.000372543	0.00100291	0.000559829	0.00836083	9.31874e-05
	6.65833	0.00704726	0.000966673	0.0072994	0.000371157	0.00821909	8.04901e-05		6.65833	0.000525047	0.000398865	0.000606728	0.000246914	0.00815562	5.09535e-05
	6.67083	0.00668972	0.00178423	0.00686946	0.000748951	0.00799921	7.20924e-05		6.67083	0.000146787	0.00035511	0.000370095	0.000346958	0.00795388	4.28009e-05
	6.68331	0.00698137	0.00169733	0.00741738	0.00102381	0.00820627	0.000125282		6.68331	0.000284137	0.00109745	0.000565212	0.000628153	0.00812647	5.89757e-05
	6.69577	0.00681686	0.00138668	0.0073332	0.000574843	0.00813988	9.0782e-05		6.69577	0.000436241	0.000270448	0.000668331	0.000148692	0.00806359	5.25727e-05
	6.7082	0.00694566	0.00113714	0.00724683	0.000381806	0.00814475	9.0563e-05		6.7082	0.000396053	0.000390905	0.000570771	0.000225963	0.00806865	4.29857e-05
	6.733	0.00719717	0.000909737	0.00685163	0.00157822	0.00818804	7.71755e-05		6.733	0.000386407	0.000637595	0.000477205	0.000397553	0.00817593	6.23589e-05
	6.74537	0.00708013	0.00112304	0.00773758	0.000811211	0.00829491	0.00010479		6.74537	0.000763486	0.000197802	0.000890617	0.00029994	0.00820961	8.50048e-05
	6.75771	0.00679641	0.00116995	0.0071793	0.000395179	0.00808314	8.34377e-05		6.75771	0.000374718	0.000329096	0.00051622	0.000192015	0.00801937	4.44038e-05
	6.77003	0.00696881	0.00122933	0.0072785	0.000941853	0.00821732	0.000112624		6.77003	0.000571917	0.000518676	0.000714811	0.000174112	0.008131	5.8047e-05
	6.78233	0.0072014	0.00118657	0.00737913	0.00102149	0.00833107	0.000108137		6.78233	0.000571773	0.000528975	0.000765047	0.000475908	0.00825512	8.1766e-05
	6.79461	0.00708911	0.00156378	0.00758821	0.00112616	0.00827932	0.000134032		6.79461	0.000717855	0.00088696	0.000725613	0.000387701	0.00817422	6.96778e-05
	6.80686	0.00675631	0.00139657	0.0073965	0.00084058	0.00810668	0.000119005		6.80686	0.00051366	0.000166512	0.000642216	0.00023651	0.00800795	6.03828e-05
	6.8313	0.00657561	0.00167037	0.00651623	0.000986948	0.00784779	8.19961e-05		6.8313	-0.000175277	0.000364833	0.000260532	0.000375426	0.0078046	5.6457e-05
	6.84349	0.00691979	0.00109812	0.0072448	0.000474257	0.00809649	8.91024e-05		6.84349	0.000369342	0.000350744	0.00048899	0.000139348	0.00801905	4.81101e-05
	6.85565	0.00717774	0.00102925	0.00689087	0.00123871	0.0081375	8.65375e-05		6.85565	0.000387852	0.000483961	0.000573167	0.000352541	0.0080961	5.3977e-05
	6.8678	0.0069777	0.00120255	0.00706913	0.000854709	0.00809395	9.16735e-05		6.8678	0.000303587	0.000481774	0.000376503	0.00039654	0.00802444	3.7355e-05
	6.89202	0.00685596	0.00103591	0.00690929	0.000614799	0.00799013	7.53202e-05		6.89202	0.000107087	0.000362449	0.000368152	0.000222982	0.00792647	4.12444e-05
	6.90411	0.00676469	0.00149164	0.00716321	0.000641095	0.00804479	0.000103569		6.90411	0.000222413	0.000481067	0.000499879	0.000273899	0.00795874	4.71614e-05
	6.9282	0.00718431	0.00105346	0.00776304	0.00082262	0.00824062	0.000115307		6.9282	0.000849703	0.000692775	0.000801521	0.000464344	0.00813307	7.78458e-05
	6.94022	0.00677474	0.00105367	0.00694452	0.000501953	0.00789253	9.8691e-05		6.94022	0.000119584	0.000350094	0.000390547	0.000293733	0.00782245	4.61274e-05
	6.95222	0.00683271	0.00119463	0.00737485	0.000794174	0.00810842	0.000112982		6.95222	0.000453479	0.000324502	0.000606434	0.000100889	0.00800772	5.91897e-05
	6.96419	0.00658311	0.00152239	0.00735858	0.00151105	0.0078479	0.00013781		6.96419	0.000192123	0.000593518	0.000530018	0.000401041	0.00774701	6.79825e-05
	6.97615	0.00665473	0.00131042	0.00788159	0.001409	0.0080775	0.000134031		6.97615	0.000690984	0.000271174	0.000817581	0.000349707	0.00796784	8.0441e-05
	6.98809	0.0067881	0.00106611	0.00700666	0.000754387	0.00802726	9.81587e-05		6.98809	0.000241491	0.000210732	0.000503718	0.000155654	0.00794502	4.93928e-05
	7	0.0065002	0.00176155	0.00727688	0.00111034	0.00786063	0.00011543		7	0.000137306	0.000359779	0.000480481	0.000320807	0.00776691	5.60661e-05
	7.02377	0.00692101	0.00130575	0.00719329	0.000740788	0.00805795	0.000110752		7.02377	0.000300139	0.000379602	0.000624628	0.000304681	0.00796423	5.69962e-05
	7.03562	0.00679209	0.00137942	0.00740433	0.000792555	0.00800545	0.000116383		7.03562	0.000398919	0.00037944	0.000524232	0.000176146	0.00790361	5.44903e-05
	7.04746	0.00667003	0.00174993	0.00738798	0.00110453	0.00811221	0.000134943		7.04746	0.000396999	0.000452217	0.00055387	0.000322667	0.0080016	7.20939e-05
	7.05927	0.00661756	0.00148544	0.00712404	0.000611901	0.00788278	9.72325e-05		7.05927	1.48721e-05	0.000321725	0.000386126	0.000287057	0.00780059	4.59129e-05
	7.07107	0.00658388	0.00156479	0.00747065	0.00127763	0.00787928	0.000147006		7.07107	0.000356866	0.000336339	0.000465351	0.000399976	0.00776084	7.00958e-05
	7.08284	0.00682582	0.000989661	0.00678082	0.000649748	0.00793044	7.89205e-05		7.08284	7.14892e-05	0.000337714	0.000335095	0.000157025	0.0078601	4.51965e-05
	7.0946	0.0068597	0.00129731	0.00645304	0.00104647	0.00772831	7.59208e-05		7.0946	-0.000285136	0.000477123	0.000110346	0.000431615	0.00767278	6.0285e-05
	7.11805	0.00622012	0.00216034	0.00743187	0.00184058	0.00774388	0.000127766		7.11805	0.000144036	0.000442399	0.000246486	0.000641557	0.00764402	7.59891e-05
	7.12975	0.00656291	0.00140254	0.00710874	0.00077939	0.00790951	0.000108974		7.12975	8.11376e-05	0.000179342	0.000456216	0.000211	0.00781277	5.43685e-05
	7.14143	0.00676647	0.000914441	0.00696903	0.000544976	0.00788718	9.60355e-05		7.14143	0.000159011	0.00030512	0.000343299	0.000194259	0.00780101	4.38932e-05
	7.15309	0.00663633	0.00154334	0.00747189	0.00151465	0.00804853	0.000175599		7.15309	0.000570525	0.000434761	0.000613073	0.000425527	0.00790377	9.09996e-05
	7.16473	0.00701834	0.00114814	0.00647948	0.00112045	0.00783233	7.21428e-05		7.16473	-0.000156858	0.000501532	0.00018525	0.000404836	0.00778168	4.77251e-05
	7.17635	0.00695532	0.00135335	0.00681732	0.000942329	0.00794609	9.73846e-05		7.17635	4.93283e-05	0.000387223	0.000488834	0.000449123	0.00787637	4.94568e-05
	7.18795	0.00666381	0.00169351	0.00726459	0.00110581	0.00799064	0.000133006		7.18795	0.000131349	0.000462253	0.00047132	0.000445022	0.00788136	6.46145e-05
	7.2111	0.00634553	0.00175291	0.00717959	0.00115203	0.00779769	0.000130582		7.2111	7.27388e-05	0.000372548	0.000400593	0.000292668	0.00769281	6.72884e-05
	7.22265	0.00653565	0.00163169	0.00709804	0.00111812	0.00773811	0.000116425		7.22265	-8.24044e-05	0.00041581	0.00042896	0.000327327	0.00764341	6.35881e-05
	7.23418	0.00670811	0.00118044	0.00693166	0.000586629	0.00778215	9.74017e-05		7.23418	-0.000119169	0.000266107	0.000385369	0.000217463	0.00769977	5.22768e-05
	7.24569	0.00641865	0.00153865	0.00709464	0.00106843	0.00781427	0.000120643		7.24569	8.25336e-05	0.000289466	0.000320096	0.000279831	0.00770966	6.38082e-05
	7.26865	0.00645908	0.0018468	0.00799224	0.00201101	0.00787507	0.000163145		7.26865	0.000477066	0.000448553	0.000617161	0.000334365	0.00774057	8.33684e-05
	7.28011	0.0065742	0.00141968	0.00706704	0.00105177	0.00770633	0.00013267		7.28011	-3.06751e-05	0.000454384	0.000441908	0.000331626	0.00760448	7.0174e-05
	7.30297	0.00685094	0.00144548	0.00739578	0.00182481	0.00819279	0.000169212		7.30297	0.000639521	0.00058811	0.000739081	0.00042754	0.00805669	9.09647e-05
	7.31437	0.00662482	0.00121669	0.00719608	0.000732785	0.00782757	0.000117397		7.31437	0.000156399	0.000183372	0.00041545	0.000237051	0.0077219	5.55191e-05
	7.32575	0.00628061	0.00172874	0.00752903	0.00150736	0.00778381	0.000144827		7.32575	0.000197547	0.000270095	0.00040224	0.000379887	0.00766674	7.5742e-05
	7.33712	0.00708447	0.00158558	0.00634133	0.00117593	0.00765788	8.50971e-05		7.33712	-0.000444627	0.000522976	0.00016215	0.000590266	0.00760203	6.51496e-05
	7.34847	0.00679261	0.00109188	0.00666761	0.000738712	0.00778471	9.27339e-05		7.34847	-6.70993e-05	0.00012418	0.000332275	0.000209624	0.00770533	5.32998e-05
	7.3598	0.00691317	0.00122744	0.00656181	0.000736619	0.00770236	9.19763e-05		7.3598	-0.000315141	0.000336078	0.000289268	0.000388856	0.00762406	5.47634e-05
	7.37111	0.00650818	0.00145591	0.00700598	0.00100271	0.00771001	0.000127354		7.37111	-1.80736e-06	0.000246846	0.000367379	0.000286211	0.00760653	6.92636e-05
	7.39369	0.00685135	0.00217355	0.00734271	0.00142303	0.00807867	0.000147604		7.39369	5.03177e-05	0.00139029	0.000408336	0.00073149	0.00798245	6.59646e-05
	7.40495	0.00652673	0.00118731	0.00700509	0.000880493	0.00771657	0.000119075		7.40495	5.24932e-05	0.000260464	0.000279511	0.000291276	0.00761331	6.42046e-05
	7.4162	0.00676608	0.00204119	0.00733906	0.00130592	0.0080588	0.000135539		7.4162	-4.81331e-05	0.00109857	0.000454054	0.000696775	0.00795938	6.2392e-05
	7.42743	0.0067522	0.00130568	0.00648487	0.000956749	0.0076875	8.94739e-05		7.42743	-0.000415552	0.000382354	0.000326976	0.000396793	0.00761517	5.88175e-05
	7.43864	0.00652397	0.00146645	0.00650847	0.0010568	0.00762056	9.78906e-05		7.43864	-0.000410521	0.000373688	0.000309919	0.000335225	0.00754603	6.63729e-05
	7.44983	0.00661923	0.00122322	0.00657124	0.000857509	0.00757327	0.000107875		7.44983	-0.000263963	0.000457708	0.000210068	0.000225615	0.00749903	6.97507e-05
	7.46101	0.00625589	0.00177143	0.00738002	0.00143596	0.00780192	0.000168599		7.46101	0.000275217	0.000367031	0.000395007	0.000352605	0.00767296	8.96492e-05
	7.48331	0.006583	0.00184797	0.00730673	0.00114925	0.00800503	0.000125458		7.48331	1.15857e-05	0.000614266	0.000451052	0.000526725	0.00789499	6.31206e-05
	7.49444	0.00672602	0.000985636	0.00647922	0.00091115	0.00766645	0.000107801		7.49444	-0.000180904	0.000365994	0.000252616	0.000243357	0.00756916	6.12505e-05
	7.50555	0.00662502	0.0014434	0.00707135	0.00105447	0.00770559	0.000120392		7.50555	-6.15252e-05	0.000186953	0.000365367	0.000308074	0.0076044	6.83585e-05
	7.51665	0.00657857	0.00154018	0.00694838	0.00126204	0.00754586	0.000130717		7.51665	-0.000196624	0.000424178	0.000336554	0.000370875	0.00744967	7.80082e-05
	7.52773	0.00634026	0.00271075	0.00848437	0.00315902	0.00769449	0.000232821		7.52773	0.00050557	0.00122133	0.00077531	0.000891497	0.00752409	0.000135849
	7.53879	0.00658267	0.00144825	0.00718429	0.000934266	0.0077238	0.000133992		7.53879	6.47257e-06	0.000328215	0.000465718	0.000271184	0.00761657	7.42518e-05
	7.54983	0.00665043	0.00134339	0.00687804	0.000790206	0.0075919	0.000112064		7.54983	-0.000181541	0.00037829	0.00031646	0.000329367	0.00750037	6.68193e-05
	7.57188	0.00666548	0.00157649	0.00736168	0.00131391	0.00755703	0.00015427		7.57188	0.000176573	0.000574159	0.000415433	0.000511712	0.00744307	8.4715e-05
	7.58288	0.00672793	0.00128065	0.00648338	0.000905633	0.00764927	8.87543e-05		7.58288	-0.000510466	0.000387346	0.000340226	0.000393096	0.0075765	6.31297e-05
	7.59386	0.00690818	0.00111154	0.00660114	0.000529568	0.00761265	0.000111368		7.59386	-0.000106745	0.000402679	0.000294543	0.000387352	0.00751102	6.408e-05
	7.60482	0.00624582	0.00224965	0.00791404	0.002371	0.007696	0.000209788		7.60482	0.000488174	0.000531672	0.000546167	0.000696842	0.00753802	0.000119638
	7.62671	0.00634232	0.00183724	0.00718352	0.00166256	0.00753941	0.000143811		7.62671	0.000116611	0.000400966	0.000213074	0.000489537	0.00743076	9.09781e-05
	7.63763	0.00664791	0.0011553	0.0067074	0.000726562	0.00758352	0.000124064		7.63763	-0.000152743	0.000410504	0.000342204	0.000234805	0.0074881	7.31638e-05
	7.65942	0.00704631	0.00181948	0.0057402	0.00144603	0.00738752	0.000138008		7.65942	-0.000570986	0.000477058	0.000153562	0.000504577	0.00732335	9.50732e-05
	7.67029	0.00662304	0.00133484	0.00662912	0.000972676	0.00761098	0.000100566		7.67029	-0.000338734	0.000318855	0.000309185	0.000280119	0.00752865	6.93513e-05
	7.68115	0.00679841	0.0012217	0.0064197	0.000843476	0.00748989	0.000108268		7.68115	-0.000335216	0.000332523	0.000206888	0.000185281	0.00741306	7.34277e-05
	7.69199	0.0065115	0.0014583	0.00696707	0.00108412	0.00762211	0.000131702		7.69199	-0.000121315	0.00035471	0.000439049	0.000327109	0.00752527	8.08153e-05
	7.70281	0.00638508	0.00159249	0.00730894	0.00140979	0.00766597	0.000144973		7.70281	8.04778e-05	0.000177019	0.000327341	0.000387942	0.00755167	8.15604e-05
	7.71362	0.00637827	0.00173554	0.00751578	0.00176394	0.00787264	0.000200255		7.71362	0.000452968	0.000428457	0.00050473	0.00052366	0.00770457	0.000109604
	7.72442	0.00738771	0.00161434	0.00562991	0.00157048	0.00740544	0.000115614		7.72442	-0.000678669	0.00056975	0.000368718	0.000536816	0.00737195	9.03475e-05
	7.74597	0.00684797	0.00103407	0.00634704	0.000724214	0.00755347	0.000109922		7.74597	-0.000324443	0.000388561	0.000354568	0.000255105	0.00747133	7.45374e-05
	7.75672	0.00653056	0.00150827	0.00656372	0.00120699	0.00756529	0.000106291		7.75672	-0.000476852	0.000535874	0.000368705	0.000476653	0.00748395	7.5094e-05
	7.76745	0.0064416	0.001289	0.00671101	0.00110663	0.00755222	0.000117415		7.76745	-0.00016674	0.000408083	0.000222208	0.00024224	0.00745547	7.57273e-05
	7.77817	0.00687449	0.00141318	0.00663489	0.000965823	0.00741557	0.00011851		7.77817	-3.58167e-05	0.000562824	4.51766e-06	0.00042651	0.00732311	8.51434e-05
	7.79957	0.00687777	0.00122704	0.00688527	0.000789491	0.00748337	0.000129152		7.79957	2.7465e-06	0.000470927	0.000252757	0.000374586	0.00737786	7.85997e-05
	7.81025	0.00652707	0.00200721	0.00754764	0.00176901	0.00750067	0.000162891		7.81025	8.6569e-05	0.000594044	0.000499678	0.00050479	0.00737686	0.000101909
	7.84219	0.00685396	0.00158986	0.0071633	0.00112643	0.00750341	0.000147562		7.84219	4.97399e-05	0.000549227	0.000505898	0.000443433	0.00739011	8.58712e-05
	7.85281	0.00673841	0.00166926	0.00717174	0.00129158	0.00754998	0.000153408		7.85281	-7.14304e-05	0.000590527	0.000641982	0.000477098	0.00743736	9.75495e-05
	7.86342	0.00691383	0.00106794	0.00619472	0.000938372	0.00741541	0.000114216		7.86342	-0.000338586	0.000589492	0.000210036	0.000255498	0.00733819	8.21632e-05
	7.87401	0.00624578	0.001751	0.00707327	0.00132511	0.00771157	0.000151522		7.87401	1.93671e-05	0.000547552	0.000299505	0.000417665	0.00759647	8.39112e-05
	7.88458	0.00629817	0.00199911	0.00760038	0.00176748	0.00762179	0.000181567		7.88458	0.000183506	0.000440552	0.000575844	0.000556915	0.00748938	0.000108549
	7.89515	0.00653862	0.00161239	0.0070227	0.00143767	0.00746743	0.000136858		7.89515	1.55838e-06	0.000341432	0.00033545	0.000327462	0.00736809	9.39706e-05
	7.91623	0.00648212	0.00155365	0.00662582	0.00140396	0.00740699	0.000117966		7.91623	-0.000144501	0.000562026	1.65144e-05	0.000405826	0.00731623	9.38258e-05
	7.92675	0.00718717	0.00138225	0.00585574	0.00109925	0.00736181	0.000131995		7.92675	-0.000456558	0.000576341	0.000308313	0.000403723	0.00728859	9.24028e-05
	7.93725	0.00611385	0.00224999	0.00775249	0.00212032	0.00760997	0.000213222		7.93725	0.000502573	0.000419251	0.000481594	0.000683896	0.00746182	0.000129538
	7.96869	0.00655351	0.00132719	0.00684955	0.00119697	0.00748047	0.00013629		7.96869	-4.1717e-06	0.000436889	0.000294368	0.000246444	0.00737741	8.85408e-05
	7.97914	0.00644629	0.00149372	0.00663554	0.00131326	0.00745669	0.000114998		7.97914	-0.000332464	0.000638102	0.000203383	0.000359332	0.00737075	8.74559e-05
	8	0.00716094	0.00177531	0.00638389	0.000977425	0.00756206	0.000100934		8	-0.000639069	0.000694461	0.000604567	0.000792294	0.0075076	8.42913e-05
	8.01041	0.0061363	0.00204281	0.00738837	0.0019062	0.00748917	0.000181217		8.01041	0.000364453	0.00058672	0.000245606	0.00049607	0.00737602	0.000118215
	8.02081	0.00716587	0.00116309	0.00638433	0.000603255	0.00747131	0.00011288		8.02081	-0.000260567	0.00049474	0.000353384	0.00049154	0.00738116	7.88867e-05
	8.03119	0.00709198	0.00115976	0.00593395	0.00105839	0.00734114	0.000122496		8.03119	-0.000463632	0.000411306	0.000296369	0.000389349	0.0072768	9.88451e-05
	8.04156	0.00825781	0.00265057	0.00532736	0.00193294	0.00721617	0.00017687		8.04156	-0.000479515	0.00073457	0.000180993	0.000907363	0.0071429	0.000131202
	8.05191	0.00695828	0.00105709	0.00606576	0.00105502	0.00735223	0.000117266		8.05191	-0.00049787	0.000531378	0.000276512	0.000314241	0.00728141	9.86944e-05
	8.06226	0.00730011	0.00105948	0.00616344	0.000831487	0.00730265	0.00012884		8.06226	-0.000115692	0.000559799	0.000113965	0.000364489	0.00722085	9.36885e-05
	8.0829	0.00652134	0.00195766	0.00757645	0.0014696	0.0075403	0.000156596		8.0829	-1.27976e-05	0.000643142	0.000563984	0.000465288	0.0074196	0.00010208
	8.09321	0.00628308	0.00263604	0.00825684	0.0022327	0.00754882	0.000213442		8.09321	0.000589257	0.000630982	0.000553033	0.000708039	0.00739844	0.000142864
	8.1035	0.00684179	0.00126131	0.00684939	0.00109441	0.00737517	0.00014282		8.1035	3.43966e-05	0.000530108	0.00031741	0.000346122	0.00726585	9.33877e-05
	8.11377	0.0065359	0.00209699	0.00762042	0.0017428	0.00745851	0.000172437		8.11377	0.00016758	0.000680099	0.000561178	0.000508988	0.00732613	0.000113723
	8.12404	0.00719628	0.00165151	0.00697469	0.00102403	0.00735723	0.000160348		8.12404	0.000205309	0.00056273	0.000535282	0.000435661	0.00725156	0.00010088
	8.14453	0.00696501	0.00156965	0.00693775	0.00107146	0.00737443	0.000158685		8.14453	0.000143508	0.00057165	0.000513284	0.000396985	0.00726202	0.000100103
	8.16497	0.0062101	0.00303748	0.00833611	0.00289274	0.00763145	0.000251951		8.16497	0.000536982	0.00119921	0.000759145	0.0010774	0.00743812	0.000159577
	8.17517	0.00657133	0.00175738	0.00715273	0.00163156	0.00743123	0.000151051		8.17517	0.000200273	0.000332038	0.000343209	0.000457096	0.00731863	0.000106993
	8.18535	0.00660593	0.00108833	0.00638592	0.00108959	0.00738141	0.000121731		8.18535	-0.000181682	0.000670035	0.0001754	0.00035128	0.00728924	9.23392e-05
	8.19553	0.00623949	0.00294044	0.00791195	0.0023781	0.00745525	0.000223317		8.19553	0.000781645	0.000591388	0.000498481	0.000842599	0.00731916	0.000154153
	8.20569	0.00671614	0.00117448	0.00658208	0.00100664	0.00736684	0.000140099		8.20569	-4.80583e-05	0.00062281	0.000337864	0.000341528	0.00725769	9.54379e-05
	8.21584	0.00657773	0.00131517	0.00660021	0.00126512	0.00739422	0.000112926		8.21584	-0.000254791	0.000590188	0.000176587	0.000253206	0.00730964	9.59292e-05
	8.22598	0.00769829	0.00163787	0.00546986	0.00123907	0.00727778	0.000138928		8.22598	-0.000696746	0.000610834	0.000507587	0.000718569	0.00722915	0.000110264
	8.24621	0.00649772	0.00269606	0.00751268	0.00236677	0.00737695	0.000194225		8.24621	0.000713697	0.0007246	0.000257103	0.000765782	0.00726081	0.000140798
	8.25631	0.00743877	0.00098885	0.00638617	0.000602054	0.00733767	0.000143111		8.25631	3.01229e-05	0.000531772	0.000309395	0.000525359	0.00723031	9.46849e-05
	8.2664	0.00676774	0.00125203	0.00668463	0.00125757	0.00734607	0.000135046		8.2664	2.28896e-05	0.00060262	0.000306937	0.000192739	0.00725228	0.000101555
	8.27647	0.00869146	0.00280293	0.00509481	0.00195962	0.00714986	0.000196504		8.27647	-0.000455593	0.000823814	0.000197681	0.000976925	0.00707828	0.000150138
	8.29659	0.00774298	0.00157393	0.00572804	0.00104261	0.0072543	0.000145193		8.29659	-0.000391781	0.000619708	0.00022763	0.000551866	0.00717231	0.000116871
	8.30662	0.00657259	0.00124093	0.00632923	0.00134577	0.00726466	0.000133345		8.30662	1.42725e-05	0.00078338	-3.78592e-06	0.000650553	0.00717302	0.0001176
	8.32666	0.00610244	0.00207366	0.00734087	0.00188998	0.00747126	0.000187405		8.32666	0.000399689	0.000634674	0.000255048	0.000478732	0.00735878	0.000123787
	8.33667	0.00768502	0.00116199	0.00580653	0.000962514	0.00721982	0.000147788		8.33667	-0.000137065	0.000586187	0.000221112	0.00043267	0.00714472	0.000109939
	8.34666	0.00684251	0.00106182	0.00627468	0.00103846	0.00730869	0.000116632		8.34666	-0.000284302	0.000691651	0.000212262	0.000357171	0.0072278	0.000109023
	8.35663	0.00682826	0.00115559	0.0065948	0.00137352	0.00728907	0.000136661		8.35663	0.000163584	0.00064783	0.000116915	0.000341876	0.00719171	0.000105712
	8.3666	0.00731126	0.00120617	0.00592244	0.000995554	0.00735758	0.000114872		8.3666	-0.000745194	0.000597458	0.000535596	0.00058813	0.00729733	0.000102197
	8.37655	0.00730152	0.00153662	0.00697388	0.00113743	0.00728762	0.000165048		8.37655	0.000147695	0.000780856	0.000482634	0.000371551	0.00716458	0.000103886
	8.3865	0.00653098	0.00438317	0.00954737	0.00323708	0.00747602	0.000276976		8.3865	0.00121889	0.00126548	0.000871371	0.00120253	0.0072798	0.000208957
	8.41625	0.00679417	0.00225765	0.00765267	0.00164867	0.00739229	0.000189357		8.41625	0.000529437	0.000589857	0.000544019	0.000600847	0.0072606	0.000132223
	8.42615	0.00653489	0.00211241	0.00763306	0.00171691	0.00744501	0.000176404		8.42615	0.000196914	0.000740695	0.000583617	0.000517856	0.00730919	0.000118289
	8.43603	0.00778113	0.00160832	0.00547474	0.00124315	0.00721248	0.000156665		8.43603	-0.000545144	0.000838798	0.000387395	0.00063501	0.00714556	0.000125928
	8.44591	0.00647376	0.00171604	0.00672881	0.00188727	0.00726817	0.000139332		8.44591	0.000391567	0.000919184	-6.18988e-05	0.000686005	0.0071706	0.000122421
	8.45577	0.0067003	0.00133823	0.00677466	0.00124161	0.00729832	0.000151332		8.45577	0.000200295	0.000705448	0.000313851	0.000447607	0.00718108	0.000108886
	8.46562	0.00651348	0.00244784	0.00741372	0.00195841	0.00733978	0.000175069		8.46562	0.000676922	0.000688836	0.000228345	0.000639212	0.00722072	0.00013452
	8.48528	0.00919391	0.0031517	0.00498856	0.00202455	0.00709186	0.000221962		8.48528	-0.000510757	0.000958236	0.000179548	0.0012291	0.00700382	0.000183441
	8.4951	0.00710649	0.00109751	0.00600046	0.00107501	0.00722991	0.000138929		8.4951	-0.000270426	0.000970647	0.000206724	0.000534557	0.00713983	0.000128012
	8.5049	0.00807256	0.00134643	0.00598864	0.000812934	0.00721212	0.000162222		8.5049	-2.21774e-05	0.000527259	0.000294503	0.000602298	0.00711036	0.000117702
	8.52447	0.0064291	0.00163148	0.006776	0.00143261	0.00735006	0.000124285		8.52447	-8.34623e-06	0.00081959	2.81834e-05	0.000422335	0.00725895	0.000106196
	8.53424	0.00701046	0.00166434	0.00681914	0.00155034	0.00731184	0.000155607		8.53424	0.000337435	0.000517905	0.00038296	0.000489843	0.00721583	0.000117789
	8.544	0.00860484	0.00262567	0.00517092	0.0016181	0.00711285	0.000204215		8.544	-0.000379362	0.000688961	0.000236856	0.000859412	0.00703313	0.000165398
	8.56349	0.00843354	0.00242067	0.0052308	0.0015554	0.00712094	0.000198486		8.56349	-0.000381662	0.000721261	0.000241883	0.000780858	0.00704038	0.000161423
	8.57321	0.00669702	0.00119458	0.0065914	0.00130695	0.00729274	0.000133164		8.57321	0.000107585	0.000674859	0.000215114	0.000282482	0.00719725	0.000110613
	8.59263	0.00657362	0.00135808	0.00644143	0.00136413	0.00723308	0.000131999		8.59263	0.000169978	0.000932497	3.01725e-06	0.000688816	0.00713662	0.000128201
	8.62168	0.00753323	0.000910347	0.00595771	0.00111726	0.00718858	0.000152389		8.62168	-1.52501e-05	0.000653597	0.00021394	0.000402623	0.00710066	0.000122656
	8.65063	0.00667531	0.00133955	0.00646694	0.00111792	0.00728717	0.000116706		8.65063	-0.000112097	0.000898716	0.000118558	0.000458963	0.00719571	0.000116123
	8.66025	0.00722383	0.00103523	0.00669136	0.00101333	0.00725047	0.000149792		8.66025	0.000135539	0.000707231	0.000288575	0.00026918	0.00714129	0.000112553
	8.66987	0.00665348	0.00496474	0.00997455	0.00306234	0.0074405	0.000284555		8.66987	0.00151378	0.00147242	0.000841313	0.00125399	0.00723517	0.000232773
	8.67948	0.00652714	0.00466389	0.00994763	0.00346413	0.00747547	0.000291837		8.67948	0.00129608	0.00157427	0.000931265	0.00128883	0.00726735	0.000223827
	8.68907	0.00653999	0.00454635	0.00960712	0.00312948	0.00746361	0.000281579		8.68907	0.00130813	0.00134232	0.000866581	0.00122882	0.00726394	0.000217246
	8.69866	0.00676287	0.00458502	0.00905205	0.00240714	0.00740677	0.000260608		8.69866	0.00144441	0.000997504	0.000685375	0.00117496	0.00722482	0.000212074
	8.7178	0.00699869	0.00146901	0.00698615	0.00120423	0.0072732	0.000161645		8.7178	0.000379305	0.000677243	0.000401292	0.000379094	0.00715355	0.000118045
	8.72735	0.0074311	0.000846395	0.00616364	0.00123681	0.00717306	0.000152067		8.72735	0.000216067	0.000464376	3.22011e-05	0.000539496	0.00707462	0.000132387
	8.73689	0.0072689	0.00118946	0.00586485	0.001191	0.00718497	0.000152964		8.73689	-0.000208845	0.000960467	0.00019722	0.000598103	0.00709539	0.000139898
	8.74643	0.007973	0.001324	0.00660881	0.000859059	0.00720757	0.000167746		8.74643	0.00041732	0.000354681	0.000324174	0.000505848	0.00708711	0.000117577
	8.76546	0.00775556	0.000904909	0.00623456	0.000898967	0.00719546	0.000156949		8.76546	0.000180483	0.000309464	0.000206503	0.000444347	0.00709438	0.000121982
	8.79394	0.00715342	0.00115718	0.00604308	0.00103415	0.00722077	0.000136544		8.79394	-0.000236189	0.00103488	0.000218596	0.000537937	0.00712754	0.000132575
	8.80341	0.00851118	0.00253895	0.00532372	0.00161581	0.00708362	0.000208574		8.80341	-0.000361532	0.000791337	0.000143234	0.000865821	0.00698942	0.000185632
	8.81287	0.00689108	0.00326976	0.00745066	0.00236087	0.00729753	0.000211736		8.81287	0.00103804	0.000784994	0.00030196	0.000986581	0.00717474	0.000163187
	8.82232	0.00870879	0.00283733	0.00506533	0.00173636	0.00708584	0.000214839		8.82232	-0.000373626	0.0007059	0.000330954	0.000947387	0.00701865	0.000174252
	8.83176	0.00668714	0.00300471	0.00745945	0.00233175	0.00732047	0.000207783		8.83176	0.000912771	0.000722252	0.00030167	0.000873565	0.00720148	0.00015627
	8.84119	0.00846735	0.00244931	0.00523711	0.00164981	0.00709809	0.000203655		8.84119	-0.000396976	0.000792637	0.00023535	0.000789466	0.00701626	0.000173244
	8.85061	0.0065348	0.00138842	0.00643476	0.00165175	0.0071839	0.00015052		8.85061	0.000373446	0.00120728	-2.27808e-05	0.000841932	0.00708196	0.000142849
	8.87881	0.00765197	0.00193949	0.00567858	0.00161077	0.00710596	0.000188973		8.87881	-0.000251953	0.00117873	6.21669e-05	0.00090857	0.00700598	0.000173043
	8.88819	0.00660369	0.00145341	0.00647735	0.00135233	0.00722325	0.000131278		8.88819	0.000233636	0.00100767	1.00671e-05	0.000691531	0.00712426	0.000132436
	8.89757	0.00741438	0.000924361	0.00610054	0.00131012	0.0071617	0.00015619		8.89757	0.000103531	0.000905931	0.000106266	0.000461563	0.00705804	0.000137254
	8.91628	0.00750756	0.000766196	0.00613061	0.00120358	0.00720154	0.000149072		8.91628	0.000132078	0.000595789	0.000256572	0.000420163	0.00711548	0.000118121
	8.95358	0.00741899	0.00148579	0.00724009	0.00104688	0.00724926	0.000170872		8.95358	0.000289545	0.000962751	0.000459203	0.000339522	0.00711713	0.00011915
	8.96289	0.00798504	0.001701	0.00758903	0.00106454	0.00722412	0.000192716		8.96289	0.000597288	0.000965837	0.00047915	0.000662675	0.007072	0.000126372
	8.98146	0.00917447	0.00347191	0.00504672	0.00195949	0.00702212	0.000242894		8.98146	-0.000348325	0.00105687	0.000138647	0.00121213	0.00693458	0.000223965
	8.99074	0.00688565	0.00153738	0.00709387	0.00136882	0.00722094	0.000163739		8.99074	0.000539086	0.00102067	0.000221833	0.000532968	0.0070902	0.000133859
	9	0.00824567	0.00184239	0.00568653	0.00132937	0.00708861	0.000188849		9	-4.55857e-06	0.00052734	6.3523e-05	0.000705609	0.00699096	0.00017392
	9.0185	0.006546	0.00175139	0.00676	0.00203731	0.00722257	0.000152809		9.0185	0.000620772	0.00116877	-2.30364e-05	0.000702201	0.00711806	0.000136862
	9.02774	0.00703274	0.00140859	0.00606838	0.0012634	0.00716804	0.000152062		9.02774	3.05451e-06	0.00112267	8.36433e-05	0.000750774	0.00706528	0.000150274
	9.03696	0.00825981	0.00144972	0.00610318	0.00111048	0.00714373	0.000179018		9.03696	0.000205165	0.000482994	0.000309287	0.000644083	0.00704072	0.000137209
	9.05539	0.00855038	0.00283028	0.00539746	0.00177143	0.00705532	0.000214218		9.05539	-0.000405139	0.00106981	4.79561e-06	0.000983743	0.00695609	0.000204619
	9.07377	0.00853808	0.00270846	0.00532432	0.00181494	0.00706408	0.00021257		9.07377	-0.000415141	0.000994736	5.63208e-05	0.000885025	0.00696836	0.000197886
	9.10128	0.00698264	0.0034077	0.00743187	0.00234338	0.00728588	0.000215407		9.10128	0.0010943	0.000856199	0.000305206	0.00105398	0.00716077	0.00016789
	9.11043	0.00871013	0.00290059	0.00509338	0.00180087	0.00707879	0.000217487		9.11043	-0.00038548	0.000713936	0.000377797	0.00100236	0.00701125	0.000179042
	9.11958	0.00656906	0.00146387	0.00645964	0.00185564	0.00715534	0.000165694		9.11958	0.000497896	0.00161175	-6.53088e-06	0.000923814	0.00704678	0.000155289
	9.12871	0.00849419	0.00250035	0.00524871	0.0017386	0.00709111	0.000205325		9.12871	-0.000420915	0.00085247	0.000238994	0.000823282	0.00700792	0.000178071
	9.13783	0.00657247	0.00145271	0.0064528	0.00167092	0.00717499	0.000153141		9.13783	0.000431243	0.00133064	-1.68724e-05	0.000850721	0.00706953	0.000147412
	9.14695	0.00767476	0.00232015	0.00570845	0.00171381	0.00708529	0.000192393		9.14695	-0.000312962	0.00141526	-4.60187e-05	0.00101674	0.00698133	0.000184583
	9.18332	0.00731454	0.000975839	0.00632227	0.00146537	0.00717425	0.000155373		9.18332	0.000315402	0.000951613	0.000102477	0.000424199	0.00706607	0.000134273
	9.19239	0.0092759	0.003901	0.00518166	0.00229904	0.00698866	0.000262193		9.19239	-0.000296173	0.00164324	0.00012371	0.00143985	0.00689095	0.000260586
	9.2105	0.00921515	0.00382606	0.00518555	0.00225542	0.0069921	0.000254254		9.2105	-0.000262936	0.00137852	8.60703e-05	0.00130367	0.00690009	0.000253087
	9.2376	0.00658537	0.00561809	0.0107711	0.00331268	0.00743015	0.000301209		9.2376	0.00170514	0.00202479	0.000894929	0.00141776	0.00721151	0.000262891
	9.24662	0.0088286	0.00276489	0.00576312	0.00173128	0.00705115	0.000220941		9.24662	-8.31412e-05	0.000970003	0.000150239	0.000954597	0.00694997	0.000202649
	9.25563	0.00690476	0.00184866	0.00612659	0.00169386	0.00710819	0.000180517		9.25563	6.27945e-05	0.00174184	-5.93977e-05	0.00107799	0.00700124	0.000172231
	9.26463	0.00903298	0.0034915	0.00519299	0.0021526	0.00701381	0.000237687		9.26463	-0.000358458	0.001044	4.19717e-05	0.00107489	0.00692519	0.000232384
	9.27362	0.00694113	0.00130468	0.0067182	0.00137058	0.0071781	0.000161946		9.27362	0.000373917	0.00123598	0.000119846	0.000658197	0.00705477	0.000143032
	9.2826	0.00665017	0.00189231	0.00673408	0.00228445	0.00719237	0.00016959		9.2826	0.000791567	0.00152286	4.19207e-05	0.000814887	0.00708002	0.000149442
	9.31844	0.00855545	0.00260778	0.00554231	0.00177532	0.00706106	0.000207236		9.31844	-0.000314049	0.00102891	3.39681e-05	0.000885724	0.00696285	0.000195366
	9.35414	0.00855781	0.00280324	0.00532174	0.00193045	0.00705811	0.00021374		9.35414	-0.000455475	0.00110087	2.20976e-05	0.000904636	0.00696127	0.00020246
	9.38083	0.00708714	0.00357325	0.00741212	0.0023313	0.0072752	0.000219124		9.38083	0.00115746	0.000984378	0.000313436	0.0011373	0.00714729	0.000172807
	9.39858	0.00660369	0.00151582	0.00647982	0.00192454	0.00714655	0.000171326		9.39858	0.000553295	0.00181074	1.02187e-05	0.000952352	0.0070346	0.000160514
	9.40744	0.00763402	0.00277987	0.00578168	0.00184314	0.00706544	0.000197648		9.40744	-0.000401781	0.00178482	-0.000167165	0.00116601	0.0069592	0.000195923
	9.42514	0.00768898	0.00248115	0.00571411	0.00175205	0.00707931	0.000193188		9.42514	-0.000352774	0.00152117	-9.18397e-05	0.00104481	0.00697293	0.000188862
	9.43398	0.00923409	0.00427542	0.00537233	0.00289934	0.00696363	0.000271012		9.43398	-2.03377e-05	0.0018529	0.000108493	0.00144598	0.0068712	0.000286094
	9.45163	0.00926547	0.00416467	0.00534839	0.00273645	0.00696897	0.000259667		9.45163	-8.42946e-05	0.00158449	1.37705e-05	0.00133592	0.00687905	0.000277435
	9.46044	0.00693954	0.00272073	0.00697626	0.00252319	0.00722618	0.000194039		9.46044	0.000983933	0.00132508	0.000163656	0.00095464	0.00710973	0.000156861
	9.46925	0.00915082	0.00407052	0.00526384	0.00268246	0.00697294	0.000257264		9.46925	-0.000119152	0.0014644	8.24315e-05	0.00127613	0.00688979	0.000268474
	9.50438	0.00915775	0.00383741	0.00531177	0.00240019	0.00699298	0.000238007		9.50438	-0.000366655	0.00134495	-0.000160741	0.0012007	0.00689994	0.000254502
	9.5219	0.00903913	0.00377071	0.00514694	0.00240563	0.00699545	0.000249803		9.5219	-0.00024536	0.00115568	0.000221824	0.00117586	0.00691919	0.000243292
	9.53065	0.00691787	0.00194834	0.00615059	0.00174718	0.00710043	0.000184511		9.53065	7.70112e-05	0.00194736	-7.28885e-05	0.00110738	0.00699124	0.00017701
	9.53939	0.009028	0.00357798	0.00519809	0.00230302	0.00700778	0.000238874		9.53939	-0.000371685	0.00113434	3.69074e-05	0.00108783	0.00692081	0.000237322
	9.55685	0.00670401	0.00199446	0.00673332	0.00238131	0.00718308	0.000176357		9.55685	0.000852516	0.0017031	8.1764e-05	0.000871607	0.00706737	0.000154765
	9.57427	0.00855568	0.00359233	0.00551411	0.00209786	0.00702498	0.000215735		9.57427	-0.000617826	0.00168359	-0.000293263	0.00123039	0.00692084	0.000230002
	9.59166	0.00857105	0.00330467	0.00543166	0.0020557	0.00703407	0.000216381		9.59166	-0.000558291	0.00146352	-0.000192322	0.0011196	0.00693136	0.000221479
	9.66954	0.00877926	0.00372925	0.00576601	0.00291372	0.00698012	0.000251256		9.66954	0.000378618	0.0015607	8.84851e-05	0.00126319	0.00688713	0.000273919
	9.67815	0.00761362	0.00294703	0.00581058	0.00189182	0.00705958	0.000199099		9.67815	-0.000441968	0.00195745	-0.000214832	0.00120249	0.00695186	0.000200208
	9.68676	0.00920968	0.00460367	0.00548176	0.00348675	0.00694362	0.00027408		9.68676	0.000229271	0.00192324	0.000105836	0.00143035	0.0068631	0.000303691
	9.70395	0.00933791	0.0044213	0.00540723	0.00324547	0.00695238	0.000260233		9.70395	6.83149e-05	0.00168295	-4.50025e-05	0.00137496	0.00686944	0.000293943
	9.73824	0.00913344	0.00417398	0.00528051	0.00287359	0.00696575	0.000257843		9.73824	-7.74491e-05	0.00149802	0.000100005	0.00127161	0.00688755	0.000274153
	9.75534	0.00926841	0.00412869	0.00537321	0.00268448	0.00698164	0.000234511		9.75534	-0.000391582	0.00155012	-0.000315969	0.00133915	0.00688747	0.000269966
	9.77241	0.00917579	0.00393336	0.00530731	0.00255041	0.00698817	0.000237434		9.77241	-0.000385195	0.00142365	-0.000202979	0.00123838	0.00689605	0.00025963
	9.79796	0.00691941	0.00203315	0.00618498	0.00183071	0.00709227	0.000189453		9.79796	0.00010014	0.00220089	-8.13466e-05	0.00115103	0.00698162	0.000181983
	9.84039	0.00853637	0.00375698	0.00554372	0.00216463	0.00702122	0.00021479		9.84039	-0.000674703	0.00182002	-0.000357625	0.00128402	0.00691568	0.000234847
	9.89949	0.00946096	0.00541095	0.0058102	0.00491671	0.00691882	0.000302334		9.89949	0.000754012	0.00247252	0.000126042	0.00166734	0.00683573	0.000348493
	9.91632	0.00942074	0.00514195	0.00567212	0.00448946	0.00692254	0.00028694		9.91632	0.000599879	0.00220146	8.30557e-05	0.00156237	0.00684526	0.000334312
	9.9415	0.00757625	0.0031085	0.00585311	0.00195179	0.00705362	0.000200808		9.9415	-0.000469646	0.00217208	-0.000260137	0.00124699	0.00694499	0.000204572
	9.94987	0.00944527	0.00469218	0.0054654	0.00378198	0.00693819	0.000263613		9.94987	0.000247496	0.0018066	-5.21236e-05	0.00145759	0.00686033	0.000310652
	9.96661	0.00937386	0.004521	0.00540322	0.00347088	0.00694615	0.000259482		9.96661	0.000116736	0.00170384	-6.14958e-05	0.00139304	0.00686721	0.000299868
	10.0167	0.00930937	0.00424414	0.00538321	0.00282889	0.00697847	0.000232254		10.0167	-0.000409396	0.00161813	-0.000371424	0.00140284	0.00688398	0.000275802
	10.0995	0.0085044	0.00392552	0.005589	0.00222612	0.00701788	0.000213353		10.0995	-0.000723379	0.00197839	-0.000419963	0.00134463	0.00691093	0.00023995
	10.1407	0.00963787	0.00596521	0.00591193	0.00593514	0.00690111	0.000313208		10.1407	0.0010774	0.00265874	0.000121272	0.00176143	0.00682646	0.000372004
	10.1571	0.00968542	0.00556041	0.00572443	0.00538942	0.00690745	0.000292854		10.1571	0.000869333	0.00232308	6.51503e-05	0.00167328	0.00683566	0.000354937
	10.1735	0.00946851	0.00530354	0.00568143	0.00480318	0.00691508	0.000287397		10.1735	0.000698003	0.00220934	7.90816e-05	0.00157163	0.00684362	0.000341229
	10.2062	0.0096676	0.00479466	0.00543768	0.00406359	0.00693509	0.000256676		10.2062	0.000265282	0.00179881	-0.000163168	0.00154031	0.00685703	0.000317604
	10.2713	0.00935774	0.00437181	0.00540565	0.0029764	0.00697612	0.000229326		10.2713	-0.00042148	0.00168971	-0.000426885	0.00147989	0.00688067	0.000282063
	10.3763	0.00991586	0.00663582	0.00600711	0.00715125	0.00688453	0.000329972		10.3763	0.0013969	0.00301028	0.000122306	0.00191103	0.00681415	0.000399234
	10.3923	0.00971872	0.00619052	0.00592721	0.0063435	0.00689358	0.000315991		10.3923	0.00118966	0.00271869	0.000118852	0.00178741	0.00682398	0.000380408
	10.4083	0.0098052	0.00572447	0.00571765	0.00575791	0.00690147	0.000293926		10.4083	0.000964618	0.00236034	6.38722e-05	0.00171244	0.00683294	0.000362079
	10.4563	0.00979827	0.00491049	0.00543271	0.00432824	0.0069316	0.000254556		10.4563	0.000323985	0.00183806	-0.000188835	0.00161098	0.00685426	0.000324049
	10.6066	0.0102364	0.00756225	0.00615822	0.00858361	0.0068663	0.00035566		10.6066	0.00172901	0.00369345	0.000107948	0.00214758	0.00679799	0.000434144
	10.6223	0.0100462	0.00690344	0.0060188	0.00762883	0.00687745	0.000335091		10.6223	0.00150112	0.00315579	0.00012247	0.00196665	0.00681005	0.000409049
	10.6536	0.00995808	0.00588822	0.00570546	0.00614536	0.00689626	0.000295356		10.6536	0.00106111	0.00242524	6.77729e-05	0.00176712	0.00682961	0.000369196
	10.8474	0.0103943	0.00794251	0.0061967	0.00913562	0.00685832	0.000364157		10.8474	0.00182855	0.00399263	0.000101969	0.00227355	0.00679216	0.000447384
	10.8628	0.0101997	0.00718584	0.0060281	0.00812901	0.00687061	0.000341207		10.8628	0.0015985	0.00334384	0.000125689	0.00204078	0.00680513	0.00041938
	11.083	0.0105682	0.00837235	0.00624877	0.00971342	0.00684993	0.00037399		11.083	0.00192241	0.00436083	9.73723e-05	0.00245536	0.0067856	0.000462169
	11.3137	0.0107567	0.00886962	0.00632403	0.0103197	0.00684085	0.000385285		11.3137	0.00201335	0.00481155	9.58059e-05	0.00272166	0.00677845	0.00047903
