# Supplementary material for: Electrostatics of salt-dependent reentrant phase behaviors highlights diverse roles of ATP in biomolecular condensates
Source: eLife journal article supplement (doi:10.7554/elife.100284), 2024-09-05
Supplement: app1-fig5-data1 [file elife-100284-app1-fig5-data1-v1.zip]

## Sheet: Fig.S5
			Fig. S5, Caprin1 self-correlation at [ATP-Mg]=0.0001, 0.05 and 8.0 b^{-3}
r/b	0.0001(Avg)	0.0001(Std)	0.05(Avg)	0.05(Std)	8.0(Avg)	8.0(Std)
0	0.17114	0.0173705	0.274943	0.0148785	0.147416	0.000765705
0.408248	0.133445	0.0151469	0.239041	0.0136324	0.115325	0.000614347
0.57735	0.109259	0.0137568	0.214264	0.0124129	0.0937748	0.00052551
0.707107	0.0932589	0.0126676	0.196481	0.011513	0.0789811	0.000470361
0.816497	0.0820561	0.0126145	0.182701	0.01081	0.0683076	0.000420965
0.912871	0.0743743	0.0119407	0.172485	0.0105358	0.060818	0.000401991
1	0.068811	0.0113539	0.164119	0.0102872	0.055177	0.000387566
1.1547	0.0606826	0.0113149	0.150932	0.0099049	0.0472096	0.000366125
1.22474	0.0577313	0.0105672	0.145324	0.0095703	0.0443206	0.000352505
1.29099	0.0553043	0.0109332	0.139964	0.00919592	0.0418817	0.000326599
1.35401	0.0529984	0.0103066	0.135352	0.00906481	0.0397253	0.000326242
1.41421	0.0512555	0.008978	0.131554	0.00912661	0.037827	0.000344168
1.47196	0.0492852	0.0109379	0.127444	0.00880263	0.0361546	0.000317456
1.52753	0.0473765	0.0100876	0.123563	0.00859057	0.0346646	0.000320542
1.63299	0.0459513	0.0114639	0.116548	0.00782139	0.0320503	0.000250835
1.68325	0.0441759	0.00972263	0.113527	0.00795002	0.0309647	0.000289195
1.73205	0.0431524	0.010443	0.110641	0.00776699	0.029934	0.000274785
1.77951	0.040689	0.0104066	0.107922	0.00785033	0.0290053	0.000299501
1.82574	0.0414999	0.0107385	0.105104	0.00737549	0.0281281	0.000266831
1.87083	0.0400968	0.0101492	0.102323	0.00727974	0.0273307	0.000276334
1.91485	0.037923	0.00903154	0.0997464	0.00740325	0.0266042	0.000309457
2	0.0370174	0.00947734	0.0951411	0.0071021	0.0252553	0.000289515
2.04124	0.0371272	0.0101346	0.093415	0.00710685	0.0246573	0.000252966
2.08167	0.0364866	0.0100136	0.0911795	0.00688773	0.0240998	0.000251828
2.12132	0.0368925	0.0101266	0.0889033	0.00652148	0.0235833	0.0002414
2.19848	0.0341858	0.00960346	0.0849461	0.00632494	0.0225926	0.000265678
2.23607	0.0350425	0.00987562	0.0831028	0.00616281	0.0221505	0.000242683
2.3094	0.032791	0.00853337	0.080058	0.00685209	0.0213154	0.000255004
2.34521	0.0319593	0.00879648	0.0779584	0.00625198	0.0209459	0.000252911
2.38048	0.0317165	0.00900506	0.0761422	0.00567569	0.0205893	0.000255767
2.41523	0.0315861	0.00808846	0.0747911	0.00595231	0.0202494	0.000246346
2.44949	0.0298348	0.00947108	0.07306	0.00558296	0.0199246	0.000247577
2.48328	0.0328562	0.00914091	0.0714411	0.00547588	0.0196395	0.000210712
2.51661	0.0302725	0.00882189	0.0699371	0.00534016	0.0193247	0.000233735
2.58199	0.0318873	0.00829375	0.0670381	0.00469398	0.0187858	0.000225007
2.61406	0.0296976	0.00865087	0.0657755	0.00490177	0.0185061	0.000227556
2.64575	0.0281337	0.00775446	0.0651081	0.00590214	0.0182505	0.000232086
2.67706	0.027127	0.00942765	0.0629672	0.00473935	0.0180074	0.000235012
2.70801	0.0283201	0.00847557	0.0614604	0.00451941	0.017794	0.000220294
2.73861	0.0270266	0.00799475	0.061003	0.00488074	0.0175637	0.000224802
2.76887	0.0278395	0.00757232	0.0597282	0.00464074	0.0173632	0.000218882
2.82843	0.0265868	0.00934495	0.0563539	0.00441684	0.016916	0.000236788
2.85774	0.0260172	0.00781577	0.0557832	0.00409964	0.0167786	0.000211084
2.88675	0.0263012	0.00828404	0.054686	0.00407581	0.016591	0.000215099
2.91548	0.0265041	0.00807833	0.0536762	0.00409528	0.0164335	0.000213551
2.94392	0.0255775	0.00820883	0.0534631	0.0047887	0.0162323	0.000213508
2.97209	0.0256368	0.00796479	0.0519555	0.00386531	0.0160849	0.000209268
3	0.0249252	0.00763995	0.0504842	0.00355958	0.015923	0.00020535
3.05505	0.0231013	0.00774144	0.0491378	0.00381842	0.0155932	0.000203151
3.08221	0.0241531	0.00772186	0.0473705	0.00333894	0.0154485	0.000201624
3.10913	0.0251543	0.00743342	0.046921	0.00308276	0.0153527	0.000202864
3.13581	0.0236368	0.00754762	0.0460995	0.0031455	0.0151887	0.000197408
3.18852	0.0221454	0.00701717	0.0446636	0.00345853	0.0149039	0.000195372
3.21455	0.022174	0.00822171	0.0437667	0.00329503	0.0147955	0.000195995
3.26599	0.0255332	0.00981342	0.0404639	0.005225	0.0146622	0.000215007
3.2914	0.0220902	0.00770754	0.0411631	0.0030496	0.0144629	0.000196956
3.31662	0.0221857	0.00738015	0.0402513	0.00272641	0.0143497	0.000191455
3.34166	0.0204629	0.00711719	0.0392722	0.00287731	0.0142269	0.000181189
3.3665	0.0218012	0.00677955	0.0384661	0.00280643	0.0141467	0.000191979
3.39116	0.0214826	0.00782094	0.0379036	0.00253957	0.0140568	0.000190447
3.41565	0.0199309	0.00536312	0.0379779	0.0027335	0.013888	0.000206186
3.4641	0.0208626	0.00803655	0.0360998	0.00245639	0.0137651	0.000189671
3.48807	0.0201134	0.00823011	0.0355101	0.00259789	0.0136617	0.000190847
3.51188	0.0198458	0.00683144	0.034931	0.00219072	0.0135655	0.000180226
3.53553	0.0194509	0.00715622	0.0346746	0.00273996	0.0134502	0.000185718
3.55903	0.0181566	0.00674993	0.0338777	0.00296685	0.0133468	0.000199698
3.58236	0.0192537	0.00575448	0.0331602	0.00203738	0.0132866	0.000185587
3.60555	0.0184576	0.00623029	0.0327496	0.00236714	0.0131927	0.000185753
3.65148	0.0193467	0.00749182	0.0315561	0.00202172	0.0131009	0.000177153
3.67423	0.0187259	0.00568881	0.0309823	0.00184804	0.0129894	0.000174779
3.69685	0.0193711	0.00693487	0.029663	0.00280956	0.0129875	0.000170972
3.71932	0.0187721	0.0050944	0.0296757	0.00187417	0.0128555	0.000174617
3.74166	0.0180252	0.00641816	0.0292713	0.00176771	0.0127796	0.00017215
3.76386	0.0189694	0.00739645	0.0284817	0.00192915	0.0127561	0.000172408
3.78594	0.0184465	0.00634482	0.0282008	0.00174358	0.0126549	0.000172081
3.82971	0.0178764	0.00549359	0.0277351	0.00174324	0.0124406	0.000212183
3.85141	0.0173838	0.00583933	0.0269818	0.00170884	0.0124448	0.000165088
3.87298	0.0176299	0.00513273	0.0265575	0.00149796	0.0123797	0.000166758
3.89444	0.0176645	0.00592721	0.0259928	0.00139198	0.0123882	0.000172371
3.937	0.016784	0.00573453	0.0251734	0.0017033	0.0121899	0.000163765
3.95811	0.0165656	0.00525694	0.025083	0.00126428	0.0121468	0.000162352
4	0.0167673	0.00510083	0.0240221	0.00156094	0.0120061	0.000157858
4.02078	0.0169971	0.00563258	0.0238224	0.00122016	0.011975	0.000181022
4.04145	0.0163504	0.00521857	0.0232872	0.0012437	0.0119391	0.00015275
4.06202	0.0160035	0.00554801	0.022855	0.00139274	0.0118696	0.000155547
4.08248	0.0165349	0.00673093	0.0220133	0.00197886	0.0118715	0.000136829
4.10284	0.0162579	0.00521802	0.0219975	0.00120133	0.0117881	0.000146064
4.12311	0.0165913	0.00544536	0.0213632	0.00119834	0.0117754	0.00014082
4.16333	0.0162002	0.00534653	0.0209051	0.00122309	0.0116576	0.000146333
4.1833	0.0164509	0.00466052	0.0205978	0.000700746	0.0116183	0.000145745
4.20317	0.0150201	0.00486176	0.0204906	0.00110885	0.0115701	0.000137461
4.22295	0.0159818	0.00533341	0.0202955	0.0013575	0.0115098	0.000140831
4.24264	0.0157725	0.00529736	0.0201548	0.00172804	0.0115103	0.00015712
4.26224	0.0155853	0.0042937	0.0197183	0.000949403	0.0114127	0.000147288
4.28174	0.0156769	0.00471925	0.0191675	0.000747825	0.0113818	0.000152775
4.33974	0.0145161	0.00490659	0.0185927	0.000985045	0.011291	0.000129142
4.3589	0.0154018	0.00585343	0.018377	0.00162392	0.0111863	0.00013327
4.37798	0.014681	0.00455188	0.0178138	0.0013828	0.011163	0.000133093
4.39697	0.0151152	0.00443231	0.0178695	0.000922303	0.0111233	0.000138193
4.41588	0.0149178	0.00500774	0.0175585	0.00158413	0.0111309	0.00012816
4.43471	0.0145282	0.00458367	0.0170423	0.00109237	0.0111023	0.000127599
4.47214	0.013818	0.00427848	0.0165212	0.000511872	0.0110428	0.000135981
4.49073	0.0151957	0.00540962	0.0161214	0.00116506	0.0109525	0.000141361
4.50925	0.0147331	0.00518416	0.0161433	0.0009001	0.0109264	0.000119283
4.52769	0.014618	0.00494879	0.0154156	0.000893502	0.010928	0.000139834
4.56435	0.0138667	0.00398157	0.0152506	0.000436089	0.0108489	0.00012674
4.58258	0.014276	0.00413945	0.0150192	0.000680365	0.0108479	0.000128503
4.6188	0.0146606	0.0058655	0.0155183	0.00249899	0.0107437	8.82422e-05
4.63681	0.0139873	0.00444915	0.014911	0.00114472	0.0107114	0.000116881
4.65475	0.0137891	0.00387085	0.0145118	0.00169061	0.0107339	0.000124929
4.67262	0.0138704	0.00415251	0.0143195	0.00142669	0.0106823	0.000117696
4.69042	0.0134967	0.00462953	0.0145844	0.00129686	0.0106183	0.00010696
4.70815	0.0140646	0.00523307	0.0138234	0.000702283	0.0105455	0.000112105
4.72582	0.0137766	0.00448493	0.0136121	0.000607665	0.010578	0.000123682
4.76095	0.0144739	0.00436409	0.0131924	0.00125081	0.0104975	0.000121458
4.77842	0.0140281	0.00400663	0.0135729	0.00187006	0.0105111	0.000116927
4.79583	0.0131502	0.00365637	0.0132173	0.00129865	0.0104556	0.000120394
4.81318	0.0136454	0.0043616	0.0128759	0.000732857	0.0104304	0.000118222
4.83046	0.0136612	0.00431944	0.0123536	0.000733548	0.0104188	0.000115902
4.84768	0.0126974	0.00391899	0.0122396	0.000789183	0.0104063	0.000122963
4.86484	0.0130274	0.0054485	0.0120062	0.000865317	0.0102986	0.000103888
4.89898	0.0125878	0.00391887	0.0125163	0.00233176	0.0102749	0.000109528
4.91596	0.0130751	0.00370969	0.0117325	0.00112002	0.0103186	9.83701e-05
4.93288	0.0129505	0.00339023	0.0119729	0.00148672	0.0102865	0.000101421
4.94975	0.0130124	0.00373356	0.0118831	0.00150475	0.0102797	0.000114877
4.96655	0.0113863	0.00474156	0.0110554	0.00303576	0.0103554	0.000168414
4.98331	0.013101	0.00331224	0.0115055	0.00166545	0.0102111	0.000100632
5	0.012985	0.00381108	0.011088	0.000692082	0.0101923	0.000105291
5.03322	0.0120674	0.00338604	0.0104206	0.000818681	0.0101547	0.000113031
5.04975	0.0124621	0.003159	0.0105635	0.000588618	0.0101055	0.000104294
5.06623	0.0123847	0.00246513	0.0110651	0.00255186	0.0101236	0.000114249
5.08265	0.0122209	0.00404412	0.0101588	0.00105089	0.0100434	0.000104875
5.11534	0.0120274	0.0023515	0.010207	0.00143837	0.0101206	0.000145388
5.1316	0.0128448	0.00387955	0.00995053	0.000791211	0.0100166	0.000100778
5.16398	0.0108974	0.00350483	0.0108963	0.00463926	0.0100693	0.000150712
5.18009	0.011861	0.00339155	0.00984982	0.00122039	0.00995176	0.000101673
5.19615	0.0121869	0.00369911	0.00925771	0.00158837	0.00994094	0.000101478
5.21217	0.0138469	0.00514744	0.010287	0.00258037	0.00991711	7.70408e-05
5.22813	0.0119705	0.00231838	0.00954135	0.00113658	0.00992553	0.000104303
5.24404	0.0123715	0.00350661	0.00920025	0.000779682	0.00986268	8.37466e-05
5.25991	0.0123142	0.00430722	0.00906722	0.00072235	0.00982725	8.97003e-05
5.2915	0.0129735	0.00394419	0.00928007	0.00188067	0.0098138	8.77432e-05
5.30723	0.011206	0.00191007	0.00899692	0.00155328	0.00989915	0.000147083
5.32291	0.0106966	0.00164495	0.00930381	0.00271015	0.00982715	0.000103137
5.33854	0.0111392	0.00178706	0.0089185	0.00200643	0.00981359	9.51611e-05
5.35413	0.0120868	0.00593052	0.00779554	0.00176564	0.00969927	8.47295e-05
5.36967	0.0112559	0.00222675	0.0084678	0.00106835	0.00977636	0.000106513
5.38516	0.0106656	0.00217241	0.00847184	0.00194085	0.00976859	0.000106138
5.41603	0.0117628	0.00280773	0.0074114	0.00219593	0.00975714	0.000151281
5.43139	0.0106431	0.00218203	0.00861396	0.00221852	0.00972194	0.000105128
5.44671	0.010807	0.00202213	0.00808614	0.00111267	0.00971512	0.000127341
5.46199	0.0107297	0.00174882	0.00812539	0.0015577	0.00969318	0.000110924
5.47723	0.0109017	0.0034182	0.00789991	0.00105624	0.00961986	8.89609e-05
5.49242	0.0112091	0.00282784	0.00806959	0.00144774	0.00961157	9.14816e-05
5.50757	0.0113002	0.00252096	0.00769244	0.00106023	0.00965294	9.02589e-05
5.53775	0.0112137	0.00274646	0.00781851	0.00160846	0.00962574	0.000116908
5.55278	0.0112256	0.00261952	0.00738743	0.000708299	0.00957227	8.61932e-05
5.56776	0.0108045	0.00158784	0.00756473	0.0016213	0.0095984	9.93714e-05
5.58271	0.00964963	0.00274354	0.00728419	0.00106498	0.00956569	0.000114146
5.61249	0.010621	0.00208569	0.00712674	0.00101136	0.00953446	9.99305e-05
5.62731	0.0106072	0.00492984	0.0069667	0.000870373	0.00945629	9.85236e-05
5.65685	0.011009	0.00633131	0.00696507	0.00217346	0.00938951	0.000129501
5.67157	0.0113865	0.0024382	0.00661242	0.000917422	0.00947227	8.4957e-05
5.68624	0.0106816	0.00213634	0.00690094	0.00110881	0.00947431	9.37892e-05
5.70088	0.0103025	0.00205821	0.00708569	0.00215088	0.00947576	0.000105948
5.71548	0.0101667	0.0016067	0.00620185	0.00128983	0.00947053	0.000106586
5.73004	0.0089967	0.0014561	0.0067991	0.00207352	0.00944154	9.43844e-05
5.74456	0.00930279	0.00124389	0.00730744	0.00298604	0.00945135	0.000110577
5.7735	0.00904067	0.00143181	0.0069286	0.00231884	0.00939122	9.95372e-05
5.78792	0.00937527	0.00158445	0.00677035	0.00216974	0.00944605	0.000108487
5.8023	0.0105289	0.00170359	0.00600403	0.000560008	0.00937177	7.84233e-05
5.81664	0.0108898	0.00218179	0.00612968	0.000821377	0.00939244	9.21425e-05
5.83095	0.00915394	0.00210125	0.00715939	0.0033104	0.0094355	0.000119201
5.84523	0.0101221	0.00166151	0.00658169	0.00199797	0.00941062	0.000120175
5.85947	0.00946766	0.00125637	0.00642341	0.00201161	0.00934013	0.000101047
5.88784	0.00992331	0.00138845	0.00598136	0.00221558	0.0093397	8.53388e-05
5.90198	0.00965955	0.00116183	0.00618193	0.00168147	0.00933404	9.96452e-05
5.91608	0.0100324	0.00239258	0.00521027	0.00123506	0.00927912	8.78344e-05
5.93015	0.00939623	0.0044973	0.00549418	0.000396695	0.00919915	9.73695e-05
5.94418	0.00948749	0.00133447	0.00651491	0.00291034	0.00932231	0.00011118
5.95819	0.00893259	0.0012754	0.00693409	0.00361188	0.0092849	0.000117736
5.97216	0.00964414	0.00270327	0.00589223	0.00143128	0.00934255	0.000142416
6	0.00907666	0.00196892	0.00590919	0.0017177	0.00928794	0.000113972
6.01387	0.00847064	0.00291848	0.00513155	0.000580902	0.00915513	9.06135e-05
6.02771	0.00936459	0.00186147	0.00493015	0.000755155	0.00918371	7.84313e-05
6.04152	0.0102067	0.00120369	0.00542064	0.00144978	0.00921779	8.87477e-05
6.06905	0.00936787	0.00141967	0.00551725	0.0012427	0.00921901	9.65756e-05
6.08276	0.0096309	0.00148174	0.00586514	0.00262102	0.00922336	0.000102149
6.1101	0.00906653	0.00233709	0.00472007	0.000757586	0.00912115	6.8519e-05
6.12372	0.00845145	0.0014284	0.0053977	0.00177025	0.00917604	9.43516e-05
6.13732	0.00809627	0.00222119	0.00587749	0.0029819	0.00918108	9.4584e-05
6.15088	0.00778231	0.00179081	0.00504538	0.00115423	0.00916693	9.20834e-05
6.16441	0.00906634	0.00192438	0.00515952	0.00102358	0.00912207	9.26194e-05
6.17792	0.00875752	0.000928814	0.00533846	0.00202098	0.00914071	8.63442e-05
6.19139	0.00845103	0.00159449	0.00534738	0.00160706	0.00916479	9.27358e-05
6.21825	0.00839052	0.00365871	0.00609968	0.00473174	0.00922846	0.000152936
6.23164	0.0081427	0.00219093	0.00558964	0.00314915	0.00916704	0.000113401
6.245	0.00874835	0.00118912	0.00483803	0.00151724	0.00908618	8.15335e-05
6.25833	0.0076479	0.0055674	0.00779722	0.00717503	0.0093703	0.000208532
6.27163	0.00757594	0.00203901	0.00478839	0.00148986	0.00910138	0.000111235
6.2849	0.0088689	0.00229704	0.00411901	0.000496279	0.00907032	7.16561e-05
6.29815	0.00706506	0.00242499	0.0057387	0.00284733	0.00913329	0.000124896
6.33772	0.00884785	0.00174768	0.00461139	0.00118398	0.00908093	0.000100801
6.35085	0.00878886	0.00192385	0.00546635	0.00304208	0.0090922	0.00010453
6.36396	0.0092332	0.0014906	0.00456166	0.000803353	0.00904075	7.1037e-05
6.37704	0.0082005	0.0015449	0.0042877	0.00110014	0.00892699	9.22422e-05
6.3901	0.00831988	0.00195634	0.00515391	0.00236891	0.00903496	9.9266e-05
6.40312	0.0077526	0.00205593	0.0036761	0.000724133	0.0089965	7.87198e-05
6.4291	0.00940387	0.00170488	0.00398549	0.000466018	0.00899133	5.95085e-05
6.44205	0.00800831	0.00214997	0.00395379	0.000830552	0.00895191	8.3865e-05
6.45497	0.00732956	0.00283559	0.00480965	0.00165665	0.0090551	0.000114528
6.46787	0.00751501	0.00210356	0.00456822	0.00219168	0.00898307	0.000103087
6.49359	0.00811547	0.0043895	0.00324109	0.000723011	0.00887827	0.000100633
6.50641	0.00858798	0.00197493	0.00442068	0.00158781	0.00900522	9.23751e-05
6.53197	0.00537011	0.00658404	0.00770661	0.00770597	0.00938079	0.00018687
6.54472	0.00755694	0.00162141	0.0041031	0.000959632	0.00893486	8.63667e-05
6.55744	0.00754456	0.0022116	0.00364732	0.000770637	0.00893364	8.02975e-05
6.57013	0.00843482	0.00171789	0.00445699	0.00166619	0.00900099	9.33327e-05
6.58281	0.00720356	0.00281878	0.00357208	0.000661412	0.00895054	8.97815e-05
6.59545	0.00722532	0.00293849	0.00416536	0.00164344	0.00898807	9.71832e-05
6.60808	0.00777117	0.00260085	0.00466215	0.00283784	0.00897053	0.00013032
6.63325	0.00747925	0.00327573	0.00415964	0.00193927	0.0089418	8.92429e-05
6.6458	0.00820378	0.00252716	0.00493334	0.00295248	0.00902386	0.000124576
6.65833	0.00799981	0.0016653	0.00407132	0.0014137	0.00889862	7.61835e-05
6.67083	0.0068173	0.00276119	0.0027041	0.00148413	0.00878127	0.000102372
6.68331	0.00987572	0.00154788	0.00364926	0.00136141	0.00890273	9.58567e-05
6.69577	0.00755021	0.00188242	0.00351974	0.000687486	0.00885733	7.73865e-05
6.7082	0.00829325	0.00187155	0.00345428	0.000573066	0.0088618	6.97819e-05
6.733	0.00688165	0.00286162	0.004995	0.00471636	0.00888667	0.000128422
6.74537	0.00821629	0.00236056	0.00468778	0.00292453	0.00894238	0.000113082
6.75771	0.00668631	0.00241456	0.00337854	0.00108809	0.00882369	0.000105693
6.77003	0.00713314	0.00277494	0.00326247	0.000652961	0.00889247	8.6159e-05
6.78233	0.00822305	0.00266029	0.00408291	0.00101758	0.0089668	9.51744e-05
6.79461	0.00902582	0.0019512	0.00352034	0.000812363	0.00893345	8.59733e-05
6.80686	0.00723169	0.0029243	0.00311432	0.000802939	0.00883767	8.14992e-05
6.8313	0.00573981	0.00379923	0.00188063	0.00197314	0.0086831	0.000170026
6.84349	0.0080499	0.00188469	0.00329752	0.00064606	0.00882755	7.90689e-05
6.85565	0.00678345	0.00473798	0.00443916	0.00329727	0.00884562	0.000109327
6.8678	0.0076956	0.00339168	0.00297315	0.000851375	0.00882585	9.10116e-05
6.89202	0.00778864	0.00253915	0.00283234	0.000505065	0.00876395	0.00010348
6.90411	0.00783241	0.0020412	0.00281759	0.00077009	0.00879093	6.52742e-05
6.9282	0.00886971	0.00206584	0.00439906	0.00107676	0.00886603	8.56909e-05
6.94022	0.00672483	0.0024636	0.0030907	0.00146839	0.00870121	0.000110683
6.95222	0.00759015	0.00207546	0.00283361	0.000893808	0.00882414	7.35627e-05
6.96419	0.00777295	0.00186712	0.00296593	0.000776526	0.00866311	0.000122951
6.97615	0.00779797	0.00219231	0.00366602	0.00154845	0.00879691	0.000104672
6.98809	0.00661012	0.00351445	0.00279169	0.000758959	0.00878233	9.37087e-05
7	0.00730759	0.00248461	0.00257322	0.000655753	0.0086742	9.12061e-05
7.02377	0.00783948	0.00237227	0.00343341	0.00117683	0.00879779	7.07479e-05
7.03562	0.00822565	0.00108879	0.00333797	0.00126855	0.00876383	5.3168e-05
7.04746	0.00681491	0.00429027	0.00261797	0.00103808	0.00883074	8.20982e-05
7.05927	0.00762807	0.00234205	0.00246757	0.00077918	0.00869163	8.40396e-05
7.07107	0.00783121	0.00256128	0.00312667	0.00173979	0.00869194	8.59178e-05
7.08284	0.00727652	0.00279232	0.00195655	0.00150787	0.00872087	0.000113998
7.0946	0.00747478	0.00454345	0.00195934	0.000967484	0.00860891	0.000155369
7.11805	0.00803557	0.00464034	0.00112611	0.00191845	0.00861266	0.000124512
7.12975	0.00707124	0.00292192	0.00212241	0.00106907	0.00870502	8.66468e-05
7.14143	0.00745047	0.00316854	0.00233454	0.000635736	0.00869388	9.89936e-05
7.15309	0.00687347	0.00378135	0.00328122	0.00157245	0.00878927	8.31218e-05
7.16473	0.00734262	0.00322666	0.00204649	0.000664217	0.00866331	0.000130272
7.17635	0.0064018	0.00499579	0.0033789	0.00188837	0.00872567	8.91422e-05
7.18795	0.00800272	0.00267979	0.00297125	0.00107735	0.00875957	6.40236e-05
7.2111	0.00785423	0.00267416	0.00193949	0.000736914	0.00863819	9.7437e-05
7.22265	0.00719586	0.00249309	0.00197206	0.00129693	0.00859251	0.000103822
7.23418	0.00727488	0.0023753	0.00208614	0.000816362	0.00862473	0.000105426
7.24569	0.00708589	0.00326362	0.00184535	0.00068929	0.00864834	9.71976e-05
7.26865	0.00895518	0.00131236	0.00290751	0.000917333	0.00867372	7.24029e-05
7.28011	0.00711596	0.00202339	0.0022774	0.000646822	0.00857858	0.000117441
7.30297	0.00633957	0.00423457	0.00315952	0.00145937	0.00885983	0.000114235
7.31437	0.00742445	0.00267284	0.00225364	0.000680183	0.0086542	8.7152e-05
7.32575	0.00786336	0.00187914	0.00215049	0.000800214	0.00863529	8.77871e-05
7.33712	0.00824025	0.00428613	0.00199278	0.00106127	0.00856351	0.00013805
7.34847	0.00612691	0.00455459	0.00210963	0.000956966	0.0086246	0.000103053
7.3598	0.00733582	0.00373415	0.00198888	0.000948763	0.00859221	0.000112274
7.37111	0.00696578	0.00278047	0.00221772	0.000698328	0.00858195	0.000100767
7.39369	0.00969063	0.0016519	0.00272663	0.00177344	0.00881733	9.83946e-05
7.40495	0.00771722	0.00360397	0.00182775	0.000658159	0.00858759	0.00011431
7.4162	0.00907478	0.00231724	0.00179068	0.00269144	0.00879945	8.50564e-05
7.42743	0.00647352	0.00386744	0.00166857	0.0010835	0.00858419	0.00011944
7.43864	0.00611109	0.00400868	0.00112635	0.002432	0.00852571	0.00013887
7.44983	0.00685498	0.00391228	0.00146245	0.000658307	0.00850441	0.00016
7.46101	0.00836935	0.00293865	0.00312052	0.00255056	0.00864156	8.72989e-05
7.48331	0.00717337	0.00400173	0.00140402	0.00271153	0.00876628	7.94281e-05
7.49444	0.0071283	0.0041649	0.00106729	0.00149996	0.00853879	0.000127395
7.50555	0.00699783	0.00354605	0.00203384	0.000964711	0.00857683	7.85727e-05
7.51665	0.00749062	0.00281885	0.00114967	0.00153675	0.00846388	0.000155465
7.52773	0.00958822	0.00379563	0.00288559	0.00112475	0.00854069	0.00012055
7.53879	0.00743214	0.00234378	0.00250266	0.00110157	0.00858914	7.70853e-05
7.54983	0.00720811	0.00336747	0.00143464	0.00126214	0.00851782	0.000128215
7.57188	0.00830975	0.00251794	0.00223092	0.00138722	0.008495	0.000145135
7.58288	0.00635737	0.0043469	0.000976575	0.00261583	0.00854917	0.000126015
7.59386	0.00804123	0.00398869	0.00154035	0.000830768	0.00852401	0.000146117
7.60482	0.00904148	0.00231771	0.00297949	0.00222015	0.00858146	9.99782e-05
7.62671	0.00765045	0.00361239	0.00125501	0.000708685	0.00847406	0.000140394
7.63763	0.00739869	0.0035082	0.00193286	0.000903472	0.00851141	0.00012983
7.65942	0.00781846	0.0049933	-0.000747119	0.00326567	0.00835794	0.00023417
7.67029	0.0061343	0.00460938	0.00115927	0.0017409	0.00852053	0.000115254
7.68115	0.00762584	0.00378431	0.000802882	0.00144047	0.00844653	0.0001632
7.69199	0.00698873	0.00348816	0.00231536	0.00127408	0.00853764	9.50347e-05
7.70281	0.00785508	0.0031116	0.00202953	0.00069407	0.00856883	7.86467e-05
7.71362	0.00777858	0.00386687	0.00351202	0.00254259	0.00868462	7.8062e-05
7.72442	0.00539963	0.00535376	0.00137488	0.0016128	0.00839455	0.000217692
7.74597	0.00631758	0.00440026	0.00171638	0.00107468	0.00848522	0.000146716
7.75672	0.00616339	0.00423141	0.000971766	0.00224955	0.00849907	0.000113697
7.76745	0.00773631	0.00443378	0.00100263	0.00132364	0.00847913	0.000127894
7.77817	0.00770584	0.00617046	0.000539457	0.00144362	0.00840284	0.000183509
7.79957	0.00797326	0.00496808	0.00138744	0.000760186	0.00843659	0.000162529
7.81025	0.00791188	0.00306262	0.00149823	0.00119061	0.00842892	0.0001322
7.84219	0.00827793	0.00234419	0.0017609	0.000976377	0.00845279	0.000133921
7.85281	0.00705638	0.00272861	0.00227699	0.00139816	0.00848228	9.71685e-05
7.86342	0.00704642	0.00534318	0.000574569	0.001717	0.0083957	0.000192078
7.87401	0.00780433	0.00530497	0.00262527	0.00120546	0.00859631	9.0786e-05
7.88458	0.00858766	0.00194262	0.00256015	0.00173	0.00853672	8.22296e-05
7.89515	0.00738998	0.00378612	0.00117066	0.00111699	0.0084399	0.000129913
7.91623	0.00713334	0.00651689	-0.000163225	0.00266195	0.00837334	0.000173097
7.92675	0.00733721	0.00410786	0.000234408	0.00199035	0.008348	0.000216219
7.93725	0.00936929	0.00300851	0.00316928	0.00297831	0.00853436	0.0001069
7.96869	0.00773735	0.00409647	0.0014241	0.000728837	0.00844469	0.000136077
7.97914	0.00667688	0.00618416	0.000333537	0.00280072	0.00841614	0.000146795
8	0.00437343	0.00786837	0.00172788	0.00217329	0.00851158	0.000108468
8.01041	0.00886433	0.00498346	0.00220336	0.00126443	0.00846715	0.000132548
8.02081	0.00718735	0.00469822	0.00157382	0.00109108	0.0084424	0.000163041
8.03119	0.00618993	0.0056129	-0.000117433	0.00274557	0.00833211	0.000198875
8.04156	0.00736837	0.00684212	-0.000464336	0.00270759	0.00826117	0.000313537
8.05191	0.00622853	0.00592303	-1.01813e-05	0.00293336	0.00834161	0.000192959
8.06226	0.00728203	0.00595642	0.000385131	0.0012797	0.0083212	0.000225261
8.0829	0.00761899	0.00255038	0.001709	0.00117251	0.00846803	7.9823e-05
8.09321	0.00919696	0.0033564	0.00276887	0.00149427	0.00847062	0.000100707
8.1035	0.00842343	0.00458217	0.000639872	0.00154257	0.00835402	0.000178946
8.11377	0.00844636	0.00279853	0.00160013	0.000881243	0.00840336	0.000123539
8.12404	0.00765071	0.00229593	0.00142261	0.00104922	0.0083533	0.000178557
8.14453	0.0080601	0.00272252	0.00126657	0.000985326	0.00836197	0.000174449
8.16497	0.0105747	0.00477327	0.00389475	0.00407727	0.00852514	0.0001217
8.17517	0.00777071	0.0037616	0.00127409	0.000830402	0.00841015	0.000127807
8.18535	0.00834141	0.00588224	0.000114884	0.00220581	0.00835603	0.000171068
8.19553	0.00943492	0.0031182	0.00254924	0.00237373	0.00845494	0.000138805
8.20569	0.00860978	0.00380631	0.000530058	0.00169641	0.00833971	0.000181152
8.21584	0.00700803	0.00628901	0.000228323	0.00240947	0.00838143	0.00015558
8.22598	0.00459478	0.00683877	0.000138578	0.00319397	0.00830286	0.000246673
8.24621	0.0081733	0.0047991	0.00176356	0.00161984	0.00840653	0.000146776
8.25631	0.00826375	0.00461962	0.00145756	0.00107808	0.00834607	0.000217929
8.2664	0.00737585	0.00532411	0.000904921	0.00130667	0.00836493	0.000169704
8.27647	0.00707125	0.00534973	-0.000186725	0.00255045	0.00820364	0.000342198
8.29659	0.00713941	0.00560501	-0.000170706	0.00254352	0.00827265	0.000259201
8.30662	0.00844484	0.00589765	-0.000920974	0.00352183	0.00827114	0.00020647
8.32666	0.00930809	0.00545495	0.00252849	0.00182959	0.00845958	0.000138353
8.33667	0.00686761	0.00534608	0.000240096	0.00168496	0.0082578	0.000260664
8.34666	0.00678836	0.00642425	-0.000266956	0.00358283	0.00831168	0.000196135
8.35663	0.00818908	0.00727087	0.000193995	0.00146983	0.00831331	0.000201555
8.3666	0.00452986	0.00723083	0.000433761	0.00302575	0.00836547	0.000181082
8.37655	0.00826907	0.00334281	0.000387645	0.00259903	0.00827478	0.000199474
8.3865	0.00987206	0.00600588	0.00279223	0.00154354	0.00839746	0.000124234
8.41625	0.0083873	0.00300636	0.00172886	0.000946544	0.00837327	0.000137241
8.42615	0.00866846	0.00286053	0.00169455	0.000657034	0.00839595	0.000119011
8.43603	0.00618391	0.00575991	-0.000593984	0.00435297	0.00824754	0.000266591
8.44591	0.00775406	0.00803616	-6.35393e-05	0.00131678	0.00830324	0.000189739
8.45577	0.00917659	0.00389377	-0.000116241	0.00265541	0.00829482	0.000186206
8.46562	0.00858005	0.00534312	0.00121932	0.000774832	0.00836522	0.000156559
8.48528	0.00624702	0.00512872	-0.000162557	0.00313132	0.00815385	0.000365608
8.4951	0.00729041	0.00546337	-0.00102299	0.00510303	0.00824655	0.000230358
8.5049	0.00766551	0.00362737	0.000548985	0.00179621	0.00825429	0.000264784
8.52447	0.00750765	0.00723593	0.000124168	0.00248619	0.00835412	0.000173381
8.53424	0.00679006	0.00630777	0.00138755	0.00101446	0.00835822	0.000164973
8.544	0.00697121	0.00436296	-0.000592765	0.00343453	0.00816551	0.00033729
8.56349	0.00695394	0.00453883	-0.000424821	0.00317175	0.0081724	0.000327753
8.57321	0.00765231	0.00586773	0.000296378	0.00192331	0.00832663	0.000183762
8.59263	0.00843754	0.00696703	-0.000656112	0.00343646	0.00826669	0.000208247
8.62168	0.00737678	0.00635988	-0.000315059	0.00267746	0.00823813	0.000253188
8.65063	0.00732347	0.00652024	-0.000444786	0.0038051	0.00829937	0.000197376
8.66025	0.00761962	0.00523029	0.000191254	0.00267328	0.00827403	0.000207207
8.66987	0.00886581	0.0065612	0.00305112	0.00175659	0.00837186	0.000141213
8.67948	0.00986144	0.00712181	0.00307812	0.00172618	0.008391	0.000124424
8.68907	0.0101502	0.00652988	0.00282638	0.00165607	0.00838873	0.000125905
8.69866	0.00895579	0.00603587	0.00268338	0.00202526	0.00837283	0.000143658
8.7178	0.0080853	0.00359513	0.000224903	0.00243026	0.00828966	0.00017613
8.72735	0.0075206	0.0076332	-0.000125625	0.00196683	0.00823945	0.0002495
8.73689	0.00752219	0.00553543	-0.00122424	0.00517882	0.00822656	0.000241391
8.74643	0.00767351	0.00279072	0.00112426	0.00133168	0.00825318	0.000226624
8.76546	0.00737477	0.00440182	0.000413967	0.00176658	0.0082483	0.000247308
8.79394	0.00708754	0.00583226	-0.00111244	0.00541551	0.00824644	0.000225982
8.80341	0.00687285	0.00400788	-0.000930741	0.00437119	0.00814372	0.000325777
8.81287	0.00749095	0.00774953	0.00255482	0.00405474	0.00836528	0.000164362
8.82232	0.00673777	0.00468546	-0.000245106	0.00376102	0.0081519	0.000341662
8.83176	0.00830622	0.00756098	0.00230391	0.00329539	0.00838566	0.000164567
8.84119	0.00661484	0.0046295	-0.0006587	0.00428557	0.00816245	0.000320457
8.85061	0.00851274	0.00780806	-0.000800737	0.00297182	0.00825679	0.000226222
8.87881	0.00734195	0.00394932	-0.00179435	0.0055994	0.0081668	0.000283349
8.88819	0.00834929	0.00782988	-0.000546391	0.00332416	0.00826668	0.000208335
8.89757	0.00740913	0.0061928	-0.000665791	0.00334535	0.00822743	0.000241152
8.91628	0.00684258	0.00875505	0.000429469	0.00144824	0.00826453	0.000237763
8.95358	0.00731918	0.00413605	0.000464574	0.00299179	0.00825776	0.00019092
8.96289	0.00734942	0.00276536	0.00123614	0.00190648	0.00823001	0.000197616
8.98146	0.00572201	0.00293075	-0.000974266	0.00515277	0.00810494	0.000347043
8.99074	0.00827401	0.00383729	-0.000219366	0.00301886	0.00826272	0.000188772
9	0.00715755	0.00573418	-0.00054432	0.00343987	0.00817441	0.000292676
9.0185	0.00809154	0.0112599	0.000222406	0.0010008	0.00829869	0.00020533
9.02774	0.00820608	0.00542382	-0.00155065	0.00558433	0.00821856	0.000231814
9.03696	0.00668868	0.00280197	0.000738675	0.00185058	0.00820496	0.000260189
9.05539	0.00665475	0.00329671	-0.00114582	0.00521989	0.00812298	0.000316818
9.07377	0.00650324	0.0035489	-0.00112723	0.00534396	0.00813652	0.000314449
9.10128	0.0071673	0.00848816	0.00286503	0.00500098	0.00835799	0.000162988
9.11043	0.00619184	0.00686217	-0.000138689	0.00393858	0.00814613	0.000336475
9.11958	0.00884876	0.00925046	-0.00078057	0.00263581	0.00826109	0.000240582
9.12871	0.00621299	0.00520832	-0.000664206	0.00445317	0.00815981	0.00031303
9.13783	0.00879756	0.0087578	-0.000639248	0.00257522	0.00825654	0.000225966
9.14695	0.00717538	0.00405865	-0.00191796	0.00619353	0.0081628	0.000281138
9.18332	0.00716646	0.00759371	-0.000142897	0.00203281	0.00825439	0.000218515
9.19239	0.00513442	0.00328935	-0.00112115	0.00535838	0.0080728	0.000357229
9.2105	0.00576564	0.00240015	-0.00133811	0.00569371	0.00807842	0.000343629
9.2376	0.00780825	0.00677806	0.00449185	0.00402366	0.00836456	0.000194316
9.24662	0.00600835	0.00244794	-0.000474936	0.00443412	0.00811954	0.000297115
9.25563	0.00783063	0.00551813	-0.001453	0.00457606	0.00822111	0.00026747
9.26463	0.00569741	0.00283682	-0.00108567	0.00535976	0.00810394	0.000328012
9.27362	0.0082998	0.00436968	-0.000727539	0.0036773	0.0082402	0.000212597
9.2826	0.00830819	0.0135773	0.000209251	0.00109326	0.00830514	0.000203325
9.31844	0.00610976	0.00387906	-0.000842225	0.00489865	0.00813352	0.000298412
9.35414	0.005941	0.00356419	-0.00129818	0.00593149	0.00813348	0.000307672
9.38083	0.00593748	0.00875034	0.00302481	0.00534685	0.0083485	0.000157336
9.39858	0.00913089	0.0103727	-0.000689636	0.00241457	0.00826513	0.000243502
9.40744	0.00716963	0.00421313	-0.00190605	0.00641501	0.00816399	0.000290229
9.42514	0.00734319	0.00415974	-0.00196816	0.0062595	0.0081627	0.000279498
9.43398	0.00489266	0.0041387	-0.00187226	0.00662821	0.00804949	0.000339142
9.45163	0.00554081	0.00373453	-0.00163073	0.00576048	0.0080617	0.000336372
9.46044	0.00687073	0.0114187	0.00134781	0.00219736	0.00834001	0.000164683
9.46925	0.00517754	0.00406208	-0.00170613	0.00656786	0.00806275	0.000323206
9.50438	0.00542798	0.00425929	-0.00152986	0.00614188	0.00808512	0.00032735
9.5219	0.00430273	0.0046833	-0.000759791	0.00547502	0.00807711	0.000322459
9.53065	0.00815692	0.0057572	-0.00132528	0.00412362	0.00822521	0.000274624
9.53939	0.00481985	0.00385725	-0.00118671	0.00590614	0.00809889	0.000320492
9.55685	0.00813522	0.0140147	7.11322e-05	0.00123166	0.00831495	0.000200805
9.57427	0.00678685	0.00439914	-0.00182078	0.00691845	0.00810608	0.00031229
9.59166	0.00633232	0.00414869	-0.00189736	0.00715052	0.00811233	0.000306256
9.66954	0.00577316	0.00459769	-0.00201981	0.00617605	0.00807831	0.000301409
9.67815	0.0072644	0.00406531	-0.0018364	0.00629109	0.00816703	0.000294406
9.68676	0.0047906	0.0068121	-0.00212005	0.00724798	0.00802991	0.000313884
9.70395	0.00531282	0.00584757	-0.00198983	0.00643628	0.00805315	0.000326357
9.73824	0.00433163	0.00553977	-0.0016179	0.00675453	0.00805373	0.000313577
9.75534	0.00575606	0.00597124	-0.00174928	0.00648905	0.00807772	0.000334266
9.77241	0.00522978	0.004384	-0.00159417	0.00655379	0.00808224	0.000326362
9.79796	0.00814795	0.00596915	-0.00115192	0.00378711	0.00823383	0.00028529
9.84039	0.00678807	0.00426442	-0.00188444	0.00701721	0.00810625	0.00031671
9.89949	0.00511818	0.0110924	-0.00258733	0.0075237	0.00800189	0.000294571
9.91632	0.00544111	0.0093238	-0.00231693	0.00711827	0.00801553	0.000304777
9.9415	0.00724204	0.00355427	-0.00162108	0.00617773	0.00817102	0.000302033
9.94987	0.00572874	0.00770884	-0.00205474	0.00683998	0.00804184	0.000323386
9.96661	0.00513881	0.0068096	-0.00192255	0.00654566	0.00804909	0.000325101
10.0167	0.00616309	0.00590265	-0.00164635	0.00652587	0.0080767	0.000339875
10.0995	0.00672648	0.00355517	-0.00153937	0.00629149	0.00810673	0.000324782
10.1407	0.00626136	0.0126056	-0.00243544	0.00715761	0.00798003	0.000279007
10.1571	0.00696538	0.0114359	-0.00243561	0.00722819	0.00800912	0.000309135
10.1735	0.00575123	0.0106455	-0.00198245	0.00661595	0.00801048	0.000302622
10.2062	0.00680936	0.0088581	-0.00195903	0.00668267	0.00805283	0.000342377
10.2713	0.00641633	0.00536511	-0.00154533	0.00615796	0.00807823	0.000348555
10.3763	0.00769569	0.0151762	-0.00243951	0.0067851	0.0079563	0.000280402
10.3923	0.00731821	0.0128553	-0.00221557	0.00690426	0.00797352	0.000283425
10.4083	0.0078109	0.0127395	-0.00224014	0.00684636	0.00800855	0.000319342
10.4563	0.00734684	0.00905304	-0.00189817	0.00663289	0.00805607	0.0003513
10.6066	0.00852569	0.0185574	-0.002133	0.00523685	0.00792347	0.000287975
10.6223	0.00829014	0.0157532	-0.0023617	0.00647309	0.00795077	0.000295475
10.6536	0.00825137	0.0136823	-0.0022242	0.00673965	0.00800951	0.000333568
10.8474	0.00856594	0.0199371	-0.00202255	0.00438078	0.00791936	0.000308369
10.8628	0.00783745	0.0171237	-0.00253782	0.00642592	0.00794755	0.000311941
11.083	0.00828483	0.02272	-0.0016458	0.00333324	0.00791833	0.00033038
11.3137	0.00874901	0.0275357	-0.000469267	0.00450124	0.00791803	0.000360221
			Fig. S5, pY-Caprin1 self-correlation at [ATP-Mg]=0.0001, 0.05 and 8.0 b^{-3}
r/b	0.0001(Avg)	0.0001(Std)	0.05(Avg)	0.05(Std)	8.0(Avg)	8.0(Std)
0	0.541081	0.0161471	0.324819	0.0175095	0.172892	0.00306945
0.408248	0.480033	0.0144788	0.281837	0.0125895	0.136459	0.00244503
0.57735	0.437018	0.0142047	0.248784	0.0112296	0.111461	0.00201767
0.707107	0.402911	0.0136402	0.22494	0.0106718	0.0940002	0.00171579
0.816497	0.374831	0.0121086	0.205801	0.0111668	0.0812281	0.00150888
0.912871	0.35249	0.0116451	0.191898	0.0110913	0.072182	0.00135062
1	0.332503	0.0108425	0.180789	0.0108287	0.0653209	0.00122378
1.1547	0.299898	0.00929059	0.162095	0.0117194	0.0556024	0.00105837
1.22474	0.285174	0.00883354	0.155242	0.0115501	0.0520574	0.000990356
1.29099	0.272912	0.00810749	0.149033	0.00915125	0.0490823	0.000957094
1.35401	0.260435	0.00744878	0.142398	0.0109873	0.0464478	0.000899184
1.41421	0.247867	0.00749509	0.137662	0.0141733	0.044107	0.000822239
1.47196	0.238048	0.00650995	0.130422	0.0134327	0.0421032	0.000819226
1.52753	0.228135	0.00629575	0.126313	0.0125267	0.0402736	0.000771587
1.63299	0.21008	0.00442586	0.116879	0.00719517	0.0370808	0.000742202
1.68325	0.201173	0.00491517	0.11319	0.0112655	0.0357545	0.000686122
1.73205	0.193107	0.00425544	0.108672	0.0124603	0.0345194	0.000675302
1.77951	0.185182	0.00434587	0.106531	0.0129596	0.0333776	0.000634072
1.82574	0.178276	0.0039753	0.101252	0.0127825	0.0323222	0.000629482
1.87083	0.171525	0.00380043	0.0988582	0.0122582	0.0313428	0.000600244
1.91485	0.164594	0.00432116	0.0987539	0.00968639	0.0304215	0.000556893
2	0.152902	0.00367195	0.0908151	0.0111059	0.0287985	0.000532664
2.04124	0.146166	0.002311	0.0867262	0.0111867	0.0280862	0.000540244
2.08167	0.141161	0.00218239	0.084976	0.0101675	0.0273941	0.000521117
2.12132	0.136432	0.00315432	0.0818647	0.0108927	0.026753	0.000514227
2.19848	0.126289	0.0023439	0.0789452	0.00900808	0.0255415	0.000469912
2.23607	0.121821	0.00209341	0.0753824	0.00981676	0.0250129	0.000475344
2.3094	0.112412	0.00245069	0.0721306	0.00972594	0.0239961	0.000435369
2.34521	0.108961	0.00155481	0.0720135	0.00656617	0.0235325	0.00042485
2.38048	0.105627	0.00202171	0.0692009	0.00851742	0.0230883	0.000412038
2.41523	0.101539	0.00141117	0.0674751	0.00740322	0.022677	0.000413687
2.44949	0.0985682	0.00230199	0.065246	0.00688453	0.022267	0.00040335
2.48328	0.0947279	0.00339328	0.0612192	0.00647923	0.0219119	0.000454486
2.51661	0.0917157	0.00178877	0.0624978	0.00571849	0.0215351	0.000398206
2.58199	0.0851338	0.00192872	0.057876	0.00656097	0.0208697	0.000411639
2.61406	0.082971	0.0016851	0.0573021	0.00620406	0.0205379	0.000373
2.64575	0.0795893	0.00189936	0.0579641	0.004423	0.0202238	0.000354695
2.67706	0.0780187	0.0022624	0.0561835	0.00562232	0.0199212	0.000333831
2.70801	0.0740299	0.00243373	0.053479	0.00611242	0.0196583	0.000365589
2.73861	0.0723987	0.00207771	0.053079	0.00473167	0.0193755	0.000341037
2.76887	0.0698315	0.00212739	0.0517069	0.00474178	0.0191251	0.000350871
2.82843	0.0677207	0.00314034	0.0481113	0.00846462	0.0186154	0.000289084
2.85774	0.0631052	0.00198521	0.0479338	0.00427234	0.0183957	0.000336748
2.88675	0.0617537	0.00217165	0.0466273	0.00432214	0.0181753	0.000321277
2.91548	0.0592248	0.00212135	0.0454532	0.00299224	0.0179685	0.000335074
2.94392	0.0571986	0.00185673	0.0450482	0.00317439	0.0177375	0.0003075
2.97209	0.0555367	0.00187772	0.0440304	0.00327214	0.0175402	0.000318058
3	0.0540945	0.00205988	0.0427332	0.00375956	0.017341	0.000317625
3.05505	0.0505323	0.00194945	0.0408153	0.00516999	0.0169492	0.000295922
3.08221	0.0492961	0.00210645	0.0393341	0.00562913	0.0167818	0.000292831
3.10913	0.0475753	0.00193156	0.0407206	0.00213945	0.0166166	0.00030195
3.13581	0.0462834	0.00184118	0.0387813	0.0029504	0.0164397	0.000292815
3.18852	0.0433653	0.00233221	0.0373304	0.0031153	0.0161062	0.000273232
3.21455	0.0416013	0.00236216	0.0365497	0.00228295	0.0159589	0.00027906
3.26599	0.039738	0.00414536	0.0337786	0.00745104	0.0156676	0.000311814
3.2914	0.0382318	0.00203525	0.035053	0.00272921	0.0155205	0.000269897
3.31662	0.0370698	0.00199571	0.0335429	0.00239484	0.0153844	0.000265259
3.34166	0.0360776	0.00229234	0.0324971	0.00322195	0.0152388	0.000278494
3.3665	0.0351113	0.00198169	0.0319656	0.00304083	0.015117	0.00026666
3.39116	0.033515	0.00219383	0.0311689	0.00327582	0.014992	0.000268338
3.41565	0.0331053	0.0024018	0.0321386	0.00349853	0.0148554	0.000258789
3.4641	0.0303414	0.00191587	0.030003	0.00280742	0.0146296	0.000248853
3.48807	0.029886	0.00205425	0.0310256	0.00385096	0.0145134	0.000234633
3.51188	0.029113	0.00197936	0.0295764	0.00219826	0.0143951	0.000241779
3.53553	0.028345	0.00201618	0.029739	0.00403414	0.0142855	0.00022219
3.55903	0.0273077	0.00189884	0.0288643	0.00375699	0.0141763	0.000234982
3.58236	0.0270415	0.00225561	0.0273899	0.00206808	0.014071	0.000240593
3.60555	0.0259371	0.00207586	0.0278487	0.00311899	0.0139668	0.000231378
3.65148	0.0242073	0.00167251	0.0278662	0.00373915	0.013779	0.000205198
3.67423	0.0237522	0.00200872	0.027095	0.00401195	0.0136769	0.000220683
3.69685	0.0233143	0.00224617	0.0246786	0.00275884	0.0136003	0.000228586
3.71932	0.0225066	0.00246601	0.0249935	0.00296319	0.013495	0.000221952
3.74166	0.021861	0.00224236	0.0253982	0.00331206	0.0134037	0.000218526
3.76386	0.0208074	0.00224921	0.0250547	0.00484982	0.0133273	0.00019407
3.78594	0.0205184	0.00219082	0.0240341	0.00279496	0.0132357	0.000196649
3.82971	0.0205993	0.00292936	0.024256	0.00432904	0.0130562	0.000213877
3.85141	0.0190502	0.00202134	0.0229882	0.0031335	0.0129859	0.000197675
3.87298	0.0187209	0.00204293	0.0231543	0.00364694	0.0129055	0.000187716
3.89444	0.017863	0.0018713	0.0220668	0.00304815	0.0128433	0.000190168
3.937	0.017193	0.00212466	0.0224169	0.00428723	0.0126793	0.000189426
3.95811	0.0170791	0.00183806	0.0208566	0.00331575	0.0126102	0.000191896
4	0.0158826	0.00233393	0.0211755	0.00431582	0.0124535	0.000193877
4.02078	0.0156449	0.00230319	0.0202477	0.00256249	0.0123994	0.000169644
4.04145	0.0149153	0.0020426	0.0202545	0.00382343	0.012335	0.000174579
4.06202	0.0145953	0.00226581	0.0200635	0.00449984	0.0122641	0.00016676
4.08248	0.0138922	0.00232633	0.0217427	0.00873765	0.0122118	0.000149896
4.10284	0.0141919	0.00202026	0.0199674	0.00518435	0.0121425	0.000164777
4.12311	0.0137122	0.00201792	0.0190874	0.00416214	0.0120874	0.000161451
4.16333	0.0130655	0.00186988	0.01871	0.00487572	0.0119669	0.000155828
4.1833	0.0127032	0.00203725	0.0180092	0.00330512	0.0119029	0.000158906
4.20317	0.0127772	0.00163424	0.0178956	0.00329475	0.0118494	0.000158903
4.22295	0.0120994	0.00188116	0.0182948	0.00462334	0.011792	0.000150283
4.24264	0.0117606	0.00198134	0.0167671	0.00309672	0.0117435	0.000150623
4.26224	0.011385	0.00207262	0.016978	0.00479296	0.0116812	0.000155001
4.28174	0.0110885	0.00208739	0.0171192	0.00399044	0.0116262	0.000149498
4.33974	0.0105432	0.00154966	0.0164548	0.00522204	0.0114803	0.00014528
4.3589	0.0101483	0.00217001	0.0172264	0.00724566	0.0114111	0.000141288
4.37798	0.00979818	0.00206807	0.0151638	0.00291947	0.011371	0.000158497
4.39697	0.00949779	0.00212841	0.0145856	0.0024583	0.0113235	0.000144178
4.41588	0.0096363	0.00215799	0.0162684	0.0046519	0.0112881	0.000130026
4.43471	0.0098231	0.00187359	0.0161587	0.00508008	0.0112412	0.000127019
4.47214	0.00939697	0.00132458	0.0153571	0.00379195	0.011162	0.000140753
4.49073	0.00898174	0.00178624	0.0153312	0.00394982	0.0110932	0.000132329
4.50925	0.0087405	0.00195244	0.0133801	0.00198042	0.0110593	0.000137522
4.52769	0.0082964	0.00193032	0.0145117	0.00347684	0.0110287	0.000121912
4.56435	0.00822199	0.0011581	0.0132312	0.00227522	0.0109378	0.000127682
4.58258	0.00785251	0.00133488	0.0132659	0.0014758	0.0109135	0.00012167
4.6188	0.00640585	0.00376883	0.0166685	0.0123627	0.0108008	0.00012555
4.63681	0.00721608	0.0014554	0.0135416	0.00300554	0.0107783	0.000128804
4.65475	0.00698439	0.00213469	0.0140948	0.00574421	0.0107591	0.00010767
4.67262	0.00702456	0.00128757	0.0134023	0.00470587	0.0107099	0.000112434
4.69042	0.00737636	0.00209744	0.0128648	0.00457693	0.0106566	0.000131207
4.70815	0.00669608	0.00178967	0.0110056	0.00253098	0.0106098	0.000139137
4.72582	0.00700883	0.00145554	0.0127272	0.00409551	0.0105937	0.000123643
4.76095	0.00611955	0.00149863	0.0124169	0.00284675	0.0105065	0.000116478
4.77842	0.00627447	0.00152026	0.0118596	0.00179957	0.0105011	0.000113516
4.79583	0.00545671	0.00154394	0.01107	0.00182372	0.0104566	0.000119678
4.81318	0.00640292	0.00166094	0.0116349	0.00276556	0.010424	0.000125544
4.83046	0.00591763	0.00177865	0.0121579	0.00277533	0.0103941	0.000126928
4.84768	0.00601283	0.00143784	0.0107063	0.00236625	0.0103712	0.000131696
4.86484	0.00547616	0.00150193	0.0093749	0.0029329	0.0102929	0.000129462
4.89898	0.00578466	0.00104635	0.00766805	0.00593552	0.0102642	0.000128291
4.91596	0.00549078	0.00132628	0.00996858	0.00176675	0.0102511	0.000108989
4.93288	0.00525437	0.00103099	0.0103728	0.0022366	0.0102188	0.000109579
4.94975	0.00496444	0.00119684	0.0111389	0.00431693	0.0101963	0.000113572
4.96655	0.00487263	0.00171035	0.0104285	0.00262478	0.0102443	9.84289e-05
4.98331	0.00476812	0.00148335	0.0100983	0.00159478	0.0101247	9.63174e-05
5	0.00498504	0.00124324	0.010441	0.00302295	0.010097	0.000117552
5.03322	0.00485279	0.000868096	0.00910212	0.00166611	0.0100542	0.000115695
5.04975	0.00460209	0.000961683	0.00985838	0.00170896	0.0100065	0.000110867
5.06623	0.0045581	0.00120444	0.0101231	0.00174181	0.0100138	9.78653e-05
5.08265	0.00401911	0.000797371	0.00838641	0.00145854	0.00994548	0.000124571
5.11534	0.00437601	0.00104099	0.00985591	0.00350878	0.0099666	0.000104695
5.1316	0.00434956	0.0010661	0.0098881	0.00250767	0.00988048	0.000114902
5.16398	0.00251639	0.00178252	0.0111886	0.00745644	0.00990486	0.000105612
5.18009	0.00369995	0.00076137	0.00855261	0.00104347	0.00981346	0.000115554
5.19615	0.00363379	0.000896131	0.00788446	0.00094374	0.00977958	0.000114091
5.21217	0.00367954	0.00287355	0.00938574	0.00392207	0.00973496	0.000106805
5.22813	0.00348326	0.00112154	0.00857576	0.00284654	0.00975233	0.000100002
5.24404	0.00371927	0.00133091	0.00864839	0.00271607	0.00968942	0.000110285
5.25991	0.00343691	0.00111451	0.00771784	0.000998681	0.00966172	0.000118307
5.2915	0.00400837	0.00215468	0.00960522	0.00287466	0.00962192	0.000110284
5.30723	0.00337395	0.00105859	0.00817963	0.00292622	0.00969687	0.000112861
5.32291	0.00309024	0.00105579	0.00809047	0.00248641	0.00964065	9.79854e-05
5.33854	0.00343532	0.000615033	0.00765766	0.00129112	0.00961198	9.76788e-05
5.35413	0.00282907	0.00228287	0.00511269	0.00465616	0.00951408	0.000128482
5.36967	0.00309549	0.000659953	0.00792832	0.00132849	0.00957001	0.000108344
5.38516	0.00291988	0.000585353	0.00759893	0.000647001	0.00956257	9.35229e-05
5.41603	0.00315709	0.00211759	0.00742828	0.00192065	0.00952396	0.000118397
5.43139	0.00228514	0.00130659	0.00650891	0.00185094	0.00950638	9.29931e-05
5.44671	0.00276739	0.000757346	0.00729759	0.00171329	0.00949365	0.000104489
5.46199	0.00246313	0.000549802	0.00754766	0.00128376	0.00946461	9.44565e-05
5.47723	0.00257787	0.00099007	0.006803	0.00161352	0.00938876	0.000113472
5.49242	0.00221914	0.00115815	0.00711145	0.0024573	0.00936767	0.000107539
5.50757	0.00249655	0.000334993	0.00726778	0.00200884	0.00939984	9.77044e-05
5.53775	0.00255538	0.000976923	0.00759291	0.00194479	0.00936232	0.000115905
5.55278	0.00243343	0.000725649	0.00730345	0.00158236	0.0093075	9.96934e-05
5.56776	0.00226464	0.00074127	0.00748194	0.00192552	0.00932495	9.65801e-05
5.58271	0.00220484	0.00126216	0.00740333	0.00223227	0.0093173	0.000101852
5.61249	0.00212839	0.000907605	0.00673287	0.000624071	0.0092606	0.000103592
5.62731	0.00278798	0.00192689	0.00696864	0.00149308	0.00918452	0.00011995
5.65685	0.00172248	0.00145885	0.00370767	0.00556554	0.0090971	0.000195898
5.67157	0.00201841	0.000713476	0.00555647	0.00113204	0.00915709	0.000103326
5.68624	0.00196629	0.000544294	0.0059189	0.000975465	0.00917392	0.000100993
5.70088	0.00159226	0.00106217	0.00657766	0.0020905	0.00917869	0.000102558
5.71548	0.00135015	0.000965239	0.00550909	0.00370932	0.00916648	0.000111581
5.73004	0.00199015	0.000963245	0.00638928	0.000953723	0.00915851	9.69382e-05
5.74456	0.00139562	0.00119961	0.00661167	0.00167776	0.00917057	9.4645e-05
5.7735	0.00151706	0.00104647	0.00562294	0.00143276	0.00910521	9.80752e-05
5.78792	0.00178589	0.000865026	0.00667502	0.00172175	0.00915028	8.70028e-05
5.8023	0.00187534	0.000625577	0.00571948	0.00123391	0.0090279	0.000102093
5.81664	0.00168834	0.000603998	0.00742363	0.00383724	0.00905493	9.31034e-05
5.83095	0.00182769	0.00137915	0.00804475	0.00516975	0.00913459	8.69854e-05
5.84523	0.0019382	0.00114444	0.00578021	0.00135906	0.00908048	0.000103355
5.85947	0.00174829	0.000646295	0.0061927	0.00212122	0.00901783	9.60819e-05
5.88784	0.00215459	0.00222287	0.00597869	0.00246571	0.00894603	8.29093e-05
5.90198	0.00169522	0.000612582	0.00572214	0.0011497	0.00898888	9.37042e-05
5.91608	0.00159191	0.000888191	0.0045181	0.00220428	0.00893144	0.000105125
5.93015	0.00142033	0.000882975	0.00537694	0.0010474	0.00885023	0.000133085
5.94418	0.0021034	0.000697793	0.00628144	0.00245398	0.00897225	8.82646e-05
5.95819	0.00136612	0.000619014	0.00521167	0.00171102	0.00895717	9.81676e-05
5.97216	0.00141648	0.00108675	0.00525604	0.00181861	0.00899816	0.000104463
6	0.00154634	0.000625531	0.00622311	0.00177439	0.00894339	9.47922e-05
6.01387	0.0014576	0.000995637	0.00461563	0.00181788	0.00877931	0.00013117
6.02771	0.00187397	0.000760784	0.00417965	0.0023224	0.00879933	0.000113493
6.04152	0.00142866	0.000953767	0.00464556	0.00125779	0.00882396	9.82128e-05
6.06905	0.00118374	0.00066982	0.00517311	0.000869887	0.00885186	8.99248e-05
6.08276	0.00170795	0.000739232	0.0065887	0.00403617	0.00884534	9.31647e-05
6.1101	0.00142455	0.00117466	0.00335414	0.00387664	0.0087212	0.00011616
6.12372	0.00129188	0.000639538	0.00600806	0.00219402	0.0087952	8.75867e-05
6.13732	0.000662685	0.00147117	0.0052531	0.00243014	0.00882338	8.87849e-05
6.15088	0.00135773	0.000919827	0.0041453	0.00108735	0.0088072	9.74577e-05
6.16441	0.000667594	0.000679203	0.00448808	0.00164969	0.00874068	0.000115633
6.17792	0.00120641	0.00049873	0.00502629	0.00101148	0.00876054	8.72087e-05
6.19139	0.000959646	0.000602687	0.00509428	0.0009662	0.00879102	9.38069e-05
6.21825	0.00199389	0.00226712	0.00627816	0.0054739	0.00883519	0.000115039
6.23164	0.00166582	0.000871322	0.00540125	0.00266278	0.00877265	9.01005e-05
6.245	0.00141963	0.000547681	0.00419327	0.00106415	0.00867036	9.66824e-05
6.25833	0.00136396	0.00114494	0.00798165	0.00716033	0.00908158	0.000148365
6.27163	0.00153167	0.00155815	0.00438001	0.00331801	0.00868983	0.000104723
6.2849	0.00174639	0.00110371	0.0047688	0.00124741	0.00865036	9.8494e-05
6.29815	0.00148111	0.000387837	0.0052727	0.00226725	0.00876615	8.90939e-05
6.33772	0.00147623	0.0010336	0.00406546	0.00140945	0.0086717	9.76313e-05
6.35085	0.00168547	0.0012827	0.00486607	0.00126972	0.0086908	8.46248e-05
6.36396	0.00104568	0.00112466	0.00455669	0.00171657	0.00862729	9.74845e-05
6.37704	0.00113731	0.000978376	0.00205803	0.00480508	0.0084794	0.000128861
6.3901	0.00115733	0.000555472	0.00509947	0.00294369	0.00861643	9.64744e-05
6.40312	0.00147762	0.00104904	0.0045282	0.001259	0.00855432	0.00010948
6.4291	0.00152353	0.00120798	0.00421905	0.00108644	0.0085461	9.44115e-05
6.44205	0.00132129	0.00139956	0.00280883	0.00213544	0.00849166	0.000122028
6.45497	0.0014859	0.00104492	0.00521737	0.00209332	0.008646	8.25821e-05
6.46787	0.00136046	0.000881374	0.00464691	0.00307038	0.00853571	9.62719e-05
6.49359	0.00162687	0.0013629	0.00494541	0.00291724	0.0084239	0.000128935
6.50641	0.00157875	0.00178002	0.00380725	0.000962149	0.00855431	9.04067e-05
6.53197	-0.000978012	0.0043743	0.0056705	0.0052242	0.00921369	0.0001298
6.54472	0.00092789	0.00101483	0.0032029	0.00220802	0.00849073	0.0001208
6.55744	0.00078956	0.00113575	0.00368614	0.00118778	0.00850048	0.000119489
6.57013	0.00176957	0.00184002	0.00430791	0.00141487	0.00856081	8.32529e-05
6.58281	0.00146517	0.000765738	0.00455699	0.00280891	0.00850747	0.000103316
6.59545	0.00127824	0.00114848	0.00397368	0.000723761	0.00854092	9.35851e-05
6.60808	0.00123086	0.00147889	0.00492019	0.00469088	0.00853328	0.000120894
6.63325	0.00161275	0.00174024	0.00372549	0.0011611	0.00847575	0.00010731
6.6458	0.00131405	0.0014465	0.00476428	0.00334128	0.00860471	8.89193e-05
6.65833	0.000799995	0.00105396	0.00442832	0.00125212	0.00844862	0.00010862
6.67083	0.000689334	0.000780114	0.00189707	0.00407706	0.00828771	0.000175309
6.68331	0.00166232	0.00293034	0.00302348	0.00542997	0.00841571	0.000142991
6.69577	0.00103403	0.000879721	0.00343356	0.00153007	0.00838018	0.00011662
6.7082	0.00129991	0.00148869	0.002957	0.00154436	0.00837106	0.000120082
6.733	0.000952112	0.0010923	0.00334485	0.00140881	0.00842442	0.000116955
6.74537	0.00172189	0.00118275	0.00517846	0.00443238	0.00849841	7.50794e-05
6.75771	0.00101144	0.00101527	0.00422701	0.00203571	0.00833565	0.000125289
6.77003	0.00168654	0.00209262	0.00361555	0.000915923	0.00841351	0.000107399
6.78233	0.00131745	0.00171711	0.00401642	0.00145415	0.00851136	9.02483e-05
6.79461	0.00148661	0.00226376	0.00379646	0.000753929	0.00844636	8.99834e-05
6.80686	0.00178117	0.00189286	0.003792	0.00198412	0.00833051	0.000108695
6.8313	0.000685951	0.000910763	0.00269684	0.00218566	0.00816039	0.000195287
6.84349	0.00137278	0.00140931	0.00439918	0.00217536	0.00834095	0.00012618
6.85565	0.000928481	0.000891946	0.00221818	0.00298447	0.00836066	0.000116688
6.8678	0.00125207	0.00174636	0.00370858	0.000784532	0.00831906	0.000129761
6.89202	0.00115915	0.00110405	0.0034845	0.000929329	0.00825607	0.000149986
6.90411	0.00140139	0.00195411	0.00205668	0.00406319	0.0082735	0.000135837
6.9282	0.00055703	0.00167225	0.00351316	0.00228134	0.00844215	8.43627e-05
6.94022	0.000958952	0.000690236	0.0029591	0.00186884	0.00816896	0.000156004
6.95222	0.0016416	0.00160212	0.00345881	0.00102198	0.00832555	0.000111572
6.96419	0.000616734	0.000838741	0.00353617	0.00267182	0.00814545	0.000174016
6.97615	0.000432395	0.00192147	0.0046741	0.00576817	0.00832212	0.000113337
6.98809	0.00174457	0.00185249	0.00300946	0.00123064	0.00825599	0.000122767
7	0.000754987	0.0014696	0.0035104	0.00164545	0.00814676	0.000168972
7.02377	0.00110413	0.00126565	0.00302361	0.00212534	0.00827941	0.00012633
7.03562	0.000855261	0.00137037	0.00302909	0.00189816	0.008244	0.000133242
7.04746	0.00207882	0.00305079	0.00256752	0.00336211	0.00829376	0.000102223
7.05927	0.000763907	0.00131917	0.0024422	0.00231644	0.00815132	0.000163937
7.07107	0.00141107	0.00197168	0.0027578	0.00175313	0.00814991	0.000152344
7.08284	0.00108834	0.00114179	0.00290105	0.00180048	0.00819802	0.000150768
7.0946	0.00029722	0.000898371	0.00370897	0.00202713	0.0080528	0.000221308
7.11805	-0.000190388	0.00189022	0.00646177	0.00781113	0.00807276	0.000189725
7.12975	0.00133452	0.00136826	0.00288281	0.00126223	0.00816062	0.0001457
7.14143	0.00134367	0.00162506	0.00383759	0.00282512	0.00815654	0.000153174
7.15309	0.00180316	0.00222552	0.00243626	0.00239792	0.00824414	0.000101331
7.16473	0.000939693	0.00118362	0.00247202	0.00138319	0.00811374	0.000178991
7.17635	0.0014582	0.0011362	0.00219734	0.00364982	0.00817889	0.000148984
7.18795	0.00166133	0.00224426	0.00234557	0.00319093	0.00821135	0.000132819
7.2111	0.00106133	0.00184465	0.00301616	0.00152892	0.00808113	0.000160564
7.22265	0.000418583	0.00161488	0.00217396	0.00310647	0.0080394	0.00019897
7.23418	0.000610621	0.000805371	0.00233551	0.00237919	0.00806755	0.000181421
7.24569	0.000932414	0.00135136	0.00343272	0.00153698	0.00808562	0.000161781
7.26865	1.22951e-05	0.00182755	0.0027951	0.00204662	0.00814991	0.000166991
7.28011	0.000406618	0.000934838	0.00172827	0.00285115	0.00801089	0.000205053
7.30297	0.00275406	0.00382311	0.00137104	0.00308007	0.00834434	8.84613e-05
7.31437	0.000999908	0.00145434	0.00283038	0.00136383	0.0081018	0.000165828
7.32575	0.000303683	0.00157912	0.00332174	0.00119429	0.00806665	0.000163391
7.33712	0.000745058	0.00109012	0.0021432	0.0013923	0.00798529	0.000238878
7.34847	0.00132593	0.000946387	0.0016756	0.00337225	0.00805135	0.00016893
7.3598	0.000748002	0.0007659	0.00228042	0.00221695	0.00800689	0.000209751
7.37111	0.000849572	0.000759766	0.0025214	0.00152799	0.00800488	0.000191487
7.39369	0.000812236	0.00250598	-0.000953085	0.0154884	0.00828543	0.000146837
7.40495	0.000848255	0.00126477	0.00364416	0.00314185	0.00801096	0.00018197
7.4162	0.00103718	0.00311487	0.00136755	0.00896535	0.00826213	0.000137487
7.42743	0.000528463	0.00150176	0.00238573	0.00319517	0.00797676	0.000192969
7.43864	0.000749381	0.00139735	0.00277776	0.00276412	0.00792763	0.000216539
7.44983	0.000576906	0.000550469	0.00309253	0.00127562	0.00790517	0.000213104
7.46101	0.00100925	0.0022929	0.00356735	0.00219913	0.00806645	0.000159091
7.48331	0.00166705	0.00251827	0.00297614	0.00537247	0.00820375	0.000123727
7.49444	0.00150464	0.00247827	0.00157647	0.00137067	0.0079603	0.000188856
7.50555	0.000815252	0.000757892	0.00233621	0.00235048	0.0079982	0.000193184
7.51665	0.000237078	0.000732038	0.0017835	0.00160454	0.00788311	0.000236719
7.52773	-0.00036453	0.00140711	0.00120205	0.00224768	0.00801767	0.000238813
7.53879	0.000537323	0.00117576	0.00149675	0.004959	0.00801019	0.000191592
7.54983	0.000326527	0.00112142	0.00282348	0.00188919	0.00791927	0.000225005
7.57188	-9.14661e-05	0.00105003	0.00219436	0.00284627	0.00791354	0.000244723
7.58288	0.000856966	0.00121719	0.00161112	0.00591874	0.00793763	0.000211483
7.59386	0.000564919	0.00112196	0.00256158	0.00248419	0.00792687	0.00022958
7.60482	-6.14569e-05	0.00117143	0.00327589	0.00305006	0.00800429	0.000202706
7.62671	0.000306233	0.00101534	0.00292445	0.00139301	0.00788611	0.00022011
7.63763	0.000492451	0.000925056	0.00276778	0.00182084	0.00790374	0.000217878
7.65942	0.00154855	0.00234349	0.00268368	0.0038888	0.00774418	0.000276675
7.67029	0.000699255	0.000699227	0.0026621	0.00331012	0.00791033	0.000209105
7.68115	0.000458622	0.000684465	0.00314248	0.00139964	0.00783095	0.00023728
7.69199	0.000849198	0.00130092	0.00347504	0.00268556	0.0079267	0.000218342
7.70281	0.000717398	0.00141959	0.00270549	0.0025464	0.00797402	0.000191528
7.71362	0.000989208	0.00169564	0.00160949	0.00341433	0.00810994	0.000145064
7.72442	0.000382018	0.00112787	0.000800457	0.00651306	0.00774611	0.000256192
7.74597	0.000842134	0.000931798	0.001573	0.00350365	0.00785879	0.000221559
7.75672	0.000556677	0.00181344	0.00261725	0.00392172	0.00786713	0.000221571
7.76745	0.000771679	0.00124122	0.00310697	0.00161626	0.00787443	0.000214443
7.77817	-1.99543e-05	0.00115438	0.00406779	0.00283931	0.00778475	0.000255314
7.79957	0.000139795	0.000759463	0.00238721	0.00169226	0.00783368	0.000253746
7.81025	-0.000437473	0.00112261	0.00138557	0.00359437	0.00784461	0.000256143
7.84219	-7.10635e-05	0.000664086	0.00201518	0.00259603	0.00784977	0.000259921
7.85281	0.000478919	0.000963376	0.00173081	0.00443076	0.00787031	0.000251905
7.86342	0.000540643	0.000662167	0.00227834	0.0025984	0.00776527	0.000253486
7.87401	0.000647985	0.00225863	0.00284379	0.00420337	0.0079914	0.000174027
7.88458	0.000308129	0.00150348	0.0029937	0.0032113	0.00794305	0.000228212
7.89515	0.000112643	0.000949155	0.00262622	0.00245555	0.00781059	0.000239872
7.91623	0.000555339	0.000811422	0.00339991	0.0018333	0.00776003	0.000245797
7.92675	0.000636797	0.000619228	0.00140282	0.00150635	0.00771034	0.000273656
7.93725	0.000454396	0.0019543	0.00371999	0.00295779	0.00794155	0.000218036
7.96869	0.00023979	0.000852527	0.00321502	0.00231778	0.00781792	0.000230654
7.97914	0.000857583	0.00125538	0.00282997	0.00447425	0.00778467	0.000232197
8	0.00154153	0.00198622	0.00196006	0.00562942	0.00785756	0.000239146
8.01041	0.000365351	0.0019225	0.00464901	0.00360848	0.00784916	0.000219736
8.02081	0.000602058	0.000961177	0.00241288	0.00232822	0.00780343	0.000265422
8.03119	0.000840682	0.000840817	0.00210352	0.00314128	0.00768165	0.000265163
8.04156	0.000261736	0.00181969	0.00128019	0.00257379	0.00759087	0.000354639
8.05191	0.000642585	0.00145395	0.00243927	0.00265511	0.00768813	0.000267299
8.06226	-3.42393e-05	0.000699241	0.00305483	0.00288973	0.00767867	0.0002843
8.0829	-0.00027498	0.00253612	0.00089289	0.00837053	0.00786165	0.000242946
8.09321	-0.00058425	0.00224297	0.00132283	0.00433788	0.00789633	0.00024087
8.1035	0.000222088	0.000761314	0.00229578	0.0022045	0.00773332	0.000275619
8.11377	-0.000633119	0.00130969	0.000746376	0.00604269	0.00779879	0.000266354
8.12404	-0.000236074	0.00085187	0.00109694	0.00406002	0.00773043	0.000286608
8.14453	-0.000299261	0.000782975	0.00195025	0.00304021	0.0077362	0.000282108
8.16497	-0.000966852	0.00205099	0.00229896	0.00256388	0.00795057	0.000252831
8.17517	0.000212338	0.000757243	0.00279374	0.00226605	0.00778087	0.00025564
8.18535	0.000855672	0.00111573	0.00241299	0.00187391	0.0077252	0.000253102
8.19553	-1.37753e-05	0.00251025	0.00409198	0.00320008	0.0078355	0.000247654
8.20569	0.000502038	0.000491596	0.00179104	0.00293432	0.00771399	0.000274977
8.21584	0.000972651	0.00132736	0.00201071	0.00535508	0.00772926	0.000252803
8.22598	0.000989016	0.00129347	0.000403165	0.00752734	0.0076129	0.000287344
8.24621	-0.000789132	0.00108991	0.00502425	0.00667504	0.00776974	0.000247361
8.25631	0.00069001	0.00282477	0.00268516	0.0027771	0.00770513	0.000302582
8.2664	0.000261273	0.000921808	0.00318374	0.00324414	0.0077039	0.000258559
8.27647	7.13957e-05	0.00254304	0.000829053	0.00277608	0.00753144	0.000376238
8.29659	0.000326217	0.00120431	0.00149691	0.00257723	0.00760454	0.000316146
8.30662	0.000644803	0.000706485	0.00306517	0.00314509	0.00762144	0.000280832
8.32666	0.00066911	0.00222684	0.00518802	0.00293461	0.00783432	0.000221869
8.33667	0.000448163	0.00125321	0.00168423	0.00288583	0.00759535	0.000309344
8.34666	0.000865931	0.00136861	0.00105812	0.00605337	0.00764186	0.000266112
8.35663	0.000589597	0.000589259	0.00375953	0.00375203	0.00765811	0.000276849
8.3666	0.00125108	0.00248398	0.00148717	0.00518338	0.00766808	0.000276107
8.37655	-0.000156646	0.000996209	-0.000215436	0.00440877	0.00764221	0.000315594
8.3865	-0.00164272	0.00201863	-0.00132564	0.00708584	0.00784241	0.000297038
8.41625	-0.00055772	0.0014987	0.00152399	0.00427145	0.00775493	0.000275344
8.42615	-0.000399372	0.00153907	0.000746935	0.0061679	0.00777979	0.000266405
8.43603	0.00055242	0.00182783	0.00100707	0.00413255	0.00755437	0.000310612
8.44591	0.000421733	0.00117475	0.00428195	0.00361482	0.0076433	0.000282662
8.45577	0.000382525	0.00112662	0.00199231	0.00234329	0.00765179	0.000294658
8.46562	0.000104397	0.00129117	0.00293786	0.00317507	0.00771623	0.000271549
8.48528	0.000947046	0.00436127	0.00132777	0.00464021	0.00745908	0.000422277
8.4951	0.000445574	0.00205525	0.00171302	0.00388995	0.00756351	0.000290602
8.5049	0.000258767	0.00279658	0.00209158	0.00273287	0.00758469	0.000348577
8.52447	0.0011716	0.00102528	0.00153301	0.00609663	0.00769784	0.00025163
8.53424	0.000242194	0.000943607	0.0030616	0.00288732	0.00768682	0.000267529
8.544	0.000183239	0.00201613	0.000291673	0.00307237	0.0074747	0.000379105
8.56349	0.000552651	0.00169418	0.000902014	0.00253656	0.00747731	0.000370327
8.57321	0.00040606	0.00114048	0.00272054	0.00272828	0.00764717	0.000272226
8.59263	0.000874356	0.00144287	0.00224166	0.00298513	0.00757737	0.00028632
8.62168	0.000790264	0.000861316	0.00184511	0.00249011	0.00755102	0.000317644
8.65063	0.000656564	0.00136482	8.74703e-05	0.00783627	0.00762129	0.00026514
8.66025	0.000354062	0.000789873	0.00119452	0.00319805	0.00759971	0.000296348
8.66987	-0.00205083	0.00308892	-0.00249599	0.0064811	0.00779977	0.000304139
8.67948	-0.00184316	0.00213396	-0.00331446	0.00885287	0.00783109	0.000298423
8.68907	-0.00182816	0.00231023	-0.00105328	0.00688598	0.00782451	0.00029807
8.69866	-0.00171495	0.00261478	0.00135875	0.00294429	0.00777447	0.000300357
8.7178	0.000181009	0.00116957	0.00143667	0.00258198	0.00762483	0.000304734
8.72735	0.000637107	0.00198069	0.00335237	0.00423362	0.0075409	0.000336055
8.73689	0.000916471	0.00157359	0.0015507	0.00262376	0.00751568	0.000311094
8.74643	-0.00047288	0.00158828	0.00187849	0.00317906	0.00757493	0.000350256
8.76546	0.000379708	0.0016206	0.00151725	0.00277085	0.00756242	0.000336178
8.79394	0.000440716	0.00224178	0.000676125	0.00563473	0.0075459	0.000289794
8.80341	9.57684e-05	0.00114135	0.000154606	0.00324599	0.00742088	0.000392638
8.81287	0.000207926	0.00175623	0.00431517	0.00527428	0.00769801	0.000280299
8.82232	0.000542008	0.00290944	-0.000570294	0.00407667	0.00744481	0.000377407
8.83176	0.0001367	0.00179247	0.00522078	0.00616729	0.00772063	0.000266813
8.84119	0.000964488	0.00211233	0.000213993	0.00458635	0.0074419	0.000368304
8.85061	0.000782323	0.00132655	0.0033734	0.00392164	0.00752816	0.000309254
8.87881	0.00139266	0.000942022	0.00194397	0.00253429	0.0074368	0.000370698
8.88819	0.00123743	0.00164508	0.00185968	0.00406522	0.00756071	0.000285468
8.89757	0.000871324	0.00114093	0.00280004	0.00325524	0.00750985	0.000329213
8.91628	0.000771978	0.00103429	0.00200799	0.00348561	0.00756918	0.000302734
8.95358	-0.000278001	0.00125205	-0.00173804	0.00842332	0.00758175	0.000311173
8.96289	-0.000943695	0.00315166	-0.000679904	0.00341518	0.007573	0.000377344
8.98146	0.000694735	0.00327958	0.000307702	0.00493655	0.0073753	0.000457137
8.99074	0.00039891	0.00134458	0.00233189	0.00244028	0.00755706	0.000323279
9	0.000279381	0.00149195	0.00075784	0.00260999	0.00743949	0.000390566
9.0185	0.000828832	0.00142301	0.00426079	0.00408297	0.00758932	0.000290072
9.02774	0.00124734	0.00142288	0.00176072	0.002408	0.0074894	0.000309559
9.03696	0.00010153	0.00184154	0.000635904	0.00338721	0.00750231	0.000365845
9.05539	4.51152e-05	0.00136336	-0.000275067	0.00362049	0.00737867	0.000408281
9.07377	0.000407378	0.00145597	0.000399677	0.00251702	0.00739166	0.000395781
9.10128	7.69392e-05	0.00234873	0.00432388	0.00662077	0.00768094	0.000288161
9.11043	0.000873504	0.0029609	-0.00130068	0.00676192	0.00742786	0.000375502
9.11958	0.000688446	0.00218679	0.00510722	0.00787536	0.00749769	0.000325307
9.12871	0.0011348	0.00196687	-0.0013394	0.00810528	0.00742698	0.000367327
9.13783	0.000821269	0.00175781	0.00298709	0.00438647	0.00751285	0.000308687
9.14695	0.00124831	0.00142441	0.00233713	0.00341102	0.00740583	0.000377762
9.18332	0.00059306	0.00133842	0.00353007	0.00475559	0.007529	0.000320446
9.19239	-0.000404372	0.00423524	0.00270783	0.0107254	0.00732333	0.000516515
9.2105	0.000549634	0.00313826	0.00040999	0.00534889	0.00733099	0.000489056
9.2376	-0.00188673	0.00499749	-0.00482608	0.0134323	0.00776887	0.000297172
9.24662	-7.82492e-05	0.00188479	-0.000755919	0.00457512	0.00738809	0.000435585
9.25563	0.000695975	0.00247863	0.00509583	0.0108437	0.0074294	0.000359938
9.26463	-0.000128205	0.00190956	-0.00113731	0.00479727	0.00734512	0.000440975
9.27362	0.000606437	0.00159022	0.00301486	0.00301151	0.0075033	0.000327499
9.2826	0.000747742	0.00217471	0.00518098	0.00736422	0.00756449	0.000312471
9.31844	0.000301199	0.00137302	-0.000110704	0.0042722	0.00738922	0.000401765
9.35414	0.000598255	0.00205567	0.000367616	0.00289692	0.00738004	0.000397505
9.38083	-0.000622505	0.0033298	0.0063012	0.00835981	0.00766275	0.000296032
9.39858	0.000395916	0.00289848	0.00574565	0.0110578	0.00748645	0.000329515
9.40744	0.00132349	0.00225807	0.00393274	0.00802249	0.00738231	0.000394543
9.42514	0.000876707	0.00197015	0.0026729	0.00379276	0.0073931	0.000376202
9.43398	6.59458e-06	0.00289452	0.000999858	0.00843598	0.00729228	0.000537869
9.45163	0.000276504	0.00167676	0.00129092	0.00671848	0.00729725	0.00050893
9.46044	0.000482176	0.00328152	0.0054932	0.00803693	0.00762194	0.000317135
9.46925	5.00783e-05	0.00217117	-0.00165174	0.00626943	0.00730834	0.0004927
9.50438	-8.12784e-05	0.00127787	-0.000173868	0.00476223	0.0073091	0.000463504
9.5219	-0.000316686	0.00221674	-0.0012607	0.00715404	0.00733669	0.000459009
9.53065	0.000163115	0.00267012	0.0054537	0.0106656	0.00742064	0.000362593
9.53939	0.000175163	0.00204159	-0.0013262	0.00583783	0.00733486	0.000439703
9.55685	0.00114012	0.00341033	0.00622895	0.0106538	0.00756052	0.000324571
9.57427	0.00101978	0.0017886	0.000756486	0.00403252	0.00733283	0.000432292
9.59166	0.000316902	0.00211039	0.00121623	0.0035055	0.00734624	0.000418304
9.66954	0.000280088	0.00213483	0.00253611	0.0100632	0.00730455	0.00051809
9.67815	0.000757856	0.00228719	0.0044214	0.00898886	0.00737512	0.000398469
9.68676	0.000164307	0.00170176	-0.000912195	0.00656807	0.00727441	0.000543142
9.70395	0.000110575	0.00128539	7.11403e-05	0.00661068	0.00727417	0.000517171
9.73824	8.85818e-05	0.00195229	-0.000867612	0.00652579	0.00730034	0.000493727
9.75534	-7.29287e-05	0.00187115	-1.42689e-05	0.00545176	0.00728457	0.000478652
9.77241	0.000409809	0.0016952	-0.000848001	0.00588327	0.00729996	0.000465144
9.79796	-0.000245387	0.00411178	0.00621175	0.0158126	0.00741266	0.00037264
9.84039	0.000518381	0.00199763	0.00175907	0.00489391	0.00732436	0.000439035
9.89949	0.000244145	0.00226128	0.00137253	0.00991562	0.00723818	0.00060408
9.91632	0.000520138	0.001232	0.00105379	0.00828706	0.00724763	0.000579108
9.9415	0.000643746	0.00328017	0.00579609	0.0115455	0.00736961	0.000407262
9.94987	6.40494e-05	0.00163408	-0.000117167	0.00736853	0.00725551	0.000534061
9.96661	0.000272895	0.00125744	-3.79553e-05	0.00714202	0.00726627	0.000522753
10.0167	9.92333e-05	0.00172727	-0.00046255	0.00589448	0.00727683	0.000484652
10.0995	0.000770898	0.0027089	0.00349896	0.00766626	0.00731757	0.000452372
10.1407	0.000684708	0.00168098	0.00207752	0.0111194	0.00723198	0.000626677
10.1571	0.000518168	0.00119661	0.00161103	0.00946093	0.00723286	0.000597644
10.1735	0.000301726	0.000916013	0.000294195	0.00749674	0.00724392	0.000585281
10.2062	-5.33049e-05	0.00190733	0.00103656	0.00862177	0.00724016	0.000533601
10.2713	-0.000225287	0.00268136	-0.000556852	0.00675025	0.00726749	0.000493103
10.3763	0.0007155	0.00237905	0.00196275	0.0110485	0.00722753	0.000656018
10.3923	0.000878808	0.00150699	0.00138578	0.00774663	0.00722979	0.000632347
10.4083	0.000438181	0.00115665	0.00107803	0.00941373	0.00722892	0.000604798
10.4563	0.000144879	0.00258206	0.00168054	0.0100247	0.00723238	0.000533818
10.6066	0.000939053	0.00402319	0.00229376	0.011574	0.00722974	0.000695877
10.6223	0.00104323	0.00300481	0.00170115	0.0104989	0.00722691	0.000666898
10.6536	0.000414376	0.00135341	3.74228e-05	0.0099414	0.00722309	0.000609514
10.8474	0.0015227	0.00558345	0.00311676	0.013907	0.00723186	0.000706278
10.8628	0.00108231	0.00409226	0.00100962	0.00834853	0.00722807	0.000682433
11.083	0.00132517	0.00630374	0.00467434	0.0161938	0.00723998	0.000718197
11.3137	0.00118778	0.0083398	0.0046572	0.0226411	0.00724653	0.00071565
