# Supplementary material for: Electrostatics of salt-dependent reentrant phase behaviors highlights diverse roles of ATP in biomolecular condensates
Source: eLife. 2025 Mar 3;13:RP100284. doi: 10.7554/eLife.100284 (PMC11875540; doi:10.7554/eLife.100284)
Supplement: Figure 1—source data 1. [file elife-100284-fig1-data1.xlsx]

## Sheet: Figure1C
C	Theory								Experiment - [NaCl] = 100mM
	[NaCl] = 100mM		[NaCl] = 300mM		[NaCl] = 500mM				Temperature(°C)	[DP] (mg/ml)	SD	[CP] (mg/ml)	SD.1
	[Caprin1](mg/ml)	Temperature(°C)	[Caprin1](mg/ml)	Temperature(°C)	[Caprin1](mg/ml)	Temperature(°C)			5	6.3407	0.16304	346.502	4.52914
	6.60122e-09	-55.7526	5.3163e-09	-51.337	4.27617e-09	-51.337			10	11.556	0.215396	281.888	7.64947
	6.82503e-08	-54.8836	7.61821e-09	-50.4323	2.34645e-08	-50.4323			15	24.0563	2.04163	242.303	4.88075
	5.7958e-08	-54.0077	3.74901e-08	-49.5201	1.72912e-08	-49.5201
	6.80548e-08	-53.1246	3.52951e-08	-48.6004	2.68615e-08	-48.6004
	1.05169e-05	-52.2344	5.35229e-08	-47.6732	7.91412e-08	-47.6732			Experiment - [NaCl] = 300mM
	5.99926e-07	-51.337	1.02616e-07	-46.7382	8.1475e-08	-46.7382			Temperature(°C)	[DP] (mg/ml)	SD	[CP] (mg/ml)	SD.1
	2.54151e-07	-50.4323	1.51433e-07	-45.7954	8.51561e-07	-45.7954			10	4.25317	1.33441	395.317	3.46488
	8.26113e-07	-49.5201	1.99155e-07	-44.8448	3.70912e-07	-44.8448			15	6.4543	1.23511	379.696	11.2212
	9.72152e-07	-48.6004	2.45356e-07	-43.8862	3.92563e-07	-43.8862			25	10.4021	0.344188	337.449	6.65844
	1.83473e-06	-47.6732	8.06151e-07	-42.9194	5.41039e-07	-42.9194			30	14.3713	0.814921	299.816	3.49205
	1.3753e-05	-46.7382	1.40819e-06	-41.9445	9.73397e-07	-41.9445			35	23.9498	1.12239	246.208	12.5607
	3.76959e-06	-45.7954	2.51371e-06	-40.9613	2.22617e-06	-40.9613			40	33.4715	2.33891	219.049	19.9919
	1.91256e-05	-44.8448	3.8809e-06	-39.9697	3.06595e-06	-39.9697
	1.89172e-05	-43.8862	6.92425e-06	-38.9696	4.7088e-06	-38.9696
	1.85768e-06	-42.9194	1.06953e-05	-37.9608	1.20752e-05	-36.9433			Experiment - [NaCl] = 500mM
	5.0383e-05	-41.9445	1.50947e-05	-36.9433	1.90988e-05	-35.917			Temperature(°C)	[DP] (mg/ml)	SD	[CP] (mg/ml)	SD.1
	0.000134261	-40.9613	4.37932e-05	-35.917	3.07977e-05	-34.8817			10	1.91002	0.387153	426.027	13.8459
	0.000190423	-39.9697	4.56755e-05	-34.8817	4.69488e-05	-33.8373			20	4.62949	0.870318	353.07	67.8578
	0.000220203	-38.9696	7.07619e-05	-33.8373	7.26574e-05	-32.7837			30	10.0223	2.10358	321.65	82.589
	0.000502895	-37.9608	0.000118266	-32.7837	0.000128011	-31.7208			40	15.55	2.07084	264.314	37.8898
	0.000819863	-36.9433	0.000169532	-31.7208	0.000182893	-30.6485			50	32.7472	0.130153	238.575	7.45546
	0.00136301	-35.917	0.000378859	-30.6485	0.000261433	-29.5666
	0.00234435	-34.8817	0.000418704	-29.5666	0.00038321	-28.4749
	0.00366394	-33.8373	0.000649593	-28.4749	0.00057035	-27.3735
	0.00588771	-32.7837	0.000903998	-27.3735	0.000836542	-26.262
	0.00947296	-31.7208	0.00145192	-26.262	0.00123897	-25.1405
	0.0150026	-30.6485	0.00216799	-25.1405	0.00180121	-24.0087
	0.0235084	-29.5666	0.00320651	-24.0087	0.0026069	-22.8665
	0.0364568	-28.4749	0.00470986	-22.8665	0.00373741	-21.7139
	0.0557475	-27.3735	0.00687154	-21.7139	0.00532429	-20.5505
	0.0841644	-26.262	0.00988584	-20.5505	0.00756951	-19.3763
	0.12531	-25.1405	0.0138005	-19.3763	0.0105818	-18.1912
	0.180008	-24.0087	0.0199493	-18.1912	0.0147417	-16.9949
	0.263805	-22.8665	0.0293159	-16.9949	0.0202953	-15.7873
	0.370936	-21.7139	0.0396197	-15.7873	0.0280148	-14.5683
	0.512948	-20.5505	0.0547892	-14.5683	0.0382225	-13.3377
	0.692408	-19.3763	0.0752048	-13.3377	0.0518165	-12.0953
	0.914601	-18.1912	0.102816	-12.0953	0.0693853	-10.8409
	1.18317	-16.9949	0.137721	-10.8409	0.0923789	-9.57443
	1.50146	-15.7873	0.18356	-9.57443	0.12245	-8.29567
	1.8722	-14.5683	0.242065	-8.29567	0.159434	-7.00443
	2.29849	-13.3377	0.315665	-7.00443	0.2075	-5.70053
	2.78335	-12.0953	0.406987	-5.70053	0.266857	-4.38378
	3.33605	-10.8409	0.518223	-4.38378	0.339724	-3.054
	3.94737	-9.57443	0.652485	-3.054	0.424531	-1.71098
	4.63551	-8.29567	0.810212	-1.71098	0.534896	-0.354539
	5.40549	-7.00443	0.994702	-0.354539	0.660633	1.01554
	6.27701	-5.70053	1.20753	1.01554	0.806396	2.39946
	7.21723	-4.38378	1.44927	2.39946	0.924158	3.79742
	8.27892	-3.054	1.72102	3.79742	1.17206	5.20965
	9.46994	-1.71098	2.02406	5.20965	1.3913	6.63637
	10.7974	-0.354539	2.35879	6.63637	1.63739	8.07779
	12.2907	1.01554	2.72642	8.07779	1.90855	9.53416
	13.971	2.39946	3.12768	9.53416	2.20807	11.0057
	15.8537	3.79742	3.5637	11.0057	2.53544	12.4926
	17.993	5.20965	4.03565	12.4926	2.89161	13.9952
	20.4426	6.63637	4.54497	13.9952	3.28492	15.5137
	23.2622	8.07779	5.09331	15.5137	3.69276	17.0484
	26.5448	9.53416	5.68269	17.0484	4.13947	18.5994
	30.4031	11.0057	6.35118	18.5994	4.61151	20.1672
	35.0353	12.4926	6.99429	20.1672	5.13042	21.7518
	40.7481	13.9952	7.7219	21.7518	5.67733	23.3538
	48.032	15.5137	8.50213	23.3538	6.26058	24.9732
	57.9103	17.0484	9.37783	24.9732	6.88376	26.6104
	57.9	17.0484	10.2375	26.6104	7.54403	28.2657
	59.1292	17.2027	11.2028	28.2657	8.24882	29.9394
	60.2443	17.3573	12.245	29.9394	8.99936	31.6318
	61.765	17.5119	13.3616	31.6318	9.82743	33.3432
	63.5483	17.6668	14.5723	33.3432	10.6513	35.074
	64.9735	17.8218	15.8833	35.074	11.5603	36.8244
	66.2167	17.977	17.3106	36.8244	12.5317	38.5948
	67.8931	18.1324	18.8666	38.5948	13.5706	40.3856
	69.6879	18.2879	20.4838	40.3856	14.6665	42.1971
	71.6198	18.4436	22.4626	42.1971	15.8859	44.0296
	73.7277	18.5994	24.5403	44.0296	17.1695	45.8836
	75.6885	18.7554	26.9165	45.8836	18.5621	47.7594
	78.582	18.9116	29.5965	47.7594	20.0826	49.6573
	81.4473	19.068	32.7041	49.6573	21.7201	51.5779
	84.7811	19.2245	36.3602	51.5779	23.5244	53.5215
	88.905	19.3812	40.8553	53.5215	25.4747	55.4885
	94.2746	19.538	46.7069	55.4885	27.7333	57.4793
	103.587	19.6951	46.6966	55.4885	30.2057	59.4945
	109.623	19.7099	47.4104	55.6865	33.0877	61.5343
	115.548	19.6951	48.2589	55.8848	36.3971	63.5993
	126.757	19.538	49.0717	56.0832	40.3774	65.69
	133.674	19.3812	49.6958	56.282	45.3847	67.8068
	139.223	19.2245	50.5209	56.4809	52.2964	69.9503
	144.143	19.068	51.393	56.6801	52.3419	69.9503
	148.601	18.9116	52.1184	56.8796	53.1643	70.1661
	152.158	18.7554	53.3499	57.0793	54.1243	70.3822
	156.553	18.5994	54.154	57.2792	55.0801	70.5986
	160.2	18.4436	55.4558	57.4793	56.1278	70.8152
	163.694	18.2879	56.6391	57.6798	57.2637	71.0321
	167.054	18.1324	57.8706	57.8804	58.526	71.2493
	170.302	17.977	59.3515	58.0813	59.6957	71.4668
	173.82	17.8218	60.9856	58.2825	61.7308	71.6845
	176.688	17.6668	62.8618	58.4838	63.1225	71.9025
	179.464	17.5119	65.0806	58.6855	65.2918	72.1208
	182.573	17.3573	67.7902	58.8874	67.4205	72.3394
	185.247	17.2027	72.0997	59.0895	70.9013	72.5583
	187.586	17.0484	77.1836	59.1553	76.3021	72.6089
	188.049	17.0484	82.5543	59.0895	82.6565	72.5583
	213.854	15.5137	87.4885	58.8874	86.5609	72.3394
	237.411	13.9952	91.3327	58.6855	89.1353	72.1208
	259.107	12.4926	94.1136	58.4838	91.5564	71.9025
	280.309	11.0057	96.6972	58.2825	94.0122	71.6845
	300.827	9.53416	98.9721	58.0813	96.1055	71.4668
	320.997	8.07779	101.045	57.8804	97.9147	71.2493
	340.9	6.63637	103.288	57.6798	100.004	71.0321
	360.628	5.20965	105.248	57.4793	101.786	70.8152
	380.257	3.79742	107.077	57.2792	103.487	70.5986
	399.842	2.39946	108.994	57.0793	105.133	70.3822
	419.46	1.01554	110.631	56.8796	106.699	70.1661
	438.988	-0.354539	112.351	56.6801	108.28	69.9503
	458.609	-1.71098	113.995	56.4809	108.228	69.9503
	478.313	-3.054	115.597	56.282	121.759	67.8068
	498.054	-4.38378	117.305	56.0832	133.515	65.69
	518.121	-5.70053	118.757	55.8848	144.375	63.5993
	537.853	-7.00443	120.204	55.6865	154.815	61.5343
	558.153	-8.29567	121.675	55.4885	164.695	59.4945
	578.081	-9.57443	121.729	55.4885	174.511	57.4793
	599.018	-10.8409	135.425	53.5215	183.979	55.4885
	618.746	-12.0953	147.97	51.5779	193.751	53.5215
	639.29	-13.3377	159.971	49.6573	203.298	51.5779
	659.88	-14.5683	171.35	47.7594	212.831	49.6573
	680.696	-15.7873	182.599	45.8836	222.398	47.7594
	701.573	-16.9949	193.749	44.0296	232	45.8836
	722.571	-18.1912	204.812	42.1971	241.664	44.0296
	743.676	-19.3763	216.036	40.3856	251.203	42.1971
	764.886	-20.5505	226.753	38.5948	261.216	40.3856
	786.24	-21.7139	237.805	36.8244	271.133	38.5948
	807.602	-22.8665	248.941	35.074	281.159	36.8244
	829.098	-24.0087	260.147	33.3432	291.299	35.074
	850.67	-25.1405	271.458	31.6318	301.493	33.3432
	872.319	-26.262	282.878	29.9394	311.96	31.6318
	894.031	-27.3735	294.437	28.2657	322.495	29.9394
	915.801	-28.4749	306.143	26.6104	333.174	28.2657
	937.629	-29.5666	317.839	24.9732	343.797	26.6104
	959.486	-30.6485	329.966	23.3538	354.988	24.9732
	981.379	-31.7208	342.127	21.7518	366.133	23.3538
	1003.29	-32.7837	354.458	20.1672	377.445	21.7518
	1025.22	-33.8373	366.945	18.5994	388.845	20.1672
	1047.12	-34.8817	379.659	17.0484	400.581	18.5994
	1069.07	-35.917	392.538	15.5137	412.413	17.0484
	1090.97	-36.9433	405.61	13.9952	424.301	15.5137
	1112.85	-37.9608	418.878	12.4926	436.626	13.9952
	1134.69	-38.9696	432.347	11.0057	448.998	12.4926
	1156.47	-39.9697	446.019	9.53416	461.587	11.0057
	1178.2	-40.9613	459.903	8.07779	474.36	9.53416
	1199.86	-41.9445	473.986	6.63637	487.307	8.07779
	1226.8	-42.9194	488.223	5.20965	500.486	6.63637
	1242.94	-43.8862	502.793	3.79742	513.847	5.20965
	1264.33	-44.8448	517.518	2.39946	527.939	3.79742
	1285.62	-45.7954	532.456	1.01554	541.143	2.39946
	1306.79	-46.7382	547.613	-0.354539	555.134	1.01554
	1327.84	-47.6732	562.977	-1.71098	569.302	-0.354539
	1348.76	-48.6004	578.552	-3.054	583.67	-1.71098
	1369.53	-49.5201	594.355	-4.38378	598.283	-3.054
	1390.15	-50.4323	610.364	-5.70053	613.016	-4.38378
	1410.62	-51.337	626.584	-7.00443	627.983	-5.70053
	1430.92	-52.2344	643.013	-8.29567	643.158	-7.00443
	1451.06	-53.1246	659.648	-9.57443	658.595	-8.29567
	1471.02	-54.0077	676.489	-10.8409	674.114	-9.57443
	1490.92	-54.8836	693.414	-12.0953	689.881	-10.8409
	1510.39	-55.7526	710.766	-13.3377	705.819	-12.0953
			728.201	-14.5683	721.991	-13.3377
			745.819	-15.7873	738.324	-14.5683
			763.649	-16.9949	754.8	-15.7873
			781.63	-18.1912	771.547	-16.9949
			799.794	-19.3763	788.42	-18.1912
			818.088	-20.5505	805.458	-19.3763
			836.554	-21.7139	822.667	-20.5505
			855.2	-22.8665	840.031	-21.7139
			873.982	-24.0087	857.547	-22.8665
			892.9	-25.1405	875.21	-24.0087
			911.945	-26.262	893.011	-25.1405
			931.115	-27.3735	910.948	-26.262
			950.378	-28.4749	928.998	-27.3735
			969.776	-29.5666	947.168	-28.4749
			989.236	-30.6485	965.449	-29.5666
			1008.81	-31.7208	983.839	-30.6485
			1028.43	-32.7837	1002.29	-31.7208
			1048.13	-33.8373	1020.84	-32.7837
			1067.88	-34.8817	1039.46	-33.8373
			1087.67	-35.917	1058.15	-34.8817
			1107.48	-36.9433	1076.89	-35.917
			1127.33	-37.9608	1095.67	-36.9433
			1147.18	-38.9696	1133.34	-38.9696
			1167.03	-39.9697	1152.19	-39.9697
			1186.87	-40.9613	1171.05	-40.9613
			1206.69	-41.9445	1189.91	-41.9445
			1226.48	-42.9194	1208.75	-42.9194
			1246.23	-43.8862	1227.58	-43.8862
			1265.93	-44.8448	1246.36	-44.8448
			1285.57	-45.7954	1265.11	-45.7954
			1305.14	-46.7382	1283.8	-46.7382
			1324.63	-47.6732	1302.43	-47.6732
			1344.03	-48.6004	1321	-48.6004
			1363.33	-49.5201	1339.49	-49.5201
			1382.53	-50.4323	1357.89	-50.4323
			1401.62	-51.337	1376.19	-51.337

## Sheet: Figure1D
D	Theory								Experiment - [NaCl] = 100mM
	[NaCl] = 100mM		[NaCl] = 300mM		[NaCl] = 500mM				Temperature(°C)	[DP] (mg/ml)	SD	[CP] (mg/ml)	SD.1
	[pY-Caprin1](mg/ml)	Temperature(°C)	[pY-Caprin1](mg/ml)	Temperature(°C)	[pY-Caprin1](mg/ml)	Temperature(°C)			5	1.87743	0.0900151	272.519	2.97697
	6.52663e-06	-34.8817	3.07412e-06	-55.7526	1.75784e-06	-65.665			10	3.55996	1.64843	281.614	1.68778
	4.76702e-07	-33.8373	4.07001e-07	-54.8836	7.63908e-08	-64.8737			15	3.65741	0.787873	270.895	10.8509
	2.08172e-08	-32.7837	2.77412e-06	-54.0077	4.03531e-05	-64.0763			25	6.59373	1.84572	265.698	6.48816
	4.54814e-08	-31.7208	8.39819e-06	-53.1246	4.2172e-06	-63.2727			35	8.37371	0.647937	254.329	31.6956
	1.11867e-07	-30.6485	7.49644e-06	-52.2344	8.45976e-06	-62.463			45	11.9467	1.28331	216.976	5.87366
	1.11864e-05	-29.5666	8.32844e-06	-51.337	1.56251e-05	-61.6469			55	19.9306	2.67873	179.297	6.75113
	2.53052e-05	-28.4749	2.07637e-07	-50.4323	9.41421e-07	-60.8245			65	34.9825	4.88704	147.141	5.84665
	1.07783e-05	-27.3735	7.97114e-06	-49.5201	1.13653e-05	-59.9957
	3.74162e-06	-26.262	2.42726e-06	-48.6004	1.47024e-06	-59.1604
	2.7841e-06	-25.1405	2.08559e-06	-47.6732	5.12141e-06	-58.3185			Experiment - [NaCl] = 300mM
	5.7569e-06	-24.0087	4.04702e-05	-46.7382	3.50295e-05	-57.47			Temperature(°C)	[DP] (mg/ml)	SD	[CP] (mg/ml)	SD.1
	1.28537e-06	-22.8665	1.01621e-05	-45.7954	1.3188e-06	-56.6147			10	4.25317	1.33441	395.317	3.46488
	4.37387e-06	-21.7139	1.527e-05	-44.8448	4.1812e-06	-55.7526			15	6.4543	1.23511	379.696	11.2212
	1.79186e-06	-20.5505	2.55925e-05	-43.8862	3.43084e-05	-54.8836			25	10.4021	0.344188	337.449	6.65844
	5.60896e-06	-19.3763	7.34654e-06	-42.9194	2.53641e-05	-54.0077			30	14.3713	0.814921	299.816	3.49205
	4.43453e-06	-18.1912	6.10628e-05	-41.9445	8.2946e-05	-53.1246			35	23.9498	1.12239	246.208	12.5607
	1.69186e-05	-16.9949	2.34956e-05	-40.9613	3.73912e-05	-52.2344			40	33.4715	2.33891	219.049	19.9919
	4.11872e-06	-15.7873	2.95291e-05	-39.9697	4.56251e-05	-51.337
	3.08808e-05	-14.5683	4.59726e-05	-38.9696	6.61472e-05	-50.4323
	3.38712e-05	-13.3377	0.000299296	-37.9608	9.82303e-05	-49.5201			Experiment - [NaCl] = 500mM
	6.09349e-05	-12.0953	0.000108774	-36.9433	0.000160895	-48.6004			Temperature(°C)	[DP] (mg/ml)	SD	[CP] (mg/ml)	SD.1
	4.56821e-05	-10.8409	0.000166204	-35.917	0.0002512	-47.6732			10	17.8453	0.0811385	195.538	4.80681
	0.000173132	-9.57443	0.000251813	-34.8817	0.000385865	-46.7382			20	43.1353	0.234946	135.772	5.87366
	0.000290703	-8.29567	0.000373668	-33.8373	0.000585949	-45.7954
	0.000149641	-7.00443	0.000578695	-32.7837	0.000888401	-44.8448
	0.000215175	-5.70053	0.000833752	-31.7208	0.00133014	-43.8862
	0.000302082	-4.38378	0.00094446	-30.6485	0.00197155	-42.9194
	0.000435155	-3.054	0.00178272	-29.5666	0.00291754	-41.9445
	0.000614212	-1.71098	0.00255389	-28.4749	0.00427241	-40.9613
	0.000865204	-0.354539	0.00371586	-27.3735	0.00620211	-39.9697
	0.00130325	1.01554	0.00528409	-26.262	0.00893882	-38.9696
	0.00172748	2.39946	0.00722843	-25.1405	0.0134614	-37.9608
	0.00251908	3.79742	0.0105836	-24.0087	0.0182061	-36.9433
	0.00314319	5.20965	0.0147384	-22.8665	0.0255538	-35.917
	0.00426727	6.63637	0.020496	-21.7139	0.0357052	-34.8817
	0.00581275	8.07779	0.0282445	-20.5505	0.0492853	-33.8373
	0.00774585	9.53416	0.0386559	-19.3763	0.0678527	-32.7837
	0.0105193	11.0057	0.0526786	-18.1912	0.0928664	-31.7208
	0.0140218	12.4926	0.0708972	-16.9949	0.125081	-30.6485
	0.0188202	13.9952	0.0948358	-15.7873	0.168431	-29.5666
	0.0245494	15.5137	0.126141	-14.5683	0.220676	-28.4749
	0.0317856	17.0484	0.164646	-13.3377	0.293073	-27.3735
	0.0424532	18.5994	0.218172	-12.0953	0.381304	-26.262
	0.0546147	20.1672	0.282578	-10.8409	0.491643	-25.1405
	0.0704929	21.7518	0.361346	-9.57443	0.623674	-24.0087
	0.0911324	23.3538	0.462769	-8.29567	0.783769	-22.8665
	0.11638	24.9732	0.581874	-7.00443	0.980507	-21.7139
	0.147701	26.6104	0.720805	-5.70053	1.19655	-20.5505
	0.18527	28.2657	0.884022	-4.38378	1.45464	-19.3763
	0.232512	29.9394	1.07832	-3.054	1.7483	-18.1912
	0.289869	31.6318	1.31232	-1.71098	2.07988	-16.9949
	0.358856	33.3432	1.5709	-0.354539	2.44659	-15.7873
	0.441467	35.074	1.85548	1.01554	2.89041	-14.5683
	0.539837	36.8244	2.1837	2.39946	3.31411	-13.3377
	0.655823	38.5948	2.55489	3.79742	3.37512	-12.0953
	0.789977	40.3856	2.95778	5.20965	4.35601	-10.8409
	0.948033	42.1971	3.39298	6.63637	4.94516	-9.57443
	1.12562	44.0296	3.88521	8.07779	5.58115	-8.29567
	1.32863	45.8836	4.39467	9.53416	6.27606	-7.00443
	1.54891	47.7594	4.96063	11.0057	7.02166	-5.70053
	1.81721	49.6573	5.57286	12.4926	7.82858	-4.38378
	2.0923	51.5779	6.20809	13.9952	8.69917	-3.054
	2.4158	53.5215	6.94817	15.5137	9.6335	-1.71098
	2.77382	55.4885	7.71757	17.0484	10.6471	-0.354539
	3.17004	57.4793	8.54712	18.5994	11.7332	1.01554
	3.58485	59.4945	9.45274	20.1672	12.9355	2.39946
	4.04868	61.5343	10.4085	21.7518	14.2063	3.79742
	4.55237	63.5993	11.4428	23.3538	15.6009	5.20965
	5.1056	65.69	12.5834	24.9732	17.1301	6.63637
	5.6974	67.8068	13.8136	26.6104	18.7885	8.07779
	6.33716	69.9503	15.1649	28.2657	20.6173	9.53416
	7.06846	72.1208	16.6241	29.9394	22.6586	11.0057
	7.84473	74.3191	18.2243	31.6318	24.9246	12.4926
	8.68963	76.5455	20.0029	33.3432	27.514	13.9952
	9.62143	78.8006	21.9837	35.074	30.4282	15.5137
	10.6377	81.085	24.2035	36.8244	33.8536	17.0484
	11.7742	83.3993	26.773	38.5948	37.9811	18.5994
	13.0078	85.744	29.7115	40.3856	43.1318	20.1672
	14.456	88.1198	33.2095	42.1971	50.2183	21.7518
	15.9725	90.5273	37.3534	44.0296	50.2188	21.7518
	17.765	92.9671	43.365	45.8836	50.853	21.9113
	19.8258	95.4398	43.3651	45.8836	52.0497	22.0708
	22.2505	97.9462	44.0794	46.0702	53.0431	22.2306
	25.3593	100.487	44.9068	46.257	54.192	22.3905
	29.334	103.063	45.2895	46.444	55.2497	22.5506
	29.9356	103.322	46.1501	46.6313	56.5042	22.7109
	30.3405	103.582	47.3152	46.8187	57.7024	22.8714
	30.8106	103.842	48.083	47.0064	59.2826	23.032
	31.4147	104.103	49.2359	47.1943	60.9806	23.1928
	31.9575	104.364	50.2616	47.3824	62.9808	23.3538
	32.4599	104.625	51.3615	47.5708	65.6294	23.5149
	33.0656	104.887	53.0952	47.7594	67.9248	23.6762
	33.9327	105.149	54.2236	47.9482	75.8171	23.8002
	34.6697	105.411	55.8896	48.1372	85.1734	23.6762
	35.4661	105.674	57.9144	48.3264	87.5439	23.5149
	36.217	105.937	60.7082	48.5159	90.4209	23.3538
	37.2764	106.201	67.6408	48.7017	93.0741	23.1928
	38.3729	106.465	75.1578	48.5159	95.4986	23.032
	39.6158	106.729	78.3551	48.3264	97.3795	22.8714
	42.1227	106.994	81.032	48.1372	99.1487	22.7109
	43.2869	107.259	83.2766	47.9482	101.423	22.5506
	47.5133	107.524	85.5557	47.7594	101.92	22.3905
	48.3712	107.526	86.9866	47.5708	104.928	22.2306
	50.5396	107.524	88.7262	47.3824	106.585	22.0708
	54.1601	107.259	90.5353	47.1943	108.1	21.9113
	56.0821	106.994	91.8058	47.0064	109.73	21.7518
	58.3849	106.729	93.5949	46.8187	109.73	21.7518
	60.0633	106.465	94.5959	46.6313	123.44	20.1672
	61.5381	106.201	95.8731	46.444	135.35	18.5994
	62.7259	105.937	97.7935	46.257	146.276	17.0484
	64.2192	105.674	99.0843	46.0702	156.637	15.5137
	65.4326	105.411	100.344	45.8836	166.484	13.9952
	66.5893	105.149	100.344	45.8836	176.348	12.4926
	67.3956	104.887	111.805	44.0296	185.793	11.0057
	68.4167	104.625	122.033	42.1971	195.244	9.53416
	69.8521	104.364	131.438	40.3856	204.588	8.07779
	70.8024	104.103	140.344	38.5948	213.856	6.63637
	71.7354	103.842	149.101	36.8244	223.096	5.20965
	72.7262	103.582	157.371	35.074	232.329	3.79742
	73.7262	103.322	165.603	33.3432	241.625	2.39946
	74.5553	103.063	173.721	31.6318	250.86	1.01554
	82.8507	100.487	181.781	29.9394	260.137	-0.354539
	90.4776	97.9462	189.763	28.2657	269.465	-1.71098
	97.1161	95.4398	197.723	26.6104	278.886	-3.054
	103.65	92.9671	205.664	24.9732	288.348	-4.38378
	109.967	90.5273	213.619	23.3538	297.883	-5.70053
	116.072	88.1198	221.599	21.7518	307.494	-7.00443
	122.133	85.744	229.5	20.1672	317.125	-8.29567
	128.091	83.3993	237.541	18.5994	326.969	-9.57443
	133.96	81.085	245.69	17.0484	336.841	-10.8409
	140.029	78.8006	253.808	15.5137	346.107	-12.0953
	145.599	76.5455	261.875	13.9952	356.932	-13.3377
	151.413	74.3191	270.211	12.4926	367.078	-14.5683
	157.195	72.1208	278.509	11.0057	377.365	-15.7873
	163.028	69.9503	286.876	9.53416	387.771	-16.9949
	168.817	67.8068	295.298	8.07779	398.295	-18.1912
	174.644	65.69	303.837	6.63637	408.939	-19.3763
	180.495	63.5993	312.449	5.20965	419.702	-20.5505
	186.376	61.5343	321.175	3.79742	431.362	-21.7139
	192.288	59.4945	329.925	2.39946	441.628	-22.8665
	198.288	57.4793	338.773	1.01554	452.787	-24.0087
	204.228	55.4885	347.739	-0.354539	464.084	-25.1405
	210.24	53.5215	356.802	-1.71098	475.517	-26.262
	216.363	51.5779	365.973	-3.054	487.089	-27.3735
	222.481	49.6573	375.29	-4.38378	498.854	-28.4749
	226.887	47.7594	384.607	-5.70053	510.67	-29.5666
	234.91	45.8836	394.111	-7.00443	522.708	-30.6485
	241.199	44.0296	403.707	-8.29567	534.869	-31.7208
	247.571	42.1971	413.411	-9.57443	547.178	-32.7837
	253.982	40.3856	423.182	-10.8409	559.696	-33.8373
	260.464	38.5948	433.205	-12.0953	572.324	-34.8817
	267.019	36.8244	443.28	-13.3377	585.131	-35.917
	273.653	35.074	453.47	-14.5683	598.079	-36.9433
	280.347	33.3432	463.8	-15.7873	611.09	-37.9608
	287.143	31.6318	474.258	-16.9949	624.561	-38.9696
	293.967	29.9394	484.848	-18.1912	638.046	-39.9697
	300.892	28.2657	495.58	-19.3763	651.704	-40.9613
	307.63	26.6104	506.449	-20.5505	665.539	-41.9445
	314.743	24.9732	517.455	-21.7139	679.547	-42.9194
	322.224	23.3538	528.609	-22.8665	693.743	-43.8862
	329.423	21.7518	539.912	-24.0087	708.116	-44.8448
	336.775	20.1672	551.354	-25.1405	722.673	-45.7954
	344.211	18.5994	562.952	-26.262	737.413	-46.7382
	351.775	17.0484	574.687	-27.3735	752.339	-47.6732
	359.379	15.5137	586.587	-28.4749	767.452	-48.6004
	367.14	13.9952	598.67	-29.5666	782.755	-49.5201
	374.931	12.4926	610.822	-30.6485	798.237	-50.4323
	382.86	11.0057	623.266	-31.7208	813.897	-51.337
	390.901	9.53416	635.809	-32.7837	829.757	-52.2344
	399.028	8.07779	648.502	-33.8373	845.847	-53.1246
	407.278	6.63637	661.412	-34.8817	862.066	-54.0077
	415.619	5.20965	674.451	-35.917	878.533	-54.8836
	424.146	3.79742	687.682	-36.9433	895.155	-55.7526
	432.715	2.39946	701.179	-37.9608	911.96	-56.6147
	441.442	1.01554	714.638	-38.9696	929.126	-57.47
	450.17	-0.354539	728.38	-39.9697	946.224	-58.3185
	459.097	-1.71098	742.294	-40.9613	963.593	-59.1604
	468.155	-3.054	756.391	-41.9445	981.117	-59.9957
	477.323	-4.38378	770.67	-42.9194	998.913	-60.8245
	486.628	-5.70053	785.137	-43.8862	1017.17	-61.6469
	496.056	-7.00443	799.779	-44.8448	1034.97	-62.463
	505.689	-8.29567	814.625	-45.7954	1053.26	-63.2727
	515.282	-9.57443	829.607	-46.7382	1071.77	-64.0763
	525.118	-10.8409	844.829	-47.6732	1090.42	-64.8737
	535.102	-12.0953	860.16	-48.6004	1109.29	-65.665
	545.162	-13.3377	875.696	-49.5201
	555.493	-14.5683	891.46	-50.4323
	565.715	-15.7873	907.42	-51.337
	576.262	-16.9949	923.598	-52.2344
	586.939	-18.1912	939.84	-53.1246
	597.745	-19.3763	956.364	-54.0077
	608.694	-20.5505	973.042	-54.8836
	619.823	-21.7139	989.993	-55.7526
	631.044	-22.8665
	642.569	-24.0087
	654.071	-25.1405
	665.69	-26.262
	677.574	-27.3735
	689.638	-28.4749
	701.812	-29.5666
	714.209	-30.6485
	726.736	-31.7208
	739.448	-32.7837
	752.317	-33.8373
	765.124	-34.8817
