# Supplementary material for: Electrostatics of salt-dependent reentrant phase behaviors highlights diverse roles of ATP in biomolecular condensates
Source: eLife. 2025 Mar 3;13:RP100284. doi: 10.7554/eLife.100284 (PMC11875540; doi:10.7554/eLife.100284)
Supplement: Figure 2—source data 1. [file elife-100284-fig2-data1.xlsx]

## Sheet: Figure2
A and B	A					B
	Dilute Caprin1 (mg/ml)	Cond Caprin1 (mg/ml)	Dilute Na+ (M)	Cond Na+ (M)		Dilute Caprin1 (mg/ml)	Cond Caprin1 (mg/ml)	Dilute Na+ (M)	Cond Na+ (M)
	4.299	383.013	0.344829	0.226841		15.5226	240.029	0.133142	0.075735
	3.7007	423.945	1.14535	0.945561		6.77179	332.219	0.224796	0.133861
	5.34739	396.774	1.97505	1.71769		4.299	383.013	0.344829	0.226841
	7.34608	365.635	2.83559	2.52261		3.66608	402.323	0.434235	0.301684
	9.77997	333.427	3.81535	3.44441		3.32411	416.654	0.553046	0.405138
	12.5943	302.628	4.88375	4.45781		3.23402	424.864	0.701246	0.537851
	15.7638	274.114	6.00997	5.53688		3.31392	427.322	0.849303	0.67269
	19.5667	246.197	7.25177	6.74108		3.56408	425.703	1.05653	0.863405
	23.6611	221.441	8.45981	7.92908
	28.5984	197.743	9.72056	9.18763
	33.9707	176.623	10.8858	10.3725
	40.5588	155.761	12.0404	11.573
	48.8632	135.057	13.1216	12.7336
C and D	C					D
	Dilute pY-Caprin1 (mg/ml)	Cond pY-Caprin1 (mg/ml)	Dilute Na+ (M)	Cond Na+ (M)		Dilute pY-Caprin1 (mg/ml)	Cond pY-Caprin1 (mg/ml)	Dilute Na+ (M)	Cond Na+ (M)
	0.000378343	331.77	0.0394616	0.0622297		8.37e-07	346.801	0.00750079	0.00702247
	0.0456528	302.872	0.0980711	0.152478		4.73e-06	344.871	0.0140005	0.0178352
	0.519768	276.961	0.158292	0.232911		1.92e-05	341.882	0.0203638	0.02909
	2.01523	253.101	0.219958	0.306817		6.12e-05	338.567	0.026711	0.0403056
	5.16599	225.905	0.297142	0.390937		0.00016043	335.182	0.0330674	0.0513862
	9.48156	200.108	0.376108	0.470023		0.00037834	331.77	0.0394616	0.0622297
	15.6341	172.683	0.46429	0.551719		0.00082144	328.299	0.0458732	0.0729106
	23.1971	147.223	0.547358	0.622765		0.00296938	321.747	0.0587846	0.0937225
	33.0597	122.287	0.625706	0.683648		0.00863214	315.296	0.0717939	0.113872
						0.0456528	302.872	0.0980711	0.152478
E and F	E					F
	Dilute Caprin1 (mg/ml)	Cond Caprin1 (mg/ml)	Dilute Na+ (M)	Cond Na+ (M)		Dilute Caprin1 (mg/ml)	Cond Caprin1 (mg/ml)	Dilute Na+ (M)	Cond Na+ (M)
	0.0267336	696.987	0.495524	0.528964		0.00599502	759.744	0.0423292	0.0352118
	0.513878	578.122	1.45104	1.4668		0.00344549	754.425	0.122379	0.122494
	2.01073	494.716	2.42321	2.36982		0.00540553	743.277	0.201874	0.211651
	4.16987	431.378	3.40217	3.27065		0.00825777	730.712	0.281551	0.299898
	7.08789	374.461	4.52363	4.3078		0.013958	717.935	0.361528	0.386852
	10.4212	328.288	5.64418	5.35609		0.0234439	701.115	0.468656	0.500804
	14.1113	289.298	6.76126	6.41608		0.0390096	684.913	0.576318	0.612745
	18.275	255.512	7.87281	7.48719		0.0613996	669.381	0.684459	0.722994
	23.566	222.428	9.08679	8.67817		0.0937319	654.556	0.793025	0.831847
	29.6224	193.444	10.2345	9.82789		0.132994	640.397	0.901969	0.939543
	36.6416	167.619	11.2871	10.9084
	46.4649	140.488	12.3471	12.0349
G and H	G					H
	Dilute Caprin1 (mg/ml)	Cond Caprin1 (mg/ml)	Dilute ATP-Mg^2- (M)	Cond ATP-Mg^2- (M)		Dilute Caprin1 (mg/ml)	Cond Caprin1 (mg/ml)	Dilute ATP-Mg^2- (M)	Cond ATP-Mg^2- (M)
	0.200012	623.586	0.519427	0.901272		0.00974091	726.399	0.154092	0.589523
	1.74656	505.175	1.14291	1.41621		0.0492609	677.054	0.315195	0.730166
	4.16987	431.378	1.70352	1.88772		0.132994	640.397	0.451062	0.844459
	7.08789	374.461	2.26596	2.37299		0.286986	607.678	0.588033	0.958023
	10.4212	328.288	2.82819	2.87012		0.513878	578.122	0.725821	1.07165
	14.1113	289.298	3.38889	3.3773		0.854684	551.684	0.864376	1.18576
	19.06	250.001	4.04446	3.98417		1.26519	527.428	1.00343	1.30057
	24.4955	217.457	4.65379	4.56168
	29.6224	193.444	5.13456	5.02712
	36.6416	167.619	5.66497	5.55229
	46.4649	140.488	6.20076	6.09964
I and J	I					J
	Dilute Caprin1 (mg/ml)	Cond Caprin1 (mg/ml)	Dilute Mg^2+ (M)	Cond Mg^2+ (M)		Dilute Caprin1 (mg/ml)	Cond Caprin1 (mg/ml)	Dilute Mg^2+ (M)	Cond Mg^2+ (M)
	5.72e-17	1268.1	0.00109709	0.370781		1.18e-15	1251.71	0.00027979	0.0992739
	2.43e-20	1150.62	0.0149932	1.3551		1.13e-16	1266.98	0.0008579	0.302757
	4.8e-11	968.711	0.398517	1.99349		1.53e-17	1265.75	0.00166824	0.505704
	1.45e-05	809.421	1.20034	2.58088		1.32e-18	1247.14	0.00330628	0.76655
	0.00466492	678.735	2.02923	3.16246		8.96e-20	1202.88	0.00728664	1.09053
	0.109794	579.907	2.77946	3.69333		2.39e-20	1134.99	0.0186023	1.42191
	1.07017	482.417	3.65132	4.33033		1.03e-15	1032.12	0.142733	1.78531
	3.71988	401	4.50833	4.98442		4.8e-11	968.711	0.398517	1.99349
	8.02764	330.931	5.36298	5.66848		1.56e-08	911.634	0.661868	2.19208
	15.036	262.209	6.32183	6.47565
	23.2117	211.56	7.09909	7.16173
	43.0427	147.094	8.12825	8.11899
K and L	K					L
	Dilute Caprin1 (mg/ml)	Cond Caprin1 (mg/ml)	Dilute ATP^4- (M)	Cond ATP^4- (M)		Dilute Caprin1 (mg/ml)	Cond Caprin1 (mg/ml)	Dilute ATP^4- (M)	Cond ATP^4- (M)
	8.96e-20	1202.88	0.00728664	1.09053		5.72e-17	1268.1	0.00109709	0.370781
	4.8e-11	968.711	0.398517	1.99349		1.32e-18	1247.14	0.00330628	0.76655
	2.4e-05	799.969	1.25494	2.61947		8.96e-20	1202.88	0.00728664	1.09053
	0.0116789	652.66	2.21589	3.29346		2.43e-20	1150.62	0.0149932	1.3551
	0.347766	535.572	3.15762	3.96647		7.19e-18	1055.59	0.0791509	1.70968
	2.33749	435.63	4.12728	4.68997		3.15e-12	988.841	0.311836	1.92614
	6.41103	353.171	5.07873	5.4373		3.02e-09	930.157	0.573616	2.12629
	13.2354	278.738	6.07789	6.26788		2.43e-07	875.957	0.839775	2.32253
	22.0452	217.19	7.00724	7.0791		1.45e-05	809.421	1.20034	2.58088
	31.992	174.543	7.68123	7.69559		0.00015896	763.236	1.47434	2.77388
						0.00097591	719.758	1.75078	2.96747
