# Supplementary material for: Electrostatics of salt-dependent reentrant phase behaviors highlights diverse roles of ATP in biomolecular condensates
Source: eLife. 2025 Mar 3;13:RP100284. doi: 10.7554/eLife.100284 (PMC11875540; doi:10.7554/eLife.100284)
Supplement: Figure 3—source data 1. [file elife-100284-fig3-data1.xlsx]

## Sheet: Sheet 1
Data for Fig.3a
ATP [mM]	Average normalized OD600	Standard Deviation of Normalized OD600		Salt [M]	Average of Normalized OD600	Standard Deviation of Normalized OD600
0	0.000101667	0.000176097		0	0.00439722	0.00391263
0.1	0.000881117	0.000211897		0.2	0.00146574	0.000518368
0.2	0	0		0.4	0.120557	0.014848
0.4	0	0		0.6	0.348113	0.0271698
0.7	0.0230107	0.000962205		0.8	0.617442	0.0106116
1	0.0153518	0.000949498		1	0.925614	0.0341362
1.5	0.0381591	0.0141899		1.2	0.940638	0.0275523
2	0.250102	0.0134309		1.4	1	0
3	0.543615	0.0254861		1.6	0.954196	0.022408
5	0.773214	0.0115605		1.8	0.930744	0.0148735
6	0.99878	0.0238157		2	0.914254	0.0119023
7	0.889183	0.0214508		2.2	0.935141	0.020057
8	1	0		2.4	0.936607	0.0247159
9	0.928257	0.015786		2.6	0.892268	0.0116772
10	0.913379	0.0177007		2.8	0.932942	0.0115281
12	0.962383	0.0115301		3	0.827409	0.00967454
15	0.818524	0.0123593		3.2	0.831074	0.0100909
20	0.473566	0.0270338		3.4	0.777208	0.00737796
25	0.162329	0.0460508		3.6	0.785636	0.00861344
30	0.00403281	0.0053668		3.8	0.665445	0.0078933
35	0.00860784	0.0010919		4	0.648223	0.0137388
40	0.00911617	0.00057033		4.2	0.598388	0.00675744
