# Supplementary material for: Electrostatics of salt-dependent reentrant phase behaviors highlights diverse roles of ATP in biomolecular condensates
Source: eLife. 2025 Mar 3;13:RP100284. doi: 10.7554/eLife.100284 (PMC11875540; doi:10.7554/eLife.100284)
Supplement: Figure 4—source data 1. [file elife-100284-fig4-data1.xlsx]

## Sheet: Sheet1
Caprin1 0 mM [NaCl]					Caprin1 200 mM [NaCl]					Caprin1 480 mM [NaCl]					Caprin1 960 mM [NaCl]
dilute phase		condensed phase			dilute phase		condensed phase			dilute phase		condensed phase			dilute phase		condensed phase
protein density (mg/ml)	T/T0_cr	protein density (mg/ml)	T/T0_cr		protein density (mg/ml)	T/T0_cr	protein density (mg/ml)	T/T0_cr		protein density (mg/ml)	T/T0_cr	protein density (mg/ml)	T/T0_cr		protein density (mg/ml)	T/T0_cr	protein density (mg/ml)	T/T0_cr
0.5	0.829	800	0.829		1.2	1.036	282	1.036		1.1	1.036	433	1.036		1.9	1.036	444	1.036
1.2	0.88	750	0.88		1.4	1.088	275	1.088		2.5	1.14	384	1.14		3.2	1.14	295	1.14
3.1	0.933	670	0.933		1.6	1.166	220	1.166		2.9	1.166	317	1.166		4.2	1.166	239	1.166
42	0.984	315	0.984		107.6	1.181	107.6	1.181		136.7	1.202	136.7	1.202		109.2	1.186	109.2	1.186
166.5	1	166.5	1
Note: the protein density and the T/T0_cr value provided above are simulated data points at 0, 200, 480, and 960 mM [NaCl]
(Fig.4a)

## Sheet: Sheet2
pY-Caprin1 0 mM [NaCl]					pY-Caprin1 200 mM [NaCl]					pY-Caprin1 480 mM [NaCl]					pY-Caprin1 960 mM [NaCl]
dilute phase		condensed phase			dilute phase		condensed phase			dilute phase		condensed phase			dilute phase		condensed phase
protein density (mg/ml)	T/T0_cr	protein density (mg/ml)	T/T0_cr		protein density (mg/ml)	T/T0_cr	protein density (mg/ml)	T/T0_cr		protein density (mg/ml)	T/T0_cr	protein density (mg/ml)	T/T0_cr		protein density (mg/ml)	T/T0_cr	protein density (mg/ml)	T/T0_cr
2.27	1.865	475	1.865		0.6	1.347	522	1.347		0.9	1.036	675	1.036		0.9	0.932	600	0.932
4.9	1.967	421	1.967		1.1	1.502	462	1.502		1.2	1.14	591	1.14		1.5	1.036	554	1.036
11.6	2.072	358	2.072		1.5	1.554	340	1.554		1.8	1.243	519	1.243		2.4	1.14	448	1.14
20	2.124	274	2.124		2.5	1.58	258	1.58		3.2	1.347	428	1.347		9.5	1.243	332	1.243
141.2	2.172	141.2	2.172		125	1.632	125	1.632		6.8	1.451	268	1.451		14	1.293	260	1.293
										130	1.507	130	1.507		133	1.35	133	1.35
Note: the protein density and the T/T0_cr value provided above are simulated data points at 0, 200, 480, and 960 mM [NaCl]
(Fig.4b)

## Sheet: Sheet3
Fig.4e
	Z (Angstorm)	[Caprin1] (mg/ml)		Z (Angstorm)	[Na+] (mg/ml)		Z (Angstorm)	[Cl-] (mg/ml)
	-1080	1.33333		-1080	11.1471		-1080	17.2225
	-1070	1.43049		-1070	11.1405		-1070	17.2399
	-1060	1.55544		-1060	11.1403		-1060	17.2803
	-1050	1.53434		-1050	11.1306		-1050	17.1885
	-1040	1.35025		-1040	11.1256		-1040	17.2437
	-1030	1.24552		-1030	11.1616		-1030	17.2219
	-1020	1.31311		-1020	11.1229		-1020	17.2062
	-1010	1.41399		-1010	11.13		-1010	17.2208
	-1000	1.40275		-1000	11.1329		-1000	17.2226
	-990	1.36839		-990	11.1296		-990	17.2092
	-980	1.32016		-980	11.1489		-980	17.226
	-970	1.32851		-970	11.1306		-970	17.2224
	-960	1.366		-960	11.1238		-960	17.2011
	-950	1.40452		-950	11.1795		-950	17.2902
	-940	1.48687		-940	11.1717		-940	17.2531
	-930	1.42249		-930	11.1496		-930	17.2352
	-920	1.36545		-920	11.1332		-920	17.2398
	-910	1.38889		-910	11.1412		-910	17.2559
	-900	1.45038		-900	11.1626		-900	17.2236
	-890	1.53845		-890	11.1297		-890	17.2151
	-880	1.52039		-880	11.1218		-880	17.2134
	-870	1.44564		-870	11.097		-870	17.1513
	-860	1.34715		-860	11.1235		-860	17.2386
	-850	1.35486		-850	11.1236		-850	17.2091
	-840	1.38906		-840	11.1185		-840	17.1876
	-830	1.34459		-830	11.1369		-830	17.1992
	-820	1.31785		-820	11.1584		-820	17.267
	-810	1.28928		-810	11.1031		-810	17.1821
	-800	1.1948		-800	11.155		-800	17.2389
	-790	1.12523		-790	11.1641		-790	17.2226
	-780	1.20887		-780	11.1648		-780	17.2561
	-770	1.29293		-770	11.1313		-770	17.2402
	-760	1.34491		-760	11.1352		-760	17.2072
	-750	1.30412		-750	11.1156		-750	17.2242
	-740	1.53656		-740	11.1795		-740	17.2634
	-730	1.6358		-730	11.1456		-730	17.2317
	-720	1.64848		-720	11.1163		-720	17.2011
	-710	1.72687		-710	11.1526		-710	17.2722
	-700	1.76907		-700	11.1245		-700	17.2384
	-690	1.66667		-690	11.1589		-690	17.2139
	-680	1.63057		-680	11.148		-680	17.265
	-670	1.61614		-670	11.1601		-670	17.2759
	-660	1.49259		-660	11.1429		-660	17.2461
	-650	1.36334		-650	11.1621		-650	17.2836
	-640	1.21835		-640	11.1569		-640	17.2019
	-630	1.2625		-630	11.1226		-630	17.2197
	-620	1.31331		-620	11.1129		-620	17.185
	-610	1.24324		-610	11.1722		-610	17.2842
	-600	1.29558		-600	11.1392		-600	17.1908
	-590	1.32467		-590	11.1407		-590	17.2395
	-580	1.37494		-580	11.1354		-580	17.2192
	-570	1.3609		-570	11.1468		-570	17.2445
	-560	1.30807		-560	11.1344		-560	17.2091
	-550	1.35218		-550	11.139		-550	17.2069
	-540	1.33671		-540	11.1166		-540	17.2262
	-530	1.37251		-530	11.1544		-530	17.2591
	-520	1.41367		-520	11.1561		-520	17.2047
	-510	1.55172		-510	11.1407		-510	17.2765
	-500	1.56347		-500	11.157		-500	17.2463
	-490	1.4991		-490	11.1354		-490	17.2294
	-480	1.38103		-480	11.1244		-480	17.1494
	-470	1.45866		-470	11.1361		-470	17.241
	-460	1.49235		-460	11.1202		-460	17.2821
	-450	1.37189		-450	11.1723		-450	17.2172
	-440	1.29941		-440	11.1465		-440	17.2174
	-430	1.33635		-430	11.1433		-430	17.2774
	-420	1.36029		-420	11.1292		-420	17.2038
	-410	1.28824		-410	11.119		-410	17.1825
	-400	1.2415		-400	11.1534		-400	17.2263
	-390	1.24817		-390	11.1196		-390	17.2043
	-380	1.374		-380	11.181		-380	17.2754
	-370	1.52331		-370	11.1258		-370	17.2141
	-360	1.65501		-360	11.1584		-360	17.236
	-350	1.81255		-350	11.1456		-350	17.2881
	-340	2.08174		-340	11.1559		-340	17.3015
	-330	2.59405		-330	11.1966		-330	17.3794
	-320	3.13863		-320	11.1233		-320	17.26
	-310	3.9696		-310	11.1232		-310	17.3172
	-300	4.82349		-300	11.0962		-300	17.3199
	-290	5.7837		-290	11.1232		-290	17.3486
	-280	7.01873		-280	11.1212		-280	17.4624
	-270	8.23534		-270	11.1318		-270	17.4994
	-260	9.77442		-260	11.1224		-260	17.5842
	-250	12.0203		-250	11.1712		-250	17.7296
	-240	15.0261		-240	11.1018		-240	17.791
	-230	20.1324		-230	11.079		-230	18.0041
	-220	28.0351		-220	11.0625		-220	18.3451
	-210	39.1693		-210	10.9973		-210	18.7105
	-200	54.0783		-200	10.9495		-200	19.2583
	-190	73.4411		-190	10.8781		-190	20.0081
	-180	96.3088		-180	10.7379		-180	20.7237
	-170	121.76		-170	10.606		-170	21.4946
	-160	149.54		-160	10.4509		-160	22.4156
	-150	178.472		-150	10.3438		-150	23.3939
	-140	208.167		-140	10.1826		-140	24.3419
	-130	237.141		-130	10.058		-130	25.3514
	-120	264.108		-120	9.94473		-120	26.1106
	-110	285.46		-110	9.78415		-110	26.6983
	-100	301.036		-100	9.73663		-100	27.2422
	-90	311.624		-90	9.68823		-90	27.5933
	-80	315.755		-80	9.6688		-80	27.8825
	-70	317.43		-70	9.66582		-70	28.0433
	-60	318.744		-60	9.65167		-60	28.1652
	-50	319.631		-50	9.64627		-50	28.1031
	-40	318.665		-40	9.64019		-40	27.9874
	-30	315.435		-30	9.68866		-30	27.9362
	-20	311.589		-20	9.66021		-20	27.7757
	-10	305.326		-10	9.686		-10	27.5806
	0	299.078		0	9.75189		0	27.3058
	10	288.535		10	9.79047		10	26.8099
	20	273.349		20	9.87682		20	26.3895
	30	254.58		30	9.98482		30	25.7254
	40	229.876		40	10.0597		40	25.0127
	50	202.85		50	10.1983		50	24.1312
	60	173.24		60	10.3498		60	23.2628
	70	145.248		70	10.5018		70	22.307
	80	118.323		80	10.6346		80	21.382
	90	92.489		90	10.7776		90	20.5702
	100	69.5429		100	10.8614		100	19.7869
	110	49.9645		110	10.9395		110	19.1196
	120	34.2627		120	11.0539		120	18.6072
	130	22.7065		130	11.1012		130	18.1531
	140	14.7604		140	11.1269		140	17.903
	150	9.42583		150	11.1172		150	17.6235
	160	6.55745		160	11.1431		160	17.4969
	170	5.43591		170	11.1815		170	17.4483
	180	5.25519		180	11.1616		180	17.4009
	190	5.7243		190	11.1136		190	17.4274
	200	6.52665		200	11.1543		200	17.4789
	210	7.11496		210	11.175		210	17.4842
	220	7.43224		220	11.1254		220	17.4375
	230	7.3735		230	11.1147		230	17.4225
	240	7.03417		240	11.1121		240	17.4424
	250	6.81165		250	11.1392		250	17.4077
	260	6.32132		260	11.1377		260	17.455
	270	5.9138		270	11.1681		270	17.4741
	280	5.69654		280	11.1162		280	17.3998
	290	5.78417		290	11.1404		290	17.3936
	300	6.07081		300	11.0875		300	17.3427
	310	6.64107		310	11.1305		310	17.4584
	320	7.08882		320	11.1496		320	17.405
	330	7.42216		330	11.1107		330	17.4397
	340	7.66518		340	11.1115		340	17.4464
	350	7.97669		350	11.0955		350	17.4646
	360	8.29316		360	11.1089		360	17.4658
	370	8.48328		370	11.0857		370	17.4209
	380	8.54803		380	11.1178		380	17.4745
	390	8.42019		390	11.1191		390	17.5024
	400	7.88049		400	11.0972		400	17.4178
	410	7.20252		410	11.0867		410	17.3828
	420	6.25414		420	11.117		420	17.38
	430	5.29793		430	11.1362		430	17.378
	440	4.64213		440	11.0964		440	17.3318
	450	4.20925		450	11.1119		450	17.3065
	460	4.07137		460	11.1437		460	17.3347
	470	3.88496		470	11.1351		470	17.3489
	480	4.02155		480	11.1162		480	17.3046
	490	4.04187		490	11.1262		490	17.2856
	500	3.93961		500	11.1203		500	17.3051
	510	3.80117		510	11.1335		510	17.3406
	520	3.62325		520	11.1371		520	17.3064
	530	3.26093		530	11.1242		530	17.2501
	540	3.00412		540	11.0807		540	17.2254
	550	2.72873		550	11.1444		550	17.31
	560	2.61172		560	11.1199		560	17.2597
	570	2.54867		570	11.1531		570	17.2774
	580	2.47276		580	11.1295		580	17.2559
	590	2.40166		590	11.1243		590	17.2444
	600	2.44185		600	11.1495		600	17.2913
	610	2.28283		610	11.1133		610	17.2287
	620	2.13498		620	11.1641		620	17.2578
	630	2.00719		630	11.1148		630	17.2557
	640	1.89406		640	11.1512		640	17.2501
	650	1.86647		650	11.1096		650	17.2188
	660	1.85763		660	11.1193		660	17.1767
	670	1.76877		670	11.1254		670	17.2386
	680	1.70251		680	11.1106		680	17.1963
	690	1.5588		690	11.1141		690	17.2142
	700	1.3294		700	11.1617		700	17.264
	710	1.35614		710	11.1223		710	17.1875
	720	1.27545		720	11.1126		720	17.1703
	730	1.18485		730	11.1592		730	17.2294
	740	1.18733		740	11.1257		740	17.2143
	750	1.22808		750	11.1623		750	17.2724
	760	1.21951		760	11.1624		760	17.2483
	770	1.30246		770	11.1489		770	17.2806
	780	1.41447		780	11.1479		780	17.1855
	790	1.33638		790	11.1472		790	17.2695
	800	1.38862		800	11.1586		800	17.2303
	810	1.36488		810	11.1307		810	17.2133
	820	1.3844		820	11.1452		820	17.2725
	830	1.31291		830	11.1599		830	17.2531
	840	1.25596		840	11.1567		840	17.2295
	850	1.22503		850	11.1818		850	17.2638
	860	1.09036		860	11.1303		860	17.2062
	870	1.04563		870	11.1262		870	17.2173
	880	1.16872		880	11.1206		880	17.1693
	890	1.26185		890	11.1313		890	17.1679
	900	1.29495		900	11.1083		900	17.2117
	910	1.22511		910	11.1625		910	17.2336
	920	1.25482		920	11.1342		920	17.2474
	930	1.23516		930	11.1478		930	17.2201
	940	1.20301		940	11.1121		940	17.1929
	950	1.21307		950	11.1745		950	17.2234
	960	1.14747		960	11.1496		960	17.2308
	970	1.0686		970	11.1222		970	17.2177
	980	1.07078		980	11.1041		980	17.1749
	990	1.09706		990	11.1295		990	17.2311
	1000	1.11198		1000	11.1583		1000	17.2321
	1010	1.19323		1010	11.1606		1010	17.2128
	1020	1.22435		1020	11.1727		1020	17.2763
	1030	1.34133		1030	11.1785		1030	17.2872
	1040	1.45488		1040	11.1361		1040	17.2571
	1050	1.54443		1050	11.16		1050	17.2251
	1060	1.43509		1060	11.1401		1060	17.2177
	1070	1.34272		1070	11.1144		1070	17.1963

## Sheet: Sheet4
Fig.4f
	Z (Angstorm)	[pY-Caprin1] (mg/ml)		Z (Angstorm)	[Na+] (mg/ml)		Z (Angstorm)	[Cl-] (mg/ml)
	-1160	0.189609		-1160	10.6086		-1160	16.325
	-1150	0.201915		-1150	10.6154		-1150	16.367
	-1140	0.222476		-1140	10.5915		-1140	16.3364
	-1130	0.240827		-1130	10.6171		-1130	16.3672
	-1120	0.259412		-1120	10.6279		-1120	16.3799
	-1110	0.278054		-1110	10.6253		-1110	16.3342
	-1100	0.271741		-1100	10.5973		-1100	16.3359
	-1090	0.216041		-1090	10.6092		-1090	16.3959
	-1080	0.1792		-1080	10.6138		-1080	16.3452
	-1070	0.169049		-1070	10.6286		-1070	16.3694
	-1060	0.184538		-1060	10.5849		-1060	16.3186
	-1050	0.220456		-1050	10.6087		-1050	16.3452
	-1040	0.194802		-1040	10.6062		-1040	16.3788
	-1030	0.163061		-1030	10.63		-1030	16.3916
	-1020	0.171291		-1020	10.6145		-1020	16.3267
	-1010	0.183114		-1010	10.6015		-1010	16.3486
	-1000	0.161963		-1000	10.6319		-1000	16.353
	-990	0.140082		-990	10.5918		-990	16.3345
	-980	0.151157		-980	10.5724		-980	16.3203
	-970	0.211771		-970	10.589		-970	16.3502
	-960	0.234022		-960	10.6088		-960	16.3305
	-950	0.263118		-950	10.6379		-950	16.3822
	-940	0.233983		-940	10.6154		-940	16.327
	-930	0.18258		-930	10.616		-930	16.3856
	-920	0.165831		-920	10.617		-920	16.3474
	-910	0.159574		-910	10.5647		-910	16.333
	-900	0.207502		-900	10.6422		-900	16.3725
	-890	0.187765		-890	10.6228		-890	16.3512
	-880	0.169351		-880	10.643		-880	16.3919
	-870	0.17347		-870	10.5845		-870	16.3655
	-860	0.169968		-860	10.6286		-860	16.3599
	-850	0.143844		-850	10.5786		-850	16.3242
	-840	0.117466		-840	10.6075		-840	16.3595
	-830	0.0968935		-830	10.6044		-830	16.3382
	-820	0.0920729		-820	10.6256		-820	16.3065
	-810	0.082342		-810	10.5734		-810	16.3355
	-800	0.0687467		-800	10.5955		-800	16.3513
	-790	0.0688853		-790	10.6068		-790	16.3507
	-780	0.0615564		-780	10.593		-780	16.3312
	-770	0.0685702		-770	10.568		-770	16.2649
	-760	0.056574		-760	10.595		-760	16.3499
	-750	0.0430363		-750	10.6226		-750	16.352
	-740	0.0405504		-740	10.6246		-740	16.3709
	-730	0.0333779		-730	10.5972		-730	16.3332
	-720	0.0313717		-720	10.6427		-720	16.3871
	-710	0.0428097		-710	10.6289		-710	16.3736
	-700	0.0432081		-700	10.6027		-700	16.3835
	-690	0.0376647		-690	10.6032		-690	16.3667
	-680	0.0545072		-680	10.6245		-680	16.3365
	-670	0.0665214		-670	10.5694		-670	16.2853
	-660	0.0556588		-660	10.6112		-660	16.3669
	-650	0.0367844		-650	10.6054		-650	16.3488
	-640	0.0456636		-640	10.6229		-640	16.3555
	-630	0.0516839		-630	10.5802		-630	16.3312
	-620	0.0527518		-620	10.6307		-620	16.3864
	-610	0.0424348		-610	10.6448		-610	16.3684
	-600	0.0281901		-600	10.5899		-600	16.3333
	-590	0.00528145		-590	10.6096		-590	16.3754
	-580	0.00403503		-580	10.6017		-580	16.3231
	-570	0.00891439		-570	10.6293		-570	16.43
	-560	0.0113819		-560	10.615		-560	16.3141
	-550	0.00810924		-550	10.6082		-550	16.3516
	-540	0.0129658		-540	10.5939		-540	16.3352
	-530	0.019111		-530	10.5946		-530	16.3401
	-520	0.0370654		-520	10.5976		-520	16.3489
	-510	0.0724455		-510	10.5924		-510	16.2855
	-500	0.104632		-500	10.5771		-500	16.335
	-490	0.147402		-490	10.6007		-490	16.3164
	-480	0.207768		-480	10.5905		-480	16.3522
	-470	0.264297		-470	10.5912		-470	16.2919
	-460	0.285406		-460	10.5859		-460	16.369
	-450	0.305235		-450	10.6316		-450	16.3397
	-440	0.338566		-440	10.6173		-440	16.3304
	-430	0.341276		-430	10.5541		-430	16.2974
	-420	0.293374		-420	10.6241		-420	16.3575
	-410	0.320084		-410	10.6233		-410	16.3675
	-400	0.367139		-400	10.5883		-400	16.3612
	-390	0.465217		-390	10.6412		-390	16.3832
	-380	0.554199		-380	10.628		-380	16.3896
	-370	0.646544		-370	10.5913		-370	16.3065
	-360	0.694569		-360	10.6435		-360	16.4092
	-350	0.861191		-350	10.6458		-350	16.3812
	-340	1.04807		-340	10.633		-340	16.4525
	-330	1.36316		-330	10.6318		-330	16.3552
	-320	1.68284		-320	10.651		-320	16.4102
	-310	1.86097		-310	10.6385		-310	16.3563
	-300	1.96574		-300	10.6376		-300	16.3894
	-290	2.11129		-290	10.6599		-290	16.4624
	-280	2.26875		-280	10.626		-280	16.3971
	-270	2.42996		-270	10.661		-270	16.425
	-260	2.37822		-260	10.7096		-260	16.3983
	-250	2.36635		-250	10.6689		-250	16.4683
	-240	2.16534		-240	10.6502		-240	16.4298
	-230	2.06691		-230	10.66		-230	16.4149
	-220	2.39571		-220	10.6519		-220	16.4517
	-210	3.72644		-210	10.6544		-210	16.5451
	-200	6.96504		-200	10.6948		-200	16.6972
	-190	13.7158		-190	10.6841		-190	16.9511
	-180	26.4292		-180	10.7809		-180	17.3015
	-170	46.9052		-170	10.9789		-170	17.7821
	-160	77.3718		-160	11.34		-160	18.3986
	-150	115.717		-150	11.8215		-150	18.9073
	-140	160.262		-140	12.4063		-140	19.4171
	-130	209.004		-130	13.0433		-130	20.1665
	-120	260.767		-120	13.7248		-120	20.7901
	-110	312.33		-110	14.477		-110	21.4361
	-100	363.507		-100	15.0731		-100	21.9735
	-90	410.299		-90	15.7529		-90	22.4923
	-80	450.312		-80	16.3701		-80	22.767
	-70	482.436		-70	16.885		-70	23.0267
	-60	505.273		-60	17.2106		-60	23.1364
	-50	518.48		-50	17.3797		-50	23.1774
	-40	520.398		-40	17.408		-40	23.2376
	-30	512.119		-30	17.2525		-30	23.2099
	-20	492.694		-20	16.9796		-20	23.1333
	-10	463.277		-10	16.5553		-10	22.9098
	0	425.118		0	15.9588		0	22.5367
	10	382.193		10	15.3893		10	22.1202
	20	333.711		20	14.7254		20	21.5867
	30	281.253		30	14.0773		30	20.9844
	40	227.668		40	13.3291		40	20.3997
	50	175.54		50	12.6127		50	19.8299
	60	127.69		60	11.9634		60	19.2165
	70	86.657		70	11.4408		70	18.5338
	80	53.7578		80	11.0557		80	17.9386
	90	30.6555		90	10.8654		90	17.5037
	100	15.9177		100	10.7259		100	17.0367
	110	7.39812		110	10.6681		110	16.7442
	120	3.09048		120	10.7014		120	16.5971
	130	1.28731		130	10.6457		130	16.4796
	140	0.533893		140	10.6457		140	16.3913
	150	0.25368		150	10.6445		150	16.4477
	160	0.171774		160	10.6112		160	16.3463
	170	0.143766		170	10.6329		170	16.3646
	180	0.152348		180	10.6005		180	16.3765
	190	0.18223		190	10.6033		190	16.3818
	200	0.215284		200	10.6425		200	16.3741
	210	0.252013		210	10.594		210	16.3321
	220	0.242877		220	10.6325		220	16.3614
	230	0.265913		230	10.6235		230	16.3779
	240	0.33355		240	10.6157		240	16.3683
	250	0.357307		250	10.6066		250	16.3427
	260	0.323205		260	10.6254		260	16.421
	270	0.355355		270	10.6155		270	16.3464
	280	0.409344		280	10.6377		280	16.3515
	290	0.455421		290	10.633		290	16.3949
	300	0.443915		300	10.6018		300	16.3555
	310	0.387927		310	10.6256		310	16.3206
	320	0.341135		320	10.5946		320	16.3598
	330	0.421504		330	10.6223		330	16.3808
	340	0.431353		340	10.6166		340	16.3803
	350	0.416466		350	10.6157		350	16.3697
	360	0.424515		360	10.6385		360	16.3365
	370	0.435945		370	10.5862		370	16.3321
	380	0.456304		380	10.6075		380	16.376
	390	0.439947		390	10.5945		390	16.3488
	400	0.419796		400	10.6246		400	16.3588
	410	0.446164		410	10.6519		410	16.376
	420	0.459188		420	10.6232		420	16.3725
	430	0.512728		430	10.6058		430	16.3664
	440	0.54638		440	10.638		440	16.3762
	450	0.548174		450	10.6233		450	16.4122
	460	0.461827		460	10.6435		460	16.3559
	470	0.449769		470	10.6291		470	16.413
	480	0.478608		480	10.611		480	16.3539
	490	0.555043		490	10.6314		490	16.392
	500	0.576484		500	10.6194		500	16.3196
	510	0.634584		510	10.5915		510	16.3782
	520	0.710626		520	10.6157		520	16.3207
	530	0.769745		530	10.6338		530	16.4032
	540	0.741715		540	10.6009		540	16.3544
	550	0.740716		550	10.6229		550	16.3214
	560	0.725619		560	10.6174		560	16.3689
	570	0.678767		570	10.6205		570	16.3976
	580	0.615545		580	10.628		580	16.365
	590	0.574192		590	10.5827		590	16.3381
	600	0.506406		600	10.6271		600	16.374
	610	0.540196		610	10.6494		610	16.3755
	620	0.532492		620	10.6024		620	16.3883
	630	0.493434		630	10.646		630	16.3718
	640	0.445132		640	10.6205		640	16.3754
	650	0.44596		650	10.5974		650	16.3665
	660	0.453111		660	10.6234		660	16.3739
	670	0.461844		670	10.627		670	16.3426
	680	0.458711		680	10.5797		680	16.3242
	690	0.485613		690	10.6504		690	16.3945
	700	0.493839		700	10.6233		700	16.3393
	710	0.441048		710	10.643		710	16.4482
	720	0.469605		720	10.6129		720	16.3565
	730	0.448096		730	10.5662		730	16.2957
	740	0.406196		740	10.6002		740	16.3149
	750	0.395398		750	10.6025		750	16.3264
	760	0.376553		760	10.5875		760	16.3096
	770	0.37348		770	10.5902		770	16.3523
	780	0.383499		780	10.5876		780	16.3301
	790	0.377355		790	10.6243		790	16.3702
	800	0.372419		800	10.6173		800	16.3438
	810	0.383543		810	10.6268		810	16.3444
	820	0.401731		820	10.6413		820	16.3889
	830	0.409713		830	10.5962		830	16.3877
	840	0.36748		840	10.6061		840	16.3502
	850	0.345825		850	10.6261		850	16.4006
	860	0.3642		860	10.604		860	16.2814
	870	0.358952		870	10.5913		870	16.3467
	880	0.335923		880	10.6174		880	16.3425
	890	0.326367		890	10.6225		890	16.3913
	900	0.395144		900	10.6441		900	16.4193
	910	0.428788		910	10.6356		910	16.3824
	920	0.378117		920	10.6189		920	16.3731
	930	0.346143		930	10.6174		930	16.3527
	940	0.333942		940	10.5813		940	16.313
	950	0.308898		950	10.6107		950	16.3419
	960	0.294748		960	10.6069		960	16.3707
	970	0.242738		970	10.6248		970	16.342
	980	0.238306		980	10.5908		980	16.3392
	990	0.20614		990	10.6145		990	16.3801
	1000	0.242749		1000	10.6314		1000	16.3578
	1010	0.196506		1010	10.6144		1010	16.3453
	1020	0.170148		1020	10.5984		1020	16.3764
	1030	0.162721		1030	10.6366		1030	16.3324
	1040	0.13702		1040	10.5775		1040	16.3524
	1050	0.175723		1050	10.5909		1050	16.3223
	1060	0.235547		1060	10.5989		1060	16.3193
	1070	0.219803		1070	10.6085		1070	16.3654
	1080	0.188684		1080	10.5675		1080	16.2698
	1090	0.172729		1090	10.6399		1090	16.3945
	1100	0.175561		1100	10.6102		1100	16.3643
	1110	0.22044		1110	10.6252		1110	16.389
	1120	0.220674		1120	10.6263		1120	16.3846
	1130	0.183644		1130	10.5874		1130	16.3127
	1140	0.192252		1140	10.6084		1140	16.3403
	1150	0.19915		1150	10.6241		1150	16.3833

## Sheet: Sheet5
Fig.4g
Z (Angstorm)	[Na+] (mM)		Z (Angstorm)	[Cl] (mM)
-1080	484.656		-1080	485.141
-1070	484.369		-1070	485.631
-1060	484.362		-1060	486.768
-1050	483.939		-1050	484.182
-1040	483.721		-1040	485.738
-1030	485.288		-1030	485.124
-1020	483.603		-1020	484.68
-1010	483.911		-1010	485.093
-1000	484.041		-1000	485.143
-990	483.895		-990	484.767
-980	484.733		-980	485.239
-970	483.94		-970	485.138
-960	483.641		-960	484.539
-950	486.064		-950	487.049
-940	485.727		-940	486.002
-930	484.766		-930	485.498
-920	484.053		-920	485.627
-910	484.4		-910	486.081
-900	485.329		-900	485.172
-890	483.899		-890	484.932
-880	483.557		-880	484.886
-870	482.48		-870	483.136
-860	483.631		-860	485.595
-850	483.635		-850	484.763
-840	483.415		-840	484.158
-830	484.213		-830	484.484
-820	485.146		-820	486.395
-810	482.741		-810	484.002
-800	485.001		-800	485.603
-790	485.397		-790	485.144
-780	485.424		-780	486.088
-770	483.971		-770	485.64
-760	484.137		-760	484.71
-750	483.289		-750	485.188
-740	486.065		-740	486.292
-730	484.592		-730	485.4
-720	483.318		-720	484.539
-710	484.896		-710	486.54
-700	483.673		-700	485.588
-690	485.169		-690	484.899
-680	484.694		-680	486.338
-670	485.222		-670	486.645
-660	484.476		-660	485.807
-650	485.307		-650	486.861
-640	485.081		-640	484.561
-630	483.59		-630	485.062
-620	483.17		-620	484.083
-610	485.746		-610	486.88
-600	484.313		-600	484.249
-590	484.377		-590	485.619
-580	484.146		-580	485.048
-570	484.643		-570	485.76
-560	484.103		-560	484.763
-550	484.303		-550	484.701
-540	483.332		-540	485.244
-530	484.973		-530	486.173
-520	485.048		-520	484.639
-510	484.377		-510	486.663
-500	485.086		-500	485.81
-490	484.149		-490	485.336
-480	483.671		-480	483.081
-470	484.177		-470	485.662
-460	483.486		-460	486.82
-450	485.753		-450	484.993
-440	484.631		-440	484.996
-430	484.49		-430	486.689
-420	483.88		-420	484.613
-410	483.434		-410	484.014
-400	484.929		-400	485.248
-390	483.462		-390	484.629
-380	486.131		-380	486.632
-370	483.731		-370	484.905
-360	485.148		-360	485.521
-350	484.592		-350	486.989
-340	485.039		-340	487.367
-330	486.81		-330	489.559
-320	483.622		-320	486.199
-310	483.617		-310	487.808
-300	482.442		-300	487.884
-290	483.616		-290	488.693
-280	483.529		-280	491.899
-270	483.99		-270	492.941
-260	483.584		-260	495.33
-250	485.706		-250	499.426
-240	482.686		-240	501.155
-230	481.694		-230	507.157
-220	480.979		-220	516.763
-210	478.142		-210	527.056
-200	476.067		-200	542.488
-190	472.959		-190	563.609
-180	466.864		-180	583.766
-170	461.13		-170	605.48
-160	454.388		-160	631.426
-150	449.732		-150	658.982
-140	442.72		-140	685.687
-130	437.303		-130	714.123
-120	432.379		-120	735.509
-110	425.398		-110	752.064
-100	423.332		-100	767.386
-90	421.227		-90	777.277
-80	420.382		-80	785.424
-70	420.253		-70	789.952
-60	419.638		-60	793.386
-50	419.403		-50	791.636
-40	419.139		-40	788.379
-30	421.246		-30	786.937
-20	420.009		-20	782.413
-10	421.131		-10	776.918
0	423.995		0	769.177
10	425.673		10	755.209
20	429.427		20	743.367
30	434.123		30	724.66
40	437.378		40	704.584
50	443.406		50	679.752
60	449.993		60	655.29
70	456.6		70	628.366
80	462.372		80	602.309
90	468.593		90	579.441
100	472.234		100	557.377
110	475.632		110	538.58
120	480.604		120	524.147
130	482.66		130	511.356
140	483.776		140	504.308
150	483.356		150	496.438
160	484.483		160	492.87
170	486.152		170	491.502
180	485.286		180	490.165
190	483.199		190	490.914
200	484.968		200	492.363
210	485.868		210	492.513
220	483.712		220	491.198
230	483.248		230	490.774
240	483.137		240	491.336
250	484.312		250	490.356
260	484.25		260	491.69
270	485.57		270	492.228
280	483.315		280	490.136
290	484.364		290	489.96
300	482.064		300	488.528
310	483.937		310	491.785
320	484.766		320	490.28
330	483.073		330	491.259
340	483.109		340	491.447
350	482.411		350	491.961
360	482.994		360	491.994
370	481.988		370	490.729
380	483.381		380	492.24
390	483.438		390	493.025
400	482.487		400	490.643
410	482.031		410	489.658
420	483.348		420	489.578
430	484.184		430	489.521
440	482.451		440	488.219
450	483.125		450	487.508
460	484.507		460	488.302
470	484.136		470	488.7
480	483.311		480	487.455
490	483.749		490	486.92
500	483.489		500	487.467
510	484.066		510	488.467
520	484.22		520	487.505
530	483.659		530	485.919
540	481.77		540	485.222
550	484.54		550	487.605
560	483.476		560	486.19
570	484.916		570	486.687
580	483.89		580	486.081
590	483.666		590	485.759
600	484.761		600	487.08
610	483.187		610	485.315
620	485.397		620	486.135
630	483.251		630	486.076
640	484.835		640	485.917
650	483.028		650	485.037
660	483.45		660	483.85
670	483.714		670	485.595
680	483.071		680	484.403
690	483.222		690	484.908
700	485.291		700	486.309
710	483.579		710	484.154
720	483.156		720	483.669
730	485.181		730	485.336
740	483.724		740	484.91
750	485.319		750	486.545
760	485.322		760	485.867
770	484.735		770	486.778
780	484.692		780	484.099
790	484.661		790	486.464
800	485.155		800	485.36
810	483.946		810	484.882
820	484.574		820	486.549
830	485.214		830	486.004
840	485.074		840	485.338
850	486.167		850	486.304
860	483.928		860	484.682
870	483.749		870	484.994
880	483.503		880	483.642
890	483.97		890	483.604
900	482.971		900	484.836
910	485.326		910	485.453
920	484.098		920	485.841
930	484.687		930	485.072
940	483.135		940	484.308
950	485.848		950	485.165
960	484.764		960	485.374
970	483.572		970	485.005
980	482.786		980	483.8
990	483.892		990	485.383
1000	485.143		1000	485.41
1010	485.245		1010	484.868
1020	485.768		1020	486.657
1030	486.02		1030	486.963
1040	484.179		1040	486.116
1050	485.217		1050	485.215
1060	484.353		1060	485.005
1070	483.235		1070	484.403

## Sheet: Sheet6
Fig.4h
	Z (Angstorm)	[Na+] (mM)		Z (Angstorm)	[Cl] (mM)
	-1160	461.244		-1160	459.858
	-1150	461.541		-1150	461.042
	-1140	460.499		-1140	460.18
	-1130	461.615		-1130	461.048
	-1120	462.084		-1120	461.407
	-1110	461.969		-1110	460.119
	-1100	460.752		-1100	460.167
	-1090	461.268		-1090	461.857
	-1080	461.467		-1080	460.429
	-1070	462.113		-1070	461.109
	-1060	460.213		-1060	459.679
	-1050	461.248		-1050	460.429
	-1040	461.137		-1040	461.374
	-1030	462.176		-1030	461.735
	-1020	461.499		-1020	459.906
	-1010	460.936		-1010	460.523
	-1000	462.255		-1000	460.648
	-990	460.514		-990	460.127
	-980	459.671		-980	459.727
	-970	460.39		-970	460.569
	-960	461.252		-960	460.014
	-950	462.519		-950	461.47
	-940	461.539		-940	459.917
	-930	461.567		-930	461.567
	-920	461.61		-920	460.49
	-910	459.335		-910	460.084
	-900	462.703		-900	461.197
	-890	461.862		-890	460.598
	-880	462.74		-880	461.744
	-870	460.196		-870	461
	-860	462.111		-860	460.841
	-850	459.938		-850	459.838
	-840	461.196		-840	460.832
	-830	461.062		-830	460.23
	-820	461.984		-820	459.338
	-810	459.711		-810	460.156
	-800	460.676		-800	460.6
	-790	461.163		-790	460.582
	-780	460.567		-780	460.033
	-770	459.477		-770	458.165
	-760	460.65		-760	460.56
	-750	461.853		-750	460.619
	-740	461.94		-740	461.153
	-730	460.748		-730	460.09
	-720	462.726		-720	461.61
	-710	462.126		-710	461.228
	-700	460.988		-700	461.507
	-690	461.01		-690	461.033
	-680	461.936		-680	460.182
	-670	459.538		-670	458.74
	-660	461.357		-660	461.04
	-650	461.102		-650	460.53
	-640	461.864		-640	460.718
	-630	460.008		-630	460.033
	-620	462.205		-620	461.589
	-610	462.818		-610	461.081
	-600	460.429		-600	460.092
	-590	461.289		-590	461.28
	-580	460.942		-580	459.804
	-570	462.145		-570	462.816
	-560	461.523		-560	459.552
	-550	461.226		-550	460.609
	-540	460.602		-540	460.145
	-530	460.635		-530	460.285
	-520	460.766		-520	460.532
	-510	460.54		-510	458.745
	-500	459.872		-500	460.14
	-490	460.901		-490	459.616
	-480	460.457		-480	460.626
	-470	460.488		-470	458.927
	-460	460.257		-460	461.098
	-450	462.242		-450	460.272
	-440	461.622		-440	460.013
	-430	458.872		-430	459.082
	-420	461.916		-420	460.773
	-410	461.884		-410	461.055
	-400	460.361		-400	460.878
	-390	462.663		-390	461.497
	-380	462.087		-380	461.678
	-370	460.493		-370	459.338
	-360	462.763		-360	462.23
	-350	462.86		-350	461.442
	-340	462.305		-340	463.452
	-330	462.253		-330	460.711
	-320	463.089		-320	462.258
	-310	462.545		-310	460.74
	-300	462.506		-300	461.672
	-290	463.475		-290	463.73
	-280	462.001		-280	461.89
	-270	463.521		-270	462.676
	-260	465.633		-260	461.925
	-250	463.864		-250	463.896
	-240	463.05		-240	462.811
	-230	463.478		-230	462.391
	-220	463.124		-220	463.428
	-210	463.233		-210	466.059
	-200	464.991		-200	470.343
	-190	464.526		-190	477.495
	-180	468.734		-180	487.367
	-170	477.342		-170	500.903
	-160	493.045		-160	518.271
	-150	513.979		-150	532.6
	-140	539.404		-140	546.962
	-130	567.099		-130	568.071
	-120	596.73		-120	585.636
	-110	629.436		-110	603.835
	-100	655.354		-100	618.971
	-90	684.909		-90	633.586
	-80	711.745		-80	641.324
	-70	734.129		-70	648.641
	-60	748.288		-60	651.73
	-50	755.641		-50	652.885
	-40	756.87		-40	654.58
	-30	750.107		-30	653.799
	-20	738.243		-20	651.643
	-10	719.794		-10	645.347
	0	693.86		0	634.837
	10	669.099		10	623.104
	20	640.236		20	608.076
	30	612.055		30	591.111
	40	579.526		40	574.64
	50	548.377		50	558.588
	60	520.146		60	541.31
	70	497.428		70	522.079
	80	480.683		80	505.314
	90	472.409		90	493.063
	100	466.341		100	479.906
	110	463.829		110	471.668
	120	465.277		120	467.523
	130	462.855		130	464.213
	140	462.858		140	461.726
	150	462.805		150	463.316
	160	461.359		160	460.46
	170	462.299		170	460.976
	180	460.892		180	461.309
	190	461.012		190	461.459
	200	462.718		200	461.241
	210	460.608		210	460.059
	220	462.281		220	460.886
	230	461.892		230	461.348
	240	461.554		240	461.079
	250	461.156		250	460.357
	260	461.975		260	462.564
	270	461.543		270	460.462
	280	462.51		280	460.606
	290	462.305		290	461.827
	300	460.949		300	460.718
	310	461.982		310	459.734
	320	460.634		320	460.84
	330	461.838		330	461.431
	340	461.591		340	461.418
	350	461.551		350	461.118
	360	462.543		360	460.184
	370	460.27		370	460.06
	380	461.196		380	461.297
	390	460.63		390	460.53
	400	461.938		400	460.81
	410	463.126		410	461.297
	420	461.877		420	461.197
	430	461.123		430	461.026
	440	462.521		440	461.3
	450	461.884		450	462.315
	460	462.763		460	460.729
	470	462.133		470	462.337
	480	461.346		480	460.672
	490	462.237		490	461.748
	500	461.711		500	459.707
	510	460.499		510	461.357
	520	461.552		520	459.738
	530	462.338		530	462.061
	540	460.909		540	460.687
	550	461.866		550	459.756
	560	461.626		560	461.096
	570	461.763		570	461.904
	580	462.085		580	460.985
	590	460.119		590	460.228
	600	462.049		600	461.239
	610	463.015		610	461.282
	620	460.973		620	461.641
	630	462.871		630	461.177
	640	461.761		640	461.28
	650	460.755		650	461.028
	660	461.886		660	461.238
	670	462.043		670	460.355
	680	459.988		680	459.836
	690	463.06		690	461.818
	700	461.884		700	460.263
	710	462.74		710	463.328
	720	461.431		720	460.748
	730	459.399		730	459.034
	740	460.879		740	459.574
	750	460.977		750	459.898
	760	460.326		760	459.427
	770	460.444		770	460.628
	780	460.329		780	460.003
	790	461.925		790	461.133
	800	461.621		800	460.388
	810	462.036		810	460.407
	820	462.665		820	461.659
	830	460.704		830	461.626
	840	461.135		840	460.569
	850	462.002		850	461.987
	860	461.043		860	458.631
	870	460.493		870	460.469
	880	461.628		880	460.353
	890	461.848		890	461.728
	900	462.787		900	462.514
	910	462.418		910	461.475
	920	461.691		920	461.215
	930	461.628		930	460.641
	940	460.054		940	459.521
	950	461.337		950	460.335
	960	461.17		960	461.145
	970	461.947		970	460.337
	980	460.468		980	460.259
	990	461.501		990	461.411
	1000	462.235		1000	460.784
	1010	461.495		1010	460.431
	1020	460.798		1020	461.308
	1030	462.462		1030	460.068
	1040	459.892		1040	460.631
	1050	460.473		1050	459.784
	1060	460.82		1060	459.697
	1070	461.241		1070	460.998
	1080	459.455		1080	458.305
	1090	462.604		1090	461.818
	1100	461.314		1100	460.967
	1110	461.966		1110	461.663
	1120	462.012		1120	461.538
	1130	460.32		1130	459.511
	1140	461.233		1140	460.291
	1150	461.918		1150	461.501
