# Supplementary material for: Electrostatics of salt-dependent reentrant phase behaviors highlights diverse roles of ATP in biomolecular condensates
Source: eLife. 2025 Mar 3;13:RP100284. doi: 10.7554/eLife.100284 (PMC11875540; doi:10.7554/eLife.100284)
Supplement: Figure 6—source data 1. [file elife-100284-fig6-data1.xlsx]

## Sheet: Sheet1
	(a)			(c)
	r / Å	rho / Å^3		Bin mid (bin width = 2Å)	Average event count per frame
	0.1611	0		R / Å	Bridge	Intermediate	Neutralizing
	0.2686	0		7	13.417	114.985	248.254
	0.376	0		9	294.223	359.103	216.836
	0.4834	0		11	1000.12	342.7	0
	0.5908	0		13	1497.05	0	0
	0.6982	0		15	1236.35	0	0
	0.8057	0		17	671.373	0	0
	0.9131	0		19	245.001	0	0
	1.0205	0		21	38.674	0	0
	1.1279	0
	1.2354	0
	1.3428	0
	1.4502	0
	1.5576	0
	1.665	0
	1.7725	0
	1.8799	0
	1.9873	0
	2.0947	0
	2.2021	0
	2.3096	0
	2.417	0
	2.5244	0
	2.6318	0
	2.7393	0
	2.8467	0
	2.9541	0
	3.0615	0
	3.1689	0
	3.2764	0
	3.3838	0
	3.4912	0
	3.5986	0
	3.7061	0
	3.8135	0
	3.9209	0
	4.0283	0
	4.1357	0
	4.2432	0
	4.3506	0
	4.458	0
	4.5654	0
	4.6729	0
	4.7803	0
	4.8877	0.0006
	4.9951	0.0054
	5.1025	0.0341
	5.21	0.1298
	5.3174	0.3366
	5.4248	0.6595
	5.5322	1.0606
	5.6396	1.47
	5.7471	1.8219
	5.8545	2.0765
	5.9619	2.2353
	6.0693	2.3076
	6.1768	2.313
	6.2842	2.2781
	6.3916	2.1857
	6.499	2.0962
	6.6064	1.992
	6.7139	1.8865
	6.8213	1.7844
	6.9287	1.6865
	7.0361	1.5929
	7.1436	1.5064
	7.251	1.4319
	7.3584	1.3607
	7.4658	1.2942
	7.5732	1.2394
	7.6807	1.1889
	7.7881	1.1405
	7.8955	1.0991
	8.0029	1.0645
	8.1104	1.0276
	8.2178	1.0012
	8.3252	0.9695
	8.4326	0.946
	8.54	0.9204
	8.6475	0.9018
	8.7549	0.8819
	8.8623	0.8623
	8.9697	0.8408
	9.0771	0.8256
	9.1846	0.8056
	9.292	0.7881
	9.3994	0.7738
	9.5068	0.7571
	9.6143	0.7485
	9.7217	0.7362
	9.8291	0.7242
	9.9365	0.7135
	10.0439	0.7048
	10.1514	0.6975
	10.2588	0.6897
	10.3662	0.6846
	10.4736	0.6813
	10.5811	0.6764
	10.6885	0.6735
	10.7959	0.6733
	10.9033	0.6743
	11.0107	0.6711
	11.1182	0.6711
	11.2256	0.6722
	11.333	0.6738
	11.4404	0.6749
	11.5479	0.6765
	11.6553	0.6798
	11.7627	0.6818
	11.8701	0.684
	11.9775	0.6883
	12.085	0.6899
	12.1924	0.6917
	12.2998	0.6962
	12.4072	0.6973
	12.5146	0.6992
	12.6221	0.7011
	12.7295	0.704
	12.8369	0.7046
	12.9443	0.7062
	13.0518	0.7076
	13.1592	0.709
	13.2666	0.7102
	13.374	0.7116
	13.4814	0.71
	13.5889	0.7112
	13.6963	0.7129
	13.8037	0.7136
	13.9111	0.7139
	14.0186	0.716
	14.126	0.7144
	14.2334	0.7135
	14.3408	0.7157
	14.4482	0.7142
	14.5557	0.7156
	14.6631	0.7157
	14.7705	0.7168
	14.8779	0.7153
	14.9854	0.7149
	15.0928	0.7154
	15.2002	0.7186
	15.3076	0.7226
	15.415	0.7258
	15.5225	0.7289
	15.6299	0.732
	15.7373	0.7358
	15.8447	0.7397
	15.9521	0.7404
	16.0596	0.7434
	16.167	0.7451
	16.2744	0.7488
	16.3818	0.7505
	16.4893	0.7532
	16.5967	0.7544
	16.7041	0.7555
	16.8115	0.7576
	16.9189	0.7587
	17.0264	0.7598
	17.1338	0.7623
	17.2412	0.7608
	17.3486	0.7629
	17.4561	0.7648
	17.5635	0.7656
	17.6709	0.7665
	17.7783	0.7664
	17.8857	0.7667
	17.9932	0.7662
	18.1006	0.7669
	18.208	0.7676
	18.3154	0.7671
	18.4229	0.7671
	18.5303	0.7687
	18.6377	0.7674
	18.7451	0.7664
	18.8525	0.765
	18.96	0.7652
	19.0674	0.7649
	19.1748	0.7651
	19.2822	0.7637
	19.3896	0.7636
	19.4971	0.7614
	19.6045	0.7598
	19.7119	0.7604
	19.8193	0.7595
	19.9268	0.7572
	20.0342	0.7563
	20.1416	0.7547
	20.249	0.7533
	20.3564	0.7528
	20.4639	0.7525
	20.5713	0.7512
	20.6787	0.7491
	20.7861	0.7474
	20.8936	0.7464
	21.001	0.7457
	21.1084	0.7434
	21.2158	0.7421
	21.3232	0.7413
	21.4307	0.7402
	21.5381	0.7396
	21.6455	0.7387
	21.7529	0.7368
	21.8604	0.7362
	21.9678	0.7349
	22.0752	0.7347
	22.1826	0.7337
	22.29	0.7312
	22.3975	0.7301
	22.5049	0.7298
	22.6123	0.7291
	22.7197	0.7288
	22.8271	0.7275
	22.9346	0.7274
	23.042	0.7262
	23.1494	0.726
	23.2568	0.7268
	23.3643	0.7256
	23.4717	0.7239
	23.5791	0.7239
	23.6865	0.7251
	23.7939	0.723
	23.9014	0.7229
	24.0088	0.7221
	24.1162	0.7213
	24.2236	0.7225
	24.3311	0.7233
	24.4385	0.7225
	24.5459	0.7216
	24.6533	0.7212
	24.7607	0.7209
	24.8682	0.7221
	24.9756	0.7213
	25.083	0.7216
	25.1904	0.7214
	25.2979	0.7214
	25.4053	0.7214
	25.5127	0.7207
	25.6201	0.7205
	25.7275	0.7217
	25.835	0.7214
	25.9424	0.7215
	26.0498	0.7214
	26.1572	0.7207
	26.2646	0.7215
	26.3721	0.7207
	26.4795	0.7212
	26.5869	0.7218
	26.6943	0.7205
	26.8018	0.7222
	26.9092	0.7221
	27.0166	0.7204
	27.124	0.7212
	27.2314	0.7204
	27.3389	0.7204
	27.4463	0.7206
	27.5537	0.7211
	27.6611	0.7206
	27.7686	0.7214
	27.876	0.7212
	27.9834	0.7211
	28.0908	0.721
	28.1982	0.7208
	28.3057	0.7202
	28.4131	0.7208
	28.5205	0.7203
	28.6279	0.7201
	28.7354	0.72
	28.8428	0.7201
	28.9502	0.721
	29.0576	0.7211
	29.165	0.7197
	29.2725	0.7198
	29.3799	0.7191
	29.4873	0.7193
	29.5947	0.7198
	29.7021	0.7193
	29.8096	0.7198
	29.917	0.7188
	30.0244	0.7187
	30.1318	0.7187
	30.2393	0.7179
	30.3467	0.718
	30.4541	0.7181
	30.5615	0.7176
	30.6689	0.7172
	30.7764	0.7171
	30.8838	0.7176
	30.9912	0.7169
	31.0986	0.7164
	31.2061	0.7161
	31.3135	0.7156
	31.4209	0.7151
	31.5283	0.7158
	31.6357	0.7152
	31.7432	0.7147
	31.8506	0.714
	31.958	0.7147
	32.0654	0.7148
	32.1729	0.714
	32.2803	0.7137
	32.3877	0.7125
	32.4951	0.713
	32.6025	0.7121
	32.71	0.7132
	32.8174	0.7125
	32.9248	0.712
	33.0322	0.7112
	33.1396	0.7118
	33.2471	0.7116
	33.3545	0.7113
	33.4619	0.7112
	33.5693	0.7096
	33.6768	0.7103
	33.7842	0.71
	33.8916	0.7095
	33.999	0.7097
	34.1064	0.7097
	34.2139	0.7088
	34.3213	0.7082
	34.4287	0.7089
	34.5361	0.7076
	34.6436	0.7077
	34.751	0.7081
	34.8584	0.7077
	34.9658	0.7078
	35.0732	0.7075
	35.1807	0.7063
	35.2881	0.7066
	35.3955	0.7063
	35.5029	0.7064
	35.6104	0.7058
	35.7178	0.7061
	35.8252	0.7059
	35.9326	0.7059
	36.04	0.7057
	36.1475	0.7052
	36.2549	0.7044
	36.3623	0.7051
	36.4697	0.7042
	36.5771	0.7049
	36.6846	0.7047
	36.792	0.7041
	36.8994	0.7043
	37.0068	0.7041
	37.1143	0.7037
	37.2217	0.7033
	37.3291	0.7038
	37.4365	0.7031
	37.5439	0.7029
	37.6514	0.7023
	37.7588	0.7022
	37.8662	0.7019
	37.9736	0.7022
	38.0811	0.7018
	38.1885	0.702
	38.2959	0.7017
	38.4033	0.7015
	38.5107	0.7014
	38.6182	0.7013
	38.7256	0.7007
	38.833	0.701
	38.9404	0.7005
	39.0479	0.7011
	39.1553	0.7009
	39.2627	0.7002
	39.3701	0.7004
	39.4775	0.6997
	39.585	0.6996
	39.6924	0.6997
	39.7998	0.6992
	39.9072	0.6995
	40.0146	0.6992
	40.1221	0.6989
	40.2295	0.6981
	40.3369	0.6984
	40.4443	0.6984
	40.5518	0.6982
	40.6592	0.6976
	40.7666	0.6978
	40.874	0.697
	40.9814	0.6975
	41.0889	0.6968
	41.1963	0.6968
	41.3037	0.6969
	41.4111	0.6965
	41.5186	0.6963
	41.626	0.6967
	41.7334	0.696
	41.8408	0.6959
	41.9482	0.6959
	42.0557	0.6957
	42.1631	0.6957
	42.2705	0.6955
	42.3779	0.6948
	42.4854	0.695
	42.5928	0.6944
	42.7002	0.6945
	42.8076	0.6941
	42.915	0.6933
	43.0225	0.6943
	43.1299	0.6942
	43.2373	0.6935
	43.3447	0.693
	43.4521	0.6924
	43.5596	0.6931
	43.667	0.6927
	43.7744	0.6925
	43.8818	0.692
	43.9893	0.6924
	44.0967	0.6914
	44.2041	0.6918
	44.3115	0.6914
	44.4189	0.6913
	44.5264	0.6909
	44.6338	0.6908
	44.7412	0.6905
	44.8486	0.6902
	44.9561	0.6903
	45.0635	0.6898
	45.1709	0.6897
	45.2783	0.6897
	45.3857	0.6895
	45.4932	0.6892
	45.6006	0.6893
	45.708	0.6884
	45.8154	0.6889
	45.9229	0.6884
	46.0303	0.6881
	46.1377	0.6883
	46.2451	0.6879
	46.3525	0.6878
	46.46	0.6874
	46.5674	0.6871
	46.6748	0.6877
	46.7822	0.6865
	46.8896	0.6866
	46.9971	0.6866
	47.1045	0.6859
	47.2119	0.6863
	47.3193	0.6863
	47.4268	0.6855
	47.5342	0.6856
	47.6416	0.6858
	47.749	0.685
	47.8564	0.685
	47.9639	0.6845
	48.0713	0.6846
	48.1787	0.6842
	48.2861	0.6837
	48.3936	0.6842
	48.501	0.6839
	48.6084	0.6839
	48.7158	0.6833
	48.8232	0.6834
	48.9307	0.6833
	49.0381	0.683
	49.1455	0.6824
	49.2529	0.6827
	49.3604	0.6824
	49.4678	0.6821
	49.5752	0.6816
	49.6826	0.6818
	49.79	0.6811
	49.8975	0.6813
	50.0049	0.6808
	50.1123	0.6805
	50.2197	0.6806
	50.3271	0.6804
	50.4346	0.6801
	50.542	0.6801
	50.6494	0.6798
	50.7568	0.6794
	50.8643	0.6796
	50.9717	0.6795
	51.0791	0.6788
	51.1865	0.6789
	51.2939	0.6785
	51.4014	0.6787
	51.5088	0.6777
	51.6162	0.6778
	51.7236	0.6777
	51.8311	0.677
	51.9385	0.677
	52.0459	0.6772
	52.1533	0.6771
	52.2607	0.6768
	52.3682	0.6768
	52.4756	0.6768
	52.583	0.6759
	52.6904	0.6759
	52.7979	0.6754
	52.9053	0.6761
	53.0127	0.6751
	53.1201	0.6752
	53.2275	0.675
	53.335	0.675
	53.4424	0.6744
	53.5498	0.6742
	53.6572	0.674
	53.7646	0.6738
	53.8721	0.6736
	53.9795	0.6735
	54.0869	0.673
	54.1943	0.6729
	54.3018	0.6727
	54.4092	0.6726
	54.5166	0.6725
	54.624	0.6724
	54.7314	0.6721
	54.8389	0.6721
	54.9463	0.6715
	55.0537	0.6714
