# Supplementary material for: Electrostatics of salt-dependent reentrant phase behaviors highlights diverse roles of ATP in biomolecular condensates
Source: eLife. 2025 Mar 3;13:RP100284. doi: 10.7554/eLife.100284 (PMC11875540; doi:10.7554/eLife.100284)
Supplement: Figure 7—source data 1. [file elife-100284-fig7-data1.xlsx]

## Sheet: Sheet1
15Rto15K 0 mM [NaCl]					15Rto15K 200 mM [NaCl]					15Rto15K 480 mM [NaCl]					15Rto15K 960 mM [NaCl]
dilute phase		condensed phase			dilute phase		condensed phase			dilute phase		condensed phase			dilute phase		condensed phase
protein density (mg/ml)	T/T0_cr	protein density (mg/ml)	T/T0_cr		protein density (mg/ml)	T/T0_cr	protein density (mg/ml)	T/T0_cr		protein density (mg/ml)	T/T0_cr	protein density (mg/ml)	T/T0_cr		protein density (mg/ml)	T/T0_cr	protein density (mg/ml)	T/T0_cr
0.5	0.674	575	0.674		0.1	0.829	375	0.829		0.6	0.829	442	0.829		1.2	0.829	397	0.829
2.2	0.725	475	0.725		0.2	0.881	310	0.881		1.5	0.933	302	0.933		4.1	0.933	245	0.933
9.1	0.751	317	0.751		0.3	0.933	175	0.933		2.3	0.984	191	0.984		15	0.984	150	0.984
147.3	0.765	147.3	0.765		83	0.944	83	0.944		92.7	1.01	92.7	1.01		79.2	0.995	79.2	0.995
Note: the protein density and the T/T0_cr value provided above are simulated data points at 0, 200, 480, and 960 mM [NaCl]

## Sheet: Sheet2
4Rto4K_N 200 mM [NaCl]					4Rto4K_N 480 mM [NaCl]					4Rto4K_N 960 mM [NaCl]
dilute phase		condensed phase			dilute phase		condensed phase			dilute phase		condensed phase
protein density (mg/ml)	T/T0_cr	protein density (mg/ml)	T/T0_cr		protein density (mg/ml)	T/T0_cr	protein density (mg/ml)	T/T0_cr		protein density (mg/ml)	T/T0_cr	protein density (mg/ml)	T/T0_cr
1.1	0.933	280	0.933		1.2	0.933	490	0.933		1.4	0.933	430	0.933
1.8	1.036	267	1.036		2.4	1.036	360	1.036		2.4	1.036	305	1.036
2.3	1.088	214	1.088		3.4	1.088	278	1.088		5.8	1.088	200	1.088
91.2	1.098	91.2	1.098		122	1.12	122	1.12		97.6	1.104	97.6	1.104
Note: the protein density and the T/T0_cr value provided above are simulated data points at 200, 480, and 960 mM [NaCl]

## Sheet: Sheet3
4Rto4K_M 200 mM [NaCl]					4Rto4K_M 480 mM [NaCl]					4Rto4K_M 960 mM [NaCl]
dilute phase		condensed phase			dilute phase		condensed phase			dilute phase		condensed phase
protein density (mg/ml)	T/T0_cr	protein density (mg/ml)	T/T0_cr		protein density (mg/ml)	T/T0_cr	protein density (mg/ml)	T/T0_cr		protein density (mg/ml)	T/T0_cr	protein density (mg/ml)	T/T0_cr
1.1	0.933	480	0.933		1.4	0.933	567	0.933		1.1	0.933	482	0.933
1.6	1.036	294	1.036		2.1	1.036	453	1.036		2.1	1.036	370	1.036
2.4	1.088	226	1.088		3.3	1.14	254	1.14		7.1	1.088	277	1.088
96.9	1.105	96.9	1.105		121.7	1.159	121.7	1.159		127	1.12	128	1.12
Note: the protein density and the T/T0_cr value provided above are simulated data points at 200, 480, and 960 mM [NaCl]

## Sheet: Sheet4
4Rto4K_C 200 mM [NaCl]					4Rto4K_C 480 mM [NaCl]					4Rto4K_C 960 mM [NaCl]
dilute phase		condensed phase			dilute phase		condensed phase			dilute phase		condensed phase
protein density (mg/ml)	T/T0_cr	protein density (mg/ml)	T/T0_cr		protein density (mg/ml)	T/T0_cr	protein density (mg/ml)	T/T0_cr		protein density (mg/ml)	T/T0_cr	protein density (mg/ml)	T/T0_cr
1.1	0.933	295	0.933		1.1	0.933	473	0.933		1.5	0.933	405	0.933
1.5	1.036	246	1.036		2.2	1.036	375	1.036		2.1	1.036	300	1.036
2.1	1.088	197	1.088		3.4	1.088	260	1.088		5.01	1.088	235	1.088
84.4	1.098	84.4	1.098		122.9	1.119	122.9	1.119		103.8	1.104	103.8	1.104
Note: the protein density and the T/T0_cr value provided above are simulated data points at 200, 480, and 960 mM [NaCl]
