# Supplementary material for: Electrostatics of salt-dependent reentrant phase behaviors highlights diverse roles of ATP in biomolecular condensates
Source: eLife. 2025 Mar 3;13:RP100284. doi: 10.7554/eLife.100284 (PMC11875540; doi:10.7554/eLife.100284)
Supplement: Figure 8—source data 1. [file elife-100284-fig8-data1.xlsx]

## Sheet: Fig.8b-e
	Fig. 8b	Caprin1 Self-Correlation at [ATP-Mg] = 0.0001, 0.03, 0.5 b^{-3}
r/b	0.0001(Avg)	0.0001(Std)	0.03(Avg)	0.03(Std)	0.5(Avg)	0.5(Std)
0	18.4065	0.744511	21.8563	0.774994	16.9527	0.110775
0.408248	14.8479	0.714593	18.1807	0.738743	13.3615	0.102393
0.57735	12.4326	0.618536	15.6604	0.718064	10.9461	0.0985283
0.707107	10.7427	0.546079	13.8924	0.703858	9.28311	0.0967836
0.816497	9.38002	0.564807	12.586	0.709754	8.0732	0.0937869
0.912871	8.60656	0.483353	11.6264	0.679975	7.22257	0.0927223
1	7.95979	0.445142	10.8773	0.657924	6.57668	0.0921809
1.1547	7.01771	0.354594	9.7563	0.638947	5.65221	0.0893183
1.22474	6.62137	0.371298	9.32214	0.619144	5.314	0.0883176
1.29099	6.35374	0.451802	8.95159	0.617942	5.02474	0.0859921
1.35401	6.08175	0.406805	8.59857	0.61178	4.76972	0.0843741
1.41421	5.78385	0.378402	8.27661	0.590943	4.54734	0.0846842
1.47196	5.65709	0.384245	7.99387	0.599886	4.34458	0.0815853
1.52753	5.40988	0.33925	7.72948	0.589476	4.16674	0.0795954
1.63299	5.05455	0.553745	7.29131	0.564702	3.84725	0.0768372
1.68325	4.91784	0.428442	7.05879	0.562017	3.71893	0.0753536
1.73205	4.80228	0.45948	6.84838	0.565715	3.59301	0.0736381
1.77951	4.65691	0.311176	6.65272	0.568978	3.48086	0.0720403
1.82574	4.57601	0.463206	6.49009	0.54182	3.37218	0.0714455
1.87083	4.42154	0.426419	6.31433	0.533804	3.27456	0.0691372
1.91485	4.29681	0.357702	6.147	0.536323	3.18539	0.0692635
2	4.04352	0.388305	5.85159	0.514077	3.01715	0.0645789
2.04124	4.0432	0.395249	5.72281	0.515099	2.94054	0.0645203
2.08167	3.93557	0.418097	5.59429	0.497834	2.8695	0.0632861
2.12132	3.8286	0.539926	5.46832	0.481453	2.80257	0.0624807
2.19848	3.66394	0.422502	5.2179	0.463199	2.67999	0.0595215
2.23607	3.60644	0.519899	5.11855	0.449914	2.62355	0.058673
2.3094	3.56275	0.333944	4.89689	0.467832	2.51993	0.0565837
2.34521	3.41364	0.389941	4.79709	0.432528	2.47085	0.0544679
2.38048	3.3605	0.402862	4.69154	0.410354	2.42368	0.054067
2.41523	3.31262	0.409172	4.60953	0.399901	2.38066	0.0535789
2.44949	3.18654	0.376845	4.5157	0.389176	2.33577	0.053271
2.48328	3.13944	0.606932	4.43609	0.400597	2.29294	0.0572472
2.51661	3.09048	0.468652	4.33973	0.377046	2.25804	0.0506291
2.58199	3.01199	0.520567	4.17943	0.373096	2.18712	0.0519452
2.61406	2.98314	0.447975	4.1028	0.356093	2.15294	0.0481198
2.64575	3.01238	0.349352	4.04045	0.349051	2.12066	0.0472862
2.67706	2.82313	0.385611	3.94918	0.325322	2.08617	0.0440834
2.70801	2.80835	0.530975	3.88609	0.342376	2.06033	0.0442747
2.73861	2.80157	0.359285	3.81892	0.314701	2.02908	0.0447479
2.76887	2.76251	0.433885	3.75062	0.318698	2.00287	0.0446642
2.82843	2.56648	0.398264	3.60965	0.261649	1.94378	0.0397723
2.85774	2.60804	0.441212	3.56383	0.302877	1.9235	0.0412184
2.88675	2.59756	0.404214	3.50285	0.282783	1.89718	0.0414623
2.91548	2.61674	0.479089	3.45216	0.28381	1.87597	0.0428798
2.94392	2.6595	0.393615	3.40466	0.285051	1.85205	0.0417418
2.97209	2.55229	0.429625	3.33993	0.278745	1.831	0.0408256
3	2.44688	0.44844	3.27412	0.271839	1.80899	0.0383916
3.05505	2.38632	0.350361	3.17892	0.252542	1.76614	0.0368457
3.08221	2.30812	0.406279	3.12521	0.242266	1.74697	0.0346418
3.10913	2.35771	0.460505	3.08071	0.254608	1.73023	0.0379989
3.13581	2.29122	0.420293	3.0311	0.238414	1.71011	0.0351058
3.18852	2.26727	0.345854	2.93607	0.226588	1.67222	0.0343285
3.21455	2.25307	0.407114	2.90907	0.223189	1.65754	0.0343034
3.26599	2.32064	0.816726	2.82216	0.236134	1.63022	0.0397005
3.2914	2.19485	0.419376	2.77285	0.20509	1.60995	0.0336037
3.31662	2.13855	0.402464	2.72639	0.204175	1.59473	0.0329115
3.34166	2.02492	0.417461	2.69673	0.206752	1.57715	0.0316401
3.3665	2.05792	0.405437	2.63515	0.206531	1.56612	0.0307652
3.39116	2.04409	0.444099	2.6116	0.209223	1.55293	0.0311794
3.41565	1.96929	0.302969	2.5644	0.174917	1.53297	0.0291072
3.4641	2.01151	0.464612	2.51444	0.190979	1.51336	0.0300366
3.48807	1.99694	0.416318	2.47218	0.178817	1.49924	0.030494
3.51188	1.92003	0.406529	2.43589	0.18145	1.48535	0.0291965
3.53553	1.94693	0.349018	2.40335	0.16364	1.47243	0.0308311
3.55903	1.90029	0.32444	2.35065	0.151199	1.45883	0.0278156
3.58236	1.81797	0.328092	2.32899	0.167843	1.44786	0.0258064
3.60555	1.83934	0.326063	2.30303	0.155207	1.43582	0.02873
3.65148	1.85422	0.438619	2.25741	0.165125	1.41821	0.027166
3.67423	1.78602	0.346372	2.20613	0.149622	1.40485	0.0262814
3.69685	1.83567	0.455784	2.18957	0.165482	1.4024	0.02767
3.71932	1.75267	0.338051	2.14897	0.142347	1.38643	0.0255193
3.74166	1.68968	0.343034	2.13619	0.161701	1.37416	0.025613
3.76386	1.79357	0.389728	2.10758	0.150286	1.37162	0.0270603
3.78594	1.72623	0.312928	2.06587	0.139108	1.35791	0.0247415
3.82971	1.59685	0.239996	2.00558	0.114477	1.32996	0.0224351
3.85141	1.63889	0.318537	1.99119	0.130959	1.32787	0.0239949
3.87298	1.63012	0.301831	1.96365	0.121072	1.31907	0.0231039
3.89444	1.6674	0.439588	1.96322	0.148174	1.31811	0.0222204
3.937	1.5538	0.290321	1.89258	0.124957	1.29257	0.0242286
3.95811	1.55037	0.294653	1.87165	0.118702	1.28562	0.0205077
4	1.44397	0.278349	1.8147	0.120153	1.26666	0.0215104
4.02078	1.52743	0.231484	1.80113	0.0983976	1.25934	0.0179505
4.04145	1.50105	0.278431	1.78373	0.109733	1.25534	0.0214012
4.06202	1.46109	0.222558	1.75136	0.100296	1.24519	0.0204853
4.08248	1.55751	0.272092	1.72759	0.106262	1.24396	0.025204
4.10284	1.47483	0.223887	1.7205	0.0982508	1.23441	0.0203963
4.12311	1.51417	0.252948	1.68911	0.109617	1.23327	0.0211158
4.16333	1.44535	0.231296	1.65826	0.100463	1.2167	0.0199936
4.1833	1.41618	0.274767	1.64834	0.102631	1.21213	0.0171735
4.20317	1.39864	0.263255	1.63957	0.0994506	1.20307	0.0170946
4.22295	1.38178	0.214789	1.59555	0.0804241	1.19369	0.0189614
4.24264	1.4214	0.281151	1.59631	0.102974	1.19302	0.0159006
4.26224	1.35257	0.22068	1.57027	0.0825184	1.18297	0.017
4.28174	1.34998	0.207861	1.56213	0.0804848	1.17665	0.0159421
4.33974	1.33699	0.235425	1.51115	0.0888521	1.16236	0.0166723
4.3589	1.24921	0.146366	1.45532	0.0606052	1.14611	0.0186682
4.37798	1.2505	0.169986	1.47412	0.0963649	1.14737	0.0162481
4.39697	1.23779	0.20533	1.45875	0.0666697	1.14098	0.0145589
4.41588	1.29185	0.220121	1.43286	0.0735513	1.1386	0.0172613
4.43471	1.28423	0.237827	1.42859	0.0794467	1.1346	0.0169568
4.47214	1.28985	0.269252	1.43231	0.0958433	1.13042	0.0143295
4.49073	1.19544	0.14409	1.35776	0.0611513	1.11352	0.0161407
4.50925	1.17906	0.14484	1.35449	0.0665935	1.11323	0.0136124
4.52769	1.24037	0.2257	1.35373	0.0682291	1.11203	0.0122852
4.56435	1.18466	0.174965	1.3435	0.0628322	1.10209	0.0117948
4.58258	1.1937	0.157067	1.3245	0.0807011	1.10142	0.0143861
4.6188	1.17842	0.397041	1.22795	0.0924792	1.0764	0.0225306
4.63681	1.13436	0.117929	1.27039	0.0616408	1.08044	0.0128412
4.65475	1.19649	0.251868	1.26946	0.0822566	1.08318	0.0133779
4.67262	1.13336	0.165689	1.25193	0.0701243	1.07656	0.0131751
4.69042	1.09839	0.136537	1.21838	0.067171	1.06684	0.0129806
4.70815	1.02568	0.212618	1.21759	0.0594436	1.05868	0.011924
4.72582	1.10319	0.123839	1.21779	0.0637418	1.06251	0.0122981
4.76095	1.07336	0.172541	1.18548	0.0580625	1.04755	0.012075
4.77842	1.0705	0.169507	1.18725	0.0745298	1.0515	0.0127458
4.79583	1.05216	0.152719	1.18499	0.052443	1.04592	0.0101399
4.81318	1.02802	0.102297	1.1559	0.0655625	1.04234	0.0108251
4.83046	1.03027	0.100863	1.14213	0.0713982	1.0377	0.0139956
4.84768	1.04223	0.150528	1.16533	0.0622836	1.04129	0.01074
4.86484	0.926123	0.225654	1.11866	0.0487661	1.0222	0.0109589
4.89898	0.962427	0.215436	1.08136	0.0543057	1.01839	0.00864691
4.91596	1.02836	0.0990347	1.08374	0.0754824	1.02417	0.0127142
4.93288	1.01433	0.12687	1.08799	0.06805	1.02076	0.0106272
4.94975	1.03955	0.163127	1.1043	0.0631558	1.02047	0.0126752
4.96655	1.09107	0.271392	1.11449	0.101516	1.03758	0.0163859
4.98331	0.978848	0.122432	1.04444	0.0601446	1.00845	0.00952047
5	0.972575	0.142864	1.052	0.0615646	1.00587	0.0116599
5.03322	0.937741	0.125063	1.04775	0.0474289	1.00441	0.00850272
5.04975	0.924643	0.118557	1.02207	0.0504442	0.994743	0.0089834
5.06623	0.95026	0.132898	1.03196	0.0870407	1.0003	0.00893591
5.08265	0.893038	0.104501	1.01288	0.0475701	0.986271	0.00836685
5.11534	1.00312	0.209216	1.04647	0.0665624	1.00234	0.0118937
5.1316	0.901034	0.112784	0.97746	0.0679893	0.98031	0.0104865
5.16398	0.956164	0.24195	1.03357	0.0892089	0.997512	0.0161348
5.18009	0.881246	0.103781	0.966971	0.0546391	0.973396	0.00774076
5.19615	0.875034	0.096996	0.958049	0.0512847	0.972819	0.00858661
5.21217	0.886323	0.346421	0.899426	0.1513	0.960803	0.0187724
5.22813	0.901723	0.101065	0.950648	0.0576706	0.969808	0.00888268
5.24404	0.829601	0.160409	0.901454	0.08084	0.955114	0.0111068
5.25991	0.823434	0.132302	0.906189	0.0592506	0.951513	0.00930372
5.2915	0.809945	0.200083	0.869206	0.101103	0.946929	0.0120961
5.30723	0.916746	0.207768	0.948676	0.0515959	0.97279	0.0121748
5.32291	0.886835	0.116272	0.90331	0.059672	0.955928	0.00777265
5.33854	0.852689	0.109238	0.888023	0.0691891	0.951878	0.00815033
5.35413	0.751751	0.263116	0.86666	0.0627019	0.931089	0.00882183
5.36967	0.821926	0.068189	0.884085	0.056092	0.948747	0.00743772
5.38516	0.824422	0.12234	0.879772	0.0515681	0.947765	0.00696189
5.41603	0.82159	0.221384	0.892207	0.0708235	0.951244	0.00819707
5.43139	0.827991	0.223684	0.86326	0.0606008	0.943623	0.00687029
5.44671	0.821427	0.11304	0.870028	0.0551985	0.942936	0.00714934
5.46199	0.802688	0.121575	0.857403	0.0502851	0.937715	0.00613264
5.47723	0.797136	0.129909	0.822098	0.0661787	0.922859	0.0074472
5.49242	0.799796	0.19534	0.813789	0.0687389	0.920264	0.00902544
5.50757	0.777161	0.10863	0.839461	0.0610074	0.92967	0.00840136
5.53775	0.834307	0.160488	0.824932	0.0579216	0.926871	0.00927645
5.55278	0.767866	0.113678	0.798547	0.0669383	0.915901	0.0070953
5.56776	0.786407	0.105692	0.812887	0.0629539	0.921757	0.00843477
5.58271	0.776956	0.0770168	0.811744	0.0560302	0.920889	0.00635125
5.61249	0.759235	0.0902742	0.792648	0.0534949	0.91257	0.00599675
5.62731	0.722566	0.190793	0.742779	0.103429	0.895236	0.0101214
5.65685	0.763073	0.402866	0.712805	0.104332	0.886515	0.0247789
5.67157	0.749512	0.133173	0.771491	0.0781458	0.898156	0.00517343
5.68624	0.757586	0.12908	0.762497	0.0659478	0.903528	0.00527137
5.70088	0.762797	0.0894153	0.772808	0.062588	0.9059	0.0056524
5.71548	0.734666	0.134207	0.761	0.0581276	0.904267	0.0068234
5.73004	0.74768	0.087983	0.74983	0.0695705	0.900461	0.00659338
5.74456	0.762536	0.1348	0.762826	0.058926	0.905687	0.00673255
5.7735	0.724796	0.220689	0.730852	0.059002	0.892915	0.0073484
5.78792	0.746773	0.0745072	0.757354	0.0563911	0.904002	0.00841913
5.8023	0.749656	0.144015	0.708929	0.0749531	0.884188	0.00974642
5.81664	0.745918	0.17186	0.724711	0.0694292	0.891592	0.0105749
5.83095	0.753445	0.109643	0.752372	0.0765531	0.901412	0.0106049
5.84523	0.760102	0.1336	0.74154	0.0783168	0.89681	0.00678017
5.85947	0.730089	0.110076	0.71422	0.0663148	0.884866	0.00454807
5.88784	0.779408	0.189897	0.69238	0.0979057	0.877491	0.0142283
5.90198	0.736601	0.103542	0.707635	0.0638349	0.883993	0.00632667
5.91608	0.704201	0.106525	0.691476	0.0732237	0.875535	0.00606907
5.93015	0.66912	0.202022	0.638606	0.0796855	0.857636	0.00982395
5.94418	0.736209	0.15396	0.699959	0.0720612	0.882184	0.00898425
5.95819	0.713157	0.194392	0.69816	0.0899356	0.880814	0.00657303
5.97216	0.750005	0.177112	0.725646	0.0759216	0.892097	0.00944721
6	0.68411	0.0905535	0.704801	0.077676	0.881106	0.00580054
6.01387	0.661537	0.213107	0.626822	0.0751083	0.851148	0.00928698
6.02771	0.68158	0.130189	0.648966	0.0717452	0.856484	0.00561883
6.04152	0.725592	0.140831	0.655963	0.0794151	0.864787	0.00647145
6.06905	0.720833	0.128093	0.670049	0.0756604	0.870221	0.00534978
6.08276	0.745547	0.14497	0.659583	0.0727538	0.868942	0.0103765
6.1101	0.673457	0.133239	0.615656	0.0701272	0.84763	0.00726512
6.12372	0.712586	0.130558	0.638744	0.0748989	0.861043	0.00764989
6.13732	0.694885	0.166917	0.638945	0.0662515	0.864198	0.00940751
6.15088	0.693054	0.10987	0.65254	0.0650667	0.862686	0.00689813
6.16441	0.6916	0.196235	0.632784	0.119481	0.856721	0.00757718
6.17792	0.682985	0.128106	0.632597	0.0535428	0.855425	0.00606874
6.19139	0.69285	0.106328	0.642456	0.0763896	0.862115	0.00569135
6.21825	0.771255	0.223439	0.662765	0.124432	0.873313	0.0150111
6.23164	0.727037	0.117971	0.647408	0.076896	0.861981	0.00868267
6.245	0.686721	0.136786	0.605336	0.0694772	0.845248	0.0063544
6.25833	0.77635	0.189587	0.756557	0.11985	0.905538	0.0203192
6.27163	0.733853	0.161488	0.612901	0.0950554	0.852546	0.00667753
6.2849	0.673486	0.147838	0.603748	0.0827347	0.844327	0.00684769
6.29815	0.692762	0.168093	0.651564	0.0842677	0.860125	0.0088303
6.33772	0.706519	0.128136	0.613621	0.0816006	0.849032	0.00628831
6.35085	0.698654	0.129831	0.612543	0.0716187	0.851456	0.0068619
6.36396	0.702445	0.11034	0.593163	0.0688728	0.84134	0.00614629
6.37704	0.679448	0.160908	0.547642	0.0573194	0.820077	0.00895399
6.3901	0.676642	0.183452	0.581084	0.0783728	0.841101	0.00509593
6.40312	0.689316	0.149224	0.567218	0.0861947	0.831998	0.00683454
6.4291	0.678729	0.172373	0.556985	0.0752494	0.833087	0.00885111
6.44205	0.679494	0.153847	0.544372	0.0789875	0.825353	0.00707381
6.45497	0.700569	0.140659	0.610718	0.0901563	0.848016	0.00780502
6.46787	0.658398	0.137402	0.561655	0.0710944	0.831409	0.00709314
6.49359	0.595674	0.249035	0.508503	0.0894029	0.811883	0.00851025
6.50641	0.695427	0.163946	0.572644	0.0751501	0.836487	0.00848604
6.53197	0.735756	0.485775	0.799794	0.130765	0.924525	0.0411317
6.54472	0.673136	0.137587	0.55358	0.08333	0.826473	0.00870973
6.55744	0.657267	0.167968	0.557967	0.0716061	0.824464	0.00751816
6.57013	0.698837	0.194792	0.568336	0.0946286	0.838874	0.00903339
6.58281	0.634667	0.152471	0.558703	0.0812888	0.826196	0.00807872
6.59545	0.69403	0.132542	0.569444	0.078839	0.834676	0.00845773
6.60808	0.693776	0.177219	0.552978	0.11499	0.834252	0.0072262
6.63325	0.677518	0.115211	0.536963	0.0783076	0.82511	0.00757588
6.6458	0.741958	0.196466	0.593118	0.0875795	0.844337	0.0111637
6.65833	0.672647	0.127689	0.53198	0.0710203	0.821725	0.00631385
6.67083	0.618625	0.212264	0.495333	0.0722267	0.796979	0.0114779
6.68331	0.698246	0.269754	0.515259	0.117111	0.817353	0.00883253
6.69577	0.665579	0.147826	0.516305	0.0656456	0.811335	0.00740433
6.7082	0.681557	0.164768	0.510828	0.0727098	0.812515	0.00762288
6.733	0.666927	0.157249	0.545459	0.0898659	0.820876	0.0108646
6.74537	0.660642	0.14713	0.547713	0.0564675	0.829018	0.00998418
6.75771	0.638918	0.169472	0.498319	0.0693667	0.806615	0.00850757
6.77003	0.706233	0.202927	0.530772	0.0967568	0.819675	0.00754452
6.78233	0.688857	0.145004	0.550534	0.0892812	0.832958	0.00856528
6.79461	0.743086	0.194576	0.518422	0.114985	0.827509	0.0106769
6.80686	0.658975	0.199423	0.497759	0.0648682	0.807649	0.00991985
6.8313	0.639772	0.190133	0.468522	0.0872633	0.781421	0.0151914
6.84349	0.646881	0.144139	0.498379	0.0737314	0.807478	0.0075224
6.85565	0.670178	0.170985	0.522328	0.090627	0.81419	0.0096947
6.8678	0.675144	0.182374	0.49149	0.100562	0.808286	0.00766165
6.89202	0.630639	0.156124	0.477345	0.0807076	0.796792	0.00878921
6.90411	0.694613	0.181256	0.474078	0.0826645	0.801179	0.0073068
6.9282	0.678721	0.168583	0.527038	0.076996	0.822875	0.00963761
6.94022	0.630046	0.205303	0.451249	0.0632695	0.787198	0.0120047
6.95222	0.690813	0.180123	0.494486	0.0791401	0.807674	0.00848923
6.96419	0.605162	0.195903	0.443363	0.0739167	0.779903	0.011874
6.97615	0.654745	0.186393	0.472133	0.0975149	0.803889	0.0109046
6.98809	0.672813	0.203669	0.479596	0.0699483	0.799758	0.00814751
7	0.619605	0.221193	0.449022	0.0732125	0.781529	0.0107176
7.02377	0.669955	0.215028	0.485249	0.0697315	0.802461	0.00948739
7.03562	0.670838	0.168112	0.462554	0.0655984	0.798584	0.0100491
7.04746	0.744471	0.253978	0.483117	0.0858717	0.80643	0.0117474
7.05927	0.663182	0.212183	0.433019	0.0749879	0.784788	0.0109923
7.07107	0.618572	0.168513	0.43432	0.061357	0.784195	0.0120448
7.08284	0.682294	0.16809	0.463508	0.0758567	0.789656	0.00947468
7.0946	0.570079	0.199662	0.419746	0.10609	0.769628	0.0174317
7.11805	0.613994	0.236905	0.422028	0.0926228	0.767718	0.00917675
7.12975	0.672514	0.18318	0.442642	0.0636373	0.78601	0.0091935
7.14143	0.632961	0.157161	0.4453	0.0720466	0.785815	0.00916587
7.15309	0.664268	0.288896	0.460948	0.0799977	0.800942	0.0170917
7.16473	0.691682	0.162184	0.426156	0.0929968	0.783265	0.0142074
7.17635	0.674397	0.249849	0.465729	0.0807674	0.791865	0.0109265
7.18795	0.709986	0.229277	0.442114	0.0806914	0.79484	0.0101743
7.2111	0.638644	0.249565	0.431312	0.0740161	0.773743	0.0109479
7.22265	0.620876	0.208932	0.420334	0.0851749	0.766702	0.0127382
7.23418	0.653068	0.17894	0.418077	0.0704385	0.773798	0.0126322
7.24569	0.661602	0.201869	0.430299	0.06541	0.774723	0.00829411
7.26865	0.648449	0.189565	0.424309	0.0888166	0.781235	0.0126569
7.28011	0.592279	0.183658	0.409792	0.0761916	0.766326	0.0146634
7.30297	0.667637	0.34058	0.504714	0.10041	0.814044	0.0157566
7.31437	0.649041	0.167826	0.430067	0.0703436	0.777525	0.0102892
7.32575	0.646161	0.239501	0.403858	0.0803822	0.770543	0.010031
7.33712	0.590126	0.260271	0.394654	0.112108	0.764097	0.0200642
7.34847	0.653293	0.204612	0.427392	0.0757165	0.774153	0.0112437
7.3598	0.635952	0.214868	0.397242	0.09119	0.766593	0.0156472
7.37111	0.626172	0.200669	0.399819	0.0710955	0.765567	0.0127897
7.39369	0.774833	0.304188	0.433191	0.148149	0.805519	0.0105283
7.40495	0.644277	0.145457	0.397554	0.0677502	0.765557	0.0102382
7.4162	0.782008	0.237112	0.428804	0.128987	0.80146	0.00983289
7.42743	0.661637	0.236914	0.395165	0.0782118	0.763822	0.0163829
7.43864	0.63459	0.214627	0.405106	0.0997715	0.754799	0.0185005
7.44983	0.618469	0.184814	0.378593	0.0837805	0.753045	0.0180052
7.46101	0.670566	0.219976	0.408945	0.0639168	0.772423	0.011432
7.48331	0.773595	0.220034	0.428157	0.0907593	0.794253	0.0115482
7.49444	0.62276	0.146954	0.385158	0.0978821	0.760645	0.0115872
7.50555	0.654292	0.208334	0.405542	0.0877378	0.764323	0.0114756
7.51665	0.598156	0.17699	0.376405	0.102034	0.747463	0.0169601
7.52773	0.572413	0.308308	0.407227	0.128437	0.760591	0.0193252
7.53879	0.658656	0.225379	0.400246	0.0740211	0.767177	0.0133004
7.54983	0.628062	0.177477	0.387321	0.0942026	0.750998	0.0153709
7.57188	0.608697	0.17278	0.373694	0.09456	0.748238	0.0151186
7.58288	0.643145	0.209358	0.384073	0.0978186	0.759959	0.0178823
7.59386	0.624245	0.11164	0.384193	0.083041	0.755652	0.0150409
7.60482	0.638615	0.192467	0.385728	0.111757	0.760761	0.0161047
7.62671	0.61282	0.179131	0.359364	0.0904966	0.744137	0.012611
7.63763	0.660102	0.148288	0.375853	0.0785131	0.75227	0.0168083
7.65942	0.58477	0.169668	0.336492	0.149467	0.733283	0.0232822
7.67029	0.669914	0.180736	0.385195	0.0895299	0.755355	0.0164364
7.68115	0.625071	0.158704	0.348658	0.100516	0.742817	0.0188079
7.69199	0.628523	0.221884	0.379834	0.089022	0.755881	0.0150005
7.70281	0.658596	0.174982	0.377251	0.0893093	0.758036	0.0107974
7.71362	0.669655	0.289028	0.417711	0.0831954	0.782241	0.0184133
7.72442	0.649818	0.24513	0.338735	0.0868481	0.742788	0.0306162
7.74597	0.627538	0.183318	0.362465	0.0808873	0.752522	0.0203749
7.75672	0.668652	0.220002	0.379984	0.112177	0.747857	0.018763
7.76745	0.638612	0.136588	0.361028	0.0965476	0.746331	0.0162279
7.77817	0.646375	0.26569	0.354506	0.111826	0.729989	0.0168425
7.79957	0.605218	0.13455	0.370383	0.0986177	0.739284	0.0167601
7.81025	0.615891	0.202891	0.372827	0.115829	0.742318	0.0170553
7.84219	0.625375	0.180035	0.364454	0.10486	0.742885	0.0168772
7.85281	0.639776	0.251752	0.371712	0.106123	0.751066	0.0192003
7.86342	0.630456	0.116155	0.345069	0.109465	0.73424	0.0224765
7.87401	0.67575	0.248881	0.384886	0.0783562	0.761363	0.0122373
7.88458	0.659361	0.189216	0.370886	0.106795	0.75299	0.0137129
7.89515	0.626208	0.183685	0.345881	0.103628	0.736932	0.0161232
7.91623	0.622533	0.184293	0.343972	0.117699	0.731447	0.0198844
7.92675	0.626155	0.129111	0.328698	0.121837	0.731859	0.0259561
7.93725	0.629187	0.194673	0.374084	0.119866	0.750865	0.0148628
7.96869	0.660286	0.122987	0.344691	0.0962971	0.738735	0.0162999
7.97914	0.648681	0.162332	0.356383	0.126174	0.736182	0.020361
8	0.705557	0.356166	0.388364	0.120461	0.759458	0.023045
8.01041	0.61059	0.223552	0.355767	0.113673	0.737061	0.0158164
8.02081	0.609526	0.188284	0.369645	0.110483	0.739967	0.0188025
8.03119	0.652979	0.14038	0.318553	0.119914	0.730806	0.0287937
8.04156	0.56815	0.349347	0.327319	0.14895	0.712038	0.0284925
8.05191	0.621207	0.152167	0.325667	0.135152	0.730955	0.0276294
8.06226	0.638482	0.16736	0.317593	0.109217	0.719895	0.0226587
8.0829	0.665576	0.258698	0.369034	0.113764	0.744646	0.0170462
8.09321	0.629008	0.247904	0.375713	0.13425	0.743825	0.014883
8.1035	0.597279	0.0969178	0.338999	0.116686	0.727539	0.020037
8.11377	0.627707	0.189136	0.359119	0.121454	0.737113	0.0192789
8.12404	0.646546	0.228149	0.321451	0.109975	0.728331	0.0213758
8.14453	0.623694	0.158323	0.324068	0.112534	0.729648	0.0201548
8.16497	0.658368	0.297317	0.395854	0.149721	0.75228	0.0233268
8.17517	0.655458	0.136419	0.336196	0.109338	0.733933	0.0172163
8.18535	0.64134	0.094654	0.337265	0.138512	0.72738	0.0221941
8.19553	0.636921	0.252868	0.342064	0.150874	0.731216	0.0141083
8.20569	0.636059	0.072161	0.329388	0.117163	0.728148	0.0217171
8.21584	0.647014	0.179074	0.333144	0.129182	0.731295	0.0228716
8.22598	0.672891	0.261785	0.295396	0.107956	0.728804	0.0338024
8.24621	0.672052	0.282752	0.321309	0.131968	0.721867	0.0168536
8.25631	0.607652	0.193853	0.348773	0.11256	0.722988	0.0180934
8.2664	0.649437	0.155822	0.320094	0.114753	0.725215	0.0218571
8.27647	0.597221	0.389328	0.307673	0.153945	0.705167	0.0290676
8.29659	0.610077	0.200136	0.31425	0.129807	0.715006	0.0253653
8.30662	0.667439	0.150849	0.302649	0.159402	0.716285	0.0272141
8.32666	0.619298	0.200865	0.362954	0.130665	0.734688	0.0173431
8.33667	0.651716	0.156054	0.281644	0.108445	0.712611	0.0275536
8.34666	0.656732	0.124072	0.309926	0.14005	0.724423	0.0283623
8.35663	0.629183	0.1873	0.306983	0.118058	0.716237	0.0224597
8.3666	0.654784	0.314918	0.319975	0.117156	0.734323	0.0302553
8.37655	0.592683	0.147975	0.311103	0.124732	0.719793	0.0247218
8.3865	0.600975	0.415943	0.356559	0.176374	0.735297	0.0235308
8.41625	0.631733	0.222391	0.332877	0.128621	0.728602	0.0189903
8.42615	0.641415	0.19114	0.349999	0.124791	0.734871	0.0204354
8.43603	0.657273	0.200036	0.276258	0.126073	0.71763	0.0331308
8.44591	0.701505	0.261104	0.283051	0.137056	0.714004	0.0231364
8.45577	0.631762	0.0918308	0.31751	0.129778	0.718927	0.0226233
8.46562	0.659733	0.253434	0.317837	0.124805	0.719974	0.0176878
8.48528	0.649893	0.518925	0.321924	0.191692	0.69847	0.0239865
8.4951	0.673812	0.145758	0.283098	0.147659	0.714807	0.0310664
8.5049	0.626327	0.266269	0.312781	0.118145	0.70881	0.0204838
8.52447	0.634682	0.17505	0.316736	0.128749	0.723387	0.0233426
8.53424	0.681467	0.247773	0.306018	0.11907	0.720891	0.0215977
8.544	0.623685	0.352404	0.272012	0.126245	0.700193	0.0298861
8.56349	0.589381	0.265621	0.261359	0.119477	0.701667	0.0301841
8.57321	0.65096	0.146087	0.303184	0.130906	0.718893	0.0239993
8.59263	0.679693	0.189652	0.291329	0.168442	0.711806	0.0292957
8.62168	0.647936	0.142392	0.275463	0.118556	0.708408	0.0282109
8.65063	0.655948	0.124445	0.29423	0.158501	0.718137	0.0281748
8.66025	0.617474	0.112307	0.288143	0.121468	0.714699	0.0259272
8.66987	0.574943	0.511982	0.350021	0.198652	0.729917	0.0253035
8.67948	0.575118	0.450864	0.360588	0.191246	0.735444	0.0268154
8.68907	0.595919	0.382773	0.359233	0.189927	0.733142	0.0247328
8.69866	0.634324	0.483114	0.337316	0.186062	0.723304	0.0186832
8.7178	0.631505	0.131731	0.304149	0.131814	0.716612	0.0237555
8.72735	0.672438	0.277081	0.286084	0.139114	0.70391	0.0250494
8.73689	0.658818	0.14591	0.274469	0.156032	0.709307	0.0331224
8.74643	0.648032	0.285359	0.302244	0.120301	0.705508	0.018764
8.76546	0.630984	0.207098	0.285933	0.106882	0.706084	0.0230796
8.79394	0.671888	0.1513	0.275943	0.151938	0.713	0.0323162
8.80341	0.606422	0.279101	0.260138	0.139619	0.695516	0.0314018
8.81287	0.674822	0.459969	0.311278	0.158861	0.714194	0.0202535
8.82232	0.639061	0.319601	0.237616	0.116173	0.700109	0.0345213
8.83176	0.645757	0.397217	0.305845	0.150897	0.716462	0.0193684
8.84119	0.608356	0.248899	0.241643	0.121804	0.699866	0.0327414
8.85061	0.647308	0.185847	0.264869	0.166536	0.7062	0.0297033
8.87881	0.592154	0.181724	0.266781	0.162773	0.699798	0.0337206
8.88819	0.684099	0.200338	0.279751	0.163824	0.709988	0.0293126
8.89757	0.649853	0.202384	0.267347	0.127376	0.704007	0.0283283
8.91628	0.637414	0.172303	0.268193	0.107453	0.709865	0.0291156
8.95358	0.620937	0.181038	0.289674	0.13467	0.714408	0.0275925
8.96289	0.599501	0.279603	0.312829	0.147201	0.707112	0.0231341
8.98146	0.641322	0.478023	0.260094	0.155194	0.688228	0.0318211
8.99074	0.63797	0.127948	0.278995	0.138972	0.708167	0.0254382
9	0.645305	0.276579	0.259138	0.116478	0.695568	0.0299103
9.0185	0.656989	0.356464	0.28231	0.134961	0.708334	0.0277729
9.02774	0.677048	0.170029	0.260364	0.161993	0.704876	0.0333405
9.03696	0.641459	0.257094	0.261048	0.101704	0.70098	0.0251016
9.05539	0.575695	0.270778	0.257635	0.14165	0.692789	0.0347236
9.07377	0.612601	0.256763	0.234075	0.134494	0.693926	0.0337045
9.10128	0.687156	0.547198	0.304344	0.162935	0.713052	0.0213843
9.11043	0.634339	0.296453	0.223053	0.119249	0.699459	0.0368828
9.11958	0.629119	0.24215	0.2409	0.142768	0.704327	0.0303377
9.12871	0.60956	0.244974	0.235932	0.12698	0.698866	0.0343707
9.13783	0.645285	0.238557	0.267722	0.159292	0.704934	0.0300749
9.14695	0.611296	0.215275	0.241067	0.159408	0.697333	0.0356528
9.18332	0.662188	0.278052	0.262485	0.115073	0.704829	0.0279323
9.19239	0.610502	0.572813	0.251098	0.155326	0.682179	0.0331989
9.2105	0.644603	0.46091	0.251529	0.149102	0.683795	0.0337724
9.2376	0.529713	0.6694	0.366692	0.274621	0.730563	0.0262199
9.24662	0.609679	0.342065	0.252865	0.119831	0.691239	0.0325347
9.25563	0.611253	0.293319	0.223977	0.150712	0.699156	0.0345667
9.26463	0.63052	0.368519	0.234868	0.124626	0.688226	0.0347565
9.27362	0.645112	0.152038	0.261832	0.138308	0.704283	0.028146
9.2826	0.662669	0.394196	0.26908	0.122471	0.708124	0.031447
9.31844	0.621726	0.256408	0.232849	0.132179	0.693815	0.0330917
9.35414	0.651634	0.2516	0.214956	0.131972	0.69352	0.0351408
9.38083	0.732558	0.658358	0.306906	0.16963	0.712652	0.0224472
9.39858	0.622968	0.317061	0.239653	0.132494	0.703413	0.0312606
9.40744	0.609803	0.311525	0.222671	0.153585	0.694826	0.0371366
9.42514	0.613029	0.226973	0.227276	0.162717	0.695893	0.0362982
9.43398	0.638319	0.527924	0.255395	0.153121	0.679668	0.0361642
9.45163	0.636875	0.445765	0.24666	0.130377	0.679591	0.0356371
9.46044	0.705739	0.596552	0.292091	0.123754	0.711593	0.0288759
9.46925	0.651767	0.447193	0.238164	0.142855	0.684393	0.0358483
9.50438	0.608226	0.351133	0.238597	0.136623	0.684294	0.0351312
9.5219	0.63454	0.416461	0.206842	0.132308	0.688792	0.0365442
9.53065	0.615731	0.334322	0.208707	0.140677	0.698103	0.0342458
9.53939	0.655801	0.360479	0.225814	0.131828	0.688752	0.0353989
9.55685	0.663013	0.421103	0.266596	0.137153	0.708766	0.0327897
9.57427	0.606321	0.300886	0.217664	0.158205	0.690635	0.036557
9.59166	0.634724	0.287084	0.208995	0.155954	0.690933	0.0369308
9.66954	0.642625	0.466793	0.253894	0.125471	0.681575	0.0361026
9.67815	0.638808	0.356182	0.210567	0.151335	0.694015	0.037296
9.68676	0.698148	0.507189	0.245795	0.156552	0.681386	0.0369613
9.70395	0.653262	0.467448	0.255864	0.152037	0.678919	0.0359457
9.73824	0.655251	0.460634	0.226652	0.147707	0.686093	0.0367349
9.75534	0.586405	0.365099	0.234534	0.161724	0.683129	0.0347956
9.77241	0.644066	0.364399	0.237394	0.155979	0.684251	0.0352166
9.79796	0.622897	0.398159	0.186882	0.137178	0.696289	0.0341229
9.84039	0.618494	0.334978	0.207928	0.159507	0.690597	0.0363496
9.89949	0.662759	0.671495	0.272098	0.169605	0.674058	0.0409376
9.91632	0.693984	0.595741	0.263693	0.169955	0.676141	0.0383952
9.9415	0.672137	0.399782	0.197432	0.148679	0.694051	0.0375017
9.94987	0.685783	0.492605	0.256585	0.174466	0.678533	0.0366316
9.96661	0.684567	0.486014	0.259624	0.167648	0.679623	0.0357921
10.0167	0.60936	0.38724	0.237526	0.171546	0.683336	0.0351257
10.0995	0.616359	0.367135	0.19907	0.168678	0.690383	0.0360753
10.1407	0.702185	0.683161	0.277086	0.17183	0.672526	0.0423502
10.1571	0.69708	0.637904	0.275792	0.188206	0.671818	0.0395098
10.1735	0.714986	0.62896	0.261019	0.170631	0.677736	0.0386427
10.2062	0.680989	0.486076	0.281184	0.211128	0.674801	0.0363308
10.2713	0.589994	0.411752	0.229475	0.17794	0.682252	0.0356056
10.3763	0.746081	0.732197	0.278222	0.174453	0.669555	0.0459357
10.3923	0.727158	0.708669	0.275471	0.170679	0.673925	0.0435988
10.4083	0.71699	0.677177	0.283628	0.205966	0.670835	0.0403184
10.4563	0.674772	0.422521	0.287614	0.228129	0.673885	0.0374729
10.6066	0.834884	0.80865	0.261502	0.18762	0.669355	0.0514936
10.6223	0.811202	0.808372	0.27594	0.178616	0.669727	0.0479601
10.6536	0.74875	0.683232	0.291533	0.224277	0.669216	0.0422919
10.8474	0.907661	0.875549	0.24927	0.188625	0.670394	0.0550371
10.8628	0.849734	0.902693	0.272531	0.183207	0.669193	0.0498372
11.083	0.9507	0.964429	0.225926	0.191254	0.671268	0.0591403
11.3137	0.99455	1.02923	0.194148	0.215223	0.67185	0.065664
Fig. 8c	pyCaprin1 self-correlation at [ATP-Mg] = 0.0001, 0.03 and 0.5 b^{-3}
r/b	0.0001(Avg)	0.0001(Std)	0.03(Avg)	0.03(Std)	0.5(Avg)	0.5(Std)
0	56.5337	1.20779	37.8512	1.00991	18.4155	0.46763
0.408248	50.4237	1.18823	33.3156	0.954391	14.8895	0.398717
0.57735	45.9533	1.04036	29.9362	0.920828	12.4134	0.314334
0.707107	42.509	0.956899	27.4628	0.95601	10.6292	0.237331
0.816497	39.5771	0.93114	25.4972	0.906892	9.38582	0.236115
0.912871	37.1915	0.814373	23.9575	0.826827	8.45319	0.169612
1	35.1192	0.744661	22.6524	0.800767	7.72939	0.157006
1.1547	31.5267	0.665357	20.5273	0.779322	6.71385	0.171241
1.22474	30.0163	0.610407	19.5886	0.697815	6.28164	0.175075
1.29099	28.5773	0.584141	18.7968	0.643207	5.97638	0.144339
1.35401	27.2391	0.56064	18.0083	0.625823	5.69121	0.15323
1.41421	25.991	0.464646	17.3161	0.655432	5.38532	0.172543
1.47196	24.7905	0.443844	16.6384	0.612729	5.21541	0.137761
1.52753	23.7067	0.429028	15.9935	0.583903	4.97372	0.135712
1.63299	21.6259	0.394904	15.0093	0.487514	4.55972	0.125612
1.68325	20.7634	0.378908	14.3408	0.509947	4.45538	0.108649
1.73205	19.8582	0.340544	13.8107	0.48097	4.29071	0.129724
1.77951	19.0303	0.321289	13.3505	0.482009	4.14091	0.0789668
1.82574	18.2156	0.304666	12.9021	0.452362	4.04604	0.123341
1.87083	17.4816	0.282847	12.4533	0.41841	3.92966	0.129732
1.91485	16.7937	0.294229	11.992	0.424521	3.81206	0.112142
2	15.4385	0.246838	11.2496	0.398661	3.60956	0.104735
2.04124	14.7607	0.237965	10.9283	0.368479	3.50036	0.101791
2.08167	14.2086	0.227379	10.5751	0.350508	3.42175	0.0883673
2.12132	13.6431	0.22354	10.2919	0.355082	3.36913	0.0871796
2.19848	12.6262	0.206384	9.59529	0.322211	3.1751	0.0825634
2.23607	12.1177	0.200146	9.318	0.290624	3.11528	0.0917081
2.3094	11.1841	0.0892665	8.74916	0.295622	2.94566	0.0923352
2.34521	10.7922	0.126633	8.47942	0.258118	2.92103	0.0675407
2.38048	10.3672	0.141008	8.23902	0.293662	2.83154	0.0648236
2.41523	9.94127	0.101318	8.02337	0.255284	2.78365	0.0778405
2.44949	9.61041	0.167981	7.81608	0.288527	2.76659	0.0739625
2.48328	9.21934	0.171728	7.64717	0.215194	2.73768	0.111373
2.51661	8.89108	0.121913	7.37139	0.210326	2.6564	0.0895616
2.58199	8.25475	0.106381	7.03444	0.244042	2.57193	0.0863012
2.61406	7.94164	0.0783219	6.74073	0.20207	2.52521	0.0636814
2.64575	7.65033	0.0885458	6.53849	0.202837	2.46181	0.0836976
2.67706	7.40123	0.111698	6.38092	0.192885	2.41943	0.0549209
2.70801	7.13884	0.13669	6.17039	0.198317	2.37275	0.0624841
2.73861	6.86741	0.0703395	6.05536	0.210443	2.36494	0.0785443
2.76887	6.65699	0.0628369	5.89794	0.179951	2.29903	0.0587572
2.82843	6.13174	0.205656	5.52074	0.253472	2.2678	0.12982
2.85774	5.96598	0.0873869	5.41652	0.154009	2.20827	0.0659175
2.88675	5.74096	0.0926941	5.29641	0.174311	2.21408	0.0605381
2.91548	5.54435	0.105337	5.1559	0.154479	2.17949	0.049005
2.94392	5.37512	0.136607	5.00068	0.20591	2.11095	0.0968876
2.97209	5.19442	0.0979084	4.89123	0.161484	2.10018	0.070581
3	4.99169	0.0865162	4.75757	0.160236	2.07816	0.0652893
3.05505	4.66166	0.103062	4.51501	0.137746	2.02999	0.061405
3.08221	4.4819	0.10415	4.37746	0.156996	1.97444	0.0648717
3.10913	4.38484	0.0950682	4.33078	0.194053	1.95409	0.0704214
3.13581	4.20292	0.096405	4.19025	0.176079	1.96402	0.0524967
3.18852	3.92792	0.113325	3.94404	0.161728	1.88921	0.0589313
3.21455	3.79446	0.110159	3.8403	0.139643	1.86144	0.0726938
3.26599	3.66553	0.199062	3.83768	0.212448	1.8567	0.0512039
3.2914	3.46359	0.106196	3.65282	0.122645	1.80581	0.0555919
3.31662	3.34534	0.0848325	3.53806	0.124992	1.79771	0.0520247
3.34166	3.20736	0.150532	3.36291	0.140901	1.78768	0.0784562
3.3665	3.12472	0.155035	3.35706	0.161796	1.75627	0.0641259
3.39116	3.03505	0.0981506	3.28467	0.143348	1.74007	0.0457997
3.41565	2.90716	0.172437	3.22427	0.187936	1.74268	0.0467786
3.4641	2.74114	0.0734343	3.05726	0.150513	1.69459	0.0507113
3.48807	2.67844	0.0750787	2.96956	0.112866	1.65885	0.035446
3.51188	2.59868	0.105583	2.89417	0.119602	1.65542	0.0510556
3.53553	2.5284	0.100534	2.83494	0.102768	1.64309	0.0646016
3.55903	2.40983	0.106061	2.79008	0.0754055	1.64397	0.0492366
3.58236	2.32107	0.10481	2.71502	0.13363	1.60234	0.0414146
3.60555	2.25825	0.0878627	2.67815	0.0866995	1.59346	0.0491702
3.65148	2.18614	0.116742	2.53522	0.128751	1.53575	0.0549309
3.67423	2.08286	0.118238	2.46738	0.115969	1.56028	0.0410724
3.69685	2.00478	0.138946	2.46958	0.174439	1.51818	0.0659268
3.71932	1.91158	0.120726	2.39826	0.0955017	1.51734	0.0492603
3.74166	1.92962	0.129546	2.2854	0.146619	1.5121	0.043551
3.76386	1.85175	0.128603	2.30152	0.136783	1.50054	0.061051
3.78594	1.77355	0.0888706	2.25172	0.104392	1.49648	0.0482604
3.82971	1.66	0.148192	2.1298	0.152114	1.496	0.109205
3.85141	1.60508	0.0645515	2.08965	0.0952191	1.46024	0.047672
3.87298	1.57983	0.118665	2.02991	0.0848484	1.44375	0.0530352
3.89444	1.52056	0.082772	2.00823	0.147301	1.4213	0.0414869
3.937	1.44276	0.121604	1.90014	0.0856867	1.41057	0.0730645
3.95811	1.36499	0.0543132	1.86536	0.10204	1.40444	0.0373834
4	1.29609	0.0856342	1.78493	0.080452	1.39065	0.0688926
4.02078	1.27934	0.0980078	1.75095	0.0686777	1.37657	0.0621791
4.04145	1.25997	0.107143	1.7081	0.0713796	1.35208	0.0429118
4.06202	1.17741	0.0627203	1.68476	0.061903	1.34854	0.0322045
4.08248	1.20674	0.121496	1.67004	0.105514	1.34786	0.07059
4.10284	1.13212	0.0670547	1.61593	0.0585005	1.32722	0.0423967
4.12311	1.08421	0.120274	1.65003	0.129267	1.30445	0.0780453
4.16333	1.0331	0.063118	1.55703	0.0841218	1.30362	0.0587795
4.1833	1.00831	0.140771	1.5151	0.0688343	1.29275	0.0338487
4.20317	0.988387	0.0752278	1.4495	0.0793287	1.27932	0.0470896
4.22295	0.957125	0.070655	1.4303	0.0717695	1.2929	0.0661785
4.24264	0.934847	0.099599	1.45811	0.110311	1.25752	0.0460885
4.26224	0.910611	0.0622892	1.37584	0.0743928	1.25602	0.0491865
4.28174	0.89688	0.0721343	1.35535	0.0522375	1.2451	0.0262612
4.33974	0.807596	0.0571734	1.26821	0.055153	1.22604	0.0389477
4.3589	0.757787	0.0652515	1.25604	0.0841747	1.23463	0.0396686
4.37798	0.770183	0.0862	1.22302	0.066591	1.1925	0.0253448
4.39697	0.76312	0.079835	1.18332	0.0589407	1.20514	0.0548542
4.41588	0.744978	0.0636824	1.19624	0.0621821	1.1997	0.0429172
4.43471	0.736853	0.0807386	1.14843	0.0381855	1.20237	0.0431727
4.47214	0.690064	0.0805979	1.10299	0.0788074	1.18124	0.0453362
4.49073	0.66038	0.042324	1.09583	0.058648	1.17479	0.0415955
4.50925	0.618762	0.0841756	1.08176	0.0521138	1.1565	0.0322444
4.52769	0.635983	0.174764	1.0894	0.0995496	1.12672	0.0459717
4.56435	0.595896	0.0944471	1.04449	0.0392801	1.14582	0.0425259
4.58258	0.570099	0.0584391	1.03234	0.0579518	1.1393	0.0507738
4.6188	0.596848	0.0975858	1.01524	0.144612	1.1316	0.0746577
4.63681	0.533052	0.0470262	0.943692	0.0433577	1.12389	0.0421705
4.65475	0.501323	0.0494038	0.959958	0.0939701	1.10324	0.0453669
4.67262	0.504173	0.0366677	0.933344	0.0493776	1.10839	0.0445393
4.69042	0.496342	0.062173	0.870779	0.0628098	1.10671	0.0447288
4.70815	0.436839	0.0934543	0.891868	0.0785279	1.1005	0.0296052
4.72582	0.483235	0.043821	0.87116	0.0371383	1.09566	0.0414553
4.76095	0.44673	0.0442627	0.881232	0.0808816	1.10601	0.0404108
4.77842	0.439684	0.0486297	0.81984	0.0617594	1.09018	0.0393155
4.79583	0.420315	0.0538016	0.829508	0.0562344	1.06077	0.0405717
4.81318	0.433367	0.0578238	0.774084	0.0524599	1.08154	0.0477944
4.83046	0.428289	0.0812053	0.805547	0.0482984	1.0667	0.0440325
4.84768	0.415969	0.0768083	0.773396	0.0689439	1.05559	0.048714
4.86484	0.372396	0.0959531	0.758986	0.116226	1.03697	0.0374118
4.89898	0.327495	0.110576	0.676786	0.0877789	1.03978	0.0722269
4.91596	0.342309	0.0537421	0.730742	0.0472817	1.02461	0.0401017
4.93288	0.363957	0.0466938	0.709236	0.0410306	1.02998	0.0385334
4.94975	0.376856	0.0314119	0.768736	0.0435301	1.03327	0.0551469
4.96655	0.301963	0.192006	0.728916	0.133266	1.01403	0.0863006
4.98331	0.323797	0.0598825	0.702494	0.0565683	1.02041	0.0342855
5	0.317146	0.0696743	0.680311	0.0187551	1.0377	0.038614
5.03322	0.288439	0.0709121	0.642997	0.0600345	1.01161	0.0353119
5.04975	0.299549	0.0442742	0.652575	0.0581822	1.01832	0.0309793
5.06623	0.253451	0.0881569	0.638921	0.0640993	1.01538	0.0290562
5.08265	0.300655	0.0557334	0.607999	0.070792	0.999078	0.0153367
5.11534	0.251216	0.0711203	0.650429	0.0581214	0.982092	0.0645261
5.1316	0.271043	0.0765546	0.604424	0.0240412	0.992162	0.0395021
5.16398	0.260139	0.0882281	0.626314	0.0936992	1.01206	0.0689399
5.18009	0.258332	0.0552655	0.565392	0.0320977	0.987345	0.0184378
5.19615	0.280333	0.0721411	0.551616	0.0730083	0.980557	0.0168896
5.21217	0.214301	0.146233	0.546845	0.102658	0.945471	0.0851564
5.22813	0.231437	0.0657666	0.559476	0.0515844	0.955829	0.0425027
5.24404	0.208884	0.0643163	0.505978	0.0838326	0.976896	0.0275244
5.25991	0.234281	0.0420607	0.505634	0.0545462	0.962658	0.0334574
5.2915	0.166115	0.106467	0.480263	0.0772821	0.987345	0.059404
5.30723	0.249092	0.0843689	0.531324	0.0519102	0.966603	0.0387245
5.32291	0.195223	0.0480185	0.513173	0.0634413	0.942777	0.0277358
5.33854	0.181861	0.060396	0.491527	0.0392098	0.951705	0.0283687
5.35413	0.251406	0.104215	0.494095	0.0838026	0.909251	0.0518585
5.36967	0.174294	0.0421616	0.474018	0.0403416	0.939762	0.0228902
5.38516	0.168897	0.0544777	0.468027	0.0340645	0.928845	0.0448852
5.41603	0.217265	0.16922	0.474021	0.0700617	0.993643	0.0464406
5.43139	0.186105	0.0939752	0.470107	0.0564665	0.907727	0.0447193
5.44671	0.160291	0.0805458	0.458601	0.0477198	0.9475	0.0258493
5.46199	0.157196	0.0537459	0.458986	0.0469852	0.911525	0.0234873
5.47723	0.167242	0.0546532	0.418733	0.0714656	0.928009	0.0324318
5.49242	0.166329	0.0647376	0.424689	0.077434	0.915437	0.0339188
5.50757	0.147464	0.0685497	0.439788	0.0273306	0.90833	0.0264499
5.53775	0.151972	0.0856588	0.424712	0.0506355	0.933705	0.0247294
5.55278	0.143942	0.0577434	0.399879	0.058251	0.904676	0.0274788
5.56776	0.140679	0.0642815	0.411589	0.0512643	0.903705	0.0224638
5.58271	0.130826	0.0444634	0.374953	0.0848043	0.901982	0.0177726
5.61249	0.147481	0.0475602	0.396116	0.0462615	0.896912	0.018701
5.62731	0.086136	0.0485171	0.355216	0.11025	0.874188	0.0428632
5.65685	0.159755	0.160561	0.363373	0.242384	0.866959	0.0593037
5.67157	0.148464	0.0615292	0.397585	0.0979959	0.876236	0.0277662
5.68624	0.130944	0.0552122	0.383325	0.0781914	0.881507	0.0343531
5.70088	0.126955	0.0674357	0.371577	0.0912686	0.871174	0.0408524
5.71548	0.165982	0.0728218	0.360733	0.0820331	0.892947	0.0428796
5.73004	0.0785561	0.0658647	0.357739	0.0625037	0.890832	0.0244632
5.74456	0.10947	0.081011	0.361299	0.0858328	0.878921	0.0301175
5.7735	0.052299	0.0907966	0.338304	0.0558915	0.855832	0.0206153
5.78792	0.0758889	0.0747027	0.351793	0.0519923	0.882964	0.0256857
5.8023	0.101639	0.0663156	0.344803	0.0725604	0.875245	0.024502
5.81664	0.0990556	0.0697639	0.335296	0.0411963	0.885604	0.0283993
5.83095	0.0499078	0.072276	0.327377	0.0523008	0.892003	0.042494
5.84523	0.108751	0.0546363	0.35287	0.0910444	0.858579	0.0552596
5.85947	0.0745769	0.0531773	0.316842	0.0628541	0.84849	0.0187658
5.88784	0.0972086	0.122442	0.303421	0.101087	0.839582	0.0578357
5.90198	0.106173	0.0632735	0.310586	0.069817	0.868624	0.028079
5.91608	0.0919084	0.102026	0.305838	0.129976	0.867874	0.0424186
5.93015	0.0651189	0.0883887	0.251277	0.117084	0.830396	0.0306942
5.94418	0.125001	0.0745862	0.313718	0.072318	0.833486	0.0450644
5.95819	0.0939045	0.055797	0.310785	0.0816282	0.82548	0.0233649
5.97216	0.12078	0.0569151	0.32691	0.0755062	0.894959	0.0466797
6	0.0505161	0.0440569	0.298928	0.0917191	0.860813	0.0389358
6.01387	0.0447139	0.0726407	0.260483	0.0945245	0.823958	0.0274264
6.02771	0.0521598	0.0468322	0.261624	0.108772	0.823855	0.0376615
6.04152	0.0840682	0.0694585	0.266035	0.0880235	0.818542	0.0357611
6.06905	0.0815445	0.0591938	0.299391	0.0720544	0.841332	0.0172868
6.08276	0.0817276	0.0818435	0.315096	0.0706958	0.844603	0.0314901
6.1101	0.0410441	0.0929374	0.239877	0.113073	0.800334	0.0345047
6.12372	0.0444975	0.067924	0.263366	0.0670997	0.839138	0.0329218
6.13732	0.0638619	0.0648045	0.25758	0.0891071	0.829943	0.0442205
6.15088	0.0424105	0.0578621	0.256747	0.0771356	0.833324	0.0362774
6.16441	0.0365975	0.138003	0.25939	0.121237	0.817471	0.0460957
6.17792	0.0378783	0.0863388	0.236203	0.0596759	0.810044	0.0454069
6.19139	0.0505452	0.0450153	0.264689	0.0811359	0.830288	0.0301374
6.21825	0.0871113	0.132647	0.335898	0.165394	0.808337	0.0595579
6.23164	0.0912877	0.089805	0.259982	0.103363	0.826389	0.0311377
6.245	0.0504191	0.0353131	0.23217	0.0773486	0.806688	0.0184222
6.25833	0.037584	0.15258	0.326685	0.112704	0.870142	0.0700526
6.27163	0.0940994	0.0639879	0.274359	0.0974203	0.82872	0.0323209
6.2849	0.0580726	0.0464554	0.236835	0.100353	0.824685	0.025603
6.29815	0.0415428	0.0233871	0.226835	0.112563	0.822058	0.0325228
6.33772	0.0719087	0.0470196	0.25896	0.0949019	0.816689	0.0207578
6.35085	0.0815791	0.0433562	0.263307	0.079601	0.799898	0.0319643
6.36396	0.07038	0.0303663	0.237117	0.0800309	0.812609	0.0270981
6.37704	0.0306064	0.0456243	0.201365	0.112205	0.786657	0.0480588
6.3901	0.0669929	0.0737031	0.238326	0.090672	0.796549	0.0348023
6.40312	0.0274885	0.0502232	0.213174	0.100184	0.80211	0.042152
6.4291	0.0648372	0.0866081	0.22236	0.0761464	0.812586	0.0345434
6.44205	0.0481479	0.0444357	0.223964	0.110042	0.782265	0.0347141
6.45497	0.0733041	0.0508177	0.225521	0.0926262	0.79271	0.0274238
6.46787	0.0547597	0.0615611	0.209374	0.0865445	0.789963	0.0139086
6.49359	0.0300423	0.0924386	0.145982	0.108082	0.81359	0.0381533
6.50641	0.077473	0.0367153	0.236104	0.0765252	0.805639	0.0338539
6.53197	0.0716609	0.359288	0.341397	0.317505	0.746097	0.103717
6.54472	0.0310719	0.0599814	0.206216	0.110973	0.779001	0.024213
6.55744	0.0309515	0.045267	0.194639	0.13299	0.775319	0.0383568
6.57013	0.0779757	0.0783532	0.233939	0.0859958	0.819317	0.0374396
6.58281	0.0404921	0.0567326	0.173654	0.10938	0.771129	0.029713
6.59545	0.0566043	0.0503355	0.216842	0.0889477	0.788454	0.0295721
6.60808	0.0714692	0.140542	0.242424	0.15776	0.776595	0.0632741
6.63325	0.0583995	0.0679621	0.212375	0.0769621	0.777094	0.034454
6.6458	0.0601699	0.102866	0.237308	0.0778666	0.80356	0.0210673
6.65833	0.03145	0.0399634	0.189331	0.0795459	0.773223	0.025534
6.67083	-0.0138837	0.10645	0.151254	0.171359	0.739843	0.050748
6.68331	0.0313469	0.12339	0.228346	0.151269	0.79053	0.0589653
6.69577	0.0288629	0.039047	0.18506	0.0795034	0.765465	0.0295151
6.7082	0.0558144	0.0383175	0.201836	0.0619034	0.765349	0.0243175
6.733	0.0381016	0.0675377	0.229967	0.155853	0.74295	0.027868
6.74537	0.023271	0.0642398	0.186119	0.06355	0.788712	0.0208339
6.75771	0.0288704	0.0220356	0.15168	0.111398	0.759575	0.0287025
6.77003	0.0461187	0.0521914	0.210981	0.134947	0.775484	0.0374195
6.78233	0.0948932	0.0586053	0.243974	0.10114	0.783689	0.0429367
6.79461	0.0725022	0.0586141	0.221417	0.119944	0.790217	0.0534743
6.80686	0.0542644	0.0458638	0.184091	0.0856971	0.77409	0.0356795
6.8313	-0.0627579	0.117549	0.130529	0.128229	0.720268	0.081017
6.84349	0.0466683	0.0523421	0.185685	0.0995361	0.750477	0.0149962
6.85565	0.0311559	0.0529321	0.206851	0.140136	0.774435	0.0338603
6.8678	0.0616673	0.0496003	0.21674	0.117001	0.770727	0.0383059
6.89202	0.0472942	0.0457043	0.174677	0.103416	0.733739	0.0284303
6.90411	0.0295536	0.0810308	0.199945	0.114144	0.754313	0.0434588
6.9282	0.0285225	0.124336	0.169325	0.0960691	0.771458	0.0342735
6.94022	0.0249808	0.0622819	0.142229	0.0929672	0.723051	0.0299101
6.95222	0.039011	0.0386959	0.176384	0.0832986	0.764013	0.032109
6.96419	0.0123985	0.0737284	0.125395	0.0733611	0.707811	0.0401405
6.97615	0.0537159	0.0875984	0.128856	0.117454	0.749452	0.0443325
6.98809	0.0496126	0.0360502	0.165712	0.0779784	0.742858	0.0395756
7	0.0180075	0.0658959	0.120994	0.0703927	0.735221	0.0238098
7.02377	0.0522038	0.0433924	0.1607	0.0910511	0.741013	0.0276987
7.03562	0.0394119	0.0588501	0.161432	0.0830054	0.757	0.0196446
7.04746	0.102587	0.0557463	0.207334	0.103949	0.788813	0.0362541
7.05927	0.0131853	0.0750702	0.147309	0.0985792	0.740586	0.0343452
7.07107	0.0418595	0.0736544	0.120912	0.0958488	0.726017	0.0418043
7.08284	-0.00564159	0.0618826	0.154236	0.12726	0.73375	0.0517304
7.0946	0.0222277	0.0995224	0.140256	0.140292	0.687775	0.0442898
7.11805	-0.0177331	0.109458	0.0941706	0.144422	0.684739	0.0478634
7.12975	0.0374187	0.0619717	0.156914	0.0774883	0.740875	0.0406116
7.14143	0.0455454	0.0362406	0.159648	0.110182	0.72783	0.0257616
7.15309	0.0781012	0.142983	0.131293	0.0772771	0.735649	0.0495396
7.16473	0.0144565	0.0773831	0.16873	0.119874	0.709364	0.0265965
7.17635	0.0182346	0.0995974	0.180186	0.103285	0.75092	0.0298006
7.18795	0.0576562	0.0641986	0.147707	0.0768107	0.751948	0.030502
7.2111	0.0279321	0.0783259	0.127609	0.0932526	0.740246	0.0481916
7.22265	0.0208666	0.0701692	0.0981551	0.0757661	0.701455	0.0499058
7.23418	0.0179935	0.0580883	0.127163	0.0637807	0.704872	0.0289984
7.24569	0.0382689	0.0795855	0.117169	0.0919474	0.724215	0.0381411
7.26865	0.028703	0.0651119	0.107922	0.0421576	0.721012	0.0352115
7.28011	0.0331764	0.0635468	0.102324	0.0477501	0.693445	0.0298731
7.30297	0.00449846	0.184002	0.218208	0.150547	0.750929	0.0769996
7.31437	0.026741	0.024075	0.142317	0.0531333	0.719488	0.028959
7.32575	0.0362609	0.0622087	0.0963625	0.0795361	0.709703	0.026411
7.33712	0.0124238	0.0644934	0.146562	0.130664	0.692389	0.0173459
7.34847	0.0301	0.0659089	0.15801	0.100948	0.718515	0.0417008
7.3598	0.0573971	0.0572741	0.124376	0.0727687	0.677257	0.040292
7.37111	0.0313633	0.0325133	0.105538	0.0534147	0.711431	0.0446051
7.39369	-0.0240805	0.182137	0.210758	0.16223	0.775923	0.0774767
7.40495	0.0548791	0.0379687	0.11081	0.0891868	0.709523	0.0293137
7.4162	0.0519811	0.126423	0.199279	0.138714	0.757985	0.0458879
7.42743	0.0198792	0.0866146	0.114676	0.122062	0.686734	0.0480395
7.43864	0.0120762	0.0997034	0.0912994	0.0762532	0.66287	0.0681238
7.44983	0.0252931	0.0529336	0.0978446	0.121389	0.698243	0.0481495
7.46101	0.0851362	0.106191	0.098327	0.0905083	0.715992	0.0505065
7.48331	0.0864383	0.0987755	0.18005	0.108126	0.773913	0.056443
7.49444	0.0235144	0.112131	0.0454558	0.05647	0.659506	0.0299495
7.50555	-0.00439391	0.0721963	0.122179	0.0611447	0.688655	0.0241374
7.51665	0.0138056	0.0993515	0.0887665	0.0472549	0.656913	0.0400771
7.52773	0.0325814	0.1451	0.078199	0.122625	0.628535	0.0986631
7.53879	0.024892	0.0580364	0.113275	0.0425144	0.707917	0.0328923
7.54983	0.0239086	0.0774054	0.0938681	0.0768955	0.669468	0.0485422
7.57188	-0.00159856	0.0422272	0.0774556	0.060482	0.678057	0.0413566
7.58288	-0.00990693	0.108679	0.131771	0.0960482	0.69351	0.0660452
7.59386	0.0552563	0.058457	0.106748	0.0620401	0.68409	0.0289089
7.60482	0.0409921	0.0775993	0.0491708	0.0850685	0.690852	0.0438552
7.62671	-0.00861809	0.0635682	0.0641823	0.0861241	0.664778	0.0570695
7.63763	0.0398034	0.0528354	0.100053	0.0537919	0.677671	0.0293907
7.65942	0.0349326	0.153951	0.0576678	0.178427	0.646635	0.0568078
7.67029	0.0125324	0.0898722	0.0778962	0.0687513	0.702766	0.0702522
7.68115	0.00357685	0.0618975	0.0731777	0.117421	0.657434	0.0320505
7.69199	0.0458482	0.0703436	0.0932165	0.0530624	0.692934	0.0570004
7.70281	0.018046	0.0717469	0.0826847	0.0568447	0.692518	0.0269216
7.71362	0.0517415	0.0954701	0.070356	0.0852684	0.711984	0.0332844
7.72442	0.0111733	0.136087	0.150391	0.142136	0.679089	0.0624512
7.74597	0.0433267	0.0474314	0.0892907	0.0844532	0.686182	0.0443004
7.75672	0.0246829	0.087254	0.0920532	0.097889	0.668155	0.0820167
7.76745	0.051145	0.0703986	0.0568811	0.112888	0.680625	0.0260614
7.77817	-0.00706659	0.0716589	0.0620896	0.13852	0.618055	0.0380771
7.79957	0.0382574	0.0500709	0.103052	0.0834126	0.636156	0.0457851
7.81025	0.0198056	0.073211	0.0756877	0.0310306	0.638035	0.0642975
7.84219	-0.00442032	0.0641959	0.0979875	0.0540407	0.648706	0.0438523
7.85281	-0.0125016	0.102197	0.0945737	0.0748398	0.680225	0.0442844
7.86342	0.0202768	0.063629	0.0732148	0.117764	0.644268	0.0304065
7.87401	0.0619557	0.0555198	0.103007	0.101544	0.717434	0.0844941
7.88458	0.00955578	0.06094	0.0597223	0.0527694	0.679479	0.0533847
7.89515	-0.000799622	0.0496038	0.0889346	0.0793991	0.650675	0.0554005
7.91623	0.0115205	0.103024	0.0454871	0.140174	0.622966	0.0736826
7.92675	0.0189209	0.0378934	0.0829872	0.115817	0.635626	0.0384702
7.93725	0.031197	0.0928571	0.0267677	0.0548015	0.68823	0.0547692
7.96869	0.034156	0.048691	0.0644185	0.0830139	0.656719	0.0401454
7.97914	0.00616511	0.0591943	0.0554183	0.0886036	0.65522	0.052252
8	-0.0557135	0.232728	0.12414	0.16811	0.704717	0.0915225
8.01041	0.0234415	0.1157	0.0393038	0.11657	0.679096	0.062341
8.02081	0.0374083	0.0453939	0.100796	0.0990947	0.646226	0.0330244
8.03119	0.0105979	0.0798898	0.0495757	0.0975202	0.626688	0.0532965
8.04156	0.028378	0.0700376	0.155835	0.190698	0.59317	0.0897918
8.05191	0.0254245	0.0710459	0.0653115	0.134731	0.622305	0.0710497
8.06226	0.0403251	0.0882666	0.0928944	0.125566	0.611389	0.0515265
8.0829	0.0127135	0.0565651	0.122268	0.0545242	0.643448	0.0832917
8.09321	0.0167475	0.0898575	0.0803443	0.0869041	0.664092	0.0655361
8.1035	0.0250018	0.0634167	0.0781546	0.0943583	0.625523	0.0425321
8.11377	-0.008329	0.089415	0.0867546	0.0810962	0.635042	0.0762728
8.12404	-0.0221664	0.0845568	0.108387	0.0695737	0.617438	0.0653954
8.14453	0.0139254	0.0565896	0.0722662	0.0465159	0.627053	0.0447795
8.16497	0.00474306	0.238404	0.0718281	0.107309	0.631619	0.0983866
8.17517	0.00791695	0.0573021	0.0522105	0.10064	0.639645	0.0556144
8.18535	0.021973	0.077604	0.0401368	0.134048	0.640846	0.0583816
8.19553	-0.0121331	0.113325	0.0706993	0.105867	0.6652	0.0775992
8.20569	0.0073779	0.0455163	0.0393726	0.102802	0.625439	0.0661817
8.21584	0.0284689	0.0526714	0.0944525	0.101977	0.630044	0.057546
8.22598	0.00122429	0.152093	0.122924	0.0871571	0.610505	0.0573992
8.24621	0.0289198	0.121604	0.0610426	0.175537	0.633873	0.0785367
8.25631	0.0482757	0.0787786	0.0487304	0.117326	0.623841	0.0467759
8.2664	0.0195174	0.0862135	0.0695938	0.118244	0.635707	0.0521784
8.27647	0.0356663	0.166843	0.113782	0.229238	0.563776	0.0893621
8.29659	0.0434214	0.0919685	0.119127	0.124089	0.602868	0.0613145
8.30662	0.10129	0.106595	-0.0135437	0.168965	0.586216	0.079909
8.32666	0.0250353	0.123324	0.0287835	0.12387	0.690292	0.0439495
8.33667	0.0580276	0.0747801	0.102706	0.116938	0.597639	0.0368505
8.34666	0.0155287	0.0759374	0.0675116	0.11459	0.614323	0.0718431
8.35663	0.0240409	0.0985297	0.0334105	0.134928	0.617897	0.0574487
8.3666	0.0209234	0.143825	0.156946	0.140528	0.63067	0.0730454
8.37655	0.0163755	0.0713068	0.0674458	0.11502	0.60087	0.0628927
8.3865	-0.0323046	0.206242	0.0821912	0.199544	0.609379	0.126073
8.41625	-0.0184149	0.117126	0.101964	0.102044	0.626624	0.0814895
8.42615	-0.0226452	0.124409	0.0812139	0.106741	0.634427	0.0766778
8.43603	0.0607743	0.0921748	0.0570733	0.125843	0.587556	0.037978
8.44591	0.059854	0.170037	0.052966	0.183962	0.611093	0.083123
8.45577	0.0495218	0.0633261	0.0167902	0.146931	0.59439	0.0751717
8.46562	-0.00202619	0.0916425	0.0541926	0.0974204	0.630654	0.0760692
8.48528	0.0619682	0.199781	0.136261	0.210223	0.55403	0.0445833
8.4951	0.0780902	0.111294	0.0596276	0.154698	0.602819	0.0673702
8.5049	0.0432773	0.101383	0.103132	0.135944	0.596203	0.0618769
8.52447	-0.0235632	0.124868	0.0793173	0.101563	0.648951	0.0671971
8.53424	0.00464526	0.117935	0.0685696	0.0977161	0.616805	0.0714586
8.544	0.0640688	0.118478	0.115868	0.161152	0.556201	0.0752917
8.56349	0.099527	0.116422	0.102032	0.160332	0.549948	0.0695133
8.57321	0.0656751	0.0906463	0.0397511	0.107485	0.615514	0.0544788
8.59263	0.0737079	0.141712	0.0196666	0.17435	0.611767	0.0890709
8.62168	0.0501603	0.0695933	0.0573146	0.143784	0.580734	0.043624
8.65063	0.0293413	0.0977408	0.0754579	0.12651	0.611976	0.0772485
8.66025	0.0339544	0.0646606	0.0634182	0.133359	0.601549	0.061463
8.66987	-0.137218	0.221264	0.0913332	0.212101	0.611165	0.131072
8.67948	-0.09561	0.215703	0.113286	0.219975	0.580052	0.179155
8.68907	-0.0834364	0.231852	0.122451	0.199157	0.59164	0.127783
8.69866	-0.0902206	0.203967	0.08253	0.211587	0.619097	0.120466
8.7178	0.0413932	0.0983391	0.0457649	0.161943	0.610893	0.0561336
8.72735	0.0962744	0.126864	0.0294333	0.157932	0.578354	0.0648683
8.73689	0.0851543	0.0836512	0.0683153	0.179396	0.586463	0.0654261
8.74643	0.0311036	0.10004	0.0965122	0.12356	0.614712	0.0437798
8.76546	0.0478097	0.0715316	0.0825237	0.143712	0.58336	0.0604656
8.79394	0.0767851	0.0749476	0.0864853	0.175054	0.600679	0.0479735
8.80341	0.131618	0.143126	0.101204	0.158096	0.564554	0.0667413
8.81287	0.00254278	0.206685	0.0422768	0.134477	0.642921	0.0928996
8.82232	0.0308181	0.0725112	0.147614	0.182381	0.542272	0.0754299
8.83176	0.00936093	0.168976	9.81001e-05	0.125393	0.637452	0.0673936
8.84119	0.0855548	0.0933606	0.0994744	0.190553	0.542246	0.0483259
8.85061	0.106353	0.154634	-0.0102214	0.230105	0.586777	0.0761552
8.87881	0.125822	0.20713	0.0349677	0.257696	0.579458	0.0556578
8.88819	0.0953834	0.131558	0.0433588	0.196946	0.577958	0.130701
8.89757	0.0865849	0.0996221	0.039381	0.183306	0.594127	0.046841
8.91628	0.0129252	0.13063	0.0446401	0.158081	0.594598	0.0653107
8.95358	0.00575754	0.0848704	0.0926131	0.129708	0.579551	0.097891
8.96289	-0.0123905	0.120695	0.107563	0.160216	0.600133	0.0699923
8.98146	0.0660915	0.129127	0.118505	0.200162	0.564236	0.0934478
8.99074	0.0448504	0.112137	0.0442432	0.200527	0.590316	0.0743359
9	0.114935	0.101485	0.0810813	0.168278	0.583766	0.0706935
9.0185	0.107747	0.222019	0.0225618	0.202742	0.624649	0.104134
9.02774	0.0806216	0.195864	0.0326505	0.242786	0.57639	0.0791324
9.03696	0.0284624	0.0728848	0.101738	0.138882	0.579108	0.0794753
9.05539	0.161388	0.164329	0.096847	0.16218	0.573902	0.0509595
9.07377	0.125825	0.15311	0.105275	0.176536	0.579533	0.0547801
9.10128	0.00768602	0.279385	0.0262479	0.129746	0.636349	0.0952265
9.11043	0.0572118	0.123702	0.152277	0.252401	0.555177	0.0515557
9.11958	0.139407	0.241621	0.0140023	0.312835	0.556385	0.102733
9.12871	0.10124	0.0965477	0.135368	0.234559	0.573978	0.0464005
9.13783	0.0872462	0.173624	0.0161112	0.259563	0.592118	0.111456
9.14695	0.162917	0.204449	0.0810889	0.268245	0.580191	0.0725839
9.18332	0.0673116	0.126529	0.0393841	0.187052	0.590274	0.0823152
9.19239	0.0351813	0.196368	0.204855	0.26761	0.548955	0.104255
9.2105	0.0793946	0.094905	0.152226	0.176686	0.573799	0.093655
9.2376	-0.23325	0.324163	0.0927478	0.267324	0.568072	0.28694
9.24662	0.0681075	0.0592891	0.129794	0.16865	0.566931	0.0687787
9.25563	0.165897	0.1658	0.0484809	0.315515	0.562153	0.0787751
9.26463	0.12173	0.100332	0.132922	0.199422	0.559335	0.101548
9.27362	0.0883125	0.147555	0.0521508	0.236902	0.57202	0.0769225
9.2826	0.14992	0.29524	0.023568	0.226627	0.595921	0.101992
9.31844	0.10074	0.0957032	0.0995563	0.176401	0.571077	0.0713133
9.35414	0.129293	0.130802	0.094822	0.209679	0.573589	0.0539068
9.38083	0.0450547	0.421068	0.027142	0.215457	0.642486	0.104356
9.39858	0.134524	0.277461	0.0450797	0.307435	0.56592	0.0842937
9.40744	0.143359	0.193528	0.0829154	0.323336	0.570228	0.0827328
9.42514	0.146203	0.139607	0.0965575	0.25396	0.559921	0.0821126
9.43398	0.0448879	0.19837	0.205201	0.254722	0.533503	0.141159
9.45163	0.0864089	0.0767895	0.191636	0.239946	0.564197	0.140461
9.46044	0.112033	0.257812	0.0336252	0.114627	0.602744	0.146706
9.46925	0.0733397	0.103723	0.173003	0.215502	0.548753	0.135149
9.50438	0.142873	0.0953837	0.146064	0.178058	0.55276	0.109651
9.5219	0.0659519	0.053233	0.1115	0.170881	0.517843	0.125422
9.53065	0.176243	0.218867	0.0643012	0.322541	0.569352	0.0894842
9.53939	0.101412	0.0812405	0.102324	0.260634	0.548762	0.106485
9.55685	0.101433	0.296305	0.0347698	0.22057	0.624817	0.177476
9.57427	0.159194	0.17261	0.159228	0.232731	0.586156	0.0784853
9.59166	0.151645	0.151988	0.119231	0.201151	0.567286	0.0701597
9.66954	0.0458922	0.174507	0.216717	0.254537	0.56179	0.14399
9.67815	0.182822	0.201694	0.0792408	0.318977	0.539085	0.0773937
9.68676	0.0662908	0.168691	0.191318	0.276905	0.550074	0.156631
9.70395	0.0844676	0.0545107	0.193086	0.245835	0.551814	0.173349
9.73824	0.0819036	0.113235	0.160933	0.280265	0.532935	0.175056
9.75534	0.161186	0.169463	0.185507	0.196912	0.559395	0.13489
9.77241	0.115855	0.0943681	0.121708	0.150629	0.548883	0.115849
9.79796	0.184737	0.29987	0.0567962	0.337921	0.600123	0.158078
9.84039	0.136753	0.210098	0.127212	0.259683	0.555314	0.0579695
9.89949	0.0918244	0.175955	0.255687	0.35927	0.546127	0.178671
9.91632	0.0670536	0.133449	0.208142	0.325406	0.562889	0.17024
9.9415	0.147972	0.233335	0.104962	0.299541	0.56154	0.107373
9.94987	0.109018	0.0493685	0.24745	0.309675	0.558295	0.157578
9.96661	0.0558068	0.0896076	0.208435	0.230281	0.550781	0.185305
10.0167	0.130793	0.155515	0.198474	0.163995	0.599897	0.14895
10.0995	0.135744	0.17151	0.0977412	0.27952	0.522977	0.135422
10.1407	0.107055	0.187011	0.182912	0.423832	0.583385	0.170107
10.1571	0.121163	0.140886	0.240516	0.413368	0.582684	0.202152
10.1735	0.0725446	0.131535	0.20603	0.304637	0.533921	0.15037
10.2062	0.193754	0.0901853	0.274936	0.262103	0.59883	0.184113
10.2713	0.0916064	0.164174	0.189621	0.262996	0.571257	0.173528
10.3763	0.165641	0.189647	0.153782	0.496443	0.598128	0.262495
10.3923	0.106211	0.161751	0.118874	0.472856	0.576425	0.157075
10.4083	0.148799	0.146743	0.242189	0.39906	0.579539	0.205783
10.4563	0.2355	0.136307	0.237784	0.330872	0.619162	0.189627
10.6066	0.224893	0.197347	0.157749	0.582612	0.614785	0.288549
10.6223	0.147582	0.225205	0.172427	0.531693	0.604341	0.23231
10.6536	0.291527	0.17481	0.192149	0.429163	0.615184	0.227286
10.8474	0.129642	0.228772	0.151534	0.606013	0.584311	0.217766
10.8628	0.15198	0.300189	0.190404	0.577808	0.626215	0.202365
11.083	0.122808	0.31186	0.128591	0.740058	0.57007	0.172453
11.3137	0.0456779	0.290374	0.0624433	0.802292	0.625659	0.247194
Fig. 8d	Caprin1 cross-correlations with ATP-Mg, Na and Cl
r/b	ATP-Mg (Avg)	ATP-Mg (Std)	Na (Avg)	Na (Std)	Cl (Avg)	Cl (Std)
0	16.9574	0.785613	1.85119	0.0534081	5.32055	0.149775
0.408248	15.2737	0.755863	1.84197	0.0545134	4.55335	0.140646
0.57735	14.0839	0.730309	1.84154	0.0553922	4.08192	0.135712
0.707107	13.1722	0.707493	1.84263	0.0559258	3.76262	0.132135
0.816497	12.4306	0.685494	1.84197	0.0561768	3.53118	0.129033
0.912871	11.8001	0.667637	1.8383	0.0562217	3.35109	0.126854
1	11.2486	0.650207	1.83174	0.0560052	3.20573	0.124723
1.1547	10.3101	0.619323	1.81064	0.0554027	2.98225	0.121468
1.22474	9.90236	0.60283	1.79751	0.054924	2.89233	0.119606
1.29099	9.52741	0.586347	1.78304	0.0548832	2.81411	0.118254
1.35401	9.17842	0.573256	1.76772	0.0541841	2.74236	0.116679
1.41421	8.852	0.562317	1.75156	0.0531652	2.67604	0.115062
1.47196	8.54985	0.549285	1.73557	0.0531868	2.61854	0.114233
1.52753	8.26458	0.536676	1.71932	0.0524369	2.56364	0.112616
1.63299	7.74849	0.506983	1.6877	0.0529188	2.46916	0.111422
1.68325	7.50648	0.499361	1.67155	0.0515081	2.42279	0.109174
1.73205	7.28123	0.488137	1.65631	0.0513162	2.3818	0.10802
1.77951	7.06447	0.480872	1.64067	0.0501568	2.34083	0.10627
1.82574	6.8628	0.466946	1.62656	0.0506368	2.3052	0.105504
1.87083	6.66762	0.457141	1.612	0.0499805	2.26907	0.103894
1.91485	6.4794	0.450715	1.59711	0.0489977	2.23291	0.102322
2	6.13536	0.429497	1.57064	0.0487331	2.17046	0.0996795
2.04124	5.97734	0.419178	1.55826	0.0486362	2.14246	0.0996332
2.08167	5.82219	0.4097	1.54571	0.0483465	2.11366	0.0983861
2.12132	5.67397	0.399876	1.53376	0.0485229	2.08653	0.0978035
2.19848	5.39309	0.385169	1.50955	0.0474674	2.03224	0.0939758
2.23607	5.26369	0.374587	1.49908	0.0477147	2.00918	0.0938004
2.3094	5.01631	0.361342	1.4765	0.0460596	1.9604	0.0902947
2.34521	4.89794	0.353138	1.46611	0.0462502	1.93757	0.0890117
2.38048	4.78429	0.346458	1.45585	0.0462413	1.91506	0.0875977
2.41523	4.67701	0.337646	1.44635	0.0458499	1.895	0.0871321
2.44949	4.57181	0.331683	1.43642	0.0456343	1.87362	0.0857849
2.48328	4.47553	0.322271	1.4298	0.0465539	1.8583	0.0895811
2.51661	4.37336	0.317001	1.41836	0.045521	1.83522	0.0843634
2.58199	4.18964	0.303024	1.40189	0.045715	1.79999	0.0849209
2.61406	4.09918	0.297594	1.39203	0.0448292	1.77985	0.0810366
2.64575	4.01371	0.291457	1.38285	0.0435678	1.76158	0.0788214
2.67706	3.92841	0.286841	1.37419	0.0446756	1.74322	0.0760967
2.70801	3.85101	0.279506	1.36778	0.0444759	1.72962	0.0788865
2.73861	3.77256	0.273823	1.35891	0.0434905	1.71185	0.0758366
2.76887	3.69829	0.267524	1.35218	0.0435996	1.69762	0.0769287
2.82843	3.55043	0.258169	1.33598	0.0448496	1.66356	0.0687281
2.85774	3.48552	0.251852	1.33011	0.0430467	1.65232	0.073416
2.88675	3.41853	0.246487	1.32316	0.043141	1.63725	0.0712374
2.91548	3.35578	0.24118	1.3173	0.0426189	1.62479	0.073123
2.94392	3.2913	0.235562	1.30941	0.0412777	1.61036	0.0705072
2.97209	3.23101	0.231335	1.30338	0.0419144	1.59765	0.0708509
3	3.17131	0.227183	1.29686	0.042242	1.5845	0.0694316
3.05505	3.05598	0.217395	1.28294	0.0405433	1.5581	0.0648875
3.08221	3.00148	0.213326	1.27799	0.0421508	1.54654	0.0644426
3.10913	2.95137	0.209661	1.27309	0.0419169	1.53668	0.0690316
3.13581	2.898	0.204661	1.26631	0.0410167	1.52375	0.0647355
3.18852	2.7965	0.195187	1.254	0.0393093	1.49984	0.0595857
3.21455	2.75042	0.191564	1.24944	0.0391557	1.49004	0.0618246
3.26599	2.66485	0.18984	1.24327	0.0453475	1.47141	0.0698685
3.2914	2.61591	0.179882	1.23416	0.0393508	1.45906	0.0603912
3.31662	2.57298	0.176685	1.22931	0.0397396	1.44937	0.0596398
3.34166	2.52943	0.1735	1.22349	0.0387609	1.4391	0.0578371
3.3665	2.49032	0.170064	1.2197	0.0401749	1.43013	0.0580433
3.39116	2.45161	0.167775	1.2153	0.0396373	1.42128	0.0602605
3.41565	2.40826	0.161307	1.20781	0.0374825	1.40974	0.0504891
3.4641	2.33697	0.157057	1.20168	0.0384803	1.39404	0.0581732
3.48807	2.30037	0.152082	1.19632	0.0371962	1.38513	0.0556507
3.51188	2.26498	0.14952	1.19186	0.0372048	1.37645	0.0544902
3.53553	2.22859	0.143841	1.18663	0.0351497	1.36713	0.0503264
3.55903	2.19377	0.140133	1.18147	0.0341942	1.35837	0.0473747
3.58236	2.16326	0.140081	1.17909	0.0369453	1.3517	0.0496015
3.60555	2.1299	0.134957	1.17382	0.034106	1.34291	0.047848
3.65148	2.0729	0.132691	1.16795	0.0368199	1.32988	0.0537749
3.67423	2.04013	0.127911	1.16327	0.0353583	1.32115	0.0483383
3.69685	2.01557	0.13091	1.16223	0.0397157	1.31506	0.0553698
3.71932	1.98304	0.123001	1.1564	0.035785	1.30659	0.0477752
3.74166	1.95527	0.121125	1.15271	0.0348378	1.30006	0.049045
3.76386	1.92914	0.119019	1.14984	0.0360896	1.29365	0.0507063
3.78594	1.90109	0.115122	1.14574	0.0347359	1.28649	0.0467829
3.82971	1.84461	0.109092	1.13723	0.0340658	1.27177	0.0359529
3.85141	1.82317	0.106637	1.13493	0.032763	1.26608	0.0441815
3.87298	1.79895	0.104347	1.13178	0.0328523	1.26017	0.0426139
3.89444	1.78207	0.110435	1.13119	0.0377945	1.25706	0.0528585
3.937	1.72777	0.0964891	1.12173	0.030776	1.2414	0.0408556
3.95811	1.70701	0.0958248	1.11977	0.0323394	1.2363	0.0418744
4	1.66022	0.0900443	1.1132	0.0310867	1.22302	0.0370182
4.02078	1.64267	0.0895028	1.11098	0.0320378	1.22006	0.0376779
4.04145	1.62177	0.0867055	1.10778	0.0309522	1.21381	0.0402746
4.06202	1.59874	0.0831382	1.1045	0.0297276	1.20755	0.0358929
4.08248	1.58155	0.0820132	1.10225	0.0307217	1.20255	0.0401347
4.10284	1.56246	0.0807397	1.10001	0.0306793	1.19784	0.0380288
4.12311	1.54665	0.0823124	1.09821	0.0329782	1.19367	0.042128
4.16333	1.50778	0.0760489	1.09202	0.030343	1.1833	0.0387686
4.1833	1.49215	0.0771766	1.09131	0.0324531	1.17916	0.039885
4.20317	1.47242	0.0724465	1.08765	0.030109	1.17317	0.0386865
4.22295	1.45308	0.0683504	1.08358	0.0279216	1.16784	0.0347137
4.24264	1.4436	0.0753963	1.08515	0.033514	1.16681	0.0415218
4.26224	1.42099	0.0660508	1.07965	0.0285207	1.15955	0.0345208
4.28174	1.40606	0.0659265	1.07832	0.029333	1.15585	0.034474
4.33974	1.36028	0.0617525	1.07175	0.029301	1.14278	0.0370994
4.3589	1.33677	0.0548197	1.06618	0.0243855	1.13516	0.0255136
4.37798	1.32654	0.0550982	1.06646	0.0263214	1.13234	0.0310246
4.39697	1.31282	0.0543175	1.06422	0.0266776	1.12914	0.0289868
4.41588	1.30004	0.0531155	1.06125	0.0262452	1.12558	0.0326628
4.43471	1.28664	0.0523953	1.06012	0.0266335	1.12144	0.0334539
4.47214	1.26524	0.0549087	1.05865	0.0303695	1.11653	0.0383839
4.49073	1.24345	0.0470815	1.05385	0.0246752	1.10901	0.025559
4.50925	1.23236	0.0460423	1.05298	0.0257393	1.10558	0.028009
4.52769	1.22563	0.050396	1.05425	0.0295368	1.10472	0.0312361
4.56435	1.19858	0.0448599	1.04877	0.0268693	1.09659	0.0301362
4.58258	1.18939	0.0463052	1.04714	0.0282467	1.09418	0.0342533
4.6188	1.15368	0.0358539	1.03617	0.0191183	1.08167	0.0229483
4.63681	1.14939	0.0374197	1.03983	0.0238015	1.08168	0.0264152
4.65475	1.14376	0.041386	1.03882	0.0266604	1.08084	0.0332535
4.67262	1.13041	0.0375958	1.0371	0.0247152	1.07655	0.0294202
4.69042	1.1136	0.033414	1.0334	0.0218835	1.07071	0.0240359
4.70815	1.10081	0.034177	1.03267	0.0222671	1.06628	0.0202798
4.72582	1.09738	0.0333539	1.03257	0.0236452	1.0666	0.026071
4.76095	1.07281	0.0319544	1.02783	0.0214177	1.05786	0.0197632
4.77842	1.06766	0.0305461	1.02643	0.0224003	1.05739	0.0261513
4.79583	1.059	0.030461	1.02714	0.0235344	1.05533	0.0237916
4.81318	1.0463	0.0278566	1.02399	0.0216263	1.05084	0.0231662
4.83046	1.0371	0.0273055	1.02192	0.0208172	1.04748	0.0236933
4.84768	1.03309	0.0295383	1.02399	0.0246649	1.04779	0.0278535
4.86484	1.01322	0.0311246	1.01978	0.0219983	1.03923	0.0172099
4.89898	1.00063	0.0253852	1.01797	0.0209338	1.03596	0.0188329
4.91596	0.996818	0.0257235	1.01715	0.022064	1.03533	0.0250518
4.93288	0.987914	0.0245386	1.01534	0.0215361	1.033	0.0237097
4.94975	0.983361	0.0257216	1.01503	0.0231896	1.03251	0.0259396
4.96655	0.991866	0.049996	1.0229	0.037912	1.03721	0.0454699
4.98331	0.962891	0.0227566	1.01152	0.0202861	1.02467	0.0203811
5	0.954221	0.022603	1.00931	0.0198125	1.0221	0.0214898
5.03322	0.942453	0.0227835	1.01054	0.0217753	1.01914	0.0234224
5.04975	0.931226	0.0215553	1.00678	0.0194818	1.01477	0.0187692
5.06623	0.929774	0.0223861	1.007	0.0218149	1.0157	0.024655
5.08265	0.914612	0.022745	1.00458	0.0195603	1.00922	0.016962
5.11534	0.916705	0.0293484	1.00727	0.0274292	1.01282	0.0321722
5.1316	0.894977	0.0216141	0.999274	0.0175565	1.00288	0.018197
5.16398	0.900871	0.0321643	1.00497	0.0289533	1.00914	0.0353161
5.18009	0.877265	0.0204524	0.9984	0.0184351	0.997891	0.0178601
5.19615	0.870973	0.0210044	0.997861	0.0191803	0.99581	0.017405
5.21217	0.855296	0.0308749	0.987116	0.0156922	0.987985	0.0168318
5.22813	0.861518	0.0201606	0.995668	0.0189691	0.992909	0.018898
5.24404	0.844727	0.0272146	0.989224	0.0155408	0.985218	0.0142865
5.25991	0.839954	0.0252858	0.990732	0.0170576	0.983922	0.0130154
5.2915	0.826573	0.0295627	0.984688	0.0153745	0.979296	0.0146904
5.30723	0.842668	0.0263199	0.996106	0.0258926	0.989803	0.0284233
5.32291	0.828928	0.0205428	0.991882	0.0187553	0.982548	0.0194232
5.33854	0.820658	0.0219091	0.989178	0.0174209	0.979457	0.0183159
5.35413	0.803466	0.0295678	0.986618	0.0188414	0.971235	0.0141621
5.36967	0.810792	0.0220701	0.988424	0.0181371	0.976884	0.018207
5.38516	0.807897	0.0213962	0.989225	0.0181653	0.975516	0.0192946
5.41603	0.800061	0.0242824	0.988729	0.0226217	0.975582	0.0214953
5.43139	0.795464	0.0205046	0.988917	0.0189765	0.970698	0.019075
5.44671	0.789831	0.023305	0.986383	0.0197225	0.970987	0.0201938
5.46199	0.784152	0.0220363	0.985522	0.0178029	0.967727	0.0183785
5.47723	0.767571	0.0281404	0.978709	0.0143538	0.960567	0.0122636
5.49242	0.76402	0.0272767	0.977771	0.0140691	0.95856	0.0114478
5.50757	0.766498	0.02522	0.980421	0.0162342	0.9615	0.0165369
5.53775	0.760065	0.0263576	0.979599	0.0176966	0.960432	0.0167703
5.55278	0.747715	0.027977	0.975842	0.0144023	0.954262	0.0122924
5.56776	0.749419	0.0269693	0.977336	0.0155325	0.9559	0.0157541
5.58271	0.746197	0.0250079	0.979574	0.0160219	0.955178	0.0157482
5.61249	0.734538	0.0280249	0.975256	0.0147104	0.950621	0.0131476
5.62731	0.715727	0.0389558	0.966493	0.0150244	0.941657	0.0148143
5.65685	0.707766	0.0380759	0.968775	0.0222385	0.934593	0.0209595
5.67157	0.714144	0.0308896	0.97081	0.0131883	0.942453	0.010784
5.68624	0.715176	0.028747	0.972143	0.0140302	0.943681	0.0118345
5.70088	0.714569	0.028121	0.973543	0.0154605	0.944711	0.0138483
5.71548	0.710705	0.0293686	0.973657	0.0164354	0.943503	0.0144242
5.73004	0.705652	0.0300946	0.970964	0.0131308	0.940758	0.0132741
5.74456	0.709081	0.0264912	0.974546	0.0164121	0.94283	0.0162147
5.7735	0.694352	0.0282085	0.969837	0.0122607	0.935592	0.0124798
5.78792	0.699404	0.0304998	0.971881	0.0163123	0.93988	0.0180243
5.8023	0.680714	0.0381765	0.962941	0.0128961	0.930555	0.0125139
5.81664	0.684037	0.0360545	0.96494	0.0143176	0.933428	0.0144091
5.83095	0.692136	0.0324453	0.970083	0.0170913	0.937324	0.0204095
5.84523	0.687259	0.0309016	0.970859	0.0170168	0.936451	0.0170602
5.85947	0.674952	0.0324314	0.965814	0.0120068	0.929895	0.0118134
5.88784	0.663239	0.0420135	0.958586	0.0130252	0.924495	0.016183
5.90198	0.668158	0.0338255	0.964812	0.0125102	0.927821	0.0121365
5.91608	0.658329	0.0360221	0.963402	0.0128224	0.92438	0.0119149
5.93015	0.641802	0.0424119	0.955689	0.0135705	0.914354	0.0162674
5.94418	0.663276	0.0360389	0.963826	0.0137589	0.926744	0.0146556
5.95819	0.661198	0.0300986	0.966328	0.0136779	0.925405	0.0137574
5.97216	0.666656	0.0351185	0.968482	0.0188966	0.930626	0.018809
6	0.653874	0.0346787	0.965045	0.0142522	0.924637	0.0149485
6.01387	0.627271	0.0419652	0.954937	0.0121833	0.910013	0.0147022
6.02771	0.629252	0.0415157	0.956161	0.0109837	0.912459	0.01255
6.04152	0.636467	0.0377165	0.958927	0.0110076	0.916594	0.0104136
6.06905	0.637227	0.0370474	0.960777	0.0126766	0.917933	0.0127012
6.08276	0.634723	0.040815	0.957844	0.0135848	0.916645	0.0148409
6.1101	0.612023	0.0445371	0.953162	0.0113877	0.905705	0.0136804
6.12372	0.622233	0.0421463	0.955247	0.0114503	0.911289	0.0142863
6.13732	0.625109	0.037279	0.957241	0.00883813	0.911048	0.0123939
6.15088	0.622839	0.0379377	0.958871	0.0102402	0.912059	0.0113045
6.16441	0.616441	0.0367158	0.95747	0.0119651	0.908775	0.0133107
6.17792	0.615267	0.039634	0.955951	0.00939547	0.908372	0.0118389
6.19139	0.619326	0.0374622	0.958733	0.0109357	0.911166	0.0126266
6.21825	0.628593	0.0396809	0.961409	0.0181786	0.917756	0.0181546
6.23164	0.616453	0.0393578	0.958184	0.0122663	0.911081	0.0132272
6.245	0.599824	0.0424376	0.952357	0.0085192	0.902405	0.0118688
6.25833	0.660771	0.0457434	0.97557	0.0320172	0.932346	0.0402221
6.27163	0.60308	0.0403741	0.954643	0.00988321	0.905682	0.0108344
6.2849	0.593726	0.0456632	0.951253	0.00980885	0.901399	0.0137072
6.29815	0.611373	0.0368855	0.959625	0.012077	0.909131	0.0150546
6.33772	0.596096	0.0426388	0.954369	0.0107907	0.903397	0.0120209
6.35085	0.599204	0.0417364	0.954962	0.0110826	0.904347	0.01311
6.36396	0.587193	0.0439471	0.951558	0.00914251	0.898572	0.0130045
6.37704	0.564397	0.0499008	0.94324	0.0110354	0.887593	0.0197936
6.3901	0.585086	0.0427018	0.950367	0.0075703	0.897318	0.0127868
6.40312	0.57368	0.0480372	0.947257	0.00910045	0.893497	0.0157307
6.4291	0.572498	0.0501163	0.946994	0.0114191	0.892942	0.0170819
6.44205	0.56591	0.0460353	0.946232	0.00797722	0.889441	0.0143355
6.45497	0.587694	0.0436209	0.953578	0.0111171	0.901245	0.0138543
6.46787	0.57015	0.0461115	0.947057	0.00737594	0.892045	0.014643
6.49359	0.545671	0.0574896	0.938904	0.0175749	0.880023	0.0266679
6.50641	0.573954	0.0464015	0.949954	0.00949343	0.895188	0.0127202
6.53197	0.669428	0.0547601	0.982414	0.0383351	0.935939	0.048708
6.54472	0.561888	0.0442539	0.947871	0.00791619	0.889471	0.0138338
6.55744	0.559325	0.0468533	0.946767	0.00742734	0.887722	0.0142064
6.57013	0.572118	0.0474422	0.950161	0.0109534	0.89521	0.0137675
6.58281	0.558834	0.0492284	0.945754	0.00985089	0.887967	0.0163326
6.59545	0.569035	0.0451764	0.950123	0.00825883	0.893419	0.0121521
6.60808	0.568123	0.0418667	0.949457	0.0076791	0.892612	0.0105327
6.63325	0.557772	0.0453054	0.946393	0.00520135	0.88742	0.0124361
6.6458	0.577668	0.0479447	0.951719	0.0146944	0.89787	0.0168329
6.65833	0.55105	0.0480966	0.944345	0.00712392	0.884728	0.0157387
6.67083	0.523414	0.0527136	0.93757	0.0127274	0.8726	0.0223646
6.68331	0.547159	0.0492643	0.946414	0.0109596	0.885637	0.0144318
6.69577	0.538143	0.0528709	0.941086	0.010612	0.879216	0.0197043
6.7082	0.538805	0.0507668	0.941938	0.00746972	0.880307	0.0171922
6.733	0.550566	0.0418502	0.945568	0.00794447	0.884518	0.0125844
6.74537	0.556211	0.051818	0.945947	0.0136383	0.887691	0.0188511
6.75771	0.530369	0.0516513	0.939551	0.00913902	0.876149	0.0195455
6.77003	0.545517	0.0500766	0.945229	0.00799021	0.885049	0.0141816
6.78233	0.561648	0.0470113	0.95053	0.0104314	0.891456	0.0129427
6.79461	0.551525	0.0510279	0.946915	0.0102355	0.888755	0.015236
6.80686	0.528852	0.0558347	0.93945	0.0122484	0.876672	0.0216614
6.8313	0.498834	0.0541785	0.93276	0.0164218	0.861634	0.0265543
6.84349	0.529492	0.0510875	0.940695	0.00766742	0.876843	0.017531
6.85565	0.538525	0.0460853	0.943909	0.00707212	0.881314	0.0126287
6.8678	0.530415	0.0481685	0.941277	0.00589123	0.877061	0.0145339
6.89202	0.516085	0.0509365	0.937636	0.00926476	0.870343	0.0191471
6.90411	0.520505	0.0531328	0.939639	0.00872028	0.873911	0.0180462
6.9282	0.544696	0.0556697	0.944148	0.0159803	0.884265	0.0214329
6.94022	0.501682	0.0557016	0.932358	0.0132645	0.863675	0.0254022
6.95222	0.526386	0.0547324	0.940772	0.0101703	0.876741	0.0191282
6.96419	0.491433	0.0638743	0.929113	0.0224336	0.858594	0.0344842
6.97615	0.52144	0.0610531	0.937425	0.0199581	0.873076	0.0281685
6.98809	0.517094	0.0526823	0.938713	0.00762273	0.872027	0.0179539
7	0.493311	0.0608278	0.931557	0.0176548	0.860691	0.0292959
7.02377	0.520048	0.0541526	0.939672	0.00819283	0.874527	0.0175574
7.03562	0.511777	0.0569328	0.936598	0.0120473	0.870691	0.0226248
7.04746	0.525293	0.0552735	0.941817	0.0100014	0.87651	0.0169188
7.05927	0.496778	0.0563609	0.933776	0.0125689	0.863085	0.0233702
7.07107	0.492851	0.0627436	0.930851	0.0205069	0.86089	0.0317682
7.08284	0.503302	0.0517615	0.935992	0.0101322	0.865645	0.0199877
7.0946	0.479426	0.0522332	0.928659	0.0183694	0.853599	0.0264066
7.11805	0.474149	0.0644695	0.926668	0.0251625	0.852321	0.0369937
7.12975	0.497986	0.0572612	0.934863	0.0124903	0.863838	0.0230948
7.14143	0.495989	0.0547387	0.932925	0.0121632	0.862844	0.0235091
7.15309	0.510635	0.0633099	0.936833	0.0191071	0.871989	0.0274194
7.16473	0.492594	0.0489667	0.932601	0.0143921	0.860652	0.0207014
7.17635	0.505955	0.0524149	0.937288	0.00861986	0.868667	0.015811
7.18795	0.507164	0.0571023	0.937847	0.0100492	0.870075	0.0199441
7.2111	0.481175	0.06168	0.930468	0.01875	0.856515	0.0303924
7.22265	0.473681	0.0618979	0.928266	0.0194776	0.852369	0.0305208
7.23418	0.481277	0.0572974	0.930187	0.0150187	0.855658	0.0252896
7.24569	0.482475	0.0602172	0.931054	0.0172044	0.857005	0.0284301
7.26865	0.488581	0.0679963	0.930759	0.0255118	0.859886	0.0352754
7.28011	0.467725	0.0632307	0.926068	0.021684	0.849688	0.0328161
7.30297	0.531133	0.0583653	0.942966	0.014934	0.881701	0.0196799
7.31437	0.484636	0.0589335	0.931095	0.0157192	0.858125	0.0267526
7.32575	0.477071	0.0649808	0.929433	0.0220869	0.854659	0.0333697
7.33712	0.466774	0.0513464	0.927068	0.0209887	0.849799	0.0244491
7.34847	0.480311	0.0550824	0.930941	0.0133887	0.856386	0.0225998
7.3598	0.46987	0.054897	0.9275	0.0165036	0.851632	0.0247259
7.37111	0.467106	0.0619358	0.927102	0.0200502	0.850491	0.0312432
7.39369	0.520402	0.0521438	0.942588	0.0116268	0.877581	0.0153837
7.40495	0.468104	0.0601465	0.927187	0.0198665	0.850398	0.0307255
7.4162	0.517317	0.053012	0.942095	0.0105538	0.875368	0.0152832
7.42743	0.468155	0.0554106	0.928323	0.0164399	0.850683	0.0236089
7.43864	0.457133	0.0572351	0.926172	0.0189792	0.845585	0.0272965
7.44983	0.450946	0.0574843	0.923102	0.0223479	0.842212	0.0312902
7.46101	0.477486	0.0659696	0.930479	0.0220913	0.856204	0.0334705
7.48331	0.508642	0.0558566	0.939748	0.00974607	0.869963	0.017
7.49444	0.459837	0.0562432	0.926108	0.0189158	0.84664	0.0281935
7.50555	0.466103	0.0609909	0.927783	0.0189237	0.850825	0.0290988
7.51665	0.444071	0.0618937	0.921716	0.0260218	0.838137	0.0346722
7.52773	0.458918	0.0819823	0.923652	0.0428384	0.845628	0.0497579
7.53879	0.468754	0.0626691	0.928051	0.0193227	0.851728	0.0296899
7.54983	0.451689	0.0592154	0.923846	0.0219738	0.843082	0.0309636
7.57188	0.444951	0.0660595	0.92027	0.0306755	0.839094	0.0397113
7.58288	0.460956	0.0549481	0.927534	0.017317	0.847823	0.0231944
7.59386	0.453318	0.0573813	0.92346	0.0219408	0.843373	0.0298323
7.60482	0.458848	0.076259	0.924237	0.0363605	0.847096	0.04547
7.62671	0.44083	0.0645659	0.921363	0.0295253	0.837777	0.039121
7.63763	0.449519	0.0600807	0.923263	0.0224535	0.842259	0.0317151
7.65942	0.423688	0.0500339	0.917759	0.0323227	0.828079	0.031824
7.67029	0.453935	0.0570396	0.925909	0.0189879	0.844906	0.026369
7.68115	0.437159	0.0552257	0.920792	0.0252582	0.836153	0.0305315
7.69199	0.454718	0.0621583	0.925637	0.0209045	0.845965	0.0309422
7.70281	0.458592	0.0641874	0.926076	0.0233645	0.847764	0.0340022
7.71362	0.48146	0.0714273	0.930257	0.0280039	0.859287	0.036435
7.72442	0.430199	0.0518186	0.918072	0.0286004	0.832995	0.0285887
7.74597	0.445512	0.0565392	0.922525	0.0210914	0.840753	0.028254
7.75672	0.447503	0.0577005	0.924677	0.0199084	0.842181	0.0273103
7.76745	0.443543	0.0584753	0.923557	0.0233264	0.839555	0.0312236
7.77817	0.424211	0.0567709	0.917489	0.031362	0.830204	0.0362132
7.79957	0.433786	0.0596664	0.919483	0.0291052	0.834636	0.0352958
7.81025	0.434543	0.0676475	0.919952	0.0321906	0.834617	0.0395224
7.84219	0.436411	0.0640742	0.919957	0.0297311	0.836097	0.0364771
7.85281	0.442776	0.0664209	0.921899	0.0270609	0.83992	0.034957
7.86342	0.425791	0.0534339	0.918385	0.0282976	0.831053	0.0315378
7.87401	0.465366	0.0634554	0.92891	0.0200157	0.851025	0.0312717
7.88458	0.451265	0.0710003	0.924312	0.0302548	0.843744	0.0398696
7.89515	0.431136	0.0623389	0.919592	0.0284978	0.834156	0.0367303
7.91623	0.421345	0.0560562	0.91822	0.0292191	0.82905	0.034059
7.92675	0.417689	0.0514073	0.916295	0.0310195	0.826678	0.0312009
7.93725	0.447199	0.0751718	0.92289	0.0372714	0.842038	0.0463433
7.96869	0.432264	0.0609036	0.919977	0.027797	0.834693	0.0355316
7.97914	0.42972	0.0568234	0.920397	0.0248003	0.833851	0.0313076
8	0.450265	0.0563315	0.925495	0.0215591	0.845526	0.0227777
8.01041	0.432871	0.0674942	0.920311	0.0341648	0.835523	0.0433751
8.02081	0.433078	0.0553339	0.920536	0.0268739	0.835536	0.030362
8.03119	0.41483	0.0509444	0.916666	0.0305098	0.826144	0.0299872
8.04156	0.397011	0.0445855	0.911518	0.046419	0.817017	0.0389362
8.05191	0.415627	0.0514738	0.916876	0.0293284	0.82667	0.0298041
8.06226	0.407925	0.0517249	0.913916	0.0352677	0.822872	0.0354777
8.0829	0.441481	0.0667896	0.922723	0.027395	0.83915	0.0356064
8.09321	0.440276	0.0760765	0.921868	0.0397349	0.838461	0.0467313
8.1035	0.416313	0.0585193	0.916611	0.0333991	0.82672	0.036547
8.11377	0.427362	0.0679923	0.918955	0.0339983	0.83215	0.0402225
8.12404	0.415454	0.0623293	0.914955	0.0362551	0.826247	0.0394427
8.14453	0.416699	0.0621634	0.915925	0.0351739	0.826798	0.0387468
8.16497	0.44687	0.0844829	0.922525	0.0460708	0.841753	0.0512765
8.17517	0.424103	0.0635102	0.918245	0.0327243	0.831211	0.0389517
8.18535	0.417395	0.0528704	0.918056	0.0299514	0.827372	0.0317505
8.19553	0.426998	0.0755468	0.918156	0.0442577	0.832529	0.0519986
8.20569	0.413715	0.0561463	0.916517	0.0324944	0.82521	0.0345846
8.21584	0.420226	0.0549504	0.917997	0.0274902	0.829617	0.0318275
8.22598	0.407047	0.0497092	0.914036	0.0343657	0.823053	0.0318193
8.24621	0.416387	0.0683827	0.915472	0.0419787	0.827967	0.0495285
8.25631	0.41073	0.0561912	0.915705	0.037212	0.824626	0.038067
8.2664	0.412796	0.0571487	0.915654	0.0323461	0.825909	0.0364771
8.27647	0.385214	0.0433705	0.909466	0.0505291	0.812332	0.0429593
8.29659	0.399422	0.0467393	0.913343	0.0395766	0.819196	0.0351149
8.30662	0.398798	0.0483992	0.914026	0.0360494	0.818344	0.0334163
8.32666	0.430261	0.0674426	0.920035	0.0349072	0.834439	0.0435625
8.33667	0.394897	0.0481298	0.911273	0.0395489	0.816918	0.0365685
8.34666	0.406987	0.0500654	0.915059	0.0314198	0.823128	0.030937
8.35663	0.403081	0.0533229	0.913798	0.0367597	0.82106	0.0372564
8.3666	0.417944	0.0524599	0.917184	0.0287207	0.829085	0.0285929
8.37655	0.402101	0.0565562	0.913923	0.0393301	0.819726	0.0370515
8.3865	0.42855	0.087399	0.919196	0.0572937	0.832388	0.0569431
8.41625	0.418181	0.0689096	0.916771	0.0402779	0.828288	0.0442869
8.42615	0.425001	0.0680214	0.918683	0.0346267	0.8314	0.0404579
8.43603	0.393869	0.0465143	0.911871	0.0395774	0.816529	0.0345527
8.44591	0.399694	0.0528444	0.913298	0.038633	0.819464	0.0387511
8.45577	0.402406	0.0548257	0.914511	0.0378919	0.820155	0.0367982
8.46562	0.410085	0.0640334	0.91487	0.0413189	0.824887	0.0455414
8.48528	0.3727	0.0425127	0.90918	0.0582777	0.807343	0.0503813
8.4951	0.393191	0.0454699	0.912429	0.0374723	0.816181	0.0325608
8.5049	0.3907	0.0507411	0.911749	0.0447287	0.815597	0.0413527
8.52447	0.412345	0.0548419	0.915935	0.0311203	0.825977	0.0347599
8.53424	0.408154	0.0595975	0.914151	0.0369152	0.824173	0.0413979
8.544	0.375653	0.0420586	0.908547	0.0528239	0.808155	0.0447084
8.56349	0.376621	0.0420879	0.908708	0.0511282	0.808429	0.0429499
8.57321	0.403743	0.0531402	0.914199	0.035029	0.821589	0.0358593
8.59263	0.393182	0.0468507	0.912198	0.037869	0.816318	0.034166
8.62168	0.387335	0.0462907	0.910646	0.0418034	0.813567	0.037103
8.65063	0.401969	0.0492821	0.913873	0.0329158	0.820876	0.0321327
8.66025	0.396121	0.0526259	0.912739	0.0392204	0.817657	0.0366199
8.66987	0.423439	0.087769	0.918777	0.0615379	0.830311	0.057675
8.67948	0.428393	0.089429	0.919704	0.0596826	0.832166	0.0571165
8.68907	0.426613	0.0875042	0.919297	0.0586078	0.831655	0.0572187
8.69866	0.418148	0.0820058	0.917204	0.0581808	0.829001	0.0576774
8.7178	0.399164	0.0566463	0.913632	0.0409769	0.819234	0.0391222
8.72735	0.383825	0.0465802	0.910245	0.0444299	0.812539	0.0399667
8.73689	0.385791	0.0433192	0.910966	0.0412107	0.812855	0.0346406
8.74643	0.38747	0.0550109	0.911363	0.0469562	0.81488	0.0443834
8.76546	0.386665	0.0503357	0.910711	0.0442606	0.814052	0.0409515
8.79394	0.391143	0.045175	0.911922	0.0379138	0.815493	0.0330189
8.80341	0.366625	0.0402981	0.908031	0.0557721	0.804204	0.0469361
8.81287	0.403765	0.0661137	0.91304	0.0485012	0.822337	0.0528896
8.82232	0.370605	0.0428236	0.907273	0.0543233	0.805983	0.046836
8.83176	0.407788	0.0667161	0.913878	0.0462217	0.824065	0.0514464
8.84119	0.370951	0.0419684	0.908072	0.0527124	0.805956	0.0445205
8.85061	0.385355	0.0444716	0.910252	0.0426332	0.812579	0.0363323
8.87881	0.369507	0.0383663	0.908841	0.0512295	0.805281	0.040994
8.88819	0.391299	0.0462569	0.911383	0.0385162	0.81564	0.0344034
8.89757	0.380364	0.0441636	0.909672	0.0446916	0.810503	0.0381204
8.91628	0.390155	0.0492674	0.910727	0.0403904	0.815136	0.038071
8.95358	0.394659	0.0561008	0.913131	0.0426096	0.816698	0.0381977
8.96289	0.387323	0.0614121	0.912775	0.0514151	0.814595	0.047693
8.98146	0.354752	0.0427504	0.906202	0.0660687	0.800174	0.0600367
8.99074	0.388828	0.0519322	0.911631	0.0457553	0.814663	0.0397297
9	0.366971	0.042236	0.907555	0.0538781	0.804975	0.0468359
9.0185	0.392609	0.0505856	0.910663	0.0424706	0.816359	0.0403393
9.02774	0.381102	0.0416701	0.909926	0.0430199	0.810649	0.0354344
9.03696	0.376227	0.0492909	0.908988	0.050069	0.809586	0.0451075
9.05539	0.358635	0.0392646	0.907297	0.0594771	0.800729	0.0504789
9.07377	0.361256	0.0400854	0.907251	0.0577461	0.801817	0.0489056
9.10128	0.401526	0.0656089	0.912756	0.0498133	0.821312	0.0532694
9.11043	0.368662	0.0429297	0.907297	0.0549521	0.80512	0.0474725
9.11958	0.380766	0.0429445	0.90852	0.0458541	0.810307	0.0378463
9.12871	0.368988	0.0420532	0.908056	0.0534461	0.805109	0.0452212
9.13783	0.383736	0.0439005	0.909459	0.0435219	0.81187	0.0366157
9.14695	0.364509	0.0375456	0.907786	0.0537637	0.803113	0.0428556
9.18332	0.382553	0.0466917	0.909598	0.0444786	0.811625	0.0394171
9.19239	0.343731	0.0450421	0.906018	0.0751296	0.796312	0.0705865
9.2105	0.345442	0.0441941	0.905581	0.0726132	0.796687	0.0674382
9.2376	0.422038	0.0905633	0.918788	0.066129	0.829058	0.0579801
9.24662	0.356688	0.0451666	0.906787	0.063073	0.800954	0.0570821
9.25563	0.370694	0.0381219	0.907612	0.0501044	0.805768	0.0382656
9.26463	0.350558	0.0420004	0.905551	0.0665797	0.797858	0.0595575
9.27362	0.381693	0.0462135	0.909994	0.0464951	0.811208	0.0383866
9.2826	0.387675	0.0491607	0.908968	0.0457719	0.813903	0.0423035
9.31844	0.359008	0.0412305	0.906934	0.059131	0.801193	0.0506283
9.35414	0.359416	0.0401128	0.907007	0.0586279	0.800966	0.0497122
9.38083	0.399258	0.0652143	0.912578	0.0511525	0.820253	0.0537925
9.39858	0.379316	0.0424317	0.907776	0.0469255	0.809575	0.0383131
9.40744	0.359707	0.0366235	0.906788	0.0571607	0.800957	0.0446233
9.42514	0.362861	0.0374254	0.907367	0.0548005	0.802317	0.043607
9.43398	0.336239	0.046902	0.904726	0.0805367	0.793749	0.076092
9.45163	0.337927	0.0456585	0.904663	0.0780483	0.793669	0.0725499
9.46044	0.392753	0.0568011	0.910218	0.048062	0.816647	0.0483726
9.46925	0.340473	0.0448522	0.904333	0.0756154	0.794808	0.0702962
9.50438	0.343027	0.0423524	0.904949	0.0717936	0.794482	0.0641684
9.5219	0.347823	0.0432766	0.904591	0.0695182	0.797532	0.063433
9.53065	0.369262	0.0377743	0.907078	0.0512258	0.805086	0.0387033
9.53939	0.348769	0.0420794	0.905251	0.067629	0.797087	0.060462
9.55685	0.38603	0.0486687	0.90832	0.046811	0.813081	0.0429802
9.57427	0.348678	0.0385867	0.905555	0.065953	0.796317	0.0549935
9.59166	0.351839	0.0389671	0.906108	0.0635253	0.797612	0.0534788
9.66954	0.338584	0.0457592	0.904345	0.076859	0.794753	0.070479
9.67815	0.358126	0.0364422	0.906416	0.0584369	0.800204	0.0451814
9.68676	0.331386	0.0480541	0.903443	0.0839692	0.791984	0.0790807
9.70395	0.333044	0.0465328	0.903646	0.0818589	0.791705	0.0754633
9.73824	0.338771	0.0450182	0.903892	0.0767833	0.794159	0.0712421
9.75534	0.338191	0.0426206	0.904181	0.0759063	0.792499	0.0668204
9.77241	0.341338	0.0424007	0.904612	0.0732015	0.793776	0.0650658
9.79796	0.367841	0.0373762	0.90653	0.0523712	0.804408	0.03913
9.84039	0.347046	0.0384862	0.905113	0.0674228	0.795632	0.055659
9.89949	0.32124	0.052592	0.902519	0.0940805	0.789137	0.0879205
9.91632	0.323876	0.0509601	0.902577	0.091136	0.789475	0.0847982
9.9415	0.356526	0.0362116	0.906035	0.0597164	0.799422	0.0456562
9.94987	0.328693	0.0478758	0.902972	0.0860421	0.790354	0.0788205
9.96661	0.331407	0.0467566	0.903284	0.0832757	0.791112	0.076423
10.0167	0.336549	0.0426796	0.903887	0.0775579	0.791943	0.0676029
10.0995	0.345391	0.0383474	0.904655	0.0689164	0.795007	0.05625
10.1407	0.316273	0.0549205	0.901311	0.0987486	0.787529	0.0912112
10.1571	0.318914	0.0529685	0.90172	0.096348	0.787773	0.0878429
10.1735	0.322239	0.0515128	0.902145	0.0925518	0.788918	0.0857047
10.2062	0.326524	0.0479875	0.902812	0.0882104	0.789259	0.0790515
10.2713	0.334887	0.042784	0.90365	0.0792846	0.79141	0.0683124
10.3763	0.311202	0.0577138	0.899991	0.104176	0.785959	0.0950785
10.3923	0.314531	0.0557668	0.900753	0.100372	0.786927	0.0922137
10.4083	0.317218	0.053683	0.901348	0.098229	0.787147	0.0887883
10.4563	0.324876	0.0484529	0.902763	0.0900877	0.788655	0.0797813
10.6066	0.305995	0.0611575	0.898361	0.109538	0.784217	0.100076
10.6223	0.309408	0.058738	0.899367	0.106176	0.785266	0.0963793
10.6536	0.315513	0.0544843	0.901039	0.100411	0.78642	0.0897638
10.8474	0.304137	0.0624466	0.897718	0.111521	0.783455	0.101904
10.8628	0.307644	0.0598538	0.898758	0.108405	0.784488	0.0978129
11.083	0.302294	0.0638477	0.897127	0.113486	0.782662	0.103999
11.3137	0.300459	0.0653185	0.896645	0.115246	0.781934	0.106439
Fig. 8e	pyCaprin1 cross-correlations with ATP-Mg, Na and Cl
r/b	ATP-Mg (Avg)	ATP-Mg (Std)	Na (Avg)	Na (Std)	Cl (Avg)	Cl (Std)
0	15.8096	0.743184	6.49377	0.38067	2.95504	0.105882
0.408248	14.4929	0.680046	5.91086	0.35126	2.70757	0.0942565
0.57735	13.6138	0.631226	5.56141	0.333327	2.55678	0.0872507
0.707107	12.9252	0.575066	5.31709	0.320488	2.45387	0.082402
0.816497	12.3611	0.597951	5.12677	0.311543	2.3775	0.0786211
0.912871	11.8524	0.546681	4.9622	0.302383	2.31373	0.0751097
1	11.387	0.510945	4.81491	0.294295	2.25903	0.0721544
1.1547	10.5484	0.466584	4.55373	0.280182	2.16469	0.0676439
1.22474	10.1624	0.445687	4.4348	0.274154	2.12391	0.0660581
1.29099	9.80541	0.430383	4.32264	0.26967	2.08427	0.0652677
1.35401	9.45307	0.407903	4.21531	0.263756	2.04781	0.0631212
1.41421	9.1095	0.38592	4.11297	0.25649	2.01441	0.0612475
1.47196	8.80776	0.371928	4.01543	0.252545	1.98038	0.0606145
1.52753	8.50408	0.357132	3.92215	0.24703	1.9497	0.0595685
1.63299	7.96244	0.333526	3.74966	0.239692	1.89345	0.0595504
1.68325	7.69285	0.320135	3.66583	0.233756	1.86539	0.0578062
1.73205	7.44723	0.308121	3.58677	0.230092	1.83972	0.0575068
1.77951	7.19945	0.298616	3.50861	0.224377	1.81389	0.0572477
1.82574	6.98501	0.287635	3.43674	0.222293	1.79155	0.0568972
1.87083	6.76473	0.279837	3.36566	0.217331	1.76829	0.0566575
1.91485	6.54639	0.27424	3.29531	0.211446	1.7442	0.0560782
2	6.16263	0.258326	3.16621	0.20481	1.70352	0.0562565
2.04124	5.98249	0.249835	3.10505	0.203505	1.68535	0.0569104
2.08167	5.809	0.244198	3.04577	0.199437	1.66603	0.0565927
2.12132	5.64609	0.239055	2.9891	0.195903	1.64872	0.0556714
2.19848	5.31871	0.227957	2.87617	0.188273	1.61078	0.0565006
2.23607	5.17873	0.222171	2.82528	0.18696	1.59684	0.0567403
2.3094	4.8822	0.213597	2.72165	0.180991	1.56182	0.0583058
2.34521	4.75226	0.209258	2.67443	0.176978	1.54653	0.0574975
2.38048	4.62115	0.20489	2.62715	0.172845	1.53069	0.0569662
2.41523	4.50234	0.200182	2.58317	0.172376	1.51785	0.0580288
2.44949	4.37916	0.19917	2.53899	0.167363	1.5022	0.0567446
2.48328	4.28851	0.203626	2.50391	0.169294	1.49748	0.0573015
2.51661	4.16044	0.193337	2.45643	0.16354	1.47757	0.0573464
2.58199	3.96336	0.191454	2.38019	0.161044	1.45657	0.0583609
2.61406	3.85048	0.184142	2.33847	0.155876	1.4394	0.0573623
2.64575	3.74618	0.178533	2.30021	0.153918	1.42502	0.0583779
2.67706	3.64902	0.176759	2.2616	0.147112	1.41108	0.0570982
2.70801	3.5783	0.179217	2.2317	0.150619	1.40645	0.0582611
2.73861	3.47969	0.172469	2.19512	0.14581	1.3911	0.0579475
2.76887	3.4057	0.1728	2.16456	0.146754	1.38442	0.0586393
2.82843	3.22576	0.165262	2.09296	0.131712	1.35396	0.0549825
2.85774	3.16953	0.168442	2.0696	0.139297	1.35294	0.0578462
2.88675	3.09124	0.165325	2.03914	0.134057	1.34088	0.0562923
2.91548	3.02863	0.167833	2.01497	0.136706	1.33557	0.0576555
2.94392	2.95437	0.158389	1.98457	0.134271	1.32433	0.0581377
2.97209	2.89278	0.161204	1.95797	0.132972	1.31683	0.0579406
3	2.82861	0.161209	1.93018	0.129151	1.30724	0.0569414
3.05505	2.69746	0.150835	1.87581	0.122732	1.28653	0.0566283
3.08221	2.64494	0.153663	1.85097	0.119502	1.27922	0.0550264
3.10913	2.59936	0.158875	1.83258	0.126501	1.27783	0.0576484
3.13581	2.53632	0.151032	1.80566	0.119556	1.26603	0.0554482
3.18852	2.424	0.142069	1.75862	0.111429	1.24767	0.0544721
3.21455	2.38109	0.144692	1.74064	0.114903	1.24438	0.0556117
3.26599	2.31424	0.173966	1.70814	0.125982	1.23977	0.058491
3.2914	2.24436	0.143506	1.68025	0.11123	1.22442	0.0545429
3.31662	2.20251	0.143066	1.65914	0.108901	1.21793	0.053382
3.34166	2.15746	0.141734	1.63721	0.105657	1.21008	0.0545899
3.3665	2.12028	0.143402	1.62058	0.104667	1.2049	0.0528031
3.39116	2.08374	0.146135	1.60534	0.108762	1.20187	0.0545477
3.41565	2.02697	0.126396	1.58014	0.0934135	1.18682	0.0510891
3.4641	1.97029	0.14209	1.55513	0.104177	1.18553	0.0534105
3.48807	1.92934	0.133059	1.53816	0.100646	1.17886	0.0518471
3.51188	1.89512	0.133255	1.5192	0.0980481	1.17163	0.0514635
3.53553	1.85519	0.120899	1.50385	0.092042	1.16541	0.0488829
3.55903	1.81808	0.115623	1.4882	0.0881016	1.15816	0.0493403
3.58236	1.79658	0.125864	1.46986	0.088734	1.15324	0.0489108
3.60555	1.75929	0.116699	1.45833	0.0879329	1.14915	0.0490126
3.65148	1.711	0.128969	1.43281	0.0946841	1.14469	0.0491546
3.67423	1.6785	0.121097	1.41629	0.0866985	1.13614	0.0479175
3.69685	1.66571	0.142064	1.40748	0.0973403	1.13584	0.0540757
3.71932	1.6278	0.123086	1.39102	0.0857357	1.12735	0.0488539
3.74166	1.60128	0.122236	1.37896	0.0868973	1.12464	0.0483953
3.76386	1.58032	0.126892	1.37151	0.0889958	1.12478	0.0492104
3.78594	1.55363	0.117961	1.35593	0.0824614	1.11781	0.0466857
3.82971	1.49745	0.0998913	1.32473	0.0670485	1.10161	0.042532
3.85141	1.48083	0.111974	1.32078	0.0780899	1.10472	0.0453994
3.87298	1.45822	0.10856	1.3082	0.075223	1.10014	0.0434295
3.89444	1.44817	0.130371	1.30071	0.0893137	1.10029	0.05038
3.937	1.39429	0.103188	1.27873	0.0728345	1.08996	0.0428949
3.95811	1.3789	0.106816	1.26754	0.0727765	1.08595	0.0436269
4	1.33823	0.101569	1.2454	0.0662908	1.07707	0.0420106
4.02078	1.32262	0.0979071	1.2366	0.065782	1.07595	0.0394722
4.04145	1.30463	0.102678	1.23111	0.0697685	1.07461	0.04157
4.06202	1.28695	0.0955104	1.22095	0.0631014	1.07138	0.0390963
4.08248	1.27197	0.103418	1.2173	0.069323	1.07264	0.0416513
4.10284	1.25564	0.0982283	1.20501	0.0656357	1.06568	0.0403369
4.12311	1.24413	0.107342	1.19911	0.0715389	1.06507	0.044827
4.16333	1.21019	0.0981907	1.18245	0.066179	1.05904	0.0410439
4.1833	1.19897	0.102089	1.17158	0.0674645	1.05459	0.0427234
4.20317	1.18055	0.0988718	1.16573	0.0644592	1.05244	0.0403262
4.22295	1.16373	0.0875497	1.15901	0.0586703	1.05029	0.0358013
4.24264	1.16051	0.103742	1.14882	0.0681314	1.04836	0.0434243
4.26224	1.13922	0.0866234	1.14341	0.0584007	1.04405	0.0368414
4.28174	1.12778	0.0879875	1.13513	0.0576712	1.04188	0.0363074
4.33974	1.09282	0.0947446	1.11741	0.0607982	1.03794	0.0392397
4.3589	1.07563	0.0717789	1.11044	0.0450656	1.03504	0.0294306
4.37798	1.06493	0.0813613	1.104	0.0520286	1.02972	0.0346762
4.39697	1.05467	0.0739968	1.09651	0.0487739	1.02771	0.0312936
4.41588	1.04454	0.0825321	1.09439	0.0536109	1.02982	0.0336598
4.43471	1.03486	0.0854425	1.08808	0.0539983	1.02806	0.0344923
4.47214	1.01704	0.0919141	1.07529	0.0599514	1.02171	0.039866
4.49073	1.00348	0.0686715	1.06909	0.0420927	1.01999	0.0280151
4.50925	0.994123	0.071342	1.06345	0.0460092	1.01655	0.0319678
4.52769	0.988207	0.0763535	1.05575	0.0494491	1.01446	0.0350134
4.56435	0.968652	0.0741067	1.04742	0.0474359	1.01212	0.0324208
4.58258	0.95988	0.079938	1.04436	0.0535297	1.01103	0.0357812
4.6188	0.943348	0.0726591	1.03982	0.0410495	1.01705	0.0268748
4.63681	0.934291	0.0669302	1.02997	0.0420093	1.00679	0.0284844
4.65475	0.927264	0.0792765	1.02707	0.0521624	1.00787	0.0334739
4.67262	0.919108	0.0719879	1.02149	0.0463549	1.00498	0.0309816
4.69042	0.910724	0.06549	1.01772	0.038272	1.00343	0.0275681
4.70815	0.902664	0.0520649	1.01115	0.031945	0.998854	0.0234167
4.72582	0.897203	0.0648395	1.00765	0.0400604	0.999439	0.0283919
4.76095	0.8834	0.0530569	0.999577	0.0295626	0.998552	0.019971
4.77842	0.87494	0.0628013	0.998	0.0403843	0.996465	0.0263538
4.79583	0.870115	0.0552697	0.990818	0.0352866	0.992884	0.0248931
4.81318	0.863547	0.0568585	0.988584	0.035313	0.992524	0.025567
4.83046	0.855383	0.0596336	0.987325	0.0365927	0.992176	0.024929
4.84768	0.851202	0.0642137	0.980848	0.0414643	0.988907	0.0310225
4.86484	0.845709	0.0439427	0.975811	0.0246119	0.988722	0.019569
4.89898	0.832362	0.0437772	0.968288	0.0279592	0.98406	0.0220902
4.91596	0.826014	0.0603271	0.967769	0.0384642	0.984881	0.0275841
4.93288	0.822165	0.0570199	0.96461	0.0359302	0.984374	0.0257203
4.94975	0.816711	0.0562827	0.96288	0.0376722	0.983512	0.0266431
4.96655	0.806697	0.0825986	0.952452	0.0624589	0.974004	0.0491101
4.98331	0.807204	0.0489102	0.953848	0.0298937	0.981847	0.0216533
5	0.801269	0.0538265	0.953829	0.0326038	0.981459	0.0227569
5.03322	0.791654	0.0490284	0.944353	0.033598	0.976047	0.0261791
5.04975	0.787935	0.0441044	0.942658	0.0270941	0.977315	0.0204853
5.06623	0.78147	0.051165	0.939136	0.0359947	0.974765	0.0263324
5.08265	0.780196	0.0403287	0.937287	0.0233098	0.975149	0.0192154
5.11534	0.768155	0.0603854	0.93049	0.0446835	0.971059	0.033225
5.1316	0.765167	0.0446875	0.932289	0.0275861	0.974054	0.018725
5.16398	0.753035	0.0580575	0.924717	0.047981	0.966937	0.0350666
5.18009	0.754165	0.0389077	0.922739	0.0257195	0.970112	0.0195312
5.19615	0.752948	0.0411664	0.919031	0.0240822	0.970522	0.0204425
5.21217	0.747555	0.050915	0.921778	0.0266985	0.975132	0.0187097
5.22813	0.744416	0.041888	0.914951	0.0266265	0.968852	0.0198719
5.24404	0.740684	0.0382539	0.91511	0.0217882	0.970341	0.0158192
5.25991	0.739258	0.0332055	0.911655	0.0181605	0.968923	0.0154459
5.2915	0.730237	0.0410536	0.909538	0.0236567	0.968701	0.0157536
5.30723	0.723363	0.0502475	0.903249	0.0385399	0.960379	0.0304917
5.32291	0.721188	0.0369555	0.901715	0.0275417	0.961172	0.0208913
5.33854	0.71729	0.040685	0.899694	0.0278737	0.961323	0.0196794
5.35413	0.722111	0.0294934	0.898183	0.0185424	0.966299	0.018083
5.36967	0.712624	0.0378392	0.896526	0.0268366	0.959783	0.0205568
5.38516	0.708494	0.0357993	0.892714	0.0278074	0.95748	0.0219317
5.41603	0.705144	0.0421472	0.889427	0.0301647	0.957917	0.0254218
5.43139	0.705325	0.0270767	0.884747	0.0232793	0.957463	0.0248715
5.44671	0.698751	0.0363574	0.885994	0.0282044	0.955968	0.0225518
5.46199	0.696692	0.0314185	0.88407	0.0258857	0.95605	0.021346
5.47723	0.697199	0.0280307	0.885757	0.0191891	0.959849	0.014485
5.49242	0.69557	0.0279228	0.884459	0.0175237	0.960769	0.0132658
5.50757	0.688877	0.0357003	0.879846	0.0249762	0.956139	0.0180462
5.53775	0.683479	0.0352333	0.880795	0.0256484	0.955371	0.0171825
5.55278	0.684452	0.0293667	0.876505	0.0199394	0.956959	0.0148841
5.56776	0.679147	0.0320226	0.87519	0.0245864	0.954239	0.0161795
5.58271	0.681205	0.0267426	0.870089	0.0221339	0.952974	0.0194943
5.61249	0.674955	0.0284009	0.870625	0.0211584	0.95343	0.015281
5.62731	0.67553	0.0302928	0.869938	0.0213144	0.956601	0.0161006
5.65685	0.684443	0.0404813	0.866161	0.027296	0.963407	0.0274442
5.67157	0.66791	0.0256952	0.866709	0.0180259	0.954416	0.0127504
5.68624	0.666514	0.0244064	0.864192	0.0190214	0.952673	0.0146236
5.70088	0.663635	0.0253871	0.86348	0.0207438	0.950721	0.0160384
5.71548	0.660377	0.0296087	0.860116	0.0223918	0.947213	0.0181709
5.73004	0.657712	0.0285164	0.857948	0.0242456	0.946111	0.0175995
5.74456	0.657924	0.0232032	0.856095	0.0238108	0.945809	0.0219092
5.7735	0.656046	0.0204817	0.852952	0.0237268	0.946743	0.0222836
5.78792	0.649397	0.0315738	0.851308	0.0281141	0.942625	0.0212825
5.8023	0.650549	0.0291248	0.855744	0.0211419	0.950489	0.0123284
5.81664	0.647275	0.0301847	0.853177	0.0227477	0.948306	0.0130733
5.83095	0.643049	0.0348882	0.847397	0.0312576	0.940752	0.0219686
5.84523	0.645628	0.0277653	0.850157	0.0246094	0.943831	0.0188499
5.85947	0.6463	0.0224531	0.849069	0.0215346	0.946794	0.0163287
5.88784	0.63861	0.0289771	0.849674	0.0237967	0.947656	0.0137751
5.90198	0.64091	0.023131	0.846806	0.0215893	0.945609	0.0146466
5.91608	0.643907	0.024593	0.845105	0.0190661	0.947086	0.0154426
5.93015	0.644628	0.0247537	0.845255	0.0237398	0.951686	0.0193076
5.94418	0.634332	0.0270398	0.844168	0.0254083	0.943082	0.0149094
5.95819	0.639598	0.0172984	0.841422	0.0224813	0.945198	0.0224028
5.97216	0.632979	0.0286695	0.841546	0.0268295	0.940337	0.0176674
6	0.632964	0.0258154	0.838548	0.0237043	0.941648	0.0172322
6.01387	0.63815	0.0246693	0.840223	0.0231448	0.949432	0.0186254
6.02771	0.634112	0.0244534	0.839802	0.0207175	0.947119	0.0153868
6.04152	0.630506	0.0213468	0.83995	0.0182123	0.945523	0.0125256
6.06905	0.628142	0.0223933	0.835361	0.021299	0.942723	0.0144598
6.08276	0.622784	0.0248057	0.836971	0.0238326	0.942605	0.0139658
6.1101	0.62894	0.0272469	0.83455	0.0220061	0.946395	0.0162322
6.12372	0.621625	0.0227309	0.832122	0.0227668	0.941496	0.0134874
6.13732	0.619963	0.0183711	0.828824	0.0253764	0.93733	0.0191464
6.15088	0.623849	0.0243561	0.830243	0.0243463	0.938149	0.0186728
6.16441	0.625981	0.0212666	0.829545	0.0212153	0.943832	0.0198979
6.17792	0.620092	0.0225243	0.828154	0.0233246	0.938342	0.0163443
6.19139	0.62053	0.0215475	0.827451	0.0236837	0.937769	0.0188739
6.21825	0.613603	0.0226105	0.833118	0.0280855	0.940869	0.018797
6.23164	0.615743	0.0218325	0.828496	0.0239215	0.938525	0.0157119
6.245	0.617618	0.0214199	0.827115	0.0217693	0.941588	0.0151242
6.25833	0.608667	0.0515535	0.820865	0.0494697	0.921309	0.0410377
6.27163	0.616877	0.0206692	0.828231	0.0201747	0.941954	0.0139163
6.2849	0.614934	0.0251248	0.825223	0.0211812	0.940106	0.0126865
6.29815	0.616001	0.0236144	0.822351	0.027378	0.936441	0.0239946
6.33772	0.613293	0.0251525	0.823069	0.0220811	0.938397	0.0138264
6.35085	0.610444	0.0233643	0.822215	0.0240377	0.937434	0.0156307
6.36396	0.610896	0.0225181	0.820462	0.0223659	0.938478	0.0140898
6.37704	0.613	0.0254715	0.819897	0.0256504	0.944394	0.0177018
6.3901	0.607511	0.0174501	0.8203	0.0223665	0.939967	0.0160704
6.40312	0.60929	0.023492	0.821143	0.0219041	0.940927	0.01417
6.4291	0.606109	0.025943	0.818047	0.0218559	0.937936	0.0127056
6.44205	0.610939	0.0262531	0.820538	0.0230907	0.94292	0.0172814
6.45497	0.606116	0.0223014	0.818077	0.0242097	0.936625	0.0147502
6.46787	0.605489	0.0201904	0.817929	0.0227713	0.940425	0.0156307
6.49359	0.604142	0.0283578	0.814025	0.0277157	0.940736	0.0195931
6.50641	0.604673	0.0256156	0.817656	0.0221094	0.936851	0.0126045
6.53197	0.599081	0.0857432	0.810123	0.0625916	0.899206	0.0584041
6.54472	0.609555	0.0262137	0.814752	0.0250935	0.938682	0.0201473
6.55744	0.607705	0.0262013	0.813527	0.0256861	0.936259	0.0178758
6.57013	0.601748	0.0262401	0.814684	0.0233219	0.934541	0.0125655
6.58281	0.601097	0.0221032	0.813454	0.0246945	0.935756	0.0163424
6.59545	0.602476	0.0230317	0.815452	0.0230084	0.935824	0.0148433
6.60808	0.600752	0.0211677	0.816664	0.0215028	0.940134	0.0177744
6.63325	0.600076	0.0228856	0.814271	0.0230571	0.936569	0.0158593
6.6458	0.594928	0.0223537	0.813373	0.026375	0.932088	0.0164366
6.65833	0.600534	0.0232226	0.810563	0.0232631	0.936462	0.0155386
6.67083	0.607817	0.0348742	0.810544	0.0312622	0.942769	0.0225782
6.68331	0.605445	0.0328794	0.810541	0.0240709	0.935191	0.0172464
6.69577	0.599561	0.0263142	0.80949	0.0247076	0.937353	0.0149816
6.7082	0.599484	0.0274891	0.809867	0.0234555	0.937815	0.0148103
6.733	0.604871	0.0276356	0.811511	0.0268917	0.94077	0.0250825
6.74537	0.592577	0.0222801	0.809052	0.0256967	0.932264	0.0162131
6.75771	0.598705	0.0265447	0.809004	0.0253085	0.939658	0.0170039
6.77003	0.598161	0.0265277	0.811328	0.0223553	0.936913	0.0139123
6.78233	0.60031	0.0286619	0.810826	0.0243482	0.933535	0.0130072
6.79461	0.594117	0.0274307	0.809362	0.0228898	0.932581	0.0143426
6.80686	0.592397	0.0281011	0.808357	0.025861	0.936483	0.0174895
6.8313	0.604904	0.0434326	0.80618	0.0371093	0.945689	0.0262917
6.84349	0.596953	0.0283706	0.806879	0.0249065	0.936374	0.0150168
6.85565	0.603122	0.0276025	0.810028	0.0241545	0.939666	0.0187969
6.8678	0.59755	0.0314077	0.808382	0.0239939	0.937777	0.0169829
6.89202	0.600305	0.0341491	0.80556	0.027807	0.939452	0.0190102
6.90411	0.598881	0.0326053	0.805584	0.0251043	0.936437	0.0149477
6.9282	0.587677	0.0230991	0.804059	0.0244728	0.92873	0.015457
6.94022	0.592581	0.0346609	0.803932	0.0287529	0.939914	0.0192734
6.95222	0.591946	0.027912	0.805529	0.0243147	0.934447	0.0148012
6.96419	0.586612	0.0353029	0.799236	0.0309688	0.935979	0.0192515
6.97615	0.585827	0.0259999	0.803319	0.0259372	0.93274	0.0180466
6.98809	0.595129	0.0310387	0.806209	0.0251949	0.937998	0.0159634
7	0.594086	0.0355976	0.800144	0.0291054	0.936985	0.017857
7.02377	0.593838	0.0303145	0.804362	0.0237474	0.935279	0.0138843
7.03562	0.590425	0.0306353	0.801708	0.0250395	0.933436	0.014868
7.04746	0.592288	0.0344075	0.805923	0.0254029	0.932906	0.0164386
7.05927	0.596844	0.0357058	0.800808	0.027721	0.937141	0.0170476
7.07107	0.583555	0.0363142	0.798694	0.0318647	0.933529	0.0208295
7.08284	0.597462	0.0371987	0.803214	0.0294756	0.939411	0.018465
7.0946	0.599622	0.0518073	0.799603	0.0386079	0.941596	0.0265806
7.11805	0.592606	0.040144	0.795519	0.035026	0.937178	0.0233304
7.12975	0.59465	0.0357451	0.800974	0.0277905	0.936717	0.0171083
7.14143	0.591901	0.0363177	0.801364	0.028611	0.937659	0.0181844
7.15309	0.577899	0.0337107	0.802615	0.032709	0.93073	0.0258773
7.16473	0.598892	0.0456454	0.801689	0.0339118	0.940485	0.024741
7.17635	0.598293	0.0352543	0.804042	0.0250434	0.938119	0.0159025
7.18795	0.590524	0.0365221	0.80144	0.0257397	0.931781	0.0158396
7.2111	0.594247	0.0405506	0.797085	0.0313067	0.936376	0.0212325
7.22265	0.593098	0.0399146	0.79571	0.0315653	0.936798	0.017754
7.23418	0.593276	0.039561	0.797852	0.030215	0.936937	0.0183495
7.24569	0.592453	0.0400094	0.79781	0.0318655	0.936426	0.0200832
7.26865	0.580329	0.0354967	0.794038	0.0289737	0.927795	0.0184236
7.28011	0.587323	0.0418308	0.79456	0.0326549	0.936188	0.0187408
7.30297	0.580551	0.0299074	0.80831	0.028595	0.932209	0.022735
7.31437	0.58927	0.0377584	0.79714	0.0293753	0.93437	0.0176054
7.32575	0.58948	0.0392669	0.794242	0.030804	0.932574	0.0197091
7.33712	0.599679	0.0573145	0.796674	0.0401252	0.938819	0.0284048
7.34847	0.594428	0.041092	0.799698	0.0307651	0.938851	0.0180778
7.3598	0.594486	0.0488036	0.796204	0.0347892	0.937569	0.0215715
7.37111	0.589762	0.0426975	0.794652	0.0325994	0.936466	0.0191466
7.39369	0.596349	0.0386326	0.801456	0.024207	0.929028	0.0183618
7.40495	0.588969	0.0444109	0.79486	0.0343248	0.93539	0.0204108
7.4162	0.596934	0.0374541	0.80146	0.0243586	0.930532	0.0168525
7.42743	0.600298	0.0475345	0.796189	0.0336462	0.939077	0.0209515
7.43864	0.602055	0.0502977	0.79515	0.0356092	0.941801	0.0208698
7.44983	0.596421	0.0545395	0.793172	0.0378449	0.940249	0.0233688
7.46101	0.584406	0.0421002	0.794121	0.0325574	0.931374	0.0242603
7.48331	0.595232	0.0374901	0.800657	0.0256873	0.931967	0.0148684
7.49444	0.59057	0.0520836	0.796328	0.0385145	0.938217	0.0216617
7.50555	0.591367	0.0428436	0.794118	0.0316653	0.935099	0.0168022
7.51665	0.590234	0.0538593	0.790178	0.0390258	0.936004	0.0213671
7.52773	0.56638	0.0436603	0.784288	0.0380933	0.921358	0.0246072
7.53879	0.588294	0.0413608	0.793244	0.0293956	0.932761	0.0169382
7.54983	0.595158	0.0509256	0.791176	0.0360546	0.935688	0.020497
7.57188	0.582164	0.0508028	0.786295	0.0381616	0.930138	0.0217011
7.58288	0.601852	0.049541	0.795588	0.0337728	0.940127	0.0204412
7.59386	0.588695	0.056888	0.79241	0.0397539	0.935412	0.0231779
7.60482	0.5735	0.0436753	0.787203	0.0375003	0.926462	0.0251203
7.62671	0.589204	0.0528352	0.788222	0.0396994	0.934507	0.0224626
7.63763	0.591821	0.0518516	0.790903	0.0365078	0.935937	0.021625
7.65942	0.600532	0.0897692	0.791983	0.0559957	0.942486	0.0354509
7.67029	0.600099	0.0506829	0.793792	0.0346998	0.939367	0.0191842
7.68115	0.597683	0.0639519	0.791053	0.0429828	0.938941	0.0251847
7.69199	0.592749	0.0474066	0.791167	0.0312025	0.935285	0.0175944
7.70281	0.589253	0.0442918	0.790601	0.0326836	0.932146	0.0188594
7.71362	0.571946	0.0413373	0.79411	0.0372818	0.928275	0.0291074
7.72442	0.601798	0.0736924	0.793041	0.0465882	0.945077	0.0315214
7.74597	0.594135	0.0567025	0.792744	0.0370784	0.939637	0.0222503
7.75672	0.603415	0.0529322	0.792705	0.0350766	0.93965	0.0191951
7.76745	0.596768	0.0558879	0.790889	0.0387102	0.9369	0.0223577
7.77817	0.595034	0.0719136	0.786953	0.0486046	0.936559	0.0280553
7.79957	0.589864	0.0624892	0.786464	0.0436823	0.932858	0.0256256
7.81025	0.58476	0.051152	0.784172	0.0380751	0.930274	0.0197081
7.84219	0.585335	0.0540964	0.785058	0.0388506	0.929838	0.0210687
7.85281	0.584998	0.048679	0.787207	0.032201	0.932535	0.0168819
7.86342	0.600889	0.0738233	0.789284	0.0481225	0.939238	0.0293919
7.87401	0.59359	0.0456638	0.792642	0.031966	0.933415	0.0218111
7.88458	0.582508	0.0447232	0.785555	0.0329608	0.927467	0.0191634
7.89515	0.592559	0.0553116	0.786652	0.0382973	0.934562	0.0201149
7.91623	0.599991	0.0701531	0.788569	0.0462884	0.939812	0.0251691
7.92675	0.599116	0.0847521	0.789788	0.0522805	0.941526	0.0322185
7.93725	0.576371	0.0471903	0.78385	0.0383219	0.926258	0.0260701
7.96869	0.592362	0.0579666	0.787181	0.0402223	0.934804	0.0227324
7.97914	0.603165	0.0628076	0.789822	0.04109	0.940061	0.02228
8	0.601905	0.0573801	0.795206	0.0341718	0.940588	0.020213
8.01041	0.588533	0.053324	0.783694	0.0397355	0.930335	0.024917
8.02081	0.596586	0.0675271	0.788108	0.0448843	0.934787	0.0276103
8.03119	0.602142	0.0821923	0.790475	0.0492875	0.942844	0.0292879
8.04156	0.604926	0.125519	0.784692	0.0781375	0.936816	0.0532522
8.05191	0.603537	0.0800766	0.790153	0.0482192	0.943734	0.0282639
8.06226	0.599174	0.0881723	0.785226	0.0574609	0.936737	0.0349484
8.0829	0.58915	0.0471076	0.784979	0.0335172	0.929536	0.0170066
8.09321	0.577326	0.0472293	0.779149	0.0378246	0.922399	0.0227263
8.1035	0.59286	0.0717589	0.783587	0.0488487	0.933275	0.0278708
8.11377	0.584512	0.0530787	0.781429	0.0388933	0.929484	0.0201416
8.12404	0.586564	0.0649794	0.780015	0.0462203	0.929171	0.0272928
8.14453	0.587885	0.0659142	0.781045	0.0457993	0.930211	0.0266623
8.16497	0.564223	0.0489179	0.779798	0.0411073	0.921075	0.0253465
8.17517	0.588299	0.0580894	0.784299	0.0406903	0.932295	0.0207671
8.18535	0.601917	0.0776235	0.788355	0.0497684	0.938226	0.0292393
8.19553	0.577657	0.0501802	0.776744	0.0413766	0.921441	0.0242403
8.20569	0.593886	0.0765297	0.785428	0.0497366	0.936355	0.0284182
8.21584	0.602122	0.0684847	0.788602	0.0434974	0.940207	0.0234058
8.22598	0.603977	0.0939582	0.789905	0.055023	0.945188	0.036275
8.24621	0.58269	0.057301	0.778606	0.0453847	0.925938	0.0248989
8.25631	0.595201	0.0843445	0.781321	0.0584361	0.929885	0.037264
8.2664	0.595175	0.0699794	0.784364	0.0458569	0.936103	0.0250259
8.27647	0.610413	0.138606	0.78262	0.0887245	0.936291	0.061151
8.29659	0.607764	0.108944	0.785421	0.0687646	0.937977	0.0449514
8.30662	0.601786	0.0951011	0.787247	0.0579056	0.940801	0.0341966
8.32666	0.589404	0.0540425	0.782668	0.0406003	0.929499	0.0256279
8.33667	0.602726	0.10371	0.784434	0.0658755	0.93781	0.0418045
8.34666	0.603664	0.085263	0.788707	0.0511202	0.94299	0.0297044
8.35663	0.598051	0.0824668	0.783664	0.0549169	0.935572	0.0309141
8.3666	0.604253	0.0780012	0.79113	0.0449345	0.945143	0.0282896
8.37655	0.590852	0.0849513	0.779449	0.0571269	0.9307	0.0355626
8.3865	0.561018	0.0497408	0.765972	0.0429294	0.90925	0.0225619
8.41625	0.581483	0.0545678	0.776247	0.0423893	0.924256	0.0230818
8.42615	0.584101	0.0535642	0.780539	0.0392094	0.929134	0.0207196
8.43603	0.605452	0.111963	0.787781	0.0664387	0.944009	0.0437661
8.44591	0.596955	0.0833564	0.784879	0.0544293	0.936991	0.0309392
8.45577	0.593323	0.0840249	0.782209	0.055427	0.93387	0.0322102
8.46562	0.586454	0.0617334	0.77831	0.0466148	0.927749	0.0242313
8.48528	0.617394	0.162502	0.780365	0.104512	0.933336	0.0722554
8.4951	0.605096	0.106568	0.787689	0.0635339	0.943724	0.0392877
8.5049	0.603561	0.111099	0.779142	0.0751825	0.930142	0.0490018
8.52447	0.601124	0.0723043	0.786641	0.0476629	0.938779	0.0257157
8.53424	0.590146	0.0660704	0.780519	0.045248	0.930743	0.0241077
8.544	0.613941	0.147953	0.782558	0.0932048	0.937814	0.0630289
8.56349	0.612254	0.144159	0.783409	0.0902339	0.939304	0.0604824
8.57321	0.597246	0.0800393	0.78429	0.0517424	0.937454	0.0291921
8.59263	0.601369	0.0969036	0.786253	0.0601813	0.941442	0.0361787
8.62168	0.602474	0.108725	0.783694	0.0689524	0.937726	0.0429222
8.65063	0.603872	0.0876954	0.78761	0.0539679	0.942817	0.0315169
8.66025	0.59603	0.090706	0.781531	0.0599758	0.933859	0.0361035
8.66987	0.558811	0.051193	0.760772	0.0442398	0.904486	0.0225451
8.67948	0.558143	0.0506189	0.764255	0.0439604	0.907357	0.0225736
8.68907	0.560473	0.050063	0.764203	0.0434578	0.908104	0.0220472
8.69866	0.564236	0.05008	0.76221	0.0425269	0.908072	0.0223148
8.7178	0.589425	0.079625	0.777825	0.0549174	0.929998	0.0325134
8.72735	0.605227	0.109038	0.782311	0.0724359	0.935454	0.0455208
8.73689	0.604552	0.115874	0.786618	0.0702406	0.942994	0.0443387
8.74643	0.596907	0.0977609	0.773734	0.0685888	0.924097	0.0436903
8.76546	0.602758	0.105462	0.779144	0.0719906	0.931523	0.0452215
8.79394	0.605187	0.107258	0.787537	0.064617	0.943519	0.0402842
8.80341	0.614123	0.158048	0.782283	0.0998901	0.938502	0.0663981
8.81287	0.581862	0.0615805	0.772328	0.0485215	0.920143	0.0261283
8.82232	0.613478	0.15069	0.783615	0.0966849	0.938783	0.0644942
8.83176	0.583145	0.058559	0.774819	0.0467925	0.922637	0.0257495
8.84119	0.61148	0.148986	0.784342	0.0939643	0.939901	0.0623141
8.85061	0.59993	0.102602	0.783967	0.065868	0.940855	0.0416548
8.87881	0.60832	0.143119	0.783548	0.0899521	0.941542	0.0592698
8.88819	0.601148	0.0969572	0.78572	0.0612813	0.941716	0.03671
8.89757	0.601443	0.113765	0.782506	0.0731886	0.936506	0.0460164
8.91628	0.598984	0.0966048	0.78278	0.0631073	0.935509	0.037822
8.95358	0.590306	0.0887942	0.777421	0.0607209	0.928532	0.0388932
8.96289	0.593388	0.0957374	0.769835	0.0732777	0.917932	0.0473372
8.98146	0.625545	0.183473	0.780435	0.122043	0.933301	0.0817075
8.99074	0.590002	0.0895047	0.775759	0.0624804	0.930163	0.0387898
9	0.613275	0.145155	0.781083	0.0954005	0.93513	0.0622746
9.0185	0.59555	0.0842649	0.782987	0.057997	0.936155	0.0335153
9.02774	0.603124	0.117929	0.78564	0.0734345	0.941864	0.0461295
9.03696	0.602345	0.12054	0.776429	0.0819192	0.928217	0.0529106
9.05539	0.614303	0.167047	0.781576	0.108049	0.938025	0.0716438
9.07377	0.612997	0.162265	0.783052	0.104237	0.938265	0.069413
9.10128	0.581888	0.0625497	0.77106	0.0491985	0.918805	0.0265339
9.11043	0.611332	0.151159	0.784025	0.0978509	0.939442	0.0641613
9.11958	0.59904	0.104027	0.781937	0.0698001	0.940407	0.0455853
9.12871	0.610844	0.150649	0.784902	0.0953486	0.939628	0.0628863
9.13783	0.59908	0.10245	0.783552	0.0671407	0.940802	0.0425223
9.14695	0.6071	0.146554	0.782733	0.0946593	0.940573	0.0629431
9.18332	0.598075	0.102401	0.780921	0.0680772	0.933374	0.041784
9.19239	0.6339	0.207483	0.782044	0.139963	0.931808	0.0933696
9.2105	0.630097	0.200929	0.781488	0.134993	0.932635	0.0894812
9.2376	0.557775	0.0523119	0.758018	0.0473486	0.899851	0.0253228
9.24662	0.615922	0.168226	0.778856	0.114339	0.930489	0.0748846
9.25563	0.602687	0.124587	0.781821	0.0837643	0.94224	0.0556931
9.26463	0.620803	0.185031	0.782204	0.122726	0.935419	0.080799
9.27362	0.594309	0.103035	0.77806	0.069964	0.934105	0.0448978
9.2826	0.594063	0.0875285	0.780588	0.0608092	0.934331	0.0370268
9.31844	0.61095	0.160031	0.780914	0.105888	0.93508	0.0697442
9.35414	0.612881	0.163626	0.783427	0.10575	0.937504	0.0704283
9.38083	0.581256	0.0642459	0.770028	0.0501697	0.917267	0.0273739
9.39858	0.598167	0.104092	0.781153	0.071101	0.940059	0.0467366
9.40744	0.606251	0.149538	0.781417	0.100288	0.940178	0.0669974
9.42514	0.606587	0.147163	0.782443	0.0964093	0.939742	0.0645761
9.43398	0.635852	0.220726	0.783565	0.149926	0.931044	0.0986122
9.45163	0.63206	0.214321	0.783068	0.145616	0.932191	0.0951081
9.46044	0.58869	0.0733754	0.776699	0.0557788	0.925847	0.031661
9.46925	0.628403	0.207832	0.782349	0.140855	0.932864	0.0915975
9.50438	0.622241	0.197974	0.782646	0.133391	0.934596	0.0876478
9.5219	0.622193	0.189998	0.782537	0.128546	0.934345	0.0828492
9.53065	0.602234	0.124938	0.781065	0.0857731	0.942131	0.0572199
9.53939	0.620509	0.187246	0.782712	0.124913	0.935146	0.081296
9.55685	0.592891	0.088454	0.779643	0.0622093	0.933698	0.038542
9.57427	0.612624	0.177859	0.781316	0.119691	0.937037	0.0791016
9.59166	0.613146	0.173837	0.782238	0.114987	0.936748	0.0771223
9.66954	0.63128	0.207376	0.784503	0.142438	0.932216	0.0919259
9.67815	0.605833	0.150307	0.78063	0.102512	0.939962	0.0686297
9.68676	0.635759	0.229694	0.784138	0.156717	0.930872	0.100908
9.70395	0.632436	0.223492	0.784452	0.153174	0.932647	0.0984687
9.73824	0.6278	0.210445	0.783005	0.143499	0.932841	0.0923654
9.75534	0.621749	0.206481	0.78315	0.140742	0.934783	0.090703
9.77241	0.621898	0.200522	0.783067	0.135858	0.93456	0.0887302
9.79796	0.602087	0.125425	0.780138	0.0879271	0.942558	0.0582948
9.84039	0.612556	0.179759	0.780884	0.122053	0.9365	0.0806825
9.89949	0.646617	0.256433	0.788257	0.176922	0.929977	0.111408
9.91632	0.642446	0.248348	0.787016	0.171147	0.930663	0.108173
9.9415	0.605308	0.151539	0.779444	0.105104	0.940112	0.0694871
9.94987	0.634883	0.233925	0.785692	0.161258	0.932661	0.101594
9.96661	0.632589	0.227217	0.784962	0.156611	0.932691	0.0994516
10.0167	0.621648	0.209787	0.783358	0.143623	0.934723	0.091641
10.0995	0.612273	0.182381	0.779847	0.124383	0.935884	0.0823989
10.1407	0.651711	0.271222	0.790757	0.187708	0.93025	0.116214
10.1571	0.647369	0.262248	0.789869	0.181766	0.931959	0.112176
10.1735	0.643684	0.252795	0.787482	0.175048	0.930931	0.109731
10.2062	0.635648	0.239093	0.786868	0.165611	0.934185	0.102226
10.2713	0.62161	0.213907	0.783201	0.146783	0.934592	0.0931821
10.3763	0.658576	0.288064	0.79381	0.199534	0.931115	0.120995
10.3923	0.653697	0.276611	0.791331	0.192197	0.930714	0.118039
10.4083	0.649444	0.267772	0.791075	0.186052	0.932846	0.113477
10.4563	0.637216	0.243699	0.787192	0.168647	0.935104	0.103172
10.6066	0.667068	0.307386	0.796535	0.211693	0.931842	0.125944
10.6223	0.660887	0.294365	0.794815	0.204254	0.931905	0.122023
10.6536	0.651237	0.273619	0.792471	0.190118	0.934067	0.11469
10.8474	0.669589	0.314853	0.797263	0.216567	0.932477	0.126947
10.8628	0.663474	0.301027	0.796679	0.208906	0.932888	0.12253
11.083	0.672403	0.32338	0.798106	0.221217	0.933094	0.128154
11.3137	0.675249	0.333554	0.797829	0.225713	0.933064	0.130468

## Sheet: Fig.8f
	Fig.8f	FTS data
res ind	ATP-Mg	Na	Cl
0	115.225	19.4698	38.8217
1	135.188	20.6058	42.3631
2	134.999	20.5279	42.7404
3	138.748	20.8642	42.4025
4	149.082	21.3417	44.0099
5	164.25	22.3311	45.4286
6	158.698	21.9103	44.8844
7	158.112	22.0056	44.0979
8	165.202	22.2922	45.2612
9	177.746	23.1369	46.393
10	170.054	22.5106	46.134
11	168.052	22.4496	45.8341
12	171.663	22.9386	45.3903
13	154.662	22.0259	43.0942
14	141.937	21.6463	40.3035
15	134.746	21.4175	38.8377
16	132.035	21.3088	38.5393
17	133.476	21.3111	39.3894
18	139.411	21.4331	41.4899
19	148.358	22.0075	42.7562
20	135.853	21.3549	40.9921
21	126.394	21.1559	38.3832
22	121.209	21.0737	36.9816
23	119.587	21.0958	36.6445
24	121.363	21.226	37.3347
25	126.909	21.4873	39.1303
26	135.086	22.245	40.2192
27	124.933	22.2183	38.2727
28	117.652	22.8347	35.6508
29	114.191	23.9109	34.0548
30	114.169	24.6039	33.7463
31	112.452	23.6841	34.2317
32	114.401	22.3903	36.1317
33	118.69	21.7969	37.3731
34	106.152	20.6966	35.2202
35	95.7682	20.1038	32.2776
36	88.1796	19.6288	30.1659
37	82.5538	19.2396	28.66
38	78.3172	18.9264	27.557
39	75.1157	18.6806	26.7357
40	72.7261	18.4947	26.124
41	71.0055	18.3629	25.6779
42	69.8619	18.2812	25.3699
43	69.2396	18.2471	25.1837
44	69.1105	18.2597	25.1103
45	69.4707	18.3199	25.1474
46	70.3397	18.4301	25.2986
47	71.7646	18.5949	25.5747
48	73.8274	18.8212	25.9964
49	76.6617	19.1193	26.5993
50	80.4812	19.5037	27.4449
51	85.631	19.9968	28.6363
52	92.6133	20.6592	30.2904
53	101.148	21.9656	31.623
54	99.3831	23.053	30.5211
55	97.2876	22.6394	29.697
56	97.6268	22.0403	29.8463
57	99.8888	21.7977	30.399
58	104.25	21.8526	31.3957
59	111.18	22.1967	32.9378
60	120.281	23.2721	34.2053
61	118.798	24.0327	33.5843
62	117.006	23.5679	32.8137
63	118.634	22.9174	33.201
64	123.185	22.6238	34.1519
65	131.15	22.6213	35.7579
66	143.683	22.8589	38.2834
67	162.676	23.3429	42.0834
68	186.754	24.4916	45.5123
69	189.824	24.5489	45.9391
70	170.655	23.4186	43.3033
71	156.14	22.924	40.3005
72	148.105	22.6267	38.6413
73	145.11	22.486	38.0553
74	146.511	22.4912	38.398
75	152.51	22.6375	39.7273
76	164.019	22.9446	42.2002
77	179.795	23.796	44.1367
78	174.995	23.321	44.0909
79	175.503	23.3929	43.7884
80	184.251	23.6735	45.2122
81	199.144	24.5602	46.7246
82	195.485	23.9474	47.4768
83	195.755	24.347	46.4625
84	177.486	23.2795	44.5505
85	165.18	22.8245	42.6273
86	160.614	22.5651	42.4144
87	163.204	22.4861	43.9117
88	170.495	22.9425	45.09
89	157.263	21.9459	44.5445
90	149.256	21.4811	43.9108
91	146.117	21.4794	42.7664
92	123.139	20.1714	38.942
93	104.29	19.3457	34.2457
94	90.3473	18.6351	30.789
95	79.7533	18.0118	28.2258
96	71.4468	17.4665	26.2505
97	64.7663	16.9894	24.6769
98	59.2875	16.5714	23.3909
99	54.7271	16.2043	22.3196
100	50.8899	15.8813	21.4143
101	47.639	15.5974	20.6418
102	44.8785	15.3485	19.979
Fig. 8f, Experimental volume ratio data
res ind	volm rati
0	1.00684
1	0.629
2	0.551
3	0.833
4	0.622
5	0.5
6	0.551
7	0.702
8	0.638
9	0.466
10	0.479
11	0.395
12	0.366
13	0.281
14	0.273
15	0.246
16	0.397
17	0.129
18	0.278
19	0.247
20	0.247
21	0.311
22	0.271
23	0.22
24	0.369
25	0.343
26	0.285
27	0.349
28	0.358
29	0.303
30	0.231
31	0.309
32	0.175
33	0.173
34	0.091
35	0.32
36	0.223
37	0.275
38	0.213
39	0.239
40	0.097
41	0.186
42	0.193
43	0.164
44	0.17
45	0.185
46	0.146
47	0.171
48	0.158
49	0.208
50	0.128
51	0.171
52	0.075
53	0.239
54	0.201
55	0.233
56	0.199
57	0.273
58	0.22
59	0.206
60	0.274
61	0.229
62	0.294
63	0.24
64	0.22
65	0.246
66	0.306
67	0.546
68	0.493
69	0.439
70	0.574
71	0.501
72	0.606
73	0.559
74	0.452
75	0.41
76	0.283
77	0.576
78	0.396
79	0.636
80	0.717
81	0.544
82	0.692
83	0.636
84	0.717
85	0.539
86	0.142
87	0.132
88	0.382
89	0.135
90	0.311
91	0.345
92	0.262
93	0.211
94	0.04
95	0.117
96	0.078
97	0.116
98	0.114
99	0.093
100	0.056
101	0.093
